# Supplementary material for: Multi-omics analysis of immunometabolic mechanisms linking IL-33 with asthma control in children
Source: Research Square preprint supplement (doi:10.21203/rs.3.rs-8032834/v1), 2025-11-25
Supplement: Supplementary file 1 [file 294741abbbef3e5ca8e4094f.xlsx]

## Sheet: 两组比较详情表_DiffTwogroup_20250619_2
Lipid	Significant	Regulate	VIP_PLS-DA	FC(High IL-33/Low IL-33)	P_value	FDR	Category	Class	Class name
PC(18:0e/22:6)	yes	down	1.1319	0.978	0.01856	0.1352	GP	PC	phosphatidylcholine
PE(18:3e/20:4)	yes	down	1.4173	0.9698	0.01142	0.1032	GP	PE	phosphatidylethanolamine
PE(16:1e/22:6)	yes	down	1.0374	0.9827	0.02154	0.142	GP	PE	phosphatidylethanolamine
PC(18:1e/20:4)	yes	down	0.943	0.9834	0.04673	0.2416	GP	PC	phosphatidylcholine
Hex1Cer(d18:1/24:0)	yes	down	1.0538	0.9823	0.009065	0.09028	SP	Hex1Cer	Simple Glc series
PC(16:1e/16:0)	yes	down	1.0954	0.983	0.003071	0.04575	GP	PC	phosphatidylcholine
Hex1Cer(d18:1/23:0)	yes	down	0.9396	0.9834	0.03622	0.209	SP	Hex1Cer	Simple Glc series
PC(18:1e/18:2)	yes	down	0.9585	0.9836	0.02874	0.1711	GP	PC	phosphatidylcholine
CL(21:0/16:0/20:0/22:6)	yes	down	1.1705	0.9809	0.005545	0.06272	GP	CL	Cardiolipin
PC(32:1/20:4)	yes	down	1.5782	0.9645	0.0008512	0.02077	GP	PC	phosphatidylcholine
CL(23:0/16:0/18:2/22:6)	yes	down	1.098	0.9818	0.007954	0.08086	GP	CL	Cardiolipin
PC(18:0e/22:4)	yes	down	2.4702	0.8918	0.01906	0.1353	GP	PC	phosphatidylcholine
PE(18:3e/22:6)	yes	down	1.7746	0.9429	0.01392	0.1191	GP	PE	phosphatidylethanolamine
CL(16:0/20:0/18:0/20:0)	yes	down	1.0317	0.9837	0.02562	0.1583	GP	CL	Cardiolipin
dMePE(16:0e/22:6)	yes	down	1.2331	0.9723	0.01791	0.1325	GP	dMePE	dimethylphosphatidylethanolamine
CL(23:0/18:2/20:0/22:6)	yes	down	1.4748	0.9581	0.01969	0.1353	GP	CL	Cardiolipin
CL(21:1/22:6/18:1/18:2)	yes	down	2.4826	0.906	0.0008318	0.02077	GP	CL	Cardiolipin
PC(30:1/20:4)	yes	down	1.4352	0.9694	0.0007071	0.02077	GP	PC	phosphatidylcholine
CL(20:5/15:0/16:0/24:1)	yes	down	1.1043	0.9779	0.0364	0.209	GP	CL	Cardiolipin
Cer(t18:0/24:0+O)	yes	down	1.6476	0.9596	0.0003573	0.01744	SP	Cer	Ceramides
Cer(d16:0/24:0)	yes	down	1.3468	0.9711	0.0008937	0.02077	SP	Cer	Ceramides
CL(19:0/16:0/16:0/22:6)	yes	down	1.9888	0.9322	0.003174	0.04575	GP	CL	Cardiolipin
PE(18:1e/16:0)	yes	down	1.0462	0.9813	0.01197	0.1049	GP	PE	phosphatidylethanolamine
PE(18:0e/22:6)	yes	down	1.2331	0.9723	0.01791	0.1325	GP	PE	phosphatidylethanolamine
CL(12:0/20:0/20:0/14:0)	yes	down	2.1604	0.8781	0.04681	0.2416	GP	CL	Cardiolipin
CL(23:0/16:0/18:2/22:0)	yes	down	1.5062	0.9651	0.001537	0.02891	GP	CL	Cardiolipin
CL(21:0/20:1/20:0/20:4)	yes	down	1.9976	0.9395	0.0004868	0.02053	GP	CL	Cardiolipin
PC(16:1e/16:1)	yes	down	2.0365	0.9198	0.02095	0.1402	GP	PC	phosphatidylcholine
PC(32:1/18:2)	yes	down	1.8182	0.9541	2.149E-5	0.003836	GP	PC	phosphatidylcholine
PC(32:1/22:5)	yes	down	1.475	0.9685	0.0005486	0.02059	GP	PC	phosphatidylcholine
SM(t18:1/16:0)	yes	down	1.3531	0.9719	0.0002272	0.03368	SP	SM	sphingomyelin
PC(16:0e/18:1)	yes	down	1.0204	0.9839	0.004023	0.07454	GP	PC	phosphatidylcholine
MePC(20:4e/21:0)	yes	down	1.3409	0.9697	0.002583	0.07306	GP	MePC	Methyl phosphatidylcholine
SM(d20:0/18:1)	yes	down	1.1357	0.9809	0.002868	0.07306	SP	SM	sphingomyelin
PE(16:0p/22:6)	yes	down	1.0715	0.9797	0.006039	0.09816	GP	PE	phosphatidylethanolamine
PE(18:0p/18:2)	yes	down	1.049	0.9825	0.003102	0.07306	GP	PE	phosphatidylethanolamine
PC(20:4/22:6)	yes	down	1.203	0.9713	0.01155	0.1401	GP	PC	phosphatidylcholine
LPC(20:3)	yes	down	1.2925	0.9718	0.01447	0.143	GP	LPC	lysophosphatidylcholine
SM(d18:1/21:0)	yes	down	1.2551	0.9734	0.01074	0.1379	SP	SM	sphingomyelin
MePC(20:4e/23:1)	yes	down	1.1407	0.9727	0.02276	0.1824	GP	MePC	Methyl phosphatidylcholine
PC(16:2e/20:2)	yes	down	0.9861	0.9826	0.03053	0.2036	GP	PC	phosphatidylcholine
PC(18:2e/22:4)	yes	down	1.4306	0.9691	0.0009622	0.04652	GP	PC	phosphatidylcholine
PC(18:3e/22:4)	yes	down	1.0326	0.9795	0.02542	0.1849	GP	PC	phosphatidylcholine
PE(18:0p/22:6)	yes	down	1.2055	0.9759	0.002919	0.07306	GP	PE	phosphatidylethanolamine
PC(18:0e/22:5)	yes	down	1.0175	0.9784	0.0383	0.2194	GP	PC	phosphatidylcholine
PC(16:1e/22:5)	yes	down	1.1163	0.9812	0.003156	0.07306	GP	PC	phosphatidylcholine
SM(d16:1/18:3)	yes	down	1.4654	0.9608	0.01407	0.143	SP	SM	sphingomyelin
PC(18:2e/20:2)	yes	down	1.1318	0.9788	0.01138	0.1401	GP	PC	phosphatidylcholine
PC(20:4/20:4)	yes	down	1.1041	0.9783	0.01425	0.143	GP	PC	phosphatidylcholine
SM(d18:1/22:1)	yes	down	1.1538	0.9809	0.001939	0.06735	SP	SM	sphingomyelin
SM(d17:1/18:3)	yes	down	1.2492	0.9716	0.01083	0.1379	SP	SM	sphingomyelin
PC(18:3e/16:0)	yes	down	0.9975	0.9842	0.02461	0.1825	GP	PC	phosphatidylcholine
SM(t18:0/16:0)	yes	down	1.43	0.9687	8.895E-5	0.03368	SP	SM	sphingomyelin
PC(14:0e/18:2)	yes	down	1.1704	0.9773	0.00274	0.07306	GP	PC	phosphatidylcholine
SM(t18:1/24:0)	yes	down	1.4179	0.9669	0.0007278	0.04634	SP	SM	sphingomyelin
SM(d18:1/17:1)	yes	down	1.0387	0.9769	0.0223	0.1824	SP	SM	sphingomyelin
PE(18:1p/22:6)	yes	down	1.1416	0.9769	0.004251	0.07553	GP	PE	phosphatidylethanolamine
SM(d20:1/23:3)	yes	down	1.614	0.9629	0.000573	0.0398	SP	SM	sphingomyelin
PC(20:3e/24:2)	yes	down	2.3415	0.8886	0.01953	0.1755	GP	PC	phosphatidylcholine
SM(d20:0/24:4)	yes	down	1.6245	0.9649	0.0001344	0.03368	SP	SM	sphingomyelin
PC(20:2e/20:2)	yes	down	1.6824	0.9459	0.02219	0.1824	GP	PC	phosphatidylcholine
TG(4:0/18:2/22:3)	yes	down	1.0246	0.9834	0.003769	0.07454	GL	TG	triglyceride
PC(8:0e/11:3)	yes	down	1.0729	0.9734	0.03763	0.2194	GP	PC	phosphatidylcholine
SM(d19:0/24:3)	yes	down	1.1894	0.9706	0.02433	0.1825	SP	SM	sphingomyelin
SM(d20:0/24:3)	yes	down	1.3272	0.9683	0.004052	0.07454	SP	SM	sphingomyelin
PC(18:0/20:1)	yes	down	2.5828	0.8735	0.01288	0.1429	GP	PC	phosphatidylcholine
PC(20:2e/24:2)	yes	down	1.1984	0.9741	0.007724	0.1157	GP	PC	phosphatidylcholine
TG(18:3/10:2/18:2)	yes	down	1.5385	0.9627	0.0009743	0.04652	GL	TG	triglyceride
SM(d14:0/23:6)	yes	down	0.964	0.979	0.02316	0.1824	SP	SM	sphingomyelin
PC(10:0e/11:3)	yes	down	1.5083	0.9476	0.02254	0.1824	GP	PC	phosphatidylcholine
PC(18:2e/22:3)	yes	down	2.0555	0.9059	0.03409	0.21	GP	PC	phosphatidylcholine
PE(16:2e/21:0)	yes	down	1.2583	0.9783	0.0002645	0.03368	GP	PE	phosphatidylethanolamine
Cer(d16:0/18:2)	yes	down	1.6295	0.9431	0.007357	0.1124	SP	Cer	Ceramides
PG(31:1/18:3)	yes	down	1.4532	0.9605	0.02733	0.1933	GP	PG	phosphatidylglycerol
PE(18:1p/18:1)	yes	down	1.2762	0.9705	0.003435	0.07454	GP	PE	phosphatidylethanolamine
Hex1Cer(t18:0/16:1)	yes	down	1.263	0.9704	0.0009391	0.04652	SP	Hex1Cer	Simple Glc series
PE(20:0p/22:6)	yes	down	1.2503	0.9703	0.00328	0.0737	GP	PE	phosphatidylethanolamine
SM(d18:1/22:6)	yes	down	1.2199	0.9709	0.01291	0.1429	SP	SM	sphingomyelin
PE(22:6/21:1)	yes	down	1.2242	0.9662	0.0405	0.2194	GP	PE	phosphatidylethanolamine
SM(d18:0/23:0)	yes	down	1.8728	0.9363	0.008875	0.1246	SP	SM	sphingomyelin
SM(t18:1/18:3)	yes	down	0.9649	0.9788	0.0231	0.1824	SP	SM	sphingomyelin
SM(d14:0/18:4)	yes	down	2.3384	0.8722	0.02387	0.1825	SP	SM	sphingomyelin
SM(d18:1/24:5)	yes	down	1.839	0.9423	0.0001961	0.03368	SP	SM	sphingomyelin
PE(26:0/12:4)	yes	down	1.3722	0.9714	0.0004731	0.0398	GP	PE	phosphatidylethanolamine
Hex1Cer(d18:1/16:1)	yes	down	1.263	0.9703	0.0009391	0.04652	SP	Hex1Cer	Simple Glc series
PC(8:1e/12:3)	yes	down	1.3909	0.9633	0.003071	0.07306	GP	PC	phosphatidylcholine
SM(t18:1/18:2)	yes	down	1.5002	0.9604	0.0004417	0.0398	SP	SM	sphingomyelin
PE(18:0e/20:4)	yes	down	1.2128	0.9749	0.004021	0.07454	GP	PE	phosphatidylethanolamine
MePC(20:1e/20:4)	yes	down	1.2847	0.9698	0.002663	0.07306	GP	MePC	Methyl phosphatidylcholine
Cer(t18:0/25:0)	yes	down	1.0429	0.977	0.02104	0.1824	SP	Cer	Ceramides
Hex1Cer(t18:0/23:0)	yes	down	1.0677	0.9778	0.01135	0.1401	SP	Hex1Cer	Simple Glc series
MePC(12:0e/20:4)	yes	down	1.0243	0.9807	0.008351	0.1204	GP	MePC	Methyl phosphatidylcholine
PC(10:0e/6:0)	yes	down	1.5111	0.9571	0.006951	0.1095	GP	PC	phosphatidylcholine
PC(8:0e/9:0)	yes	down	1.0742	0.9735	0.03718	0.2194	GP	PC	phosphatidylcholine
PC(12:0e/6:0)	yes	down	1.3334	0.9709	0.01038	0.1368	GP	PC	phosphatidylcholine
PC(18:3e/22:6)	yes	down	2.0693	0.9111	0.001645	0.06614	GP	PC	phosphatidylcholine
PC(20:1e/24:2)	yes	down	1.2807	0.9694	0.004746	0.07882	GP	PC	phosphatidylcholine
PE(16:2e/17:0)	yes	down	2.5066	0.8334	0.04902	0.2477	GP	PE	phosphatidylethanolamine
PE(22:5/18:2)	yes	down	1.6367	0.9571	0.0002298	0.03368	GP	PE	phosphatidylethanolamine
SM(t18:1/22:3)	yes	down	1.0091	0.9785	0.02983	0.2036	SP	SM	sphingomyelin
TG(4:0/15:0/19:1)	yes	down	1.1355	0.9655	0.0338	0.2099	GL	TG	triglyceride
TG(16:0/12:0/19:0)	yes	down	1.8443	0.9429	0.0147	0.143	GL	TG	triglyceride
TG(22:4/11:3/14:4)	yes	down	1.218	0.9742	0.003836	0.07454	GL	TG	triglyceride
PE(18:0/20:4)	yes	up	1.7141	1.0456	0.01496	0.1224	GP	PE	phosphatidylethanolamine
CL(24:0/16:0/16:0/18:1)	yes	up	1.0975	1.0167	0.006429	0.06859	GP	CL	Cardiolipin
CL(18:2/16:0/18:0/22:1)	yes	up	1.7089	1.0399	0.001756	0.02956	GP	CL	Cardiolipin
PE(18:0/18:2)	yes	up	1.5694	1.0345	0.003505	0.04751	GP	PE	phosphatidylethanolamine
PE(16:0/18:2)	yes	up	1.6138	1.0388	0.003116	0.04575	GP	PE	phosphatidylethanolamine
PE(18:0/22:6)	yes	up	1.4757	1.0334	0.005189	0.06176	GP	PE	phosphatidylethanolamine
PE(16:0/18:1)	yes	up	2.0399	1.0553	3.627E-5	0.004426	GP	PE	phosphatidylethanolamine
CL(22:3/16:0/16:0/20:4)	yes	up	1.6564	1.0382	0.0006494	0.02077	GP	CL	Cardiolipin
CL(18:2/16:0/20:4/24:1)	yes	up	1.1619	1.0229	0.01961	0.1353	GP	CL	Cardiolipin
PE(18:0/18:1)	yes	up	1.8449	1.0455	0.0002682	0.01454	GP	PE	phosphatidylethanolamine
PE(16:0/20:4)	yes	up	1.4544	1.0302	0.001644	0.02891	GP	PE	phosphatidylethanolamine
PE(18:1/18:2)	yes	up	1.5242	1.0418	0.02236	0.1433	GP	PE	phosphatidylethanolamine
CL(18:2/18:0/20:4/22:1)	yes	up	1.7868	1.0416	0.0007293	0.02077	GP	CL	Cardiolipin
PE(18:0/20:3)	yes	up	1.3375	1.03	0.009451	0.09044	GP	PE	phosphatidylethanolamine
CL(18:2/16:0/16:0/20:1)	yes	up	1.7948	1.046	0.0009654	0.02086	GP	CL	Cardiolipin
CL(23:0/18:0/18:1/20:4)	yes	up	1.4504	1.0321	0.001084	0.02204	GP	CL	Cardiolipin
PE(18:0/22:5)	yes	up	1.6008	1.0382	0.000983	0.02086	GP	PE	phosphatidylethanolamine
PE(18:1/20:4)	yes	up	1.5379	1.0385	0.006466	0.06859	GP	PE	phosphatidylethanolamine
PE(18:0/22:4)	yes	up	1.563	1.0427	0.009445	0.09044	GP	PE	phosphatidylethanolamine
PC(16:1/18:2)	yes	up	2.4233	1.0835	0.00503	0.06176	GP	PC	phosphatidylcholine
PE(16:0/22:5)	yes	up	1.7298	1.041	0.0002206	0.01454	GP	PE	phosphatidylethanolamine
dMePE(18:1/20:4)	yes	up	1.4354	1.0356	0.009792	0.09189	GP	dMePE	dimethylphosphatidylethanolamine
CL(18:3/16:0/18:2/22:0)	yes	up	2.2819	1.1203	0.04724	0.2416	GP	CL	Cardiolipin
PS(18:2/22:6)	yes	up	1.8207	1.0519	0.0008157	0.02077	GP	PS	phosphatidylserine
CL(21:1/18:0/18:2/20:0)	yes	up	1.647	1.0467	0.005174	0.06176	GP	CL	Cardiolipin
Hex1Cer(t17:1/20:4)	yes	up	1.7436	1.0393	1.639E-5	0.003836	SP	Hex1Cer	Simple Glc series
PS(20:2/20:4)	yes	up	1.9837	1.0579	0.0007154	0.02077	GP	PS	phosphatidylserine
PE(18:1/18:1)	yes	up	2.2676	1.0815	0.001545	0.02891	GP	PE	phosphatidylethanolamine
CL(22:5/20:4/16:0/20:0)	yes	up	1.8749	1.0482	0.0001015	0.008252	GP	CL	Cardiolipin
CL(20:4/18:1/20:0/20:4)	yes	up	1.6236	1.0425	0.004499	0.05934	GP	CL	Cardiolipin
PE(16:0/22:4)	yes	up	1.7644	1.0655	0.02665	0.1624	GP	PE	phosphatidylethanolamine
CL(22:5/18:0/20:4/22:0)	yes	up	1.8118	1.0562	0.003243	0.04575	GP	CL	Cardiolipin
CL(18:2/16:0/20:0/20:3)	yes	up	1.9922	1.0612	0.003066	0.04575	GP	CL	Cardiolipin
PS(18:1/20:2)	yes	up	2.2972	1.0798	0.000257	0.01454	GP	PS	phosphatidylserine
PS(18:2/18:2)	yes	up	2.1623	1.0856	0.004984	0.06176	GP	PS	phosphatidylserine
CL(22:6/18:1/20:0/22:6)	yes	up	1.0707	1.0207	0.01587	0.127	GP	CL	Cardiolipin
CL(23:0/20:3/20:4/18:0)	yes	up	1.837	1.0664	0.01113	0.1025	GP	CL	Cardiolipin
PC(18:2e/18:2)	yes	up	1.2508	1.0161	5.585E-5	0.005451	GP	PC	phosphatidylcholine
CL(18:2/20:4/22:3/22:6)	yes	up	1.5494	1.0452	0.007947	0.08086	GP	CL	Cardiolipin
CL(22:6/18:0/20:0/22:5)	yes	up	1.6736	1.0405	0.001659	0.02891	GP	CL	Cardiolipin
CL(18:1/16:0/18:0/18:0)	yes	up	2.1686	1.0634	2.358E-5	0.003836	GP	CL	Cardiolipin
CL(18:2/16:0/16:0/24:1)	yes	up	1.3865	1.051	0.04753	0.2416	GP	CL	Cardiolipin
CL(18:2/18:0/18:0/20:3)	yes	up	2.1521	1.1085	0.01204	0.1049	GP	CL	Cardiolipin
CL(24:2/18:0/18:2/22:5)	yes	up	1.7251	1.0444	0.0005048	0.02053	GP	CL	Cardiolipin
TG(16:0/16:0/18:1)	yes	up	0.9753	1.0155	0.01491	0.143	GL	TG	triglyceride
TG(18:0/16:0/18:1)	yes	up	1.2217	1.027	0.03104	0.2036	GL	TG	triglyceride
TG(18:0/18:1/18:1)	yes	up	1.4775	1.0331	0.002974	0.07306	GL	TG	triglyceride
TG(16:0/16:0/16:0)	yes	up	1.3494	1.0384	0.04141	0.2194	GL	TG	triglyceride
PC(16:0/22:6)	yes	up	1.1343	1.0195	0.00436	0.07571	GP	PC	phosphatidylcholine
PC(18:1/22:6)	yes	up	1.0094	1.0208	0.01826	0.1681	GP	PC	phosphatidylcholine
PC(16:0/18:1)	yes	up	1.1396	1.0201	0.004066	0.07454	GP	PC	phosphatidylcholine
PC(15:0/20:4)	yes	up	1.2625	1.0268	0.01328	0.1429	GP	PC	phosphatidylcholine
TG(16:0/14:0/18:1)	yes	up	1.15	1.0277	0.04928	0.2477	GL	TG	triglyceride
PC(17:1/20:4)	yes	up	1.7274	1.0712	0.04126	0.2194	GP	PC	phosphatidylcholine
TG(16:0/16:0/22:6)	yes	up	1.2228	1.0312	0.02438	0.1825	GL	TG	triglyceride
SM(d18:1/18:3)	yes	up	1.3744	1.0371	0.03223	0.2036	SP	SM	sphingomyelin
PC(16:1/20:4)	yes	up	1.1001	1.0202	0.01241	0.1429	GP	PC	phosphatidylcholine
CL(20:4/16:1/18:0/24:1)	yes	up	0.9563	1.0201	0.03355	0.2099	GP	CL	Cardiolipin
TG(16:0/18:1/22:0)	yes	up	1.7933	1.0692	0.0253	0.1849	GL	TG	triglyceride
MePC(22:6/11:1)	yes	up	1.3438	1.0385	0.03069	0.2036	GP	MePC	Methyl phosphatidylcholine
TG(20:0/18:1/18:1)	yes	up	1.5967	1.0506	0.02268	0.1824	GL	TG	triglyceride
CL(22:6/16:1/22:0/22:3)	yes	up	1.0548	1.0217	0.01317	0.1429	GP	CL	Cardiolipin
PC(15:0/18:3)	yes	up	1.5249	1.0425	0.001857	0.06735	GP	PC	phosphatidylcholine
PC(22:6/13:0)	yes	up	1.2838	1.0303	0.01364	0.143	GP	PC	phosphatidylcholine
TG(16:0/18:1/23:0)	yes	up	1.6089	1.0618	0.03865	0.2194	GL	TG	triglyceride
TG(18:0/16:0/17:0)	yes	up	2.3719	1.1202	0.004098	0.07454	GL	TG	triglyceride
TG(18:0/18:1/24:0)	yes	up	2.183	1.1264	0.04049	0.2194	GL	TG	triglyceride
PC(18:2/13:0)	yes	up	1.1739	1.0302	0.02813	0.1954	GP	PC	phosphatidylcholine
PC(10:1e/14:4)	yes	up	1.0776	1.024	0.02008	0.1784	GP	PC	phosphatidylcholine
TG(18:0/16:0/22:6)	yes	up	1.4076	1.0429	0.02138	0.1824	GL	TG	triglyceride
TG(25:0/16:0/18:1)	yes	up	1.721	1.0781	0.03902	0.2194	GL	TG	triglyceride
TG(16:0/18:1/23:1)	yes	up	1.5684	1.0525	0.007985	0.1173	GL	TG	triglyceride
PC(16:1e/24:2)	yes	up	2.2022	1.1241	0.03687	0.2194	GP	PC	phosphatidylcholine
CL(20:4/16:0/20:0/22:0)	yes	up	1.2711	1.0262	0.001868	0.06735	GP	CL	Cardiolipin
PE(8:1e/14:4)	yes	up	1.5558	1.0422	0.001063	0.04778	GP	PE	phosphatidylethanolamine
MePC(18:4/16:1)	yes	up	1.2164	1.0238	0.002562	0.07306	GP	MePC	Methyl phosphatidylcholine
PE(19:0/18:2)	yes	up	1.7312	1.0489	0.001512	0.06417	GP	PE	phosphatidylethanolamine
PC(11:0/22:4)	yes	up	1.5106	1.0384	0.002131	0.0708	GP	PC	phosphatidylcholine
TG(18:1/10:1/18:2)	yes	up	2.499	1.1601	0.01423	0.143	GL	TG	triglyceride
PE(18:1p/20:5)	yes	up	1.1319	1.0386	0.03931	0.2194	GP	PE	phosphatidylethanolamine
Cer(t18:1/22:2)	yes	up	1.0672	1.026	0.02387	0.1825	SP	Cer	Ceramides
MePC(12:0/22:6)	yes	up	0.986	1.0201	0.04069	0.2194	GP	MePC	Methyl phosphatidylcholine
MePC(18:4/20:4)	yes	up	1.4383	1.0373	0.01497	0.143	GP	MePC	Methyl phosphatidylcholine
TG(18:1/18:2/21:0)	yes	up	2.0563	1.1188	0.0258	0.1859	GL	TG	triglyceride
