# Supplementary material for: Multi-omics analysis of immunometabolic mechanisms linking IL-33 with asthma control in children
Source: Research Square preprint supplement (doi:10.21203/rs.3.rs-8032834/v1), 2025-11-25
Supplement: Supplementary file 2 [file 5fec17a8ac8ed30de47edfa4.xlsx]

## Sheet: 差异蛋白详情表
Accession	Symbol	Protein Name	Entrez ID	Description	FC(High IL-33/Low IL-33)	Log2FC(SYZ/DZZ)	P_value(SYZ/DZZ)	Regulate	Significant	High IL-33	Low IL-33	L1	L2	L3	L4	L5	L6	H1	H2	H3	H4	H5	H6	GO Term	GO ID	KO ID	KO Name	Pathway ID	Pathway_defition	EggNOG ID	EggNOG_Functional Categories	Pfam ID	Domain	Domain Description	Subcellular Loc
ENSP00000225655.5	PFN1	Profilin-1	5216	pep chromosome:GRCh38:17:4945652:4948530:-1 gene:ENSG00000108518.8 transcript:ENST00000225655.6 gene_biotype:protein_coding transcript_biotype:protein_coding gene_symbol:PFN1 description:profilin 1 [Source:HGNC Symbol;Acc:HGNC:8881]	2.1192	1.0835	0.0301	up	yes	11650	5497.45	10077.8	7150.44	2304.51	4875.73	4383.33	4192.89	14984.8	16022.6	17069.7	7443.57	10632.1	3747.09	BP:tube formation;BP:regulation of primary metabolic process;BP:regulation of metabolic process;BP:regulation of actin polymerization or depolymerization;BP:regulation of cell projection assembly;BP:regulation of cell projection organization;BP:cellular component organization or biogenesis;BP:positive regulation of cell projection organization;BP:regulation of actin filament bundle assembly;BP:ne…	GO:0035148;GO:0080090;GO:0019222;GO:0008064;GO:0060491;GO:0031344;GO:0071840;GO:0031346;GO:0032231;GO:0032232;GO:0032233;GO:0051497;GO:0051495;GO:0051493;GO:0051492;GO:0099177;GO:0048518;GO:0048519;GO:0060255;GO:2001141;GO:0050804;GO:0010634;GO:0010638;GO:0010639;GO:0048646;GO:0031333;GO:0032535;GO:0051252;GO:0120035;GO:0050821;GO:0120034;GO:0050789;GO:0016043;GO:0090066;GO:0065007;GO:0001843;GO:…	K05759	PFN	hsa05014;hsa05132;hsa04015;hsa05131;hsa04810	Amyotrophic lateral sclerosis;Salmonella infection;Rap1 signaling pathway;Shigellosis;Regulation of actin cytoskeleton	ENOG41126PD	O:Posttranslational modification, protein turnover, chaperones	PF00235.25	Profilin	Profilin	cytoplasmic
ENSP00000357076.1	TAGLN2	Transgelin-2	8407	pep chromosome:GRCh38:1:159918107:159923717:-1 gene:ENSG00000158710.15 transcript:ENST00000368096.5 gene_biotype:protein_coding transcript_biotype:protein_coding gene_symbol:TAGLN2 description:transgelin 2 [Source:HGNC Symbol;Acc:HGNC:11554]	2.4032	1.265	0.02402	up	yes	10077.9	4193.62	8136.33	4395.29	1875.14	3447.13	4152.29	3155.54	15032.9	14101.3	13909.8	5933.3	8426.57	3063.7	BP:cell differentiation;BP:cellular component organization or biogenesis;BP:cellular developmental process;BP:fibril organization;BP:cellular component organization;BP:epithelial cell differentiation;BP:developmental process;BP:cellular process;BP:biological_process;BP:actin filament organizationCC:actin cytoskeleton;CC:intracellular organelle;CC:non-membrane-bounded organelle;CC:membrane-bounded…	GO:0030154;GO:0071840;GO:0048869;GO:0097435;GO:0016043;GO:0030855;GO:0032502;GO:0009987;GO:0008150;GO:0007015GO:0015629;GO:0043229;GO:0043228;GO:0043227;GO:0043226;GO:0005856;GO:1903561;GO:0031982;GO:0110165;GO:0070062;GO:0043230;GO:0043232;GO:0005829;GO:0005575;GO:0005576;GO:0065010GO:0003674;GO:0005488;GO:0003779;GO:0051015;GO:0050839;GO:0008092;GO:0045296;GO:0005515;GO:0044877	K20526	TAGLN	------	------	COG5199	O:Posttranslational modification, protein turnover, chaperones	PF00307.36;PF00402.23	CH;Calponin	Calponin homology;Calponin family repeat	nuclear
ENSP00000353467.4	FLNA	Filamin-A	2316	pep chromosome:GRCh38:X:154348529:154371283:-1 gene:ENSG00000196924.19 transcript:ENST00000360319.9 gene_biotype:protein_coding transcript_biotype:protein_coding gene_symbol:FLNA description:filamin A [Source:HGNC Symbol;Acc:HGNC:3754]	2.0394	1.0281	0.02898	up	yes	8078.73	3961.3	6401.82	3262.73	3331.38	4233.77	2956.18	3581.93	6593.01	12247.5	12213.6	6140.46	8633.74	2644.01	BP:regulation of intracellular protein transport;BP:protein localization;BP:regulation of primary metabolic process;BP:regulation of metabolic process;BP:regulation of transport;BP:regulation of intracellular transport;BP:positive regulation of response to stimulus;BP:regulation of axon regeneration;BP:signal transduction;BP:positive regulation of transmembrane transport;BP:regulation of ion tran…	GO:0033157;GO:0008104;GO:0080090;GO:0019222;GO:0051049;GO:0032386;GO:0048584;GO:0048679;GO:0007165;GO:0034764;GO:0034765;GO:0034767;GO:0031345;GO:0031344;GO:0071840;GO:0031346;GO:0032231;GO:0010605;GO:0070727;GO:0009966;GO:0009967;GO:0051764;GO:0033043;GO:0051493;GO:0097435;GO:0043066;GO:0098903;GO:0098900;GO:0048518;GO:0048519;GO:0033036;GO:0048762;GO:0042306;GO:0051050;GO:0060255;GO:0048583;GO:…	K04437	FLNA	hsa05205;hsa05132;hsa04510;hsa04010	Proteoglycans in cancer;Salmonella infection;Focal adhesion;MAPK signaling pathway	COG5069	O:Posttranslational modification, protein turnover, chaperones	PF00630.25;PF23616.1;PF00307.36	Filamin;Ig_GEX2_N;CH	Filamin/ABP280 repeat;GEX2 N-terminal Ig-like domain;Calponin homology	cytoplasmic
ENSP00000316029.9	TLN1	Talin-1	7094	pep chromosome:GRCh38:9:35696948:35732195:-1 gene:ENSG00000137076.22 transcript:ENST00000314888.10 gene_biotype:protein_coding transcript_biotype:protein_coding gene_symbol:TLN1 description:talin 1 [Source:HGNC Symbol;Acc:HGNC:11845]	2.0031	1.0022	0.04891	up	yes	7914.37	3951.08	7788.06	3382.6	2091.76	3782.58	3790.44	2871.02	7552.44	12791.4	11883.1	4916.49	7450.92	2891.82	BP:cell-cell junction organization;BP:signal transduction;BP:cell surface receptor signaling pathway;BP:regulation of focal adhesion assembly;BP:cellular component organization or biogenesis;BP:macromolecular complex assembly;BP:cell junction assembly;BP:regulation of cell junction assembly;BP:cell-substrate junction assembly;BP:cellular component assembly;BP:cellular component organization;BP:re…	GO:0045216;GO:0007165;GO:0007166;GO:0051893;GO:0071840;GO:0065003;GO:0034329;GO:1901888;GO:0007044;GO:0022607;GO:0016043;GO:0090109;GO:0065007;GO:0098609;GO:0050794;GO:0008150;GO:0007229;GO:0030866;GO:0030865;GO:0030155;GO:0051128;GO:0007043;GO:0009987;GO:0150116;GO:0150115;GO:0001952;GO:0043933;GO:0034330;GO:0030036;GO:0050789;GO:0033622;GO:0030029;GO:0010810;GO:0034109;GO:0007155;GO:0006996;GO:…	K06271	TLN	hsa05131;hsa04611;hsa04015;hsa04820;hsa04510;hsa05166	Shigellosis;Platelet activation;Rap1 signaling pathway;Cytoskeleton in muscle cells;Focal adhesion;Human T-cell leukemia virus 1 infection	ENOG410XQ0V	U:Intracellular trafficking, secretion, and vesicular transport	PF21896.2;PF21865.2;PF08913.16;PF09141.16;PF21692.3;PF01608.23;PF16511.11;PF02174.23;PF00373.23;PF21989.2;PF09379.16	Talin_IBS2B;TLN1-like_RS;VBS;Talin_middle;Talin_R4;I_LWEQ;FERM_f0;IRS;FERM_M;RA_2;FERM_N	Talin IBS2B domain;Talin 1-like, rod segment domain;Vinculin Binding Site;Talin, middle domain;Talin, R4 domain;I/LWEQ domain;N-terminal or F0 domain of Talin-head FERM;PTB domain;FERM central domain;RA like domain;FERM N-terminal domain	cytoplasmic
ENSP00000270792.5	SH3BGRL3	SH3 domain-binding glutamic acid-rich-like protein 3	83442	pep chromosome:GRCh38:1:26280086:26281522:1 gene:ENSG00000142669.15 transcript:ENST00000270792.10 gene_biotype:protein_coding transcript_biotype:protein_coding gene_symbol:SH3BGRL3 description:SH3 domain binding glutamate rich protein like 3 [Source:HGNC Symbol;Acc:HGNC:15568]	2.591	1.3735	0.0338	up	yes	7200.11	2778.86	2368.61	4854.15	2020.09	1104.18	3141.26	3184.89	11652.9	8201.3	10818.4	2478.53	8433.72	1615.81	BP:organelle organization;BP:cytoskeleton organization;BP:cellular process;BP:cellular component organization;BP:biological_process;BP:cellular component organization or biogenesisCC:cytoplasm;CC:membrane;CC:intracellular membrane-bounded organelle;CC:ruffle membrane;CC:plasma membrane region;CC:leading edge membrane;CC:cytosol;CC:cell projection membrane;CC:organelle;CC:cellular_component;CC:int…	GO:0006996;GO:0007010;GO:0009987;GO:0016043;GO:0008150;GO:0071840GO:0005737;GO:0016020;GO:0043231;GO:0032587;GO:0098590;GO:0031256;GO:0005829;GO:0031253;GO:0043226;GO:0005575;GO:0043229;GO:0043227;GO:0005634;GO:0110165	K23740	SH3BGR	------	------	ENOG4111N7M	U:Intracellular trafficking, secretion, and vesicular transport	PF04908.21;PF00462.30	SH3BGR;Glutaredoxin	SH3-binding, glutamic acid-rich protein;Glutaredoxin	cytoplasmic
ENSP00000494798.1	ZYX	Zyxin	7791	pep scaffold:GRCh38:HG708_PATCH:709:10475:1 gene:ENSG00000285443.2 transcript:ENST00000646695.2 gene_biotype:protein_coding transcript_biotype:protein_coding gene_symbol:ZYX description:zyxin [Source:HGNC Symbol;Acc:HGNC:13200]	2.1738	1.1202	0.04982	up	yes	6055.63	2785.8	6282.98	2681.43	1670.48	1973.65	2736.37	1369.86	7568.72	9124.63	9259.85	3203.64	5327.9	1849.04	BP:contractile actin filament bundle assembly;BP:cellular component assembly;BP:response to stimulus;BP:enzyme linked receptor protein signaling pathway;BP:actin cytoskeleton organization;BP:cell-matrix adhesion;BP:regulation of biological process;BP:cell surface receptor signaling pathway;BP:cell communication;BP:cellular component organization or biogenesis;BP:fibril organization;BP:cellular co…	GO:0030038;GO:0022607;GO:0050896;GO:0007167;GO:0030036;GO:0007160;GO:0050789;GO:0007166;GO:0007154;GO:0071840;GO:0097435;GO:0016043;GO:0065007;GO:0043149;GO:0031589;GO:0034097;GO:0030029;GO:0007267;GO:0009987;GO:0051017;GO:0050794;GO:0008150;GO:0007155;GO:0042221;GO:0034341;GO:0007179;GO:0007178;GO:0006996;GO:0007015;GO:0061572;GO:0007010;GO:0071345;GO:0007229;GO:0071346;GO:0031032;GO:1901652;GO:…	K06273	ZYX	hsa04820;hsa04510	Cytoskeleton in muscle cells;Focal adhesion	ENOG410Y3GP	E:Amino acid transport and metabolism	PF00412.28	LIM	LIM domain	cytoplasmic
ENSP00000487611.1	IGHV3-43	Immunoglobulin heavy variable 3-43	-	pep scaffold:GRCh38:HSCHR14_3_CTG1:961942:962479:-1 gene:ENSG00000282151.1 transcript:ENST00000633040.1 gene_biotype:IG_V_gene transcript_biotype:IG_V_gene gene_symbol:IGHV3-43 description:immunoglobulin heavy variable 3-43 [Source:HGNC Symbol;Acc:HGNC:5604]	0.4676	-1.0967	0.009908	down	yes	1798.91	3847.01	1606.52	4570.36	4836	4802.25	4073.19	3193.75	1822.64	2827.32	1104.3	1720.74	436.857	2881.6	BP:immune system process;BP:immunoglobulin mediated immune response;BP:B cell mediated immunity;BP:lymphocyte mediated immunity;BP:biological_process;BP:immune response;BP:leukocyte mediated immunity;BP:adaptive immune response based on somatic recombination of immune receptors built from immunoglobulin superfamily domains;BP:response to stimulus;BP:adaptive immune response;BP:immune effector pro…	GO:0002376;GO:0016064;GO:0019724;GO:0002449;GO:0008150;GO:0006955;GO:0002443;GO:0002460;GO:0050896;GO:0002250;GO:0002252GO:0005886;GO:0019814;GO:0016020;GO:0072562;GO:0110165;GO:0032991;GO:0005575;GO:0005576GO:0003674;GO:0005488;GO:0003823	K06856	IGH	hsa05130;hsa04666;hsa04613;hsa04650;hsa04020;hsa05330;hsa04672;hsa04145;hsa05310;hsa04064;hsa05414;hsa05416;hsa05135;hsa05143;hsa05140;hsa05146;hsa05169;hsa05322;hsa05323;hsa05320;hsa05202;hsa04662;hsa04072;hsa04664;hsa04640;hsa05340;hsa04151;hsa05150;hsa05152;hsa05171	Pathogenic Escherichia coli infection;Fc gamma R-mediated phagocytosis;Neutrophil extracellular trap formation;Natural killer cell mediated cytotoxicity;Calcium signaling pathway;Allograft rejection;Intestinal immune network for IgA production;Phagosome;Asthma;NF-kappa B signaling pathway;Dilated cardiomyopathy;Viral myocarditis;Yersinia infection;African trypanosomiasis;Leishmaniasis;Amoebiasis;…	ENOG410YMG4;ENOG410YRS8	S:Function unknown;	PF07686.23	V-set	Immunoglobulin V-set domain	lysosomal
ENSP00000228945.4	ARHGDIB	Rho GDP-dissociation inhibitor 2	397	pep chromosome:GRCh38:12:14942031:14961601:-1 gene:ENSG00000111348.9 transcript:ENST00000228945.9 gene_biotype:protein_coding transcript_biotype:protein_coding gene_symbol:ARHGDIB description:Rho GDP dissociation inhibitor beta [Source:HGNC Symbol;Acc:HGNC:679]	2.1783	1.1232	0.02804	up	yes	3328.43	1527.97	2902.93	1556.18	821.605	1314.74	1458.36	1113.98	4367.28	3943.03	5137.63	1619.12	3668.17	1235.34	BP:regulation of small GTPase mediated signal transduction;BP:negative regulation of multicellular organismal process;BP:negative regulation of reproductive process;BP:regulation of signaling;BP:regulation of response to stimulus;BP:regulation of intracellular signal transduction;BP:regulation of Rho protein signal transduction;BP:intracellular signal transduction;BP:negative regulation of locomo…	GO:0051056;GO:0051241;GO:2000242;GO:0023051;GO:0048583;GO:1902531;GO:0035023;GO:0035556;GO:0040013;GO:0051775;GO:0010646;GO:0009966;GO:0050789;GO:0030336;GO:0065007;GO:1901164;GO:0048519;GO:1901163;GO:0030334;GO:0009987;GO:0050794;GO:0008150;GO:0051239;GO:0007266;GO:2000241;GO:0007264;GO:0040012;GO:2000145;GO:0071461;GO:2000146;GO:0007165;GO:0050896;GO:0048523GO:0043229;GO:0043228;GO:0043227;GO:0…	K12462	ARHGDI, RHOGDI	hsa04962;hsa04722	Vasopressin-regulated water reabsorption;Neurotrophin signaling pathway	ENOG4111K44	O:Posttranslational modification, protein turnover, chaperones	PF02115.23	Rho_GDI	RHO protein GDP dissociation inhibitor	cytoplasmic
ENSP00000373745.4	PKM	Pyruvate kinase	5315	pep chromosome:GRCh38:15:72199029:72231386:-1 gene:ENSG00000067225.21 transcript:ENST00000389093.7 gene_biotype:protein_coding transcript_biotype:protein_coding gene_symbol:PKM description:pyruvate kinase M1/2 [Source:HGNC Symbol;Acc:HGNC:9021]	2.2082	1.1429	0.04585	up	yes	2373.89	1075.04	2039.66	1258.85	609.236	756.498	1074.84	711.145	2389.24	4021.01	3594.88	1501.01	2187.43	549.8	BP:organophosphate catabolic process;BP:regulation of metabolic process;BP:regulation of RNA biosynthetic process;BP:nucleotide catabolic process;BP:canonical glycolysis;BP:glycolytic process through glucose-6-phosphate;BP:positive regulation of sprouting angiogenesis;BP:small molecule metabolic process;BP:small molecule catabolic process;BP:regulation of primary metabolic process;BP:cellular res…	GO:0046434;GO:0019222;GO:2001141;GO:0009166;GO:0061621;GO:0061620;GO:1903672;GO:0044281;GO:0044282;GO:0080090;GO:0051716;GO:0010608;GO:0009199;GO:0055086;GO:0048518;GO:0009191;GO:0009205;GO:0060255;GO:0046034;GO:0046031;GO:0046032;GO:0043436;GO:0043434;GO:0009179;GO:0009891;GO:0016052;GO:0006163;GO:1901136;GO:0019637;GO:0019320;GO:1903670;GO:0022603;GO:0009141;GO:0009144;GO:0061718;GO:1901342;GO:…	K00873	PK, pyk	hsa00620;hsa01100;hsa05203;hsa01200;hsa05230;hsa01230;hsa05165;hsa00010;hsa04930;hsa04922	Pyruvate metabolism;Metabolic pathways;Viral carcinogenesis;Carbon metabolism;Central carbon metabolism in cancer;Biosynthesis of amino acids;Human papillomavirus infection;Glycolysis / Gluconeogenesis;Type II diabetes mellitus;Glucagon signaling pathway	COG0469	G:Carbohydrate transport and metabolism	PF00224.27;PF02887.21	PK;PK_C	Pyruvate kinase, barrel domain;Pyruvate kinase, alpha/beta domain	cytoplasmic
ENSP00000256682.4	ARF3	ADP-ribosylation factor 3	377	pep chromosome:GRCh38:12:48935723:48957487:-1 gene:ENSG00000134287.10 transcript:ENST00000256682.9 gene_biotype:protein_coding transcript_biotype:protein_coding gene_symbol:ARF3 description:ADP ribosylation factor 3 [Source:HGNC Symbol;Acc:HGNC:654]	2.4998	1.3218	0.008535	up	yes	2342.96	937.255	1847.77	669.883	423.573	1180.26	1021.69	480.353	2524.41	3365.55	3161.86	1864.84	2262.77	878.356	BP:protein localization;BP:cellular macromolecule localization;BP:intracellular protein transport;BP:nitrogen compound transport;BP:macromolecule localization;BP:transport;BP:cellular process;BP:establishment of protein localization;BP:biological_process;BP:establishment of localization in cell;BP:establishment of localization;BP:localization;BP:cellular localization;BP:intracellular transport;BP…	GO:0008104;GO:0070727;GO:0006886;GO:0071705;GO:0033036;GO:0006810;GO:0009987;GO:0045184;GO:0008150;GO:0051649;GO:0051234;GO:0051179;GO:0051641;GO:0046907;GO:0015031;GO:0016192GO:0005886;GO:0043229;GO:0043227;GO:0043226;GO:0016020;GO:0110165;GO:0005794;GO:0043231;GO:0005575GO:0016787;GO:0035639;GO:1901363;GO:0003674;GO:0005488;GO:0019001;GO:1901265;GO:0043168;GO:0000166;GO:0032561;GO:0017076;GO:00…	K07938	ARF3	hsa04144	Endocytosis	COG1100;COG1100	I:Lipid transport and metabolism;Q:Secondary metabolites biosynthesis, transport and catabolism	PF00025.27;PF08477.19;PF09439.16;PF00071.28;PF00503.26;PF04670.18	Arf;Roc;SRPRB;Ras;G-alpha;Gtr1_RagA	ADP-ribosylation factor family;Ras of Complex, Roc, domain of DAPkinase;Signal recognition particle receptor beta subunit;Ras family;G-protein alpha subunit;Gtr1/RagA G protein conserved region	cytoplasmic
ENSP00000500756.1	CTTN	Src substrate cortactin	2017	pep scaffold:GRCh38:HG2115_PATCH:159817:197863:1 gene:ENSG00000288401.1 transcript:ENST00000671805.1 gene_biotype:protein_coding transcript_biotype:protein_coding gene_symbol:CTTN description:cortactin [Source:HGNC Symbol;Acc:HGNC:3338]	2.2357	1.1607	0.01615	up	yes	1641.89	734.409	1296.37	794.986	399.225	465.537	735.726	714.615	1387.08	2391.6	2600.14	1155.52	1480.95	836.072	BP:negative regulation of apoptotic signaling pathway;BP:regulation of extrinsic apoptotic signaling pathway;BP:negative regulation of extrinsic apoptotic signaling pathway;BP:regulation of metabolic process;BP:regulation of apoptotic signaling pathway;BP:cellular component maintenance;BP:negative regulation of response to stimulus;BP:regulation of response to stimulus;BP:regulation of actin poly…	GO:2001234;GO:2001236;GO:2001237;GO:0019222;GO:2001233;GO:0043954;GO:0048585;GO:0048583;GO:0008064;GO:0008104;GO:0007165;GO:0007166;GO:0045987;GO:0071840;GO:0097061;GO:0097062;GO:0009968;GO:0070727;GO:0009966;GO:0051495;GO:0051493;GO:0099173;GO:0048518;GO:0048519;GO:0033036;GO:0006930;GO:0006937;GO:0045184;GO:0030516;GO:0016192;GO:0023057;GO:0010506;GO:0048870;GO:0010638;GO:0032535;GO:0009894;GO:…	K06106	CTTN, EMS1	hsa04530;hsa05205;hsa05131;hsa05130;hsa05100	Tight junction;Proteoglycans in cancer;Shigellosis;Pathogenic Escherichia coli infection;Bacterial invasion of epithelial cells	ENOG410XTAK	S:Function unknown	PF02218.20;PF14604.12;PF00018.34;PF07653.23	HS1_rep;SH3_9;SH3_1;SH3_2	Repeat in HS1/Cortactin;Variant SH3 domain;SH3 domain;Variant SH3 domain	cytoplasmic
ENSP00000258737.7	RAC1	Ras-related C3 botulinum toxin substrate 1	5879	pep chromosome:GRCh38:7:6374527:6403967:1 gene:ENSG00000136238.20 transcript:ENST00000348035.9 gene_biotype:protein_coding transcript_biotype:protein_coding gene_symbol:RAC1 description:Rac family small GTPase 1 [Source:HGNC Symbol;Acc:HGNC:9801]	2.43	1.281	0.03695	up	yes	1608.3	661.861	1640.6	452.177	319.233	749.852	481.867	327.435	1540.97	1872.08	3033.12	1265.65	1376.67	561.313	BP:regulation of primary metabolic process;BP:regulation of metabolic process;BP:membrane organization;BP:macromolecular complex subunit organization;BP:establishment or maintenance of cell polarity;BP:signal transduction;BP:cell surface receptor signaling pathway;BP:cell chemotaxis;BP:regulation of phosphate metabolic process;BP:cellular component organization or biogenesis;BP:neuron projection …	GO:0080090;GO:0019222;GO:0061024;GO:0043933;GO:0007163;GO:0007165;GO:0007166;GO:0060326;GO:0019220;GO:0071840;GO:0097485;GO:0042330;GO:0043652;GO:0051493;GO:0048518;GO:0065007;GO:0006935;GO:0060255;GO:0008360;GO:0030041;GO:0042325;GO:0065008;GO:0048870;GO:0071526;GO:0022604;GO:0022607;GO:0009893;GO:1902622;GO:0031175;GO:0120036;GO:0035556;GO:0050789;GO:0045937;GO:0016601;GO:0016043;GO:0065003;GO:…	K04392	RAC1	hsa05132;hsa05131;hsa05130;hsa04613;hsa05212;hsa04650;hsa05210;hsa05211;hsa04024;hsa04530;hsa04670;hsa04145;hsa05231;hsa04510;hsa04380;hsa04148;hsa04062;hsa05415;hsa05416;hsa05417;hsa05135;hsa05020;hsa05022;hsa04520;hsa04810;hsa04310;hsa05163;hsa05120;hsa05208;hsa05100;hsa05205;hsa04620;hsa05200;hsa05203;hsa04071;hsa04662;hsa04014;hsa04664;hsa04666;hsa04010;hsa04151;hsa04932;hsa04933;hsa05418;hsa…	Salmonella infection;Shigellosis;Pathogenic Escherichia coli infection;Neutrophil extracellular trap formation;Pancreatic cancer;Natural killer cell mediated cytotoxicity;Colorectal cancer;Renal cell carcinoma;cAMP signaling pathway;Tight junction;Leukocyte transendothelial migration;Phagosome;Choline metabolism in cancer;Focal adhesion;Osteoclast differentiation;Efferocytosis;Chemokine signaling…	COG1100	O:Posttranslational modification, protein turnover, chaperones	PF00071.28;PF08477.19;PF00025.27	Ras;Roc;Arf	Ras family;Ras of Complex, Roc, domain of DAPkinase;ADP-ribosylation factor family	cytoplasmic
ENSP00000300161.4	YWHAB	14-3-3 protein beta/alpha	7529	pep chromosome:GRCh38:20:44885705:44908532:1 gene:ENSG00000166913.13 transcript:ENST00000353703.9 gene_biotype:protein_coding transcript_biotype:protein_coding gene_symbol:YWHAB description:tyrosine 3-monooxygenase/tryptophan 5-monooxygenase activation protein beta [Source:HGNC Symbol;Acc:HGNC:12849]	2.0529	1.0377	0.04873	up	yes	1517.64	739.269	1163.09	1055.6	398.365	597.263	354.806	866.489	1666.48	2649.1	2038.45	1186.6	1148.63	416.583	BP:protein localization;BP:negative regulation of response to stimulus;BP:regulation of signaling;BP:negative regulation of signaling;BP:cytoplasmic sequestering of protein;BP:regulation of cell communication;BP:negative regulation of signal transduction;BP:cellular macromolecule localization;BP:regulation of signal transduction;BP:regulation of biological process;BP:negative regulation of G-prot…	GO:0008104;GO:0048585;GO:0023051;GO:0023057;GO:0051220;GO:0010646;GO:0009968;GO:0070727;GO:0009966;GO:0050789;GO:0045744;GO:0065007;GO:0048519;GO:0033036;GO:0007165;GO:0048583;GO:0009987;GO:0006605;GO:0045184;GO:0035308;GO:0008150;GO:0051235;GO:0051234;GO:0051179;GO:0050794;GO:0051641;GO:0045185;GO:0008277;GO:0048523;GO:0010648GO:0048770;GO:0043229;GO:0043227;GO:0043226;GO:0005737;GO:0031982;GO:0…	K16197	YWHAB_Q_Z	hsa04110;hsa05203;hsa04390;hsa04114;hsa05160;hsa05161;hsa04151	Cell cycle;Viral carcinogenesis;Hippo signaling pathway;Oocyte meiosis;Hepatitis C;Hepatitis B;PI3K-Akt signaling pathway	COG5040	S:Function unknown	PF00244.26	14-3-3	14-3-3 protein	cytoplasmic
ENSP00000228825.7	ARPC3	Actin-related protein 2/3 complex subunit 3	10094	pep chromosome:GRCh38:12:110434823:110450337:-1 gene:ENSG00000111229.16 transcript:ENST00000228825.12 gene_biotype:protein_coding transcript_biotype:protein_coding gene_symbol:ARPC3 description:actin related protein 2/3 complex subunit 3 [Source:HGNC Symbol;Acc:HGNC:706]	2.1038	1.073	0.03495	up	yes	1492.73	709.544	1152.32	757.886	483.417	622.113	653.88	587.647	1754.56	2189.66	2410.77	966.243	1159.84	475.327	BP:regulation of organelle organization;BP:regulation of cellular component organization;BP:regulation of actin polymerization or depolymerization;BP:regulation of biological process;BP:cellular component organization or biogenesis;BP:regulation of actin filament length;BP:regulation of actin filament polymerization;BP:actin nucleation;BP:fibril organization;BP:regulation of cytoskeleton organiza…	GO:0033043;GO:0051128;GO:0008064;GO:0050789;GO:0071840;GO:0030832;GO:0030833;GO:0045010;GO:0097435;GO:0051493;GO:0016043;GO:0090066;GO:0065007;GO:0032271;GO:0065008;GO:0032970;GO:0009987;GO:0050794;GO:0008150;GO:0032956;GO:0043254;GO:0007015;GO:1902903;GO:0044087;GO:0110053;GO:0032535;GO:0034314GO:0043229;GO:0090734;GO:0043227;GO:0005737;GO:0110165;GO:0043226;GO:0030027;GO:0120025;GO:0042995;GO:0…	K05756	ARPC3	hsa05132;hsa05131;hsa05130;hsa05135;hsa05100;hsa04530;hsa04144;hsa04666;hsa04810	Salmonella infection;Shigellosis;Pathogenic Escherichia coli infection;Yersinia infection;Bacterial invasion of epithelial cells;Tight junction;Endocytosis;Fc gamma R-mediated phagocytosis;Regulation of actin cytoskeleton	ENOG4111FTG	S:Function unknown	PF04062.19	P21-Arc	ARP2/3 complex ARPC3	cytoplasmic
ENSP00000445008.2	-	NAP1L1	-	pep chromosome:GRCh38:12:76048995:76084612:-1 gene:ENSG00000187109.15 transcript:ENST00000535020.6 gene_biotype:protein_coding transcript_biotype:protein_coding gene_symbol:NAP1L1 description:nucleosome assembly protein 1 like 1 [Source:HGNC Symbol;Acc:HGNC:7637]	2.1964	1.1351	0.03564	up	yes	1401.31	638.019	1070.49	622.61	352.844	638.442	719.599	424.126	1412.98	2347	2081.8	687.638	1359.19	519.273	BP:nucleosome organization;BP:regulation of cell proliferation;BP:metabolic process;BP:macromolecular complex subunit organization;BP:nucleic acid metabolic process;BP:cellular component assembly;BP:positive regulation of neurogenesis;BP:regulation of biological process;BP:cellular component organization or biogenesis;BP:regulation of neurogenesis;BP:chromatin organization;BP:cellular component o…	GO:0034728;GO:0042127;GO:0008152;GO:0043933;GO:0090304;GO:0022607;GO:0050769;GO:0050789;GO:0071840;GO:0050767;GO:0006325;GO:0016043;GO:0065003;GO:0044238;GO:0051960;GO:0065007;GO:0010720;GO:0065004;GO:0048518;GO:0006260;GO:2000177;GO:2000179;GO:0008284;GO:0071824;GO:0006338;GO:0006139;GO:0050793;GO:0009987;GO:0050794;GO:0045597;GO:0045595;GO:0008150;GO:0051239;GO:0007399;GO:0051094;GO:0006334;GO:…	K11279	NAP1L1, NRP	------	------	ENOG410XQN9	P:Inorganic ion transport and metabolism	PF00956.23	NAP	Nucleosome assembly protein	cytoplasmic
ENSP00000216962.3	PYGB	Glycogen phosphorylase, brain form	5834	pep chromosome:GRCh38:20:25248085:25298012:1 gene:ENSG00000100994.12 transcript:ENST00000216962.9 gene_biotype:protein_coding transcript_biotype:protein_coding gene_symbol:PYGB description:glycogen phosphorylase B [Source:HGNC Symbol;Acc:HGNC:9723]	2.1847	1.1274	0.02147	up	yes	1295.75	593.097	790.038	847.981	404.968	438.227	461.73	615.639	1231.71	2120.18	1820.22	1033.39	1149.97	419.051	BP:glucan catabolic process;BP:generation of precursor metabolites and energy;BP:glycogen catabolic process;BP:energy reserve metabolic process;BP:cellular process;BP:polysaccharide catabolic process;BP:biological_process;BP:metabolic process;BP:carbohydrate metabolic process;BP:catabolic process;BP:macromolecule catabolic process;BP:glucan metabolic process;BP:primary metabolic process;BP:energy…	GO:0009251;GO:0006091;GO:0005980;GO:0006112;GO:0009987;GO:0000272;GO:0008150;GO:0008152;GO:0005975;GO:0009056;GO:0009057;GO:0044042;GO:0044238;GO:0015980;GO:0005977;GO:0005976;GO:0016052;GO:0043170GO:0031974;GO:0035578;GO:0060205;GO:0043227;GO:0043226;GO:0005737;GO:0031983;GO:0070062;GO:0016020;GO:0005775;GO:0110165;GO:0034774;GO:1903561;GO:0031982;GO:0043230;GO:0043233;GO:0005575;GO:0070013;GO:0…	K00688	PYG, glgP	hsa01100;hsa04931;hsa04910;hsa00500;hsa04922;hsa04217	Metabolic pathways;Insulin resistance;Insulin signaling pathway;Starch and sucrose metabolism;Glucagon signaling pathway;Necroptosis	COG0058	G:Carbohydrate transport and metabolism	PF00343.26	Phosphorylase	Carbohydrate phosphorylase	cytoplasmic
ENSP00000398475.1	CAP1	Cyclase associated actin cytoskeleton regulatory protein 1	-	pep chromosome:GRCh38:1:40040323:40064558:1 gene:ENSG00000131236.18 transcript:ENST00000449311.5 gene_biotype:protein_coding transcript_biotype:protein_coding gene_symbol:CAP1 description:cyclase associated actin cytoskeleton regulatory protein 1 [Source:HGNC Symbol;Acc:HGNC:20040]	2.6214	1.3903	0.0383	up	yes	1304.62	497.677	750.851	439.913	464.656	511.576	507.041	312.025	966.736	2793.62	1591.11	761.126	1191.79	523.359	BP:cAMP-mediated signaling;BP:intracellular signal transduction;BP:anatomical structure morphogenesis;BP:regulation of biological process;BP:cellular component organization or biogenesis;BP:cell morphogenesis;BP:fibril organization;BP:cellular component organization;BP:biological regulation;BP:developmental process;BP:cellular process;BP:regulation of cellular process;BP:biological_process;BP:act…	GO:0019933;GO:0035556;GO:0009653;GO:0050789;GO:0071840;GO:0000902;GO:0097435;GO:0016043;GO:0065007;GO:0032502;GO:0009987;GO:0050794;GO:0008150;GO:0007015;GO:0007165GO:0005737;GO:0016020;GO:0110165;GO:0005886;GO:0005575GO:0019899;GO:0003674;GO:0005488;GO:0003779;GO:0008179;GO:0008092;GO:0005515	K17261	CAP1_2, SRV2	------	------	ENOG410XPXJ	S:Function unknown	PF21938.1;PF01213.24	CAP_N;CAP_N-CM	CAP, N-terminal domain;CAP N-terminal conserved motif	cytoplasmic
ENSP00000345079.2	CSRP1	Cysteine and glycine-rich protein 1	1465	pep chromosome:GRCh38:1:201483530:201507123:-1 gene:ENSG00000159176.14 transcript:ENST00000340006.7 gene_biotype:protein_coding transcript_biotype:protein_coding gene_symbol:CSRP1 description:cysteine and glycine rich protein 1 [Source:HGNC Symbol;Acc:HGNC:2469]	2.4805	1.3106	0.03084	up	yes	1133.95	457.139	851.861	548.283	338.207	162.8	588.201	253.482	1465.66	1392.8	1982.95	552.704	1059.21	350.386	BP:actomyosin structure organization;BP:actin cytoskeleton organization;BP:cellular component organization;BP:cellular component organization or biogenesis;BP:developmental process;BP:cellular process;BP:actin filament-based process;BP:cell-cell adhesion;BP:homotypic cell-cell adhesion;BP:tissue development;BP:sarcomere organization;BP:cell adhesion;BP:cytoskeleton organization;BP:organelle organ…	GO:0031032;GO:0030036;GO:0016043;GO:0071840;GO:0032502;GO:0009987;GO:0030029;GO:0098609;GO:0034109;GO:0009888;GO:0045214;GO:0007155;GO:0007010;GO:0006996;GO:0048856;GO:0060537;GO:0008150;GO:0070527GO:0043229;GO:0005925;GO:0043227;GO:0043226;GO:0030054;GO:0030055;GO:0005737;GO:0070062;GO:0005634;GO:0030018;GO:0110165;GO:0070161;GO:1903561;GO:0031982;GO:0043230;GO:0043231;GO:0005575;GO:0065010GO:00…	K09377	CSRP	hsa04820	Cytoskeleton in muscle cells	ENOG4111F3Y	O:Posttranslational modification, protein turnover, chaperones	PF00412.28	LIM	LIM domain	cytoplasmic
ENSP00000325240.6	LASP1	LIM and SH3 domain protein 1	3927	pep chromosome:GRCh38:17:38870058:38921770:1 gene:ENSG00000002834.19 transcript:ENST00000318008.11 gene_biotype:protein_coding transcript_biotype:protein_coding gene_symbol:LASP1 description:LIM and SH3 protein 1 [Source:HGNC Symbol;Acc:HGNC:6513]	2.0935	1.0659	0.03616	up	yes	1071.04	511.592	828.537	699.196	260.627	471.342	484.11	325.74	1299.13	1784.07	1354.88	723.997	966.018	298.152	BP:ion transport;BP:transport;BP:biological_process;BP:establishment of localization;BP:localizationCC:intracellular organelle;CC:non-membrane-bounded organelle;CC:focal adhesion;CC:organelle;CC:cell junction;CC:cell-substrate junction;CC:cytoplasm;CC:cellular anatomical entity;CC:cytoskeleton;CC:anchoring junction;CC:cell cortex;CC:intracellular non-membrane-bounded organelle;CC:cortical cytoske…	GO:0006811;GO:0006810;GO:0008150;GO:0051234;GO:0051179GO:0043229;GO:0043228;GO:0005925;GO:0043226;GO:0030054;GO:0030055;GO:0005737;GO:0110165;GO:0005856;GO:0070161;GO:0005938;GO:0043232;GO:0030863;GO:0030864;GO:0005575GO:0003674;GO:0005488;GO:0015075;GO:0050839;GO:0043167;GO:0003779;GO:0046872;GO:0043169;GO:0005215;GO:0051015;GO:0036094;GO:0008092;GO:0045296;GO:0022857;GO:0005515;GO:0044877	K24420	LASP1	------	------	ENOG4111GQ8	S:Function unknown	PF00880.23;PF14604.12;PF00018.34;PF00412.28;PF07653.23	Nebulin;SH3_9;SH3_1;LIM;SH3_2	Nebulin repeat;Variant SH3 domain;SH3 domain;LIM domain;Variant SH3 domain	cytoplasmic
ENSP00000397182.3	TFG	Trafficking from ER to golgi regulator	-	pep chromosome:GRCh38:3:100709353:100748964:1 gene:ENSG00000114354.15 transcript:ENST00000418917.7 gene_biotype:protein_coding transcript_biotype:protein_coding gene_symbol:TFG description:trafficking from ER to golgi regulator [Source:HGNC Symbol;Acc:HGNC:11758]	0.3627	-1.4632	0.003411	down	yes	409.677	1129.55	1458.4008832725	1654.9311775292	1222.8343114845	905.25491567531	1033.7741687884	502.124	681.747	124.837	563.116	516.946	318.688	252.72790330184	BP:COPII vesicle coating;BP:organelle organization;BP:cellular component assembly;BP:macromolecular complex subunit organization;BP:cellular process;BP:vesicle coating;BP:vesicle organization;BP:macromolecular complex assembly;BP:biological_process;BP:cellular component organization;BP:cellular component organization or biogenesisCC:cellular_component;CC:cellular anatomical entity;CC:endoplasmic …	GO:0048208;GO:0006996;GO:0022607;GO:0043933;GO:0009987;GO:0006901;GO:0016050;GO:0065003;GO:0008150;GO:0016043;GO:0071840GO:0005575;GO:0110165;GO:0070971GO:0003674;GO:0042802;GO:0005515;GO:0005488	K09292	TFG	hsa05216;hsa05200	Thyroid cancer;Pathways in cancer	ENOG410Z8FQ	S:Function unknown	PF00564.30	PB1	PB1 domain	cytoplasmic
ENSP00000445874.1	BIN2	Bridging integrator 2	51411	pep chromosome:GRCh38:12:51281282:51324668:-1 gene:ENSG00000110934.13 transcript:ENST00000544402.5 gene_biotype:protein_coding transcript_biotype:protein_coding gene_symbol:BIN2 description:bridging integrator 2 [Source:HGNC Symbol;Acc:HGNC:1053]	2.0072	1.0052	0.03979	up	yes	1015.19	505.784	908.616	357.879	355.099	423.138	521.633	468.337	1157.4	1445	1431.3	529.413	1232.68	295.359	BP:cellular component assembly;BP:macromolecular complex subunit organization;BP:membrane organization;BP:cell chemotaxis;BP:cellular component organization or biogenesis;BP:podosome assembly;BP:taxis;BP:cellular component organization;BP:macromolecular complex assembly;BP:plasma membrane organization;BP:cell migration;BP:locomotion;BP:chemotaxis;BP:cellular process;BP:phagocytosis, engulfment;BP…	GO:0022607;GO:0043933;GO:0061024;GO:0060326;GO:0071840;GO:0071800;GO:0042330;GO:0016043;GO:0065003;GO:0007009;GO:0016477;GO:0040011;GO:0006935;GO:0009987;GO:0006911;GO:0008150;GO:0070925;GO:0006996;GO:0048870;GO:0099024;GO:0010324;GO:0097320GO:0042995;GO:0034774;GO:0031974;GO:1904813;GO:0043229;GO:0043228;GO:0043226;GO:0005737;GO:0016020;GO:0002102;GO:0031983;GO:0005576;GO:0030054;GO:0110165;GO:0…	K20119	BIN2	------	------	ENOG410Y56Y	Z:Cytoskeleton	PF21532.2;PF03114.23	Bin2_C;BAR	Bridging integrator 2, C-terminal tail;BAR domain	cytoplasmic
ENSP00000245932.5	VASP	Vasodilator-stimulated phosphoprotein	7408	pep chromosome:GRCh38:19:45507479:45526983:1 gene:ENSG00000125753.15 transcript:ENST00000245932.11 gene_biotype:protein_coding transcript_biotype:protein_coding gene_symbol:VASP description:vasodilator stimulated phosphoprotein [Source:HGNC Symbol;Acc:HGNC:12652]	2.0966	1.0681	0.03187	up	yes	955.316	455.654	854.729	460.805	365.915	425.779	383.119	243.575	1036.51	1441.77	1393.28	675.182	917.215	267.937	BP:tube formation;BP:protein homotetramerization;BP:regulation of actin polymerization or depolymerization;BP:neuron projection guidance;BP:positive regulation of cytoskeleton organization;BP:regulation of cytoskeleton organization;BP:positive regulation of biological process;BP:positive regulation of organelle organization;BP:anatomical structure formation involved in morphogenesis;BP:regulation…	GO:0035148;GO:0051289;GO:0008064;GO:0097485;GO:0051495;GO:0051493;GO:0048518;GO:0010638;GO:0048646;GO:0032535;GO:0022607;GO:0031175;GO:0120036;GO:0050789;GO:0016043;GO:0090066;GO:0065003;GO:0065007;GO:0071840;GO:0001843;GO:0065008;GO:0051130;GO:0050794;GO:0008154;GO:0008150;GO:0032956;GO:0043254;GO:0060606;GO:0110053;GO:0033043;GO:0051128;GO:0007411;GO:0097435;GO:0030030;GO:0032271;GO:0032273;GO:…	K06274	VASP	hsa04611;hsa04666;hsa04022;hsa04530;hsa04015;hsa04670;hsa04510	Platelet activation;Fc gamma R-mediated phagocytosis;cGMP-PKG signaling pathway;Tight junction;Rap1 signaling pathway;Leukocyte transendothelial migration;Focal adhesion	ENOG41101TS	U:Intracellular trafficking, secretion, and vesicular transport	PF00568.29;PF08776.16	WH1;VASP_tetra	WH1 domain;VASP tetramerisation domain	cytoplasmic
ENSP00000481908.1	HSP90AB1	Heat shock protein HSP 90-beta	3326	pep chromosome:GRCh38:6:44246166:44253888:1 gene:ENSG00000096384.20 transcript:ENST00000620073.4 gene_biotype:protein_coding transcript_biotype:protein_coding gene_symbol:HSP90AB1 description:heat shock protein 90 alpha family class B member 1 [Source:HGNC Symbol;Acc:HGNC:5258]	2.0929	1.0655	0.02723	up	yes	902.401	431.174	593.026	554.647	331.964	446.479	314.242	346.685	992.387	1152.42	1519.28	488.514	909.705	352.097	BP:regulation of primary metabolic process;BP:regulation of proteasomal ubiquitin-dependent protein catabolic process;BP:negative regulation of proteasomal ubiquitin-dependent protein catabolic process;BP:cellular response to heat;BP:positive regulation of response to stimulus;BP:cellular component organization or biogenesis;BP:telomere maintenance via telomerase;BP:cellular response to stimulus;…	GO:0080090;GO:0032434;GO:0032435;GO:0034605;GO:0048584;GO:0071840;GO:0007004;GO:0051716;GO:0010605;GO:0019222;GO:0009966;GO:0009967;GO:0044419;GO:0042981;GO:0044650;GO:0080164;GO:1901799;GO:0048518;GO:0048519;GO:0022607;GO:0060255;GO:0030162;GO:0051701;GO:0030511;GO:0006278;GO:0019538;GO:0051094;GO:0045429;GO:0045428;GO:0033554;GO:2000008;GO:1901873;GO:0009894;GO:0009895;GO:0006457;GO:0009893;GO:…	K04079	HSP90A, htpG	hsa04659;hsa05132;hsa04612;hsa05207;hsa04621;hsa04657;hsa05200;hsa04141;hsa05418;hsa04914;hsa04915;hsa04151;hsa05215;hsa04217;hsa05417	Th17 cell differentiation;Salmonella infection;Antigen processing and presentation;Chemical carcinogenesis - receptor activation;NOD-like receptor signaling pathway;IL-17 signaling pathway;Pathways in cancer;Protein processing in endoplasmic reticulum;Fluid shear stress and atherosclerosis;Progesterone-mediated oocyte maturation;Estrogen signaling pathway;PI3K-Akt signaling pathway;Prostate cance…	COG0326	O:Posttranslational modification, protein turnover, chaperones	PF00183.23;PF13589.12;PF02518.31	HSP90;HATPase_c_3;HATPase_c	Hsp90 protein;Histidine kinase-, DNA gyrase B-, and HSP90-like ATPase;Histidine kinase-, DNA gyrase B-, and HSP90-like ATPase	cytoplasmic
ENSP00000263097.2	CNN2	Calponin-2	1265	pep chromosome:GRCh38:19:1026608:1039065:1 gene:ENSG00000064666.15 transcript:ENST00000263097.9 gene_biotype:protein_coding transcript_biotype:protein_coding gene_symbol:CNN2 description:calponin 2 [Source:HGNC Symbol;Acc:HGNC:2156]	2.5803	1.3675	0.03077	up	yes	944.67	366.104	742.638	299.533	238.129	388.443	277.575	250.303	976.242	1602.69	1491.61	573.832	795.492	228.154	BP:actomyosin structure organization;BP:cellular response to mechanical stimulus;BP:actin cytoskeleton organization;BP:response to mechanical stimulus;BP:regulation of biological process;BP:cellular component organization or biogenesis;BP:cellular response to stimulus;BP:fibril organization;BP:cellular component organization;BP:biological regulation;BP:regulation of actin filament-based process;B…	GO:0031032;GO:0071260;GO:0030036;GO:0009612;GO:0050789;GO:0071840;GO:0051716;GO:0097435;GO:0016043;GO:0065007;GO:0032970;GO:0071214;GO:0071496;GO:0030029;GO:0009628;GO:0009987;GO:0050794;GO:0008150;GO:0104004;GO:0006996;GO:0007015;GO:0007010;GO:0009605;GO:0050896GO:0032432;GO:0030055;GO:0043226;GO:0043229;GO:0043228;GO:0070161;GO:0005925;GO:0042641;GO:0005856;GO:0001725;GO:0097517;GO:0030054;GO:0…	------	------	------	------	COG5199	O:Posttranslational modification, protein turnover, chaperones	PF00402.23;PF00307.36	Calponin;CH	Calponin family repeat;Calponin homology	cytoplasmic
ENSP00000305556.5	PCBP1	Poly(rC)-binding protein 1	5093	pep chromosome:GRCh38:2:70087477:70089203:1 gene:ENSG00000169564.7 transcript:ENST00000303577.7 gene_biotype:protein_coding transcript_biotype:protein_coding gene_symbol:PCBP1 description:poly(rC) binding protein 1 [Source:HGNC Symbol;Acc:HGNC:8647]	2.2248	1.1537	0.03059	up	yes	869.488	390.825	534.212	389.74	147.545	647.028	415.913	210.509	662.593	1520	1178.61	751.799	807.039	296.888	BP:regulation of RNA metabolic process;BP:RNA biosynthetic process;BP:regulation of metabolic process;BP:positive regulation of biosynthetic process;BP:positive regulation of macromolecule metabolic process;BP:positive regulation of RNA metabolic process;BP:nucleic acid metabolic process;BP:regulation of primary metabolic process;BP:nucleobase-containing compound metabolic process;BP:regulation o…	GO:0051252;GO:0032774;GO:0019222;GO:0009891;GO:0010604;GO:0051254;GO:0090304;GO:0080090;GO:0006139;GO:0010468;GO:0050789;GO:0010556;GO:0048518;GO:0065007;GO:1902680;GO:0045935;GO:0019079;GO:0009987;GO:0009889;GO:0050794;GO:0009058;GO:0009059;GO:0008150;GO:0045893;GO:0008152;GO:2001141;GO:0034654;GO:0009893;GO:0016070;GO:0044238;GO:0060255;GO:0039694;GO:0019219;GO:0043170;GO:0006355;GO:0010557;GO:…	K12889	PCBP1	hsa04216;hsa03040;hsa04623	Ferroptosis;Spliceosome;Cytosolic DNA-sensing pathway	ENOG410XNN8	Q:Secondary metabolites biosynthesis, transport and catabolism	PF00013.35;PF07650.23;PF22675.2;PF13083.13	KH_1;KH_2;KH-I_KHDC4-BBP;KH_KhpA-B	KH domain;KH domain;KHDC4/BBP-like, KH-domain type I;KhpA/KhpB, KH domain	cytoplasmic
ENSP00000365757.4	PIP4K2A	Phosphatidylinositol 5-phosphate 4-kinase type-2 alpha	5305	pep chromosome:GRCh38:10:22534854:22714578:-1 gene:ENSG00000150867.14 transcript:ENST00000376573.9 gene_biotype:protein_coding transcript_biotype:protein_coding gene_symbol:PIP4K2A description:phosphatidylinositol-5-phosphate 4-kinase type 2 alpha [Source:HGNC Symbol;Acc:HGNC:8997]	2.1782	1.1231	0.04674	up	yes	823.731	378.176	761.862	346.457	175.241	317.267	353.694	314.535	1038.06	1265.87	1311.92	471.77	572.887	281.886	BP:regulation of metabolic process;BP:negative regulation of response to stimulus;BP:vesicle fusion;BP:cell development;BP:membrane fusion;BP:membrane organization;BP:autophagosome-lysosome fusion;BP:cellular component organization or biogenesis;BP:negative regulation of signal transduction;BP:regulation of signal transduction;BP:cellular developmental process;BP:regulation of organelle organizat…	GO:0019222;GO:0048585;GO:0006906;GO:0048468;GO:0061025;GO:0061024;GO:0061909;GO:0071840;GO:0009968;GO:0009966;GO:0048869;GO:0033043;GO:0044090;GO:0048518;GO:0006661;GO:0048583;GO:0046488;GO:0046486;GO:0051128;GO:0016192;GO:0090174;GO:0010638;GO:0016050;GO:1900077;GO:1900076;GO:0019637;GO:0009896;GO:0009894;GO:0009893;GO:0015918;GO:0015850;GO:0016043;GO:0035855;GO:0065007;GO:0046854;GO:0051130;GO:…	K00920	PIP4K2	hsa00562;hsa01100;hsa04070;hsa04810	Inositol phosphate metabolism;Metabolic pathways;Phosphatidylinositol signaling system;Regulation of actin cytoskeleton	COG5253	T:Signal transduction mechanisms	PF01504.24	PIP5K	Phosphatidylinositol-4-phosphate 5-Kinase	cytoplasmic
ENSP00000326010.9	PTPN6	Tyrosine-protein phosphatase non-receptor type 6	5777	pep chromosome:GRCh38:12:6951356:6961316:1 gene:ENSG00000111679.17 transcript:ENST00000318974.14 gene_biotype:protein_coding transcript_biotype:protein_coding gene_symbol:PTPN6 description:protein tyrosine phosphatase non-receptor type 6 [Source:HGNC Symbol;Acc:HGNC:9658]	2.0244	1.0175	0.04318	up	yes	795.615	393.006	598.744	437.493	261.424	374.425	441.344	244.606	926.336	986.199	1397.99	380.121	768.949	314.099	BP:negative regulation of T cell proliferation;BP:regulation of cell adhesion mediated by integrin;BP:regulation of phosphate metabolic process;BP:regulation of primary metabolic process;BP:regulation of metabolic process;BP:regulation of cell cycle process;BP:regulation of transport;BP:negative regulation of response to stimulus;BP:positive regulation of response to stimulus;BP:regulation of seq…	GO:0042130;GO:0033628;GO:0019220;GO:0080090;GO:0019222;GO:0010564;GO:0051049;GO:0048585;GO:0048584;GO:0051282;GO:0030220;GO:0002707;GO:0002706;GO:0007162;GO:0002704;GO:0002703;GO:0007165;GO:0007166;GO:0034765;GO:0051897;GO:0051896;GO:0034762;GO:0019221;GO:1902806;GO:0070661;GO:0050728;GO:0010605;GO:0009968;GO:0045785;GO:0009966;GO:0048869;GO:0018212;GO:0050727;GO:0018193;GO:0044419;GO:0006470;GO:…	K05697	PTPN6, SHP1	hsa05130;hsa05205;hsa04650;hsa04662;hsa04630;hsa04660;hsa05235;hsa05140;hsa04520;hsa04148	Pathogenic Escherichia coli infection;Proteoglycans in cancer;Natural killer cell mediated cytotoxicity;B cell receptor signaling pathway;JAK-STAT signaling pathway;T cell receptor signaling pathway;PD-L1 expression and PD-1 checkpoint pathway in cancer;Leishmaniasis;Adherens junction;Efferocytosis	COG5599	G:Carbohydrate transport and metabolism	PF00102.32;PF00017.30;PF22784.1	Y_phosphatase;SH2;PTP-SAK	Protein-tyrosine phosphatase;SH2 domain;Swiss Army Knife protein, DSP-PTPase phosphatase domain	cytoplasmic
ENSP00000387890.2	PLS1	Plastin-1	5357	pep chromosome:GRCh38:3:142596393:142713664:1 gene:ENSG00000120756.13 transcript:ENST00000457734.7 gene_biotype:protein_coding transcript_biotype:protein_coding gene_symbol:PLS1 description:plastin 1 [Source:HGNC Symbol;Acc:HGNC:9090]	2.6136	1.386	0.004227	up	yes	854.566	326.969	388.807	490.932	231.964	114.448	57.3055	678.36	1045.52	1088.72	768.114	1001.08	831.855	392.107	BP:auditory receptor cell stereocilium organization;BP:regulation of cell projection organization;BP:cellular component organization or biogenesis;BP:positive regulation of biological process;BP:system process;BP:intestinal hexose absorption;BP:regulation of biological quality;BP:regulation of microvillus length;BP:regulation of microvillus organization;BP:regulation of cell projection size;BP:re…	GO:0060088;GO:0031344;GO:0071840;GO:0048518;GO:0003008;GO:0106001;GO:0065008;GO:0032532;GO:0032530;GO:0032536;GO:0032535;GO:0022607;GO:0022600;GO:0031175;GO:0120036;GO:0120035;GO:1902896;GO:0016043;GO:0090066;GO:0065007;GO:0032880;GO:0050793;GO:0050794;GO:0008150;GO:0051239;GO:0030866;GO:0030865;GO:0097435;GO:0048639;GO:0048638;GO:0061572;GO:0051128;GO:1903829;GO:0045927;GO:0070925;GO:0051240;GO:…	K17275	PLS1	------	------	COG5069	S:Function unknown	PF00307.36;PF13499.12;PF00036.39;PF13405.12;PF13833.12;PF13202.12	CH;EF-hand_7;EF-hand_1;EF-hand_6;EF-hand_8;EF-hand_5	Calponin homology;EF-hand domain pair;EF hand domain;EF-hand domain;EF-hand domain pair;EF hand	cytoplasmic
ENSP00000501618.1	RAB7A	Ras-related protein Rab-7a	7879	pep chromosome:GRCh38:3:128693669:128814797:1 gene:ENSG00000075785.14 transcript:ENST00000676214.1 gene_biotype:protein_coding transcript_biotype:protein_coding gene_symbol:RAB7A description:RAB7A, member RAS oncogene family [Source:HGNC Symbol;Acc:HGNC:9788]	2.0161	1.0116	0.03516	up	yes	761.257	377.58	463.927	426.352	191.877	327.298	504.472	351.553	825.818	1103.81	1208.26	485.782	713.523	230.354	BP:protein localization to vacuole;BP:protein localization;BP:regulation of primary metabolic process;BP:regulation of metabolic process;BP:anatomical structure homeostasis;BP:negative regulation of secretion;BP:protein catabolic process;BP:negative regulation of response to stimulus;BP:vesicle fusion;BP:tissue homeostasis;BP:negative regulation of organelle organization;BP:regulation of signal t…	GO:0072665;GO:0008104;GO:0080090;GO:0019222;GO:0060249;GO:0051048;GO:0030163;GO:0048585;GO:0006906;GO:0001894;GO:0010639;GO:0009966;GO:0051656;GO:0051650;GO:0071840;GO:0048524;GO:0043207;GO:0070727;GO:1903541;GO:0044419;GO:0051049;GO:0048518;GO:0048519;GO:0033036;GO:0019725;GO:0051050;GO:0060255;GO:0048583;GO:0006623;GO:0006605;GO:0045184;GO:0007174;GO:0061919;GO:0072657;GO:0051668;GO:0051701;GO:…	K07897	RAB7A	hsa05132;hsa04140;hsa04137;hsa04145;hsa04144;hsa05152;hsa04148;hsa05146	Salmonella infection;Autophagy - animal;Mitophagy - animal;Phagosome;Endocytosis;Tuberculosis;Efferocytosis;Amoebiasis	ENOG410XNZV	S:Function unknown	PF00071.28;PF08477.19;PF00025.27;PF01926.29;PF00009.33;PF03193.22;PF04670.18	Ras;Roc;Arf;MMR_HSR1;GTP_EFTU;RsgA_GTPase;Gtr1_RagA	Ras family;Ras of Complex, Roc, domain of DAPkinase;ADP-ribosylation factor family;50S ribosome-binding GTPase;Elongation factor Tu GTP binding domain;RsgA GTPase;Gtr1/RagA G protein conserved region	cytoplasmic
ENSP00000344868.8	-	SEPTIN7	-	pep chromosome:GRCh38:7:35801057:35907110:1 gene:ENSG00000122545.22 transcript:ENST00000350320.11 gene_biotype:protein_coding transcript_biotype:protein_coding gene_symbol:SEPTIN7 description:septin 7 [Source:HGNC Symbol;Acc:HGNC:1717]	2.0786	1.0556	0.01922	up	yes	700.161	336.851	636.722	329.505	238.706	335.479	229.549	251.143	690.613	939.007	1092.99	582.386	587.233	308.731	BP:cellular component assembly;BP:cell projection organization;BP:cell projection assembly;BP:cytoskeleton-dependent cytokinesis;BP:plasma membrane bounded cell projection organization;BP:cellular component organization or biogenesis;BP:plasma membrane bounded cell projection assembly;BP:reproductive process;BP:cell cycle process;BP:cellular component organization;BP:gamete generation;BP:multicel…	GO:0022607;GO:0030030;GO:0030031;GO:0061640;GO:0120036;GO:0071840;GO:0120031;GO:0022414;GO:0022402;GO:0016043;GO:0007276;GO:0048609;GO:0060271;GO:0009987;GO:0007283;GO:0008150;GO:0048232;GO:0070925;GO:0006996;GO:0003006;GO:0000910;GO:0044782;GO:0032502GO:0098590;GO:0043229;GO:0043228;GO:0005929;GO:0043227;GO:0043226;GO:0005856;GO:0099080;GO:0042995;GO:0005940;GO:0031514;GO:0016020;GO:0110165;GO:0…	K16944	SEPT7, CDC3	hsa05131	Shigellosis	COG5019;COG5019	D:Cell cycle control, cell division, chromosome partitioning;Z:Cytoskeleton	PF00735.24;PF01926.29	Septin;MMR_HSR1	Septin;50S ribosome-binding GTPase	cytoplasmic
ENSP00000517782.1	KRT33A	Keratin, type I cuticular Ha3-I	3883	pep scaffold:GRCh38:HSCHR17_13_CTG4:285996:290732:-1 gene:ENSG00000292027.1 transcript:ENST00000709590.1 gene_biotype:protein_coding transcript_biotype:protein_coding gene_symbol:KRT33A description:keratin 33A [Source:HGNC Symbol;Acc:HGNC:6450]	10285.9	13.3284	0.002132	up	yes	1028.59	0.1	0.1	0.1	0.1	0.1	0.1	0.1	1398.4	181.285	1992.23	762.15728494848	863.501	973.95676329079	BP:cell differentiation;BP:cellular component organization or biogenesis;BP:cellular developmental process;BP:fibril organization;BP:cellular component organization;BP:epithelial cell differentiation;BP:developmental process;BP:cellular process;BP:biological_process;BP:organelle organization;BP:cytoskeleton organization;BP:intermediate filament organization;BP:intermediate filament cytoskeleton o…	GO:0030154;GO:0071840;GO:0048869;GO:0097435;GO:0016043;GO:0030855;GO:0032502;GO:0009987;GO:0008150;GO:0006996;GO:0007010;GO:0045109;GO:0045104;GO:0045103GO:0099512;GO:0099513;GO:0043229;GO:0043228;GO:0043226;GO:0005856;GO:0005575;GO:0005615;GO:0110165;GO:0005882;GO:0043232;GO:0005829;GO:0099080;GO:0099081GO:0003674;GO:0005198	K07604	KRT1	hsa05150;hsa04915	Staphylococcus aureus infection;Estrogen signaling pathway	ENOG410YK2A	O:Posttranslational modification, protein turnover, chaperones	PF00038.26	Filament	Intermediate filament protein	mitochondrial
ENSP00000264265.3	LXN	Latexin	56925	pep chromosome:GRCh38:3:158666414:158672648:-1 gene:ENSG00000079257.8 transcript:ENST00000264265.4 gene_biotype:protein_coding transcript_biotype:protein_coding gene_symbol:LXN description:latexin [Source:HGNC Symbol;Acc:HGNC:13347]	5.1858	2.3746	0.003286	up	yes	845.345	163.012	0.1	977.57	0.1	0.1	0.1	0.1	533.237	822.44	1051.53	855.534	956.307	853.019	BP:inflammatory response;BP:detection of temperature stimulus involved in sensory perception;BP:detection of external stimulus;BP:detection of temperature stimulus involved in sensory perception of pain;BP:detection of abiotic stimulus;BP:defense response;BP:response to stress;BP:biological_process;BP:response to temperature stimulus;BP:detection of temperature stimulus;BP:response to abiotic sti…	GO:0006954;GO:0050961;GO:0009581;GO:0050965;GO:0009582;GO:0006952;GO:0006950;GO:0008150;GO:0009266;GO:0016048;GO:0009628;GO:0051606;GO:0009605;GO:0050896;GO:0062149;GO:0050906GO:0005737;GO:0005575;GO:0005615;GO:0110165GO:0004866;GO:0003674;GO:0005488;GO:0004857;GO:0098772;GO:0061135;GO:1901681;GO:0030234;GO:0061134;GO:0030414;GO:0008191;GO:0008201;GO:0097367;GO:0005539	K23594	LXN	------	------	ENOG4111KGW	S:Function unknown	PF06907.18	LXN	Latexin	cytoplasmic
ENSP00000266481.6	DNM1L	Dynamin-1-like protein	10059	pep chromosome:GRCh38:12:32679303:32744350:1 gene:ENSG00000087470.21 transcript:ENST00000266481.10 gene_biotype:protein_coding transcript_biotype:protein_coding gene_symbol:DNM1L description:dynamin 1 like [Source:HGNC Symbol;Acc:HGNC:2973]	2.1961	1.1349	0.03228	up	yes	658.677	299.931	400.663	228.394	187.428	318.2	412.168	252.73	657.733	890.992	1209.42	497.169	404.51	292.244	BP:positive regulation of apoptotic signaling pathway;BP:protein localization;BP:regulation of metabolic process;BP:regulation of apoptotic signaling pathway;BP:regulation of transport;BP:positive regulation of response to stimulus;BP:regulation of response to stimulus;BP:membrane fusion;BP:membrane organization;BP:circulatory system process;BP:regulation of chemotaxis;BP:heart process;BP:establi…	GO:2001235;GO:0008104;GO:0019222;GO:2001233;GO:0051049;GO:0048584;GO:0048583;GO:0061025;GO:0061024;GO:0003013;GO:0050920;GO:0003015;GO:0051654;GO:0051656;GO:0007005;GO:0043065;GO:0051046;GO:0043207;GO:0070727;GO:0009966;GO:0043653;GO:0044419;GO:1900063;GO:0048518;GO:0002682;GO:0033036;GO:0016192;GO:0051050;GO:0060255;GO:0051707;GO:0003008;GO:0070585;GO:0009607;GO:0009605;GO:0010638;GO:0010468;GO:…	K17065	DNM1L	hsa04668;hsa04621;hsa04217	TNF signaling pathway;NOD-like receptor signaling pathway;Necroptosis	COG0699	S:Function unknown	PF01031.25;PF00350.29;PF02212.23	Dynamin_M;Dynamin_N;GED	Dynamin central region;Dynamin family;Dynamin GTPase effector domain	cytoplasmic
ENSP00000512221.1	-	-	-	pep chromosome:GRCh38:1:22025511:22092943:1 gene:ENSG00000289694.1 transcript:ENST00000695856.1 gene_biotype:protein_coding transcript_biotype:protein_coding description:novel protein	2.3574	1.2372	0.03199	up	yes	652.941	276.974	428.259	140.614	153.165	372.606	372.425	194.777	586.391	727.543	1288.15	428.09	602.648	284.823	BP:cell-cell junction organization;BP:regulation of cell projection assembly;BP:establishment or maintenance of cell polarity;BP:signal transduction;BP:positive regulation of biological process;BP:cardiac conduction system development;BP:vesicle-mediated transport;BP:intracellular signal transduction;BP:regulation of plasma membrane bounded cell projection organization;BP:regulation of biological…	GO:0045216;GO:0060491;GO:0007163;GO:0007165;GO:0048518;GO:0003161;GO:0016192;GO:0035556;GO:0120035;GO:0050789;GO:0016043;GO:0031344;GO:0065007;GO:0071840;GO:0051130;GO:0006810;GO:0050794;GO:0120032;GO:0008150;GO:0032488;GO:0006897;GO:0050808;GO:0051128;GO:0009653;GO:0051234;GO:0097435;GO:0032502;GO:0007015;GO:0009987;GO:0090135;GO:0048738;GO:0034332;GO:0034330;GO:0030036;GO:0014706;GO:0051301;GO:…	K04393	CDC42	hsa05132;hsa05131;hsa05130;hsa05135;hsa05212;hsa05211;hsa04530;hsa04670;hsa04144;hsa04510;hsa04722;hsa04062;hsa05417;hsa04370;hsa05165;hsa04933;hsa05120;hsa05100;hsa05205;hsa05200;hsa05203;hsa04660;hsa04015;hsa04520;hsa04666;hsa04010;hsa04932;hsa04810;hsa04912;hsa04014;hsa04360	Salmonella infection;Shigellosis;Pathogenic Escherichia coli infection;Yersinia infection;Pancreatic cancer;Renal cell carcinoma;Tight junction;Leukocyte transendothelial migration;Endocytosis;Focal adhesion;Neurotrophin signaling pathway;Chemokine signaling pathway;Lipid and atherosclerosis;VEGF signaling pathway;Human papillomavirus infection;AGE-RAGE signaling pathway in diabetic complications…	COG1100	S:Function unknown	PF00071.28;PF08477.19;PF00025.27	Ras;Roc;Arf	Ras family;Ras of Complex, Roc, domain of DAPkinase;ADP-ribosylation factor family	cytoplasmic
ENSP00000358633.2	G6PD	Glucose-6-phosphate 1-dehydrogenase	2539	pep chromosome:GRCh38:X:154532000:154547572:-1 gene:ENSG00000160211.20 transcript:ENST00000369620.6 gene_biotype:protein_coding transcript_biotype:protein_coding gene_symbol:G6PD description:glucose-6-phosphate dehydrogenase [Source:HGNC Symbol;Acc:HGNC:4057]	2.3036	1.2039	0.03482	up	yes	626.585	271.999	494.699	288.045	122.407	247.751	245.494	233.598	810.877	1128.42	749.226	336.91	506.436	227.644	BP:regulation of primary metabolic process;BP:regulation of metabolic process;BP:regulation of transport;BP:response to iron ion;BP:regulation of response to stimulus;BP:cell maturation;BP:regulation of neuron apoptotic process;BP:small molecule metabolic process;BP:small molecule biosynthetic process;BP:positive regulation of transmembrane transport;BP:regulation of ion transmembrane transport;B…	GO:0080090;GO:0019222;GO:0051049;GO:0010039;GO:0048583;GO:0048469;GO:0043523;GO:0044281;GO:0044283;GO:0034764;GO:0034765;GO:0010041;GO:0034767;GO:0034762;GO:0051716;GO:0010605;GO:0048869;GO:0042981;GO:0061052;GO:0048518;GO:0048519;GO:0051050;GO:0060255;GO:1902653;GO:1902652;GO:0010038;GO:1904427;GO:0071695;GO:0006575;GO:0031667;GO:0016051;GO:0006163;GO:0010734;GO:0033554;GO:0010732;GO:0019637;GO:…	K00036	G6PD, zwf	hsa00030;hsa01100;hsa01200;hsa00480;hsa05230;hsa05415	Pentose phosphate pathway;Metabolic pathways;Carbon metabolism;Glutathione metabolism;Central carbon metabolism in cancer;Diabetic cardiomyopathy	COG0364	S:Function unknown	PF02781.21;PF00479.28	G6PD_C;G6PD_N	Glucose-6-phosphate dehydrogenase, C-terminal domain;Glucose-6-phosphate dehydrogenase, NAD binding domain	cytoplasmic
ENSP00000246533.2	CAPNS1	Calpain small subunit 1	826	pep chromosome:GRCh38:19:36140066:36150353:1 gene:ENSG00000126247.11 transcript:ENST00000246533.8 gene_biotype:protein_coding transcript_biotype:protein_coding gene_symbol:CAPNS1 description:calpain small subunit 1 [Source:HGNC Symbol;Acc:HGNC:1481]	2.1807	1.1248	0.0245	up	yes	613.802	281.471	470.003	226.745	154.231	293.431	347.14	197.273	691.686	871.089	951.874	473.718	518.698	175.749	BP:regulation of cell proliferation;BP:regulation of catabolic process;BP:metabolic process;BP:regulation of metabolic process;BP:regulation of biological process;BP:biological regulation;BP:positive regulation of biological process;BP:proteolysis;BP:regulation of autophagy;BP:positive regulation of cell proliferation;BP:cellular process;BP:regulation of cellular process;BP:biological_process;BP:…	GO:0042127;GO:0009894;GO:0008152;GO:0019222;GO:0050789;GO:0065007;GO:0048518;GO:0006508;GO:0010506;GO:0008284;GO:0009987;GO:0050794;GO:0008150;GO:0044238;GO:0019538;GO:0043170;GO:0016241;GO:0048522GO:0110158;GO:0043227;GO:0043226;GO:0070062;GO:0016020;GO:0110165;GO:1902494;GO:1905368;GO:1905369;GO:0008303;GO:0005886;GO:0032991;GO:1903561;GO:0031982;GO:0043230;GO:0005829;GO:0005575;GO:0065010GO:00…	K08583	CAPNS1, CAPN4	hsa05131	Shigellosis	ENOG410YKQK	S:Function unknown	PF13405.12;PF00036.39;PF13499.12;PF13833.12	EF-hand_6;EF-hand_1;EF-hand_7;EF-hand_8	EF-hand domain;EF hand domain;EF-hand domain pair;EF-hand domain pair	cytoplasmic
ENSP00000301242.3	PPP1R14A	Protein phosphatase 1 regulatory subunit 14A	94274	pep chromosome:GRCh38:19:38251237:38256374:-1 gene:ENSG00000167641.11 transcript:ENST00000301242.9 gene_biotype:protein_coding transcript_biotype:protein_coding gene_symbol:PPP1R14A description:protein phosphatase 1 regulatory inhibitor subunit 14A [Source:HGNC Symbol;Acc:HGNC:14871]	3.5524	1.8288	0.03213	up	yes	610.317	171.803	349.403	233.902	95.7007	79.1757	56.7196	215.91901401034	874.964	1059.48	1009.31	287.984	315.335	114.833	BP:regulation of phosphate metabolic process;BP:regulation of metabolic process;BP:regulation of biological process;BP:biological regulation;BP:regulation of cellular process;BP:regulation of phosphorus metabolic process;BP:regulation of phosphorylation;BP:biological_processCC:cytoplasm;CC:cellular anatomical entity;CC:cytosol;CC:cellular_componentMF:phosphatase regulator activity;MF:molecular_fu…	GO:0019220;GO:0019222;GO:0050789;GO:0065007;GO:0050794;GO:0051174;GO:0042325;GO:0008150GO:0005737;GO:0110165;GO:0005829;GO:0005575GO:0019208;GO:0003674;GO:0004857;GO:0098772;GO:0019212;GO:0019888;GO:0030234;GO:0004864;GO:0004865	K12328	PPP1R14A, CPI17	hsa04270	Vascular smooth muscle contraction	ENOG4111Q1J	T:Signal transduction mechanisms	PF05361.17	PP1_inhibitor	PKC-activated protein phosphatase-1 inhibitor	mitochondrial
ENSP00000274364.6	IQGAP2	Ras GTPase-activating-like protein IQGAP2	10788	pep chromosome:GRCh38:5:76403285:76708132:1 gene:ENSG00000145703.17 transcript:ENST00000274364.11 gene_biotype:protein_coding transcript_biotype:protein_coding gene_symbol:IQGAP2 description:IQ motif containing GTPase activating protein 2 [Source:HGNC Symbol;Acc:HGNC:6111]	2.3252	1.2174	0.008395	up	yes	531.06	228.398	397.122	156.38	164.304	229.77	252.289	170.523	538.005	767.338	751.858	404.888	498.718	225.555	BP:signal transduction;BP:cellular component organization or biogenesis;BP:regulation of cytoskeleton organization;BP:mitotic actomyosin contractile ring assembly actin filament organization;BP:cellular component organization;BP:biological regulation;BP:G-protein coupled receptor signaling pathway;BP:regulation of cellular process;BP:biological_process;BP:regulation of organelle organization;BP:r…	GO:0007165;GO:0071840;GO:0051493;GO:1903479;GO:0016043;GO:0065007;GO:0007186;GO:0050794;GO:0008150;GO:0033043;GO:0032956;GO:0051128;GO:0034314;GO:0097435;GO:0032970;GO:2000689;GO:1903047;GO:0022402;GO:0070493;GO:0045010;GO:0050789;GO:0009987;GO:0007015GO:0099512;GO:0099513;GO:0031982;GO:0098588;GO:0042995;GO:0043230;GO:0043232;GO:0005829;GO:0098858;GO:0065010;GO:0030175;GO:0043228;GO:0043227;GO:0…	K05767	IQGAP2_3	hsa04810	Regulation of actin cytoskeleton	COG5261	Z:Cytoskeleton	PF00616.24;PF03836.20;PF00307.36;PF00612.33	RasGAP;RasGAP_C;CH;IQ	GTPase-activator protein for Ras-like GTPase;RasGAP C-terminus;Calponin homology;IQ calmodulin-binding motif	cytoplasmic
ENSP00000306124.3	PRKCE	Protein kinase C epsilon type	5581	pep chromosome:GRCh38:2:45651675:46187990:1 gene:ENSG00000171132.14 transcript:ENST00000306156.8 gene_biotype:protein_coding transcript_biotype:protein_coding gene_symbol:PRKCE description:protein kinase C epsilon [Source:HGNC Symbol;Acc:HGNC:9401]	2.7777	1.4739	0.03207	up	yes	554.222	199.527	440.54	164.872	99.5922	195.27	199.15597097428	97.7307	551.514	1020.94	810.801	151.492	524.523	266.058	BP:regulation of secretion;BP:positive regulation of secretion;BP:regulation of transport;BP:regulation of actin polymerization or depolymerization;BP:cellular response to stimulus;BP:positive regulation of cytoskeleton organization;BP:regulation of cytoskeleton organization;BP:response to prostaglandin;BP:response to prostaglandin E;BP:regulation of trans-synaptic signaling;BP:regulation of resp…	GO:0051046;GO:0051047;GO:0051049;GO:0008064;GO:0051716;GO:0051495;GO:0051493;GO:0034694;GO:0034695;GO:0099177;GO:0032101;GO:2000649;GO:0065009;GO:0042325;GO:0010632;GO:0019538;GO:0010638;GO:0032228;GO:0051781;GO:0009896;GO:0009894;GO:0009892;GO:0009893;GO:0032412;GO:0032413;GO:0051222;GO:0051223;GO:0050789;GO:0030072;GO:0030073;GO:2001031;GO:0002684;GO:0002682;GO:0045913;GO:0007626;GO:0070201;GO:…	K18050	PRKCE	hsa04071;hsa05131;hsa04371;hsa04022;hsa05206;hsa04530;hsa04750;hsa04666;hsa04925;hsa04270;hsa04930;hsa04931;hsa04933	Sphingolipid signaling pathway;Shigellosis;Apelin signaling pathway;cGMP-PKG signaling pathway;MicroRNAs in cancer;Tight junction;Inflammatory mediator regulation of TRP channels;Fc gamma R-mediated phagocytosis;Aldosterone synthesis and secretion;Vascular smooth muscle contraction;Type II diabetes mellitus;Insulin resistance;AGE-RAGE signaling pathway in diabetic complications	ENOG410XNPH	G:Carbohydrate transport and metabolism	PF00069.31;PF07714.23;PF00130.28;PF00168.36;PF00433.29	Pkinase;PK_Tyr_Ser-Thr;C1_1;C2;Pkinase_C	Protein kinase domain;Protein tyrosine and serine/threonine kinase;Phorbol esters/diacylglycerol binding domain;C2 domain;Protein kinase C terminal domain	cytoplasmic
ENSP00000376506.2	PDCD10	Programmed cell death protein 10	11235	pep chromosome:GRCh38:3:167683298:167734892:-1 gene:ENSG00000114209.15 transcript:ENST00000392750.7 gene_biotype:protein_coding transcript_biotype:protein_coding gene_symbol:PDCD10 description:programmed cell death 10 [Source:HGNC Symbol;Acc:HGNC:8761]	2.0899	1.0634	0.04829	up	yes	482.716	230.976	477.924	193.473	251.406	230.934	133.301	98.8184	393.48	808.675	746.839	293.97	421.23	232.103	BP:regulation of protein localization;BP:regulation of intracellular protein transport;BP:regulation of phosphate metabolic process;BP:regulation of primary metabolic process;BP:regulation of metabolic process;BP:regulation of transport;BP:regulation of intracellular transport;BP:positive regulation of response to stimulus;BP:regulation of response to stimulus;BP:negative regulation of epithelial…	GO:0032880;GO:0033157;GO:0019220;GO:0080090;GO:0019222;GO:0051049;GO:0032386;GO:0048584;GO:0048583;GO:0050680;GO:0007165;GO:0032388;GO:0051656;GO:0036481;GO:0010605;GO:0010604;GO:0009966;GO:0009967;GO:0071840;GO:0044093;GO:0048518;GO:0048519;GO:0042127;GO:0051050;GO:0060255;GO:0045859;GO:0043535;GO:0050678;GO:0042325;GO:0042327;GO:0016477;GO:0048870;GO:0048646;GO:0022607;GO:0009892;GO:0009893;GO:…	K18269	PDCD10, CCM3	hsa04520	Adherens junction	ENOG410XTA6	S:Function unknown	PF06840.17;PF20929.2	PDC10_C;PDCD10_N	Programmed cell death protein 10, C-terminal;Programmed cell death protein 10, dimerisation domain	cytoplasmic
ENSP00000227524.4	PRPF19	Pre-mRNA-processing factor 19	27339	pep chromosome:GRCh38:11:60890547:60906585:-1 gene:ENSG00000110107.9 transcript:ENST00000227524.9 gene_biotype:protein_coding transcript_biotype:protein_coding gene_symbol:PRPF19 description:pre-mRNA processing factor 19 [Source:HGNC Symbol;Acc:HGNC:17896]	0.4027	-1.3122	0.04914	down	yes	197.094	489.483	425.57081447375	557.327	780.3	179.43	845.972	148.3	244.639	98.0558	21.7659	207.325	225.855	384.921	BP:protein localization;BP:spliceosomal tri-snRNP complex assembly;BP:spliceosomal complex assembly;BP:regulation of metabolic process;BP:positive regulation of mRNA processing;BP:regulation of mRNA processing;BP:signal transduction;BP:cellular component organization or biogenesis;BP:regulation of primary metabolic process;BP:cellular response to stimulus;BP:double-strand break repair via nonhomo…	GO:0008104;GO:0000244;GO:0000245;GO:0019222;GO:0050685;GO:0050684;GO:0007165;GO:0071840;GO:0080090;GO:0051716;GO:0006303;GO:0010604;GO:0070727;GO:0070647;GO:0032446;GO:0048518;GO:0048519;GO:0033036;GO:0043687;GO:0070534;GO:0006281;GO:0060255;GO:0030163;GO:0019538;GO:0000398;GO:0016567;GO:0033554;GO:0022607;GO:0009893;GO:0009891;GO:0033120;GO:0035556;GO:0050789;GO:0000387;GO:0031570;GO:0016043;GO:…	K10599	PRPF19, PRP19	hsa03040;hsa04120	Spliceosome;Ubiquitin mediated proteolysis	ENOG410XPQV	A:RNA processing and modification	PF24814.1;PF00400.38;PF24807.1;PF24817.1;PF08606.16;PF23414.1;PF24796.1;PF23393.2;PF24805.1;PF24782.1;PF25047.1;PF24105.1;PF23409.1;PF23869.1;PF12894.13;PF24780.1;PF23383.1;PF24017.1;PF23609.1;PF20426.4;PF23756.1;PF23342.1;PF23381.1;PF04564.21;PF23341.1;PF23411.1	WD40_Prp19;WD40;WD40_CDC20-Fz;WD40_WDHD1_1st;Prp19;Beta-prop_EML_2;WDR55;Beta-prop_WDR90_POC16_2nd;EIF3I;WD40_MABP1-WDR62_2nd;Beta-prop_TEP1_2nd;Beta-prop_CAF1B_HIR1;Beta-prop_EML;Beta-prop_WDR75_1st;ANAPC4_WD40;WD40_MABP1-WDR62_1st;Beta-prop_IFT140_1st;Beta-prop_SCAP;Beta-prop_EIPR1;NBCH_WD40;Beta-prop_HPS5;WDR90_beta-prop_4th;Beta-prop_IFT122_1st;U-box;PEP5_VPS11_N;Beta-prop_Vps41	Prp19 WD40 domain;WD domain, G-beta repeat;CDC20/Fizzy WD40 domain;WDHD1 first WD40 domain;Prp19/Pso4-like;Echinoderm microtubule-associated protein second beta-propeller;WDR55;WDR90/POC16, second beta-propeller;EIF3I;MABP1/WDR62 second WD40 domain;TEP-1 second beta-propeller;CAF1B/HIR1 beta-propeller domain;Echinoderm microtubule-associated protein first beta-propeller;WD repeat-containing prote…	cytoplasmic
ENSP00000308107.5	HPSE	Heparanase	10855	pep chromosome:GRCh38:4:83292461:83334848:-1 gene:ENSG00000173083.16 transcript:ENST00000311412.10 gene_biotype:protein_coding transcript_biotype:protein_coding gene_symbol:HPSE description:heparanase [Source:HGNC Symbol;Acc:HGNC:5164]	2.263	1.1782	0.04778	up	yes	466.703	206.231	249.784	291.335	153.21	63.7174	259.037	220.302	777.64	647.547	618.81	267.869	436.459	51.8929	BP:protein localization;BP:regulation of metabolic process;BP:positive regulation of response to stimulus;BP:regulation of response to stimulus;BP:cell-matrix adhesion;BP:positive regulation of protein kinase B signaling;BP:regulation of protein kinase B signaling;BP:positive regulation of macromolecule metabolic process;BP:cellular macromolecule localization;BP:regulation of signal transduction;…	GO:0008104;GO:0019222;GO:0048584;GO:0048583;GO:0007160;GO:0051897;GO:0051896;GO:0010604;GO:0070727;GO:0009966;GO:0048869;GO:0051798;GO:0048518;GO:0033036;GO:0002064;GO:0042127;GO:0031589;GO:0060255;GO:0048468;GO:0045184;GO:0030167;GO:0030163;GO:0010033;GO:0023056;GO:0019538;GO:0048646;GO:0030193;GO:0010575;GO:0030194;GO:0030203;GO:0030202;GO:0030200;GO:0050820;GO:0010628;GO:0050789;GO:0061028;GO:…	K07964	HPSE	hsa05205;hsa01100;hsa00531	Proteoglycans in cancer;Metabolic pathways;Glycosaminoglycan degradation	ENOG410YDJW	G:Carbohydrate transport and metabolism	PF03662.20	Glyco_hydro_79n	Glycosyl hydrolase family 79, N-terminal domain	plasma membrane
ENSP00000262613.5	NHERF1	Na(+)/H(+) exchange regulatory cofactor NHE-RF1	9368	pep chromosome:GRCh38:17:74748628:74769353:1 gene:ENSG00000109062.12 transcript:ENST00000262613.10 gene_biotype:protein_coding transcript_biotype:protein_coding gene_symbol:NHERF1 description:NHERF family PDZ scaffold protein 1 [Source:HGNC Symbol;Acc:HGNC:11075]	2.1335	1.0932	0.04951	up	yes	452.404	212.048	460.38	178.256	125.398	185.101	146.585	176.566	540.805	696.272	613.624	212.822	534.962	115.94	BP:regulation of MAPK cascade;BP:positive regulation of apoptotic signaling pathway;BP:protein localization;BP:regulation of secretion;BP:regulation of transport;BP:negative regulation of response to stimulus;BP:positive regulation of response to stimulus;BP:regulation of response to stimulus;BP:auditory receptor cell stereocilium organization;BP:membrane organization;BP:plasma membrane organizat…	GO:0043408;GO:2001235;GO:0008104;GO:0051046;GO:0051049;GO:0048585;GO:0048584;GO:0048583;GO:0060088;GO:0061024;GO:0007009;GO:0007163;GO:0003014;GO:0007165;GO:0051641;GO:0098771;GO:0003341;GO:0007600;GO:0051896;GO:0071840;GO:0043065;GO:0072659;GO:0045786;GO:0009968;GO:0098801;GO:0007212;GO:0048869;GO:0090162;GO:0010959;GO:1990778;GO:0030855;GO:0048518;GO:0048519;GO:0010762;GO:0030859;GO:0019725;GO:…	K13365	SLC9A3R1, NHERF1	hsa04530;hsa05165;hsa05130;hsa04928	Tight junction;Human papillomavirus infection;Pathogenic Escherichia coli infection;Parathyroid hormone synthesis, secretion and action	ENOG4110SZZ	K:Transcription	PF09007.17;PF00595.29;PF17820.7;PF13180.12	EBP50_C;PDZ;PDZ_6;PDZ_2	EBP50, C-terminal;PDZ domain;PDZ domain;PDZ domain	cytoplasmic
ENSP00000444467.1	RAP1B	RAP1B, member of RAS oncogene family	-	pep chromosome:GRCh38:12:68610918:68657150:1 gene:ENSG00000127314.18 transcript:ENST00000538980.5 gene_biotype:protein_coding transcript_biotype:protein_coding gene_symbol:RAP1B description:RAP1B, member of RAS oncogene family [Source:HGNC Symbol;Acc:HGNC:9857]	2.5022	1.3232	0.02021	up	yes	462.678	184.907	227.799	213.47394954498	216.73289632996	175.94061209224	160.69007561434	114.804	320.163	515.382	910.027	302.674	479.658	248.16412049547	BP:negative regulation of exocytosis;BP:cellular response to cAMP;BP:regulation of secretion;BP:negative regulation of secretion;BP:response to stimulus;BP:regulation of signaling;BP:modulation of synaptic transmission;BP:regulation of biological process;BP:cellular response to chemical stimulus;BP:regulation of neurotransmitter transport;BP:negative regulation of cellular process;BP:response to …	GO:0045920;GO:0071320;GO:0051046;GO:0051048;GO:0050896;GO:0023051;GO:0050804;GO:0050789;GO:0070887;GO:0051588;GO:0048523;GO:0014074;GO:0014070;GO:0051716;GO:0032879;GO:1903530;GO:0010646;GO:0099177;GO:0065007;GO:0051049;GO:1903306;GO:1903305;GO:0046683;GO:0017157;GO:0051051;GO:0046928;GO:0009987;GO:0051591;GO:0008150;GO:0032486;GO:0042221;GO:0007264;GO:0050794;GO:1901700;GO:1901701;GO:0048519;GO:…	K07836	RAP1B	hsa04972;hsa04611;hsa04722;hsa04014;hsa05211;hsa04024;hsa04720;hsa04015;hsa04670;hsa04510;hsa04010;hsa04934;hsa04520;hsa04062;hsa05417	Pancreatic secretion;Platelet activation;Neurotrophin signaling pathway;Ras signaling pathway;Renal cell carcinoma;cAMP signaling pathway;Long-term potentiation;Rap1 signaling pathway;Leukocyte transendothelial migration;Focal adhesion;MAPK signaling pathway;Cushing syndrome;Adherens junction;Chemokine signaling pathway;Lipid and atherosclerosis	COG1100	Z:Cytoskeleton	PF00071.28;PF08477.19	Ras;Roc	Ras family;Ras of Complex, Roc, domain of DAPkinase	cytoplasmic
ENSP00000423772.1	KIF2A	Kinesin-like protein KIF2A	3796	pep chromosome:GRCh38:5:62311813:62385719:1 gene:ENSG00000068796.19 transcript:ENST00000506857.5 gene_biotype:protein_coding transcript_biotype:protein_coding gene_symbol:KIF2A description:kinesin family member 2A [Source:HGNC Symbol;Acc:HGNC:6318]	2.0203	1.0146	0.03676	up	yes	421.144	208.461	317.097	147.723	112.571	208.131	218.011	247.234	331.003	649.942	649.112	280.801	465.898	150.11	BP:cell cycle;BP:cell division;BP:cellular process;BP:biological_process;BP:microtubule-based process;BP:microtubule-based movementCC:supramolecular fiber;CC:polymeric cytoskeletal fiber;CC:intracellular organelle;CC:non-membrane-bounded organelle;CC:microtubule;CC:organelle;CC:cytoplasm;CC:supramolecular complex;CC:spindle;CC:nucleolus;CC:centrosome;CC:microtubule organizing center;CC:nucleoplas…	GO:0007049;GO:0051301;GO:0009987;GO:0008150;GO:0007017;GO:0007018GO:0099512;GO:0099513;GO:0043229;GO:0043228;GO:0005874;GO:0043226;GO:0005737;GO:0099080;GO:0005819;GO:0005730;GO:0005813;GO:0005815;GO:0005654;GO:0110165;GO:0016604;GO:0043232;GO:0005575;GO:0099081GO:0035639;GO:1901363;GO:0003674;GO:0005488;GO:0005524;GO:0000166;GO:0043167;GO:0017076;GO:0003774;GO:0043168;GO:0015631;GO:0008017;GO:19…	K10393	KIF2_24, MCAK	hsa04814	Motor proteins	COG5059	S:Function unknown	PF00225.29;PF16796.11;PF22923.1	Kinesin;Microtub_bd;KIF2A-like_1st	Kinesin motor domain;Microtubule binding;Kinesin-like protein KIF2A-like, N-terminal	cytoplasmic
ENSP00000340211.5	CORO1B	Coronin-1B	57175	pep chromosome:GRCh38:11:67435510:67443476:-1 gene:ENSG00000172725.14 transcript:ENST00000341356.10 gene_biotype:protein_coding transcript_biotype:protein_coding gene_symbol:CORO1B description:coronin 1B [Source:HGNC Symbol;Acc:HGNC:2253]	2.1939	1.1335	0.02798	up	yes	414.752	189.049	367.693	176.978	132.448	151.237	133.197	172.74	461.91	630.599	580.345	216.946	456.927	141.781	BP:protein localization;BP:negative regulation of response to stimulus;BP:regulation of response to stimulus;BP:regulation of chemotaxis;BP:negative regulation of chemotaxis;BP:cell chemotaxis;BP:regulation of cell projection organization;BP:cellular component organization or biogenesis;BP:taxis;BP:cellular macromolecule localization;BP:negative regulation of cytoskeleton organization;BP:regulati…	GO:0008104;GO:0048585;GO:0048583;GO:0050920;GO:0050922;GO:0060326;GO:0031344;GO:0071840;GO:0042330;GO:0070727;GO:0051494;GO:0051493;GO:0070848;GO:0048518;GO:0048519;GO:0033036;GO:0006935;GO:0048870;GO:0010639;GO:0031529;GO:0022604;GO:0022607;GO:0022603;GO:0030334;GO:0120036;GO:0043542;GO:2000392;GO:2000394;GO:0016043;GO:0065007;GO:0016477;GO:0035767;GO:2000145;GO:0051130;GO:0050793;GO:0042060;GO:…	K13886	CORO1B_1C_6	------	------	ENOG410XQAD	S:Function unknown	PF08953.17;PF16300.11;PF00400.38;PF24814.1;PF24807.1;PF24105.1;PF25047.1;PF24817.1;PF24796.1;PF23414.1;PF23775.1;PF12894.13;PF24805.1;PF08954.16	DUF1899;WD40_4;WD40;WD40_Prp19;WD40_CDC20-Fz;Beta-prop_CAF1B_HIR1;Beta-prop_TEP1_2nd;WD40_WDHD1_1st;WDR55;Beta-prop_EML_2;Beta-prop_RIG_2nd;ANAPC4_WD40;EIF3I;Trimer_CC	Domain of unknown function;Type of WD40 repeat;WD domain, G-beta repeat;Prp19 WD40 domain;CDC20/Fizzy WD40 domain;CAF1B/HIR1 beta-propeller domain;TEP-1 second beta-propeller;WDHD1 first WD40 domain;WDR55;Echinoderm microtubule-associated protein second beta-propeller;RIG second beta-propeller;Anaphase-promoting complex subunit 4 WD40 domain;EIF3I;Trimerisation motif	cytoplasmic
ENSP00000377958.3	CCT4	T-complex protein 1 subunit delta	10575	pep chromosome:GRCh38:2:61868085:61888656:-1 gene:ENSG00000115484.15 transcript:ENST00000394440.8 gene_biotype:protein_coding transcript_biotype:protein_coding gene_symbol:CCT4 description:chaperonin containing TCP1 subunit 4 [Source:HGNC Symbol;Acc:HGNC:1617]	2.2656	1.1799	0.03642	up	yes	403.292	178.005	321.443	186.242	72.5279	156.603	166.958	164.255	408.483	699.585	588.923	168.118	375.763	178.883	BP:regulation of metabolic process;BP:positive regulation of establishment of protein localization to telomere;BP:regulation of primary metabolic process;BP:positive regulation of macromolecule metabolic process;BP:positive regulation of biological process;BP:macromolecule localization;BP:positive regulation of DNA metabolic process;BP:regulation of DNA metabolic process;BP:regulation of macromol…	GO:0019222;GO:1904851;GO:0080090;GO:0010604;GO:0048518;GO:0033036;GO:0051054;GO:0051052;GO:0060255;GO:0090670;GO:0010638;GO:0051130;GO:0006457;GO:0009893;GO:0070202;GO:0050821;GO:0090666;GO:0050789;GO:0065007;GO:0065008;GO:0051973;GO:0070203;GO:0070201;GO:2000278;GO:0009889;GO:0050794;GO:0008150;GO:0061077;GO:1900180;GO:1900182;GO:0031647;GO:0010557;GO:0010556;GO:2001252;GO:0033044;GO:0033043;GO:…	K09496	CCT4	------	------	COG0459	T:Signal transduction mechanisms	PF00118.29	Cpn60_TCP1	TCP-1/cpn60 chaperonin family	cytoplasmic
ENSP00000316854.6	ATOX1	Copper transport protein ATOX1	475	pep chromosome:GRCh38:5:151742822:151758631:-1 gene:ENSG00000177556.12 transcript:ENST00000313115.11 gene_biotype:protein_coding transcript_biotype:protein_coding gene_symbol:ATOX1 description:antioxidant 1 copper chaperone [Source:HGNC Symbol;Acc:HGNC:798]	2.4602	1.2988	0.0185	up	yes	412.982	167.864	325.062	138.027	101.416	107.004	217.44533842333	118.228	588.93	700.177	367.257	226.078	377.564	217.887	BP:ion homeostasis;BP:homeostatic process;BP:copper ion homeostasis;BP:copper ion transport;BP:inorganic ion homeostasis;BP:cellular copper ion homeostasis;BP:transition metal ion transport;BP:cellular homeostasis;BP:cation transport;BP:ion transport;BP:transport;BP:response to oxidative stress;BP:cellular ion homeostasis;BP:response to stress;BP:metal ion transport;BP:cellular cation homeostasis…	GO:0050801;GO:0042592;GO:0055070;GO:0006825;GO:0098771;GO:0006878;GO:0000041;GO:0019725;GO:0006812;GO:0006811;GO:0006810;GO:0006979;GO:0006873;GO:0006950;GO:0030001;GO:0030003;GO:0055080;GO:0055082;GO:0051234;GO:0051179;GO:0048878;GO:0008150;GO:0050896GO:0110165;GO:0005829;GO:0005575GO:0003674;GO:0005488;GO:0043169;GO:0046914;GO:0043167;GO:0016531;GO:0016530;GO:0005507;GO:0032767;GO:1903136;GO:00…	K07213	ATOX1, ATX1, copZ, golB	hsa04978	Mineral absorption	COG2608	S:Function unknown	PF00403.32	HMA	Heavy-metal-associated domain	cytoplasmic
ENSP00000265052.5	-	MGLL	-	pep chromosome:GRCh38:3:127689066:127822515:-1 gene:ENSG00000074416.16 transcript:ENST00000265052.10 gene_biotype:protein_coding transcript_biotype:protein_coding gene_symbol:MGLL description:monoglyceride lipase [Source:HGNC Symbol;Acc:HGNC:17038]	2.7	1.433	0.03141	up	yes	407.402	150.89	364.749	123.02	70.0865	120.953	186.49	40.0402	310.448	577.29	754.335	197.862	410.732	193.748	BP:fatty acid biosynthetic process;BP:fatty acid metabolic process;BP:regulation of multicellular organismal process;BP:regulation of response to external stimulus;BP:response to stress;BP:acylglycerol metabolic process;BP:regulation of signaling;BP:regulation of response to stimulus;BP:carboxylic acid metabolic process;BP:monoacylglycerol catabolic process;BP:long-chain fatty acid metabolic proc…	GO:0006633;GO:0006631;GO:0051239;GO:0032101;GO:0006950;GO:0006639;GO:0023051;GO:0048583;GO:0019752;GO:0052651;GO:0001676;GO:0008277;GO:0044281;GO:0044283;GO:0010646;GO:0072330;GO:0031347;GO:0044057;GO:0006690;GO:0009966;GO:0051931;GO:0031644;GO:0050789;GO:0065007;GO:0046464;GO:0046462;GO:0016042;GO:0046461;GO:0006954;GO:0006638;GO:0006629;GO:0006641;GO:0009987;GO:0050727;GO:0032787;GO:0006952;GO:…	K01054	MGLL	hsa04714;hsa00561;hsa04923;hsa01100;hsa04723	Thermogenesis;Glycerolipid metabolism;Regulation of lipolysis in adipocytes;Metabolic pathways;Retrograde endocannabinoid signaling	COG2267	I:Lipid transport and metabolism	PF12146.15;PF00561.26;PF12697.13;PF20408.4;PF00756.26;PF01764.32	Hydrolase_4;Abhydrolase_1;Abhydrolase_6;Abhydrolase_11;Esterase;Lipase_3	Serine aminopeptidase, S33;alpha/beta hydrolase fold;Alpha/beta hydrolase family;Alpha/beta hydrolase domain;Putative esterase;Lipase	cytoplasmic
ENSP00000358547.3	MPP1	55 kDa erythrocyte membrane protein	4354	pep chromosome:GRCh38:X:154778684:154805485:-1 gene:ENSG00000130830.15 transcript:ENST00000369534.8 gene_biotype:protein_coding transcript_biotype:protein_coding gene_symbol:MPP1 description:MAGUK p55 scaffold protein 1 [Source:HGNC Symbol;Acc:HGNC:7219]	2.8563	1.5141	0.00507	up	yes	395.268	138.385	327.708	91.3139	40.9152	201.215	86.3511	82.8039	476.872	490.537	497.796	306.691	450.632	149.08	BP:regulation of response to external stimulus;BP:regulation of response to stimulus;BP:regulation of cell migration;BP:regulation of chemotaxis;BP:signal transduction;BP:regulation of biological process;BP:regulation of neutrophil chemotaxis;BP:regulation of leukocyte migration;BP:regulation of immune system process;BP:regulation of granulocyte chemotaxis;BP:biological regulation;BP:regulation o…	GO:0032101;GO:0048583;GO:0030334;GO:0050920;GO:0007165;GO:0050789;GO:0090022;GO:0002685;GO:0002682;GO:0071622;GO:0065007;GO:0002688;GO:0050794;GO:0008150;GO:0040012;GO:2000145;GO:1902622;GO:0009987GO:0098858;GO:0043229;GO:0070161;GO:0030054;GO:0005856;GO:0016020;GO:0043226;GO:0043005;GO:0032420;GO:0034451;GO:0005911;GO:0005886;GO:0120025;GO:0042995;GO:0043232;GO:0030863;GO:0005575;GO:0043228;GO:0…	K21880	MPP1	------	------	COG0194	F:Nucleotide transport and metabolism	PF00625.27;PF00595.29;PF00018.34;PF07653.23	Guanylate_kin;PDZ;SH3_1;SH3_2	Guanylate kinase;PDZ domain;SH3 domain;Variant SH3 domain	cytoplasmic
ENSP00000238497.4	VPS4B	Vacuolar protein sorting-associated protein 4B	9525	pep chromosome:GRCh38:18:63389190:63422476:-1 gene:ENSG00000119541.10 transcript:ENST00000238497.10 gene_biotype:protein_coding transcript_biotype:protein_coding gene_symbol:VPS4B description:vacuolar protein sorting 4 homolog B [Source:HGNC Symbol;Acc:HGNC:10895]	2.0047	1.0034	0.03901	up	yes	346.752	172.973	253.668	73.2659	96.0486	157.683	314.374	142.79603472739	312.699	516.694	504.212	254.088	376.169	116.64763909882	BP:nucleus organization;BP:late endosomal microautophagy;BP:regulation of secretion;BP:positive regulation of secretion;BP:negative regulation of secretion;BP:regulation of transport;BP:cell development;BP:membrane organization;BP:plasma membrane organization;BP:protein localization;BP:signal transduction;BP:cell surface receptor signaling pathway;BP:establishment of organelle localization;BP:cel…	GO:0006997;GO:0061738;GO:0051046;GO:0051047;GO:0051048;GO:0051049;GO:0048468;GO:0061024;GO:0007009;GO:0008104;GO:0007165;GO:0007166;GO:0051656;GO:0071840;GO:0033043;GO:0070727;GO:0048869;GO:0051495;GO:0051493;GO:0044419;GO:0007080;GO:1902774;GO:0060856;GO:0048518;GO:0048519;GO:0033036;GO:0090169;GO:0051051;GO:0051050;GO:0031468;GO:0010971;GO:0061919;GO:1904903;GO:1902410;GO:0051701;GO:0051128;GO:…	K12196	VPS4	hsa03272;hsa03250;hsa04144;hsa04217	Virion - Hepatitis viruses;Viral life cycle - HIV-1;Endocytosis;Necroptosis	ENOG410XRHN	O:Posttranslational modification, protein turnover, chaperones	PF00004.35;PF09336.16;PF04212.24;PF17862.7;PF13191.12;PF06068.19	AAA;Vps4_C;MIT;AAA_lid_3;AAA_16;TIP49	ATPase family associated with various cellular activities;Vps4 C terminal oligomerisation domain;MIT;AAA+ lid domain;AAA ATPase domain;TIP49 P-loop domain	cytoplasmic
ENSP00000366453.4	TJP2	Tight junction protein 2	9414	pep chromosome:GRCh38:9:69174277:69255208:1 gene:ENSG00000119139.21 transcript:ENST00000377245.9 gene_biotype:protein_coding transcript_biotype:protein_coding gene_symbol:TJP2 description:tight junction protein 2 [Source:HGNC Symbol;Acc:HGNC:11828]	2.2062	1.1416	0.02187	up	yes	357.2	161.905	260.557	169.195	104.98175400969	146.724	134.641	155.333	330.595	530.408	572.384	205.479	350.817	153.516	BP:positive regulation of maintenance of permeability of blood-brain barrier;BP:intestinal absorption;BP:maintenance of permeability of blood-brain barrier;BP:protein localization;BP:digestive system process;BP:cell-cell junction organization;BP:regulation of maintenance of permeability of blood-brain barrier;BP:anatomical structure homeostasis;BP:cell junction organization;BP:cell development;BP…	GO:1905605;GO:0050892;GO:0035633;GO:0008104;GO:0022600;GO:0045216;GO:1905603;GO:0060249;GO:0034330;GO:0048468;GO:0042592;GO:0001885;GO:0003013;GO:0051641;GO:0003018;GO:0150105;GO:0070727;GO:0090557;GO:0010033;GO:0016043;GO:0051179;GO:0065007;GO:0071840;GO:0065008;GO:0032502;GO:0032501;GO:0098609;GO:0034109;GO:0009987;GO:0008150;GO:0007155;GO:0001894;GO:0061028;GO:1902414;GO:0003008;GO:0033036;GO:…	K06098	TJP2, ZO2	hsa04530;hsa05110	Tight junction;Vibrio cholerae infection	ENOG410XQP3	O:Posttranslational modification, protein turnover, chaperones	PF00595.29;PF17820.7;PF13180.12;PF00625.27;PF07653.23	PDZ;PDZ_6;PDZ_2;Guanylate_kin;SH3_2	PDZ domain;PDZ domain;PDZ domain;Guanylate kinase;Variant SH3 domain	nuclear
ENSP00000262418.6	SLC4A1	Band 3 anion transport protein	6521	pep chromosome:GRCh38:17:44248390:44268135:-1 gene:ENSG00000004939.16 transcript:ENST00000262418.12 gene_biotype:protein_coding transcript_biotype:protein_coding gene_symbol:SLC4A1 description:solute carrier family 4 member 1 (Diego blood group) [Source:HGNC Symbol;Acc:HGNC:11027]	0.2698	-1.89	0.02842	down	yes	105.673	391.659	166.161	136.369	357.988	620.861	257.61	810.964	174.26	154.651	86.3603	54.9674	80.8521	82.9502	BP:protein localization;BP:hemostasis;BP:regulation of primary metabolic process;BP:regulation of metabolic process;BP:blood coagulation;BP:cell development;BP:negative regulation of ATP metabolic process;BP:membrane organization;BP:plasma membrane organization;BP:chloride transport;BP:renal system process;BP:regulation of phosphate metabolic process;BP:negative regulation of nucleotide metabolic…	GO:0008104;GO:0007599;GO:0080090;GO:0019222;GO:0007596;GO:0048468;GO:1903579;GO:0061024;GO:0007009;GO:0006821;GO:0003014;GO:0019220;GO:0045980;GO:0071840;GO:0070727;GO:0048869;GO:0048519;GO:0033036;GO:0019725;GO:1904538;GO:1904539;GO:0015711;GO:0034204;GO:0072657;GO:0051668;GO:0072659;GO:0003008;GO:1903578;GO:0006820;GO:0048878;GO:0045820;GO:0015701;GO:0009895;GO:0009892;GO:0015914;GO:0050789;GO:…	K06573	SLC4A1, AE1, CD233	hsa04966	Collecting duct acid secretion	ENOG410XPHD	U:Intracellular trafficking, secretion, and vesicular transport	PF00955.27;PF07565.18	HCO3_cotransp;Band_3_cyto	HCO3- transporter integral membrane domain;Band 3 cytoplasmic domain	cytoplasmic
ENSP00000461932.1	MTAP	S-methyl-5'-thioadenosine phosphorylase	-	pep chromosome:GRCh38:9:21802642:21862320:1 gene:ENSG00000099810.21 transcript:ENST00000460874.6 gene_biotype:protein_coding transcript_biotype:protein_coding gene_symbol:MTAP description:methylthioadenosine phosphorylase [Source:HGNC Symbol;Acc:HGNC:7413]	2.0448	1.032	0.01611	up	yes	327.087	159.96	134.849	238.072	107.558	147.963	124.147	207.173	518.927	434.502	356.81	190.311	250.793	211.177	BP:nucleoside salvage;BP:carbohydrate derivative biosynthetic process;BP:L-methionine salvage;BP:carboxylic acid metabolic process;BP:L-methionine biosynthetic process;BP:nucleobase-containing compound biosynthetic process;BP:aspartate family amino acid biosynthetic process;BP:small molecule metabolic process;BP:small molecule biosynthetic process;BP:purine-containing compound metabolic process;B…	GO:0043174;GO:1901137;GO:0071267;GO:0019752;GO:0071265;GO:0034654;GO:0009067;GO:0044281;GO:0044283;GO:0072521;GO:0072522;GO:0014070;GO:0006139;GO:0046128;GO:0019509;GO:0042451;GO:0033993;GO:0006520;GO:0042455;GO:0043102;GO:0042278;GO:0043101;GO:1901605;GO:1901607;GO:0006166;GO:0009119;GO:0043094;GO:0000096;GO:0008652;GO:0000097;GO:0009987;GO:1901135;GO:1901659;GO:0009058;GO:0008150;GO:0009116;GO:…	K00772	mtaP, MTAP	hsa01100;hsa00270	Metabolic pathways;Cysteine and methionine metabolism	COG0005	F:Nucleotide transport and metabolism	PF01048.26	PNP_UDP_1	Phosphorylase superfamily	mitochondrial
ENSP00000457912.1	SULT1A1	Sulfotransferase 1A1	6817	pep chromosome:GRCh38:16:28605196:28608920:-1 gene:ENSG00000196502.15 transcript:ENST00000569554.5 gene_biotype:protein_coding transcript_biotype:protein_coding gene_symbol:SULT1A1 description:sulfotransferase family 1A member 1 [Source:HGNC Symbol;Acc:HGNC:11453]	2.0016	1.0012	0.0295	up	yes	317.431	158.588	253.138	104.977	107.435	98.1587	155.335	232.486	371.652	409.371	456.311	219.124	358.676	89.455	BP:ribonucleotide metabolic process;BP:flavonoid metabolic process;BP:xenobiotic metabolic process;BP:estrogen metabolic process;BP:small molecule catabolic process;BP:purine ribonucleoside bisphosphate metabolic process;BP:purine nucleotide metabolic process;BP:hormone metabolic process;BP:organophosphate metabolic process;BP:alcohol metabolic process;BP:catechol-containing compound metabolic pr…	GO:0009259;GO:0009812;GO:0006805;GO:0008210;GO:0044282;GO:0034035;GO:0006163;GO:0042445;GO:0019637;GO:0006066;GO:0009712;GO:0050427;GO:0065007;GO:0055086;GO:0051923;GO:0065008;GO:0034310;GO:0046164;GO:0006629;GO:0009308;GO:0006139;GO:0009987;GO:0006584;GO:0034032;GO:0010817;GO:0044281;GO:0008150;GO:0008152;GO:0033875;GO:0043436;GO:0018958;GO:0034308;GO:0009150;GO:0009056;GO:0008202;GO:0072521;GO:…	K01014	SULT1A	hsa05204	Chemical carcinogenesis - DNA adducts	ENOG4111H56	S:Function unknown	PF00685.33;PF13469.12	Sulfotransfer_1;Sulfotransfer_3	Sulfotransferase domain;Sulfotransferase family	cytoplasmic
ENSP00000403922.1	HLA-A	Major histocompatibility complex, class I, A	-	pep scaffold:GRCh38:HSCHR6_MHC_MCF_CTG1:1286636:1289979:1 gene:ENSG00000227715.11 transcript:ENST00000453057.5 gene_biotype:protein_coding transcript_biotype:protein_coding gene_symbol:HLA-A description:major histocompatibility complex, class I, A [Source:HGNC Symbol;Acc:HGNC:4931]	2.6702	1.4169	0.0001159	up	yes	337.812	126.513	20.8936	81.6124	226.278	127.786	144.971	157.541	396.978	282.77858876104	339.593	282.089	381.51271502122	343.91935906935	BP:regulation of lymphocyte mediated immunity;BP:regulation of response to stimulus;BP:regulation of adaptive immune response;BP:regulation of cell killing;BP:positive regulation of leukocyte mediated immunity;BP:antigen processing and presentation of peptide antigen;BP:positive regulation of cell killing;BP:immune response;BP:regulation of biological process;BP:regulation of T cell mediated immu…	GO:0002706;GO:0048583;GO:0002819;GO:0031341;GO:0002705;GO:0048002;GO:0031343;GO:0006955;GO:0050789;GO:0002709;GO:0002708;GO:0002475;GO:0002476;GO:0048584;GO:0002684;GO:0002682;GO:0048518;GO:0065007;GO:0002824;GO:0019882;GO:0019883;GO:0019885;GO:0002474;GO:0002822;GO:0050794;GO:0002486;GO:0008150;GO:0002483;GO:0002821;GO:0002484;GO:0002428;GO:0050776;GO:0002711;GO:0050896;GO:0050778;GO:0002376;GO:…	K06751	MHC1	hsa05163;hsa04612;hsa04650;hsa05320;hsa05330;hsa05203;hsa05332;hsa04940;hsa04218;hsa04514;hsa05168;hsa04144;hsa05165;hsa04145;hsa05166;hsa05167;hsa05169;hsa05416;hsa05170	Human cytomegalovirus infection;Antigen processing and presentation;Natural killer cell mediated cytotoxicity;Autoimmune thyroid disease;Allograft rejection;Viral carcinogenesis;Graft-versus-host disease;Type I diabetes mellitus;Cellular senescence;Cell adhesion molecules;Herpes simplex virus 1 infection;Endocytosis;Human papillomavirus infection;Phagosome;Human T-cell leukemia virus 1 infection;…	ENOG4111K8F	U:Intracellular trafficking, secretion, and vesicular transport	PF00129.23;PF06623.16;PF07654.21;PF13927.12	MHC_I;MHC_I_C;C1-set;Ig_3	Class I Histocompatibility antigen, domains alpha 1 and 2;MHC_I C-terminus;Immunoglobulin C1-set domain;Immunoglobulin domain	peroxisomal
ENSP00000254029.3	WDR44	WD repeat-containing protein 44	54521	pep chromosome:GRCh38:X:118346106:118449961:1 gene:ENSG00000131725.14 transcript:ENST00000254029.8 gene_biotype:protein_coding transcript_biotype:protein_coding gene_symbol:WDR44 description:WD repeat domain 44 [Source:HGNC Symbol;Acc:HGNC:30512]	2.2981	1.2004	0.01979	up	yes	294.531	128.164	265.099	123.384	75.041	154.201	127.191	24.0678	346.719	406.795	442.857	169.119	248.257	153.437	BP:regulation of cell projection assembly;BP:cellular component assembly;BP:regulation of organelle organization;BP:cell projection organization;BP:regulation of transport;BP:regulation of cellular component organization;BP:plasma membrane bounded cell projection organization;BP:cytosolic ciliogenesis;BP:regulation of plasma membrane bounded cell projection organization;BP:regulation of biologica…	GO:0060491;GO:0022607;GO:0033043;GO:0030030;GO:0051049;GO:0051128;GO:0120036;GO:0061824;GO:0120035;GO:0050789;GO:0071840;GO:0120031;GO:0070925;GO:0010639;GO:0031345;GO:0016043;GO:0051129;GO:0065007;GO:1902018;GO:1902116;GO:0030031;GO:0048519;GO:1902017;GO:0031344;GO:1902115;GO:0060271;GO:0009987;GO:0060627;GO:0120032;GO:0008150;GO:0120033;GO:0032879;GO:0050794;GO:0006996;GO:0044087;GO:0044782;GO:…	K20241	WDR44, RAB11BP	------	------	ENOG410XQPJ	S:Function unknown	PF00400.38;PF24814.1;PF24807.1;PF23414.1;PF24817.1;PF24105.1;PF24796.1;PF24805.1;PF23393.2;PF25047.1;PF24782.1;PF23761.1;PF23869.1	WD40;WD40_Prp19;WD40_CDC20-Fz;Beta-prop_EML_2;WD40_WDHD1_1st;Beta-prop_CAF1B_HIR1;WDR55;EIF3I;Beta-prop_WDR90_POC16_2nd;Beta-prop_TEP1_2nd;WD40_MABP1-WDR62_2nd;Beta-prop_DCAF4;Beta-prop_WDR75_1st	WD domain, G-beta repeat;Prp19 WD40 domain;CDC20/Fizzy WD40 domain;Echinoderm microtubule-associated protein second beta-propeller;WDHD1 first WD40 domain;CAF1B/HIR1 beta-propeller domain;WDR55;EIF3I;WDR90/POC16, second beta-propeller;TEP-1 second beta-propeller;MABP1/WDR62 second WD40 domain;DDB1- and CUL4-associated factor 4 beta-propeller;WD repeat-containing protein 75 first beta-propeller	cytoplasmic
ENSP00000256460.3	CAMK1	Calcium/calmodulin-dependent protein kinase type 1	8536	pep chromosome:GRCh38:3:9757347:9769947:-1 gene:ENSG00000134072.11 transcript:ENST00000256460.8 gene_biotype:protein_coding transcript_biotype:protein_coding gene_symbol:CAMK1 description:calcium/calmodulin dependent protein kinase I [Source:HGNC Symbol;Acc:HGNC:1459]	3.2156	1.6851	0.02469	up	yes	313.212	97.4029	210.496	103.444	10.4076	107.424	57.329	95.3174	218.992	555.042	529.891	206.942	282.518	85.8887	BP:regulation of intracellular protein transport;BP:nuclear transport;BP:regulation of phosphate metabolic process;BP:regulation of primary metabolic process;BP:regulation of metabolic process;BP:regulation of transport;BP:regulation of intracellular transport;BP:regulation of RNA biosynthetic process;BP:signal transduction;BP:positive regulation of intracellular transport;BP:positive regulation …	GO:0033157;GO:0051169;GO:0019220;GO:0080090;GO:0019222;GO:0051049;GO:0032386;GO:2001141;GO:0007165;GO:0032388;GO:0010604;GO:0048869;GO:0060999;GO:0044093;GO:0044092;GO:0048518;GO:0051050;GO:0060255;GO:0045859;GO:0010976;GO:0010975;GO:0060142;GO:0042325;GO:0042327;GO:0019538;GO:0051223;GO:0060143;GO:0051252;GO:0009893;GO:0033674;GO:0051100;GO:0071902;GO:0035556;GO:0071900;GO:0050789;GO:0032091;GO:…	K08794	CAMK1	hsa04020;hsa04921;hsa04925;hsa05214	Calcium signaling pathway;Oxytocin signaling pathway;Aldosterone synthesis and secretion;Glioma	ENOG410XRMJ	T:Signal transduction mechanisms	PF00069.31;PF07714.23;PF14531.12	Pkinase;PK_Tyr_Ser-Thr;Kinase-like	Protein kinase domain;Protein tyrosine and serine/threonine kinase;Kinase-like	cytoplasmic
ENSP00000310226.6	RAB1B	Ras-related protein Rab-1B	81876	pep chromosome:GRCh38:11:66268639:66277492:1 gene:ENSG00000174903.16 transcript:ENST00000311481.11 gene_biotype:protein_coding transcript_biotype:protein_coding gene_symbol:RAB1B description:RAB1B, member RAS oncogene family [Source:HGNC Symbol;Acc:HGNC:18370]	2.1783	1.1232	0.03614	up	yes	278.034	127.636	161.721	135.48	77.6539	115.88	158.589	116.492	252.178	292.349	252.295	555.33	201.72	114.331	BP:protein localization;BP:cellular component organization or biogenesis;BP:cellular macromolecule localization;BP:cellular component organization;BP:nitrogen compound transport;BP:macromolecule localization;BP:cellular process;BP:autophagy;BP:transport;BP:Golgi organization;BP:establishment of protein localization;BP:biological_process;BP:metabolic process;BP:establishment of localization;BP:cat…	GO:0008104;GO:0071840;GO:0070727;GO:0016043;GO:0071705;GO:0033036;GO:0009987;GO:0006914;GO:0006810;GO:0007030;GO:0045184;GO:0008150;GO:0008152;GO:0051234;GO:0009056;GO:0051179;GO:0051641;GO:0006996;GO:0016192;GO:0015031;GO:0061919GO:0034045;GO:0016020;GO:0048471;GO:0110165;GO:0005575GO:0035639;GO:0003674;GO:0005488;GO:0098772;GO:1901363;GO:0043168;GO:0000166;GO:0032561;GO:1901265;GO:0017076;GO:00…	K07875	RAB1B	hsa05134	Legionellosis	ENOG410XQN5	S:Function unknown	PF00071.28;PF08477.19;PF00025.27;PF00009.33;PF01926.29	Ras;Roc;Arf;GTP_EFTU;MMR_HSR1	Ras family;Ras of Complex, Roc, domain of DAPkinase;ADP-ribosylation factor family;Elongation factor Tu GTP binding domain;50S ribosome-binding GTPase	cytoplasmic
ENSP00000280969.5	MAT2B	Methionine adenosyltransferase 2 subunit beta	27430	pep chromosome:GRCh38:5:163503114:163519336:1 gene:ENSG00000038274.18 transcript:ENST00000280969.9 gene_biotype:protein_coding transcript_biotype:protein_coding gene_symbol:MAT2B description:methionine adenosyltransferase 2 non-catalytic beta subunit [Source:HGNC Symbol;Acc:HGNC:6905]	2.0868	1.0613	0.009325	up	yes	268.866	128.838	249.467	66.9207	51.5455	105.377	156.75661644268	142.964	395.444	301.713	207.168	301.535	222.457	184.87855309375	BP:one-carbon metabolic process;BP:small molecule metabolic process;BP:dTDP-rhamnose metabolic process;BP:nucleobase-containing compound metabolic process;BP:extracellular polysaccharide biosynthetic process;BP:S-adenosylmethionine metabolic process;BP:nucleotide-sugar biosynthetic process;BP:nucleotide-sugar metabolic process;BP:cellular process;BP:biosynthetic process;BP:biological_process;BP:m…	GO:0006730;GO:0044281;GO:0046383;GO:0006139;GO:0045226;GO:0046500;GO:0009226;GO:0009225;GO:0009987;GO:0009058;GO:0008150;GO:0008152;GO:0034654;GO:0090407;GO:0055086;GO:0044238;GO:0044272;GO:0006556;GO:1901135;GO:1901137;GO:0006796;GO:0006790;GO:1901293;GO:0006793;GO:0019637;GO:0006753;GO:0019305GO:1990234;GO:0043229;GO:0048269;GO:0043227;GO:0043226;GO:0070062;GO:0005634;GO:0110165;GO:1902494;GO:0…	K00789	metK, MAT	hsa01230;hsa01100;hsa00270;hsa01240	Biosynthesis of amino acids;Metabolic pathways;Cysteine and methionine metabolism;Biosynthesis of cofactors	COG1091	M:Cell wall/membrane/envelope biogenesis	PF04321.23;PF01370.27;PF16363.11;PF02719.21	RmlD_sub_bind;Epimerase;GDP_Man_Dehyd;Polysacc_synt_2	RmlD substrate binding domain;NAD dependent epimerase/dehydratase family;GDP-mannose 4,6 dehydratase;Polysaccharide biosynthesis protein	nuclear
ENSP00000378442.4	SNCA	Alpha-synuclein	6622	pep chromosome:GRCh38:4:89724099:89837161:-1 gene:ENSG00000145335.17 transcript:ENST00000394991.8 gene_biotype:protein_coding transcript_biotype:protein_coding gene_symbol:SNCA description:synuclein alpha [Source:HGNC Symbol;Acc:HGNC:11138]	2.7642	1.4669	0.03701	up	yes	291.158	105.333	241.396	72.6065	42.8775	129.484	33.9443	111.68995333539	151.433	360.084	559.772	176.089	385.49	114.079	BP:regulation of secretion;BP:regulation of transport;BP:behavior;BP:cellular component organization or biogenesis;BP:cellular response to stimulus;BP:regulation of amine transport;BP:cellular response to copper ion;BP:presynaptic endocytosis;BP:response to chemical;BP:response to metal ion;BP:vesicle-mediated transport;BP:catecholamine biosynthetic process;BP:protein metabolic process;BP:anterog…	GO:0051046;GO:0051049;GO:0007610;GO:0071840;GO:0051716;GO:0051952;GO:0071280;GO:0140238;GO:0042221;GO:0010038;GO:0016192;GO:0042423;GO:0019538;GO:0098916;GO:0033554;GO:0050789;GO:0048488;GO:0016043;GO:0062197;GO:0065007;GO:0007626;GO:0009308;GO:0009309;GO:0006810;GO:0006584;GO:0006950;GO:0008150;GO:0008152;GO:0006576;GO:0050794;GO:0006897;GO:0050896;GO:0009713;GO:0099536;GO:0099537;GO:0050808;GO:…	K04528	SNCA	hsa05010;hsa05012;hsa05022	Alzheimer disease;Parkinson disease;Pathways of neurodegeneration - multiple diseases	ENOG4111TDZ	O:Posttranslational modification, protein turnover, chaperones	PF01387.22	Synuclein	Synuclein	cytoplasmic
ENSP00000341625.4	CYB5A	Cytochrome b5	1528	pep chromosome:GRCh38:18:74250846:74291963:-1 gene:ENSG00000166347.19 transcript:ENST00000340533.9 gene_biotype:protein_coding transcript_biotype:protein_coding gene_symbol:CYB5A description:cytochrome b5 type A [Source:HGNC Symbol;Acc:HGNC:2570]	4.0148	2.0053	0.005648	up	yes	316.5	78.834	128.311	0.1	0.1	0.1	76.9967	267.397	258.083	337.882	556.105	192.414	251.54924147338	302.96626091298	CC:endoplasmic reticulum membrane;CC:intracellular organelle;CC:membrane-bounded organelle;CC:organelle;CC:cellular_component;CC:organelle membrane;CC:membrane;CC:cellular anatomical entity;CC:organelle outer membrane;CC:bounding membrane of organelle;CC:mitochondrial membrane;CC:intracellular membrane-bounded organelle;CC:cytosol;CC:outer membrane;CC:mitochondrial outer membraneMF:oxidoreduction…	GO:0005789;GO:0043229;GO:0043227;GO:0043226;GO:0005575;GO:0031090;GO:0016020;GO:0110165;GO:0031968;GO:0098588;GO:0031966;GO:0043231;GO:0005829;GO:0019867;GO:0005741GO:0015453;GO:0019899;GO:0003674;GO:0005488;GO:0016491;GO:0015318;GO:0043167;GO:0015399;GO:0046872;GO:0004129;GO:0005515;GO:0020037;GO:0043169;GO:0005215;GO:0008324;GO:0036094;GO:0003824;GO:0009055;GO:0022890;GO:0046906;GO:0097159;GO:0…	K23490	CYB5	------	------	COG5274;COG5274	C:Energy production and conversion;I:Lipid transport and metabolism	PF00173.33	Cyt-b5	Cytochrome b5-like Heme/Steroid binding domain	cytoplasmic
ENSP00000368390.4	TPD52	Tumor protein D52	7163	pep chromosome:GRCh38:8:80034745:80171558:-1 gene:ENSG00000076554.16 transcript:ENST00000379096.9 gene_biotype:protein_coding transcript_biotype:protein_coding gene_symbol:TPD52 description:tumor protein D52 [Source:HGNC Symbol;Acc:HGNC:12005]	12.7684	3.6745	0.00781	up	yes	353.526	27.6876	165.626	0.1	0.1	0.1	0.1	0.1	117.932	137.613	454.105	740.227	383.30902631339	287.97084256479	BP:cell differentiation;BP:B cell activation;BP:leukocyte activation;BP:multicellular organismal process;BP:anatomical structure morphogenesis;BP:cellular developmental process;BP:developmental process;BP:transport;BP:B cell differentiation;BP:mononuclear cell differentiation;BP:cellular process;BP:cell activation;BP:lymphocyte activation;BP:biological_process;BP:establishment of localization;BP:…	GO:0030154;GO:0042113;GO:0045321;GO:0032501;GO:0009653;GO:0048869;GO:0032502;GO:0006810;GO:0030183;GO:1903131;GO:0009987;GO:0001775;GO:0046649;GO:0008150;GO:0051234;GO:0051179;GO:0002521;GO:0046903;GO:0002376;GO:0030098GO:0005783;GO:0043229;GO:0043227;GO:0043226;GO:0005737;GO:0005575;GO:0048471;GO:0110165;GO:0043231GO:0003674;GO:0005488;GO:0043167;GO:0043169;GO:0005509;GO:0046872;GO:0042803;GO:00…	------	------	------	------	ENOG4111M9H	S:Function unknown	PF04201.20	TPD52	Tumour protein D52 family	cytoplasmic
ENSP00000238618.3	ACYP1	Acylphosphatase-1	97	pep chromosome:GRCh38:14:75053243:75064024:-1 gene:ENSG00000119640.9 transcript:ENST00000238618.8 gene_biotype:protein_coding transcript_biotype:protein_coding gene_symbol:ACYP1 description:acylphosphatase 1 [Source:HGNC Symbol;Acc:HGNC:179]	2.1704	1.118	0.03466	up	yes	259.313	119.478	167.319	115.873	124.04664952978	133.919	61.6146	114.096	269.714	527.555	182.211	183.83961389669	177.36015987166	215.196	BP:cellular process;BP:phosphate-containing compound metabolic process;BP:biological_process;BP:metabolic process;BP:phosphorus metabolic processMF:hydrolase activity;MF:hydrolase activity, acting on acid anhydrides, in phosphorus-containing anhydrides;MF:catalytic activity;MF:hydrolase activity, acting on acid anhydrides;MF:pyrophosphatase activity;MF:acylphosphatase activity;MF:molecular_functi…	GO:0009987;GO:0006796;GO:0008150;GO:0008152;GO:0006793GO:0016787;GO:0016818;GO:0003824;GO:0016817;GO:0016462;GO:0003998;GO:0003674	K01512	acyP	hsa00620;hsa01100	Pyruvate metabolism;Metabolic pathways	ENOG41126ER	O:Posttranslational modification, protein turnover, chaperones	PF00708.24	Acylphosphatase	Acylphosphatase	cytoplasmic
ENSP00000479304.2	IGHV1-69-2	Immunoglobulin heavy variable 1-69-2	-	pep scaffold:GRCh38:HSCHR14_3_CTG1:1228789:1229226:-1 gene:ENSG00000275148.2 transcript:ENST00000615784.2 gene_biotype:IG_V_gene transcript_biotype:IG_V_gene gene_symbol:IGHV1-69-2 description:immunoglobulin heavy variable 1-69-2 [Source:HGNC Symbol;Acc:HGNC:5562]	0.02988	-5.0647	0.0007302	down	yes	10.9386	366.027	221.848	420.03567335521	536.63430119504	83.3424	404.34495831969	529.95887478973	65.1314	0.1	0.1	0.1	0.1	0.1	BP:immune system process;BP:response to stimulus;BP:biological_process;BP:adaptive immune response;BP:immune responseCC:membrane;CC:macromolecular complex;CC:plasma membrane;CC:cellular_component;CC:extracellular region;CC:immunoglobulin complex;CC:cellular anatomical entity	GO:0002376;GO:0050896;GO:0008150;GO:0002250;GO:0006955GO:0016020;GO:0032991;GO:0005886;GO:0005575;GO:0005576;GO:0019814;GO:0110165	K06856	IGH	hsa05130;hsa04666;hsa04613;hsa04650;hsa04020;hsa05330;hsa04672;hsa04145;hsa05310;hsa04064;hsa05414;hsa05416;hsa05135;hsa05143;hsa05140;hsa05146;hsa05169;hsa05322;hsa05323;hsa05320;hsa05202;hsa04662;hsa04072;hsa04664;hsa04640;hsa05340;hsa04151;hsa05150;hsa05152;hsa05171	Pathogenic Escherichia coli infection;Fc gamma R-mediated phagocytosis;Neutrophil extracellular trap formation;Natural killer cell mediated cytotoxicity;Calcium signaling pathway;Allograft rejection;Intestinal immune network for IgA production;Phagosome;Asthma;NF-kappa B signaling pathway;Dilated cardiomyopathy;Viral myocarditis;Yersinia infection;African trypanosomiasis;Leishmaniasis;Amoebiasis;…	ENOG4111YE0	S:Function unknown	PF07686.23	V-set	Immunoglobulin V-set domain	extracellular
ENSP00000332806.3	EMILIN3	EMILIN-3	90187	pep chromosome:GRCh38:20:41359962:41366818:-1 gene:ENSG00000183798.5 transcript:ENST00000332312.4 gene_biotype:protein_coding transcript_biotype:protein_coding gene_symbol:EMILIN3 description:elastin microfibril interfacer 3 [Source:HGNC Symbol;Acc:HGNC:16123]	0.4395	-1.1861	0.005112	down	yes	114.163	259.776	246.336	423.864	161.988	273.619	213.13243519339	239.714	76.4446	99.4828	163.797	62.9142	106.978	175.362	CC:cytoplasm;CC:cellular_component;CC:external encapsulating structure;CC:collagen-containing extracellular matrix;CC:cellular anatomical entity;CC:extracellular region;CC:extracellular matrixMF:extracellular matrix structural constituent;MF:identical protein binding;MF:extracellular matrix constituent conferring elasticity;MF:structural molecule activity;MF:molecular_function;MF:protein binding;…	GO:0005737;GO:0005575;GO:0030312;GO:0062023;GO:0110165;GO:0005576;GO:0031012GO:0005201;GO:0042802;GO:0030023;GO:0005198;GO:0003674;GO:0005515;GO:0097493;GO:0005488	K24246	EMILIN	------	------	ENOG4110DGR	S:Function unknown	PF07546.18	EMI	EMI domain	plasma membrane
ENSP00000356602.3	VTA1	Vacuolar protein sorting-associated protein VTA1 homolog	51534	pep chromosome:GRCh38:6:142147263:142224685:1 gene:ENSG00000009844.16 transcript:ENST00000367630.9 gene_biotype:protein_coding transcript_biotype:protein_coding gene_symbol:VTA1 description:vesicle trafficking 1 [Source:HGNC Symbol;Acc:HGNC:20954]	2.6848	1.4248	0.03389	up	yes	272.167	101.375	193.484	83.9646	12.3864	105.407	118.15880669514	94.8468	332.203	487.549	401.893	165.749	173.967	71.6401	BP:late endosome to vacuole transport via multivesicular body sorting pathway;BP:cellular component assembly;BP:ESCRT III complex disassembly;BP:macromolecular complex subunit organization;BP:macroautophagy;BP:protein localization;BP:nitrogen compound transport;BP:late endosome to vacuole transport;BP:cellular component organization or biogenesis;BP:endosome organization;BP:macromolecular complex…	GO:0032511;GO:0022607;GO:1904903;GO:0043933;GO:0016236;GO:0008104;GO:0071705;GO:0045324;GO:0071840;GO:0007032;GO:0032984;GO:0070925;GO:0070727;GO:0016043;GO:0071985;GO:0033036;GO:0006996;GO:0032509;GO:0036258;GO:0036257;GO:0006914;GO:0006810;GO:0045184;GO:0008150;GO:0007034;GO:0008152;GO:0051649;GO:0051234;GO:0009056;GO:0051179;GO:0051641;GO:0016197;GO:0016192;GO:0046907;GO:0016050;GO:0022411;GO:…	K12199	VTA1, LIP5	hsa04144	Endocytosis	ENOG4111H3M	U:Intracellular trafficking, secretion, and vesicular transport	PF04652.21;PF18097.6	Vta1;Vta1_C	Vta1 like;Vta1 C-terminal domain	cytoplasmic
ENSP00000256383.4	EIF2S1	Eukaryotic translation initiation factor 2 subunit 1	1965	pep chromosome:GRCh38:14:67360328:67386516:1 gene:ENSG00000134001.15 transcript:ENST00000256383.11 gene_biotype:protein_coding transcript_biotype:protein_coding gene_symbol:EIF2S1 description:eukaryotic translation initiation factor 2 subunit alpha [Source:HGNC Symbol;Acc:HGNC:3265]	2.1552	1.1078	0.04813	up	yes	248.897	115.487	145.366	86.9602	262.682	53.9699	55.2926	88.652421024699	340.405	422.376	284.384	200.49	128.749	116.975	BP:regulation of primary metabolic process;BP:regulation of metabolic process;BP:response to manganese-induced endoplasmic reticulum stress;BP:cellular response to heat;BP:signal transduction;BP:cellular response to amino acid starvation;BP:response to manganese ion;BP:cellular component organization or biogenesis;BP:response to amino acid;BP:cellular response to stimulus;BP:negative regulation o…	GO:0080090;GO:0019222;GO:1990737;GO:0034605;GO:0007165;GO:0034198;GO:0010042;GO:0071840;GO:0043200;GO:0051716;GO:0010605;GO:0010608;GO:0006979;GO:0048518;GO:0048519;GO:0060255;GO:0006446;GO:1904035;GO:0010038;GO:0031669;GO:0030968;GO:0071287;GO:0019538;GO:0031667;GO:0043068;GO:0033554;GO:0022607;GO:0009892;GO:0009890;GO:0034063;GO:0008152;GO:0035556;GO:0016043;GO:0062197;GO:2000674;GO:0065007;GO:…	K03237	EIF2S1	hsa04932;hsa05010;hsa05020;hsa05014;hsa04141;hsa04140;hsa04137;hsa05168;hsa05012;hsa05022;hsa05164;hsa04210;hsa05160;hsa05162;hsa05417	Non-alcoholic fatty liver disease;Alzheimer disease;Prion disease;Amyotrophic lateral sclerosis;Protein processing in endoplasmic reticulum;Autophagy - animal;Mitophagy - animal;Herpes simplex virus 1 infection;Parkinson disease;Pathways of neurodegeneration - multiple diseases;Influenza A;Apoptosis;Hepatitis C;Measles;Lipid and atherosclerosis	COG1093	J:Translation, ribosomal structure and biogenesis	PF07541.17;PF00575.29	EIF_2_alpha;S1	Eukaryotic translation initiation factor 2 alpha subunit;S1 RNA binding domain	cytoplasmic
ENSP00000263212.5	PPM1F	Protein phosphatase 1F	9647	pep chromosome:GRCh38:22:21919425:21952848:-1 gene:ENSG00000100034.14 transcript:ENST00000263212.10 gene_biotype:protein_coding transcript_biotype:protein_coding gene_symbol:PPM1F description:protein phosphatase, Mg2+/Mn2+ dependent 1F [Source:HGNC Symbol;Acc:HGNC:19388]	2.1946	1.134	0.02508	up	yes	244.424	111.377	216.301	102.936	75.380258254863	65.1018	95.190464185863	113.355	220.237	406.655	356.461	175.39628869842	179.134	128.66265009626	BP:negative regulation of transferase activity;BP:regulation of phosphate metabolic process;BP:regulation of primary metabolic process;BP:regulation of metabolic process;BP:positive regulation of cell junction assembly;BP:regulation of transport;BP:positive regulation of response to stimulus;BP:regulation of response to stimulus;BP:negative regulation of cell adhesion;BP:regulation of chemotaxis;…	GO:0051348;GO:0019220;GO:0080090;GO:0019222;GO:1901890;GO:0051049;GO:0048584;GO:0048583;GO:0007162;GO:0050920;GO:0007165;GO:0051893;GO:0051894;GO:0032231;GO:0051716;GO:0032233;GO:0010605;GO:0010604;GO:0045785;GO:0051496;GO:0051495;GO:0033043;GO:0051493;GO:0051492;GO:0044092;GO:0048518;GO:0048519;GO:0010634;GO:0051051;GO:1901888;GO:0060255;GO:0045859;GO:2001141;GO:0042325;GO:0042326;GO:0010632;GO:…	K17502	PPM1F, POPX2	------	------	COG0631	O:Posttranslational modification, protein turnover, chaperones	PF00481.26;PF13672.11	PP2C;PP2C_2	Protein phosphatase 2C;Protein phosphatase 2C	cytoplasmic
ENSP00000265447.5	ANXA11	Annexin A11	311	pep chromosome:GRCh38:10:80155124:80172871:-1 gene:ENSG00000122359.18 transcript:ENST00000265447.8 gene_biotype:protein_coding transcript_biotype:protein_coding gene_symbol:ANXA11 description:annexin A11 [Source:HGNC Symbol;Acc:HGNC:535]	2.2174	1.1489	0.01856	up	yes	243.387	109.761	190.889	59.071	89.271277216707	127.693	72.6731	118.97050589902	205.652	327.33	416.613	176.318	199.108	135.3	BP:phagocytosis;BP:cellular process;BP:cytokinetic process;BP:transport;BP:biological_process;BP:response to metal ion;BP:response to chemical;BP:establishment of localization;BP:localization;BP:response to calcium ion;BP:endocytosis;BP:vesicle-mediated transport;BP:cell cycle process;BP:import into cell;BP:response to stimulusCC:cytosol;CC:melanosome;CC:pigment granule;CC:extracellular matrix;CC…	GO:0006909;GO:0009987;GO:0032506;GO:0006810;GO:0008150;GO:0010038;GO:0042221;GO:0051234;GO:0051179;GO:0051592;GO:0006897;GO:0016192;GO:0022402;GO:0098657;GO:0050896GO:0005829;GO:0042470;GO:0048770;GO:0031012;GO:0030139;GO:0043229;GO:0043228;GO:0000323;GO:0043227;GO:0043226;GO:0005737;GO:0016020;GO:0005819;GO:0005773;GO:0031410;GO:0005635;GO:0005654;GO:0031982;GO:0110165;GO:0099503;GO:0030141;GO:0…	K17095	ANXA7_11	hsa05014	Amyotrophic lateral sclerosis	ENOG410XPUN	O:Posttranslational modification, protein turnover, chaperones	PF00191.25	Annexin	Annexin	cytoplasmic
ENSP00000348786.1	RAP1A	Ras-related protein Rap-1A	282031	pep chromosome:GRCh38:1:111542218:111713113:1 gene:ENSG00000116473.15 transcript:ENST00000356415.5 gene_biotype:protein_coding transcript_biotype:protein_coding gene_symbol:RAP1A description:RAP1A, member of RAS oncogene family [Source:HGNC Symbol;Acc:HGNC:9855]	18.724	4.2268	7.247E-5	up	yes	318.722	17.0221	101.632	0.1	0.1	0.1	0.1	0.1	321.193	480.57249455306	337.834	370.187	204.545	197.999	BP:regulation of MAPK cascade;BP:protein localization;BP:regulation of phosphate metabolic process;BP:positive regulation of Fc-gamma receptor signaling pathway involved in phagocytosis;BP:regulation of metabolic process;BP:negative regulation of secretion;BP:regulation of transport;BP:positive regulation of response to stimulus;BP:regulation of response to stimulus;BP:signal transduction;BP:cell…	GO:0043408;GO:0008104;GO:0019220;GO:1905451;GO:0019222;GO:0051048;GO:0051049;GO:0048584;GO:0048583;GO:0007165;GO:0007166;GO:0034764;GO:0014074;GO:0061028;GO:0034762;GO:0031346;GO:0051716;GO:0070727;GO:0009966;GO:0009967;GO:0070848;GO:0048513;GO:0044093;GO:0099177;GO:0048518;GO:0065007;GO:0033036;GO:0002064;GO:0032486;GO:0099003;GO:0038179;GO:0051051;GO:0051050;GO:0060255;GO:0048468;GO:0045859;GO:…	K04353	RAP1A	hsa04972;hsa04611;hsa04722;hsa04014;hsa05211;hsa04024;hsa04530;hsa04720;hsa04015;hsa04670;hsa04510;hsa04010;hsa04934;hsa04520;hsa04062;hsa05417	Pancreatic secretion;Platelet activation;Neurotrophin signaling pathway;Ras signaling pathway;Renal cell carcinoma;cAMP signaling pathway;Tight junction;Long-term potentiation;Rap1 signaling pathway;Leukocyte transendothelial migration;Focal adhesion;MAPK signaling pathway;Cushing syndrome;Adherens junction;Chemokine signaling pathway;Lipid and atherosclerosis	COG1100	J:Translation, ribosomal structure and biogenesis	PF00071.28;PF08477.19;PF00025.27;PF00009.33	Ras;Roc;Arf;GTP_EFTU	Ras family;Ras of Complex, Roc, domain of DAPkinase;ADP-ribosylation factor family;Elongation factor Tu GTP binding domain	cytoplasmic
ENSP00000379374.3	FKBP3	Peptidyl-prolyl cis-trans isomerase FKBP3	2287	pep chromosome:GRCh38:14:45115599:45134481:-1 gene:ENSG00000100442.11 transcript:ENST00000396062.4 gene_biotype:protein_coding transcript_biotype:protein_coding gene_symbol:FKBP3 description:FKBP prolyl isomerase 3 [Source:HGNC Symbol;Acc:HGNC:3719]	2.0335	1.024	0.01666	up	yes	221.553	108.953	119.702	102.216	105.08302456591	101.359	155.51847942838	69.8424	279.927	177.924	376.614	119.027	180.534	195.29	CC:intracellular organelle;CC:membrane-bounded organelle;CC:organelle;CC:nucleus;CC:cellular anatomical entity;CC:intracellular membrane-bounded organelle;CC:cellular_componentMF:signaling receptor activity;MF:molecular transducer activity;MF:molecular_function;MF:binding;MF:nucleic acid binding;MF:FK506 binding;MF:peptidyl-prolyl cis-trans isomerase activity;MF:macrolide binding;MF:amide binding…	GO:0043229;GO:0043227;GO:0043226;GO:0005634;GO:0110165;GO:0043231;GO:0005575GO:0038023;GO:0060089;GO:0003674;GO:0005488;GO:0003676;GO:0005528;GO:0003755;GO:0005527;GO:0033218;GO:0140096;GO:0003824;GO:0016853;GO:0097159;GO:0016859;GO:0003723	K09570	FKBP3	------	------	COG0545	S:Function unknown	PF18410.7;PF00254.34	BTHB;FKBP_C	Basic tilted helix bundle domain;FKBP-type peptidyl-prolyl cis-trans isomerase	nuclear
ENSP00000363392.3	SNX12	Sorting nexin-12	29934	pep chromosome:GRCh38:X:71059247:71068334:-1 gene:ENSG00000147164.12 transcript:ENST00000374274.8 gene_biotype:protein_coding transcript_biotype:protein_coding gene_symbol:SNX12 description:sorting nexin 12 [Source:HGNC Symbol;Acc:HGNC:14976]	2.5067	1.3258	0.04203	up	yes	230.21	91.8383	45.8464	138.724	87.9486	125.258	95.673	57.5792	293.886	209.064	473.841	146.283	191.531	66.6572	BP:protein localization;BP:regulation of primary metabolic process;BP:regulation of metabolic process;BP:regulation of transport;BP:regulation of intracellular transport;BP:negative regulation of intracellular transport;BP:negative regulation of macromolecule metabolic process;BP:cellular macromolecule localization;BP:negative regulation of biological process;BP:macromolecule localization;BP:nega…	GO:0008104;GO:0080090;GO:0019222;GO:0051049;GO:0032386;GO:0032387;GO:0010605;GO:0070727;GO:0048519;GO:0033036;GO:0051051;GO:0060255;GO:0045184;GO:0030162;GO:0051668;GO:0016192;GO:0016197;GO:0009894;GO:0009895;GO:0009892;GO:0009890;GO:0010629;GO:0051223;GO:0051224;GO:0065007;GO:0032880;GO:2000642;GO:2000641;GO:0070201;GO:0006810;GO:0009889;GO:0050794;GO:0008150;GO:0051234;GO:0034499;GO:0070613;GO:…	K17918	SNX3_12	hsa04144	Endocytosis	COG5391	A:RNA processing and modification	PF00787.29	PX	PX domain	cytoplasmic
ENSP00000000233.5	ARF5	ADP-ribosylation factor 5	381	pep chromosome:GRCh38:7:127588411:127591700:1 gene:ENSG00000004059.11 transcript:ENST00000000233.10 gene_biotype:protein_coding transcript_biotype:protein_coding gene_symbol:ARF5 description:ADP ribosylation factor 5 [Source:HGNC Symbol;Acc:HGNC:658]	7.077	2.8231	0.02091	up	yes	280.56	39.6441	237.365	0.1	0.1	0.1	0.1	0.1	187.468	338.902	647.074	175.10112779804	200.84726512255	133.96929692378	BP:protein localization;BP:cellular localization;BP:cellular macromolecule localization;BP:intracellular protein transport;BP:nitrogen compound transport;BP:macromolecule localization;BP:cellular process;BP:Golgi vesicle transport;BP:transport;BP:establishment of protein localization;BP:biological_process;BP:establishment of localization in cell;BP:establishment of localization;BP:localization;BP…	GO:0008104;GO:0051641;GO:0070727;GO:0006886;GO:0071705;GO:0033036;GO:0009987;GO:0048193;GO:0006810;GO:0045184;GO:0008150;GO:0051649;GO:0051234;GO:0051179;GO:0016192;GO:0006890;GO:0046907;GO:0015031GO:0005886;GO:0043229;GO:0043227;GO:0043226;GO:0016020;GO:0110165;GO:0005794;GO:0043231;GO:0005575GO:0016787;GO:0035639;GO:1901363;GO:0003674;GO:0005488;GO:0019001;GO:1901265;GO:0043168;GO:0000166;GO:00…	K07940	ARF5	hsa04144	Endocytosis	COG1100	S:Function unknown	PF00025.27;PF08477.19;PF09439.16;PF00503.26;PF00071.28;PF04670.18	Arf;Roc;SRPRB;G-alpha;Ras;Gtr1_RagA	ADP-ribosylation factor family;Ras of Complex, Roc, domain of DAPkinase;Signal recognition particle receptor beta subunit;G-protein alpha subunit;Ras family;Gtr1/RagA G protein conserved region	mitochondrial
ENSP00000385657.1	PPP1R7	Protein phosphatase 1 regulatory subunit 7	5510	pep chromosome:GRCh38:2:241149638:241183024:1 gene:ENSG00000115685.15 transcript:ENST00000407025.5 gene_biotype:protein_coding transcript_biotype:protein_coding gene_symbol:PPP1R7 description:protein phosphatase 1 regulatory subunit 7 [Source:HGNC Symbol;Acc:HGNC:9295]	2.2504	1.1702	0.03609	up	yes	214.91	95.4983	66.9596	86.978	132.174	120.31	121.971	44.597	251.854	385.928	272.949	117.828	198.492	62.4114	BP:cell cycle process;BP:cellular process;BP:biological_process;BP:chromosome segregation;BP:positive regulation of protein dephosphorylationCC:intracellular organelle;CC:non-membrane-bounded organelle;CC:membrane-bounded organelle;CC:organelle;CC:cytoplasm;CC:extracellular exosome;CC:nucleus;CC:chromosome;CC:cellular anatomical entity;CC:extracellular vesicle;CC:vesicle;CC:extracellular organell…	GO:0022402;GO:0009987;GO:0008150;GO:0007059;GO:0035307GO:0043229;GO:0043228;GO:0043227;GO:0043226;GO:0005737;GO:0070062;GO:0005634;GO:0005694;GO:0110165;GO:1903561;GO:0031982;GO:0043230;GO:0043231;GO:0043232;GO:0005575;GO:0065010GO:0019208;GO:0098772;GO:0019888;GO:0030234;GO:0003674	K17550	PPP1R7, SDS22	------	------	COG4886	O:Posttranslational modification, protein turnover, chaperones	PF12799.13;PF14580.12;PF13855.12;PF23598.1;PF23952.1	LRR_4;LRR_9;LRR_8;LRR_14;LRR_EndoS	Leucine Rich repeats;Leucine-rich repeat;Leucine rich repeat;Leucine-rich repeat region;Endo-beta-N-acetylglucosaminidase EndoS LRR domain	nuclear
ENSP00000297933.6	GAPVD1	GTPase-activating protein and VPS9 domain-containing protein 1	26130	pep chromosome:GRCh38:9:125261826:125367207:1 gene:ENSG00000165219.23 transcript:ENST00000297933.11 gene_biotype:protein_coding transcript_biotype:protein_coding gene_symbol:GAPVD1 description:GTPase activating protein and VPS9 domains 1 [Source:HGNC Symbol;Acc:HGNC:23375]	5.1377	2.3611	0.008519	up	yes	251.246	48.9025	184.457	0.1	0.1	108.558	0.1	0.1	175.482	413.265	412.348	154.113	227.02835902522	125.23774058258	BP:regulation of cellular localization;BP:regulation of transport;BP:regulation of localization;BP:regulation of protein localization;BP:regulation of biological process;BP:biological regulation;BP:regulation of establishment of protein localization;BP:cellular process;BP:transport;BP:regulation of cellular process;BP:biological_process;BP:establishment of localization;BP:localization;BP:endocyto…	GO:0060341;GO:0051049;GO:0032879;GO:0032880;GO:0050789;GO:0065007;GO:0070201;GO:0009987;GO:0006810;GO:0050794;GO:0008150;GO:0051234;GO:0051179;GO:0006897;GO:0016192;GO:0051223;GO:0098657GO:0030139;GO:0043229;GO:0043227;GO:0043226;GO:0031982;GO:0031410;GO:0016020;GO:0110165;GO:0097708;GO:0005886;GO:0043231;GO:0005829;GO:0005575;GO:0005768GO:0032794;GO:0005085;GO:0019899;GO:0031267;GO:0003674;GO:00…	K27566	GAPVD1	------	------	ENOG410XRXX	S:Function unknown	PF00616.24;PF02204.23;PF18151.6	RasGAP;VPS9;DUF5601	GTPase-activator protein for Ras-like GTPase;Vacuolar sorting protein 9;Domain of unknown function	cytoplasmic
ENSP00000339186.4	GRAP2	GRB2-related adapter protein 2	9402	pep chromosome:GRCh38:22:39901084:39973721:1 gene:ENSG00000100351.17 transcript:ENST00000344138.9 gene_biotype:protein_coding transcript_biotype:protein_coding gene_symbol:GRAP2 description:GRB2 related adaptor protein 2 [Source:HGNC Symbol;Acc:HGNC:4563]	2.1693	1.1172	0.01757	up	yes	200.434	92.396	166.105	140.089	71.9478	55.7792	86.8527	33.6019	217.893	328.309	211.503	116.511	209.127	119.26399697324	BP:regulation of signaling;BP:regulation of response to stimulus;BP:signaling;BP:signal transduction;BP:intracellular signal transduction;BP:regulation of cell communication;BP:regulation of biological process;BP:regulation of MAPK cascade;BP:regulation of intracellular signal transduction;BP:regulation of signal transduction;BP:biological regulation;BP:cellular process;BP:regulation of cellular …	GO:0023051;GO:0048583;GO:0023052;GO:0007165;GO:0035556;GO:0010646;GO:0050789;GO:0043408;GO:1902531;GO:0009966;GO:0065007;GO:0009987;GO:0050794;GO:0008150;GO:0007267;GO:0007154;GO:0007265;GO:0007264GO:0043229;GO:0043227;GO:0005737;GO:0031982;GO:0031410;GO:0005634;GO:0016020;GO:0043226;GO:0005654;GO:0110165;GO:0097708;GO:0005886;GO:0043231;GO:0005829;GO:0005575;GO:0005768GO:0045309;GO:0051219;GO:00…	K07366	GRAP2, GADS	hsa04660	T cell receptor signaling pathway	ENOG410XR1G	T:Signal transduction mechanisms	PF00018.34;PF14604.12;PF00017.30;PF07653.23	SH3_1;SH3_9;SH2;SH3_2	SH3 domain;Variant SH3 domain;SH2 domain;Variant SH3 domain	cytoplasmic
ENSP00000304592.2	FASN	Fatty acid synthase	2194	pep chromosome:GRCh38:17:82078338:82098236:-1 gene:ENSG00000169710.9 transcript:ENST00000306749.4 gene_biotype:protein_coding transcript_biotype:protein_coding gene_symbol:FASN description:fatty acid synthase [Source:HGNC Symbol;Acc:HGNC:3594]	2.3321	1.2216	0.004686	up	yes	204.208	87.5646	130.679	104.518	76.1382	76.0668	78.9174	59.0675	213.54	319.411	255.424	123.849	177.179	135.844	BP:monocyte differentiation;BP:ether metabolic process;BP:cell development;BP:neutrophil differentiation;BP:small molecule metabolic process;BP:small molecule biosynthetic process;BP:myeloid leukocyte differentiation;BP:establishment of endothelial barrier;BP:cellular developmental process;BP:interspecies interaction between organisms;BP:glandular epithelial cell development;BP:granulocyte differ…	GO:0030224;GO:0018904;GO:0048468;GO:0030223;GO:0044281;GO:0044283;GO:0002573;GO:0061028;GO:0048869;GO:0044419;GO:0002068;GO:0030851;GO:0046504;GO:0006662;GO:0002066;GO:0002064;GO:0032787;GO:0043436;GO:0051702;GO:0016053;GO:0044788;GO:0090557;GO:0006629;GO:0071353;GO:0030879;GO:0034097;GO:1903131;GO:0006952;GO:0006950;GO:0008150;GO:0006954;GO:0002521;GO:0046394;GO:0050896;GO:1901503;GO:0006633;GO:…	K00665	FASN	hsa01212;hsa01100;hsa00061;hsa04910;hsa04936;hsa04152	Fatty acid metabolism;Metabolic pathways;Fatty acid biosynthesis;Insulin signaling pathway;Alcoholic liver disease;AMPK signaling pathway	COG3321	Q:Secondary metabolites biosynthesis, transport and catabolism	PF00698.26;PF00109.32;PF00975.26;PF08659.16;PF16197.11;PF02801.28;PF21149.3;PF00107.32;PF13602.12;PF08242.18;PF21089.3;PF00550.31;PF00106.31;PF13847.12	Acyl_transf_1;ketoacyl-synt;Thioesterase;KR;KAsynt_C_assoc;Ketoacyl-synt_C;FAS_pseudo-KR;ADH_zinc_N;ADH_zinc_N_2;Methyltransf_12;PKS_DH_N;PP-binding;adh_short;Methyltransf_31	Acyl transferase domain;Beta-ketoacyl synthase, N-terminal domain;Thioesterase domain;KR domain;Ketoacyl-synthetase C-terminal extension;Beta-ketoacyl synthase, C-terminal domain;Fatty acid synthase, pseudo-KR domain;Zinc-binding dehydrogenase;Zinc-binding dehydrogenase;Methyltransferase domain;Polyketide synthase dehydratase domain;Phosphopantetheine attachment site;short chain dehydrogenase;Met…	cytoplasmic
ENSP00000352222.4	CTPS2	CTP synthase 2	56474	pep chromosome:GRCh38:X:16587999:16712669:-1 gene:ENSG00000047230.15 transcript:ENST00000359276.9 gene_biotype:protein_coding transcript_biotype:protein_coding gene_symbol:CTPS2 description:CTP synthase 2 [Source:HGNC Symbol;Acc:HGNC:2520]	74.2372	6.2141	1.996E-6	up	yes	283.705	3.8216	22.4296	0.1	0.1	0.1	0.1	0.1	204.937	198.64868613379	282.461	359.108	304.66841783163	352.40582494925	BP:pyrimidine nucleoside triphosphate biosynthetic process;BP:pyrimidine ribonucleotide metabolic process;BP:nucleoside triphosphate metabolic process;BP:nucleoside triphosphate biosynthetic process;BP:carboxylic acid metabolic process;BP:pyrimidine nucleoside triphosphate metabolic process;BP:pyrimidine-containing compound biosynthetic process;BP:nucleotide biosynthetic process;BP:small molecule…	GO:0009148;GO:0009218;GO:0009141;GO:0009142;GO:0019752;GO:0009147;GO:0072528;GO:0009165;GO:0044281;GO:0009064;GO:0046112;GO:0009259;GO:0072527;GO:0006220;GO:0006139;GO:0019856;GO:0006206;GO:0006520;GO:0006541;GO:0009199;GO:0006241;GO:0043436;GO:1901605;GO:0009987;GO:0009201;GO:0006221;GO:0046036;GO:0009220;GO:0009209;GO:0009208;GO:0009260;GO:0009058;GO:0009117;GO:0008152;GO:0034654;GO:0090407;GO:…	K01937	pyrG, CTPS	hsa01100;hsa01232;hsa00240;hsa01240	Metabolic pathways;Nucleotide metabolism;Pyrimidine metabolism;Biosynthesis of cofactors	COG0504	S:Function unknown	PF06418.20;PF00117.34;PF07722.19	CTP_synth_N;GATase;Peptidase_C26	CTP synthase N-terminus;Glutamine amidotransferase class-I;Peptidase C26	cytoplasmic
ENSP00000274341.4	HAPLN1	Hyaluronan and proteoglycan link protein 1	1404	pep chromosome:GRCh38:5:83637805:83720855:-1 gene:ENSG00000145681.11 transcript:ENST00000274341.9 gene_biotype:protein_coding transcript_biotype:protein_coding gene_symbol:HAPLN1 description:hyaluronan and proteoglycan link protein 1 [Source:HGNC Symbol;Acc:HGNC:2380]	0.4264	-1.2297	0.0003136	down	yes	85.9242	201.494	267.422	165.492	215.15478339312	149.624	182.102	229.16790197207	103.77	92.541355000992	73.6933	34.437	93.5252	117.57876226949	BP:regulation of cell proliferation;BP:cell differentiation;BP:positive regulation of cell proliferation;BP:skeletal system development;BP:glial cell differentiation;BP:regulation of biological process;BP:central nervous system development;BP:immune system process;BP:response to external biotic stimulus;BP:positive regulation of nervous system development;BP:cellular developmental process;BP:posi…	GO:0042127;GO:0030154;GO:0008284;GO:0001501;GO:0010001;GO:0050789;GO:0007417;GO:0002376;GO:0043207;GO:0051962;GO:0048869;GO:0051240;GO:0050769;GO:0044419;GO:0051960;GO:0065007;GO:1902692;GO:0010720;GO:0048518;GO:2000179;GO:0032502;GO:0050767;GO:0050793;GO:0045087;GO:0009987;GO:0006952;GO:0006950;GO:0008150;GO:0051239;GO:0006955;GO:0007155;GO:0050794;GO:0051707;GO:0098542;GO:0045597;GO:0009607;GO:…	K06848	HAPLN1, CRTL1	------	------	ENOG410XRS8	O:Posttranslational modification, protein turnover, chaperones	PF00193.23;PF07686.23	Xlink;V-set	Extracellular link domain;Immunoglobulin V-set domain	lysosomal
ENSP00000401306.1	FSIP2	Fibrous sheath-interacting protein 2	401024	pep chromosome:GRCh38:2:185738804:185833290:1 gene:ENSG00000188738.16 transcript:ENST00000424728.6 gene_biotype:protein_coding transcript_biotype:protein_coding gene_symbol:FSIP2 description:fibrous sheath interacting protein 2 [Source:HGNC Symbol;Acc:HGNC:21675]	10.306	3.3654	0.04218	up	yes	260.583	25.2846	0.1	151.207	0.1	0.1	0.1	0.1	215.02826878502	161.685	746.063	120.442	165.189	155.09354426324	BP:protein localization;BP:protein localization to cilium;BP:microtubule cytoskeleton organization;BP:cilium movement;BP:cellular component organization or biogenesis;BP:axoneme assembly;BP:cellular component organization;BP:cilium-dependent cell motility;BP:macromolecule localization;BP:developmental process;BP:cellular component assembly;BP:flagellated sperm motility;BP:cellular process;BP:repr…	GO:0008104;GO:0061512;GO:0000226;GO:0003341;GO:0071840;GO:0035082;GO:0016043;GO:0060285;GO:0033036;GO:0032502;GO:0022607;GO:0030317;GO:0009987;GO:0022414;GO:0001539;GO:0097722;GO:0007288;GO:0051179;GO:0051641;GO:0006996;GO:0007017;GO:0007010;GO:0048870;GO:0001578;GO:0070727;GO:0007018;GO:0060294;GO:0033365;GO:0008150;GO:0003006GO:0097228;GO:0097229;GO:0097224;GO:0097225;GO:0110165;GO:0005575	K26675	FSIP2	------	------	ENOG4112BP1	S:Function unknown	PF15783.10	FSIP2	Fibrous sheath-interacting protein 2	nuclear
ENSP00000327704.3	PSMF1	Proteasome inhibitor PI31 subunit	9491	pep chromosome:GRCh38:20:1113263:1167782:1 gene:ENSG00000125818.18 transcript:ENST00000333082.7 gene_biotype:protein_coding transcript_biotype:protein_coding gene_symbol:PSMF1 description:proteasome inhibitor subunit 1 [Source:HGNC Symbol;Acc:HGNC:9571]	2.6891	1.4271	0.03214	up	yes	207.812	77.2784	133.61	84.719654460502	81.688862801968	70.2626	39.802	53.5868	360.009	369.556	111.002	135.838	96.8204	173.648	BP:regulation of catabolic process;BP:negative regulation of catabolic process;BP:negative regulation of metabolic process;BP:regulation of metabolic process;BP:negative regulation of proteolysis;BP:negative regulation of protein catabolic process;BP:modification-dependent macromolecule catabolic process;BP:regulation of primary metabolic process;BP:negative regulation of protein metabolic proces…	GO:0009894;GO:0009895;GO:0009892;GO:0019222;GO:0045861;GO:0042177;GO:0043632;GO:0080090;GO:0051248;GO:0010605;GO:0043161;GO:0051246;GO:0050789;GO:0065007;GO:1901799;GO:0006508;GO:0044238;GO:0060255;GO:0061136;GO:0009987;GO:0019941;GO:0050794;GO:1903050;GO:0030162;GO:0008150;GO:0030163;GO:0008152;GO:0048519;GO:0009056;GO:0009057;GO:0051603;GO:1903051;GO:0019538;GO:0010498;GO:0042176;GO:0043170;GO:…	K06700	PSMF1	hsa03050	Proteasome	ENOG4111GK4	O:Posttranslational modification, protein turnover, chaperones	PF11566.13;PF08577.16	PI31_Prot_N;PI31_Prot_C	PI31 proteasome regulator N-terminal;PI31 proteasome regulator	ER
ENSP00000341743.5	ENSA	Alpha-endosulfine	2029	pep chromosome:GRCh38:1:150622731:150629576:-1 gene:ENSG00000143420.19 transcript:ENST00000339643.9 gene_biotype:protein_coding transcript_biotype:protein_coding gene_symbol:ENSA description:endosulfine alpha [Source:HGNC Symbol;Acc:HGNC:3360]	2.2642	1.179	0.003521	up	yes	189.624	83.7474	66.8556	126.96487235247	67.8289	109.91042684979	97.9154	33.009	248.66	270.746	158.734	150.656	189.741	119.20380085242	BP:regulation of peptide transport;BP:regulation of cellular localization;BP:G2/M transition of mitotic cell cycle;BP:regulation of transport;BP:cell cycle phase transition;BP:mitotic cell cycle phase transition;BP:cell division;BP:regulation of signaling;BP:regulation of biological process;BP:cell cycle;BP:regulation of protein localization;BP:regulation of protein transport;BP:regulation of pro…	GO:0090087;GO:0060341;GO:0000086;GO:0051049;GO:0044770;GO:0044772;GO:0051301;GO:0023051;GO:0050789;GO:0007049;GO:0032880;GO:0051223;GO:0050708;GO:0051046;GO:0010646;GO:0007584;GO:0065007;GO:0010817;GO:0065008;GO:0070201;GO:0000278;GO:0009987;GO:0050796;GO:0050794;GO:0035308;GO:0008150;GO:1903047;GO:0090276;GO:0042221;GO:0032879;GO:0044839;GO:0002791;GO:0050896;GO:0031667;GO:0046883;GO:0022402;GO:…	K27491	ENSA, ARPP19	------	------	ENOG4112586	S:Function unknown	PF04667.22	Endosulfine	cAMP-regulated phosphoprotein/endosulfine conserved region	cytoplasmic
ENSP00000246792.2	RRAS	Ras-related protein R-Ras	6237	pep chromosome:GRCh38:19:49635292:49640143:-1 gene:ENSG00000126458.4 transcript:ENST00000246792.4 gene_biotype:protein_coding transcript_biotype:protein_coding gene_symbol:RRAS description:RAS related [Source:HGNC Symbol;Acc:HGNC:10447]	2.5465	1.3485	0.005113	up	yes	195.738	76.8649	114.327	101.794	76.898414233771	32.1809	56.8393	79.1505	249.669	275.959	218.769	99.7467	228.039	102.24673549642	BP:regulation of response to stimulus;BP:face morphogenesis;BP:signal transduction;BP:positive regulation of cell adhesion;BP:regulation of signal transduction;BP:cellular developmental process;BP:positive regulation of biological process;BP:negative regulation of biological process;BP:small GTPase mediated signal transduction;BP:regulation of endothelial cell-matrix adhesion via fibronectin;BP:p…	GO:0048583;GO:0060325;GO:0007165;GO:0045785;GO:0009966;GO:0048869;GO:0048518;GO:0048519;GO:0007264;GO:1904904;GO:1904906;GO:0048870;GO:0022603;GO:1901342;GO:0035556;GO:0050789;GO:0009653;GO:0051896;GO:0065007;GO:0016477;GO:0050793;GO:0050794;GO:0008150;GO:0051239;GO:1902531;GO:0002521;GO:2000145;GO:2000147;GO:2000146;GO:0030155;GO:0030154;GO:0023051;GO:0010646;GO:0043408;GO:1904018;GO:0051240;GO:…	K07829	RRAS	hsa05132;hsa04014;hsa04371;hsa05205;hsa04625;hsa04015;hsa04024;hsa04218;hsa04140;hsa04072;hsa04137;hsa04010;hsa04360;hsa04810	Salmonella infection;Ras signaling pathway;Apelin signaling pathway;Proteoglycans in cancer;C-type lectin receptor signaling pathway;Rap1 signaling pathway;cAMP signaling pathway;Cellular senescence;Autophagy - animal;Phospholipase D signaling pathway;Mitophagy - animal;MAPK signaling pathway;Axon guidance;Regulation of actin cytoskeleton	COG1100	U:Intracellular trafficking, secretion, and vesicular transport	PF00071.28;PF08477.19;PF00025.27	Ras;Roc;Arf	Ras family;Ras of Complex, Roc, domain of DAPkinase;ADP-ribosylation factor family	cytoplasmic
ENSP00000358647.2	RHOC	Rho-related GTP-binding protein RhoC	389	pep chromosome:GRCh38:1:112701127:112707056:-1 gene:ENSG00000155366.17 transcript:ENST00000369633.6 gene_biotype:protein_coding transcript_biotype:protein_coding gene_symbol:RHOC description:ras homolog family member C [Source:HGNC Symbol;Acc:HGNC:669]	3.3804	1.7572	0.01324	up	yes	207.523	61.3903	0.1	0.1	0.1	0.1	258.169	109.772	192.158	206.04	254.867	270.24050160557	206.29887683468	115.53241774155	BP:positive regulation of response to stimulus;BP:regulation of response to stimulus;BP:signal transduction;BP:cellular component organization or biogenesis;BP:regulation of actin filament bundle assembly;BP:positive regulation of actin filament bundle assembly;BP:regulation of signal transduction;BP:positive regulation of stress fiber assembly;BP:positive regulation of cytoskeleton organization;…	GO:0048584;GO:0048583;GO:0007165;GO:0071840;GO:0032231;GO:0032233;GO:0009966;GO:0051496;GO:0051495;GO:0051493;GO:0051492;GO:0044093;GO:0048518;GO:0043122;GO:0043123;GO:0000910;GO:0048870;GO:0010638;GO:1902766;GO:0022607;GO:0061640;GO:0035556;GO:0050789;GO:0051345;GO:0016043;GO:0065007;GO:0065009;GO:0016477;GO:0051130;GO:0110020;GO:0050790;GO:0050794;GO:0008150;GO:0032956;GO:1902533;GO:0043254;GO:…	K07857	RHOC	------	------	COG1100	H:Coenzyme transport and metabolism	PF00071.28;PF08477.19;PF00025.27;PF00009.33	Ras;Roc;Arf;GTP_EFTU	Ras family;Ras of Complex, Roc, domain of DAPkinase;ADP-ribosylation factor family;Elongation factor Tu GTP binding domain	nuclear
ENSP00000312673.5	GH1	Somatotropin	2688	pep chromosome:GRCh38:17:63917203:63918839:-1 gene:ENSG00000259384.7 transcript:ENST00000323322.10 gene_biotype:protein_coding transcript_biotype:protein_coding gene_symbol:GH1 description:growth hormone 1 [Source:HGNC Symbol;Acc:HGNC:4261]	0.04519	-4.4679	0.002428	down	yes	11.615	257.048	525.117	221.22617813551	76.4778	219.89800044384	264.891	234.679	0.1	0.1	0.1	0.1	0.1	69.1898	BP:regulation of primary metabolic process;BP:regulation of metabolic process;BP:regulation of transport;BP:positive regulation of response to stimulus;BP:regulation of response to stimulus;BP:signal transduction;BP:cell surface receptor signaling pathway;BP:enzyme linked receptor protein signaling pathway;BP:positive regulation of transmembrane transport;BP:regulation of phosphate metabolic proc…	GO:0080090;GO:0019222;GO:0051049;GO:0048584;GO:0048583;GO:0007165;GO:0007166;GO:0007167;GO:0034764;GO:0019220;GO:0051897;GO:0051896;GO:0034762;GO:0019221;GO:0010604;GO:0009966;GO:0009967;GO:0042531;GO:0048513;GO:0044093;GO:0048518;GO:0097696;GO:0051050;GO:0060255;GO:0045859;GO:0071695;GO:0042325;GO:0042327;GO:0050731;GO:0050730;GO:0060396;GO:0031667;GO:0010536;GO:0009893;GO:0033674;GO:0007169;GO:…	K05438	GH	hsa04935;hsa04151;hsa04080;hsa04060;hsa04630	Growth hormone synthesis, secretion and action;PI3K-Akt signaling pathway;Neuroactive ligand-receptor interaction;Cytokine-cytokine receptor interaction;JAK-STAT signaling pathway	ENOG4111HU8	O:Posttranslational modification, protein turnover, chaperones	PF00103.25	Hormone_1	Somatotropin hormone family	extracellular
ENSP00000225972.7	LRRC59	Leucine-rich repeat-containing protein 59	55379	pep chromosome:GRCh38:17:50381238:50397523:-1 gene:ENSG00000108829.10 transcript:ENST00000225972.8 gene_biotype:protein_coding transcript_biotype:protein_coding gene_symbol:LRRC59 description:leucine rich repeat containing 59 [Source:HGNC Symbol;Acc:HGNC:28817]	6.3436	2.6653	0.004296	up	yes	230.481	36.3331	0.1	217.499	0.1	0.1	0.1	0.1	192.229	171.979	356.244	182.03376444337	137.248	343.153	BP:signal transduction;BP:regulation of biological process;BP:biological regulation;BP:cellular process;BP:regulation of cellular process;BP:biological_processCC:nuclear envelope;CC:endoplasmic reticulum;CC:endoplasmic reticulum membrane;CC:intracellular organelle;CC:non-membrane-bounded organelle;CC:mitochondrial nucleoid;CC:membrane-bounded organelle;CC:organelle;CC:cytoplasm;CC:organelle membr…	GO:0007165;GO:0050789;GO:0065007;GO:0009987;GO:0050794;GO:0008150GO:0005635;GO:0005783;GO:0005789;GO:0043229;GO:0043228;GO:0042645;GO:0043227;GO:0043226;GO:0005737;GO:0031090;GO:0016020;GO:0009295;GO:0110165;GO:0031967;GO:0043231;GO:0043232;GO:0005575GO:0016791;GO:0042578;GO:0003674;GO:0045296;GO:0003676;GO:0016787;GO:0140096;GO:0016788;GO:0003824;GO:0050839;GO:0097159;GO:0004722;GO:0004721;GO:00…	------	------	------	------	ENOG4111GH4	S:Function unknown	PF13855.12;PF23598.1;PF12799.13	LRR_8;LRR_14;LRR_4	Leucine rich repeat;Leucine-rich repeat region;Leucine Rich repeats	nuclear
ENSP00000289081.3	FANCC	Fanconi anemia group C protein	2176	pep chromosome:GRCh38:9:95099054:95317709:-1 gene:ENSG00000158169.14 transcript:ENST00000289081.8 gene_biotype:protein_coding transcript_biotype:protein_coding gene_symbol:FANCC description:FA complementation group C [Source:HGNC Symbol;Acc:HGNC:3584]	0.3086	-1.6962	0.008085	down	yes	61.6871	199.883	214.739	231.125	212.954	194.43027440426	212.061	133.99	0.1	0.1	158.624	0.1	211.099	0.1	BP:primary metabolic process;BP:cellular detoxification;BP:macromolecular complex subunit organization;BP:immune system process;BP:cell development;BP:nucleic acid metabolic process;BP:cellular response to DNA damage stimulus;BP:macromolecular complex assembly;BP:superoxide metabolic process;BP:cellular response to chemical stimulus;BP:detoxification;BP:anatomical structure morphogenesis;BP:cellu…	GO:0044238;GO:1990748;GO:0043933;GO:0002376;GO:0048468;GO:0090304;GO:0006974;GO:0065003;GO:0006801;GO:0070887;GO:0098754;GO:0009653;GO:0071840;GO:0006139;GO:0051716;GO:0048869;GO:0002262;GO:0016043;GO:0062197;GO:0042592;GO:0032502;GO:0009887;GO:0032501;GO:0022607;GO:0048609;GO:0006281;GO:0009987;GO:0072593;GO:0006289;GO:0007281;GO:0022414;GO:0006950;GO:0008150;GO:0008152;GO:0022412;GO:0042221;GO:…	K10890	FANCC	hsa03460	Fanconi anemia pathway	ENOG411225E	O:Posttranslational modification, protein turnover, chaperones	PF02106.20	Fanconi_C	Fanconi anaemia group C protein	cytoplasmic
ENSP00000318912.3	CA13	Carbonic anhydrase 13	377677	pep chromosome:GRCh38:8:85245458:85284073:1 gene:ENSG00000185015.8 transcript:ENST00000321764.4 gene_biotype:protein_coding transcript_biotype:protein_coding gene_symbol:CA13 description:carbonic anhydrase 13 [Source:HGNC Symbol;Acc:HGNC:14914]	2.0298	1.0213	0.01194	up	yes	171.733	84.6068	123.871	55.6907	109.60238949498	76.0705	101.35917973353	41.0472	116.039	129.536	287.042	186.573	161.491	149.71442381803	BP:one-carbon metabolic process;BP:small molecule metabolic process;BP:cellular process;BP:biological_process;BP:metabolic processCC:intracellular organelle;CC:membrane-bounded organelle;CC:organelle;CC:cytoplasm;CC:myelin sheath;CC:cellular anatomical entity;CC:intracellular membrane-bounded organelle;CC:cellular_component;CC:cytosolMF:molecular_function;MF:cation binding;MF:transition metal ion…	GO:0006730;GO:0044281;GO:0009987;GO:0008150;GO:0008152GO:0043229;GO:0043227;GO:0043226;GO:0005737;GO:0043209;GO:0110165;GO:0043231;GO:0005575;GO:0005829GO:0003674;GO:0043169;GO:0046914;GO:0016829;GO:0008270;GO:0043167;GO:0004089;GO:0036094;GO:0003824;GO:0046872;GO:0016835;GO:0016836;GO:0005488	K01672	CA	hsa01100;hsa00910	Metabolic pathways;Nitrogen metabolism	COG3338	J:Translation, ribosomal structure and biogenesis	PF00194.26	Carb_anhydrase	Eukaryotic-type carbonic anhydrase	cytoplasmic
ENSP00000400821.1	MTTP	Microsomal triglyceride transfer protein large subunit	4547	pep chromosome:GRCh38:4:99564081:99623240:1 gene:ENSG00000138823.14 transcript:ENST00000457717.6 gene_biotype:protein_coding transcript_biotype:protein_coding gene_symbol:MTTP description:microsomal triglyceride transfer protein [Source:HGNC Symbol;Acc:HGNC:7467]	2.9838	1.5772	0.0218	up	yes	191.722	64.2538	75.763590455817	77.5627	23.3408	64.1397	53.694346107883	91.021439136176	108.062	39.2377	152.16973029296	243.002	347.293	260.57	BP:protein localization;BP:triglyceride transport;BP:acylglycerol transport;BP:cellular component organization or biogenesis;BP:cellular macromolecule localization;BP:rhythmic process;BP:macromolecule localization;BP:macromolecular complex remodeling;BP:protein-lipid complex remodeling;BP:plasma lipoprotein particle remodeling;BP:response to calcium ion;BP:response to metal ion;BP:protein localiz…	GO:0008104;GO:0034197;GO:0034196;GO:0071840;GO:0070727;GO:0048511;GO:0033036;GO:0034367;GO:0034368;GO:0034369;GO:0051592;GO:0010038;GO:0071692;GO:0046486;GO:0019538;GO:0048878;GO:0034377;GO:0034374;GO:0015914;GO:0034379;GO:0034378;GO:0044872;GO:0016043;GO:0065003;GO:0065005;GO:0007623;GO:0006629;GO:0140352;GO:0009306;GO:0006810;GO:0008150;GO:0008152;GO:0042953;GO:0042632;GO:0051234;GO:0044238;GO:…	K14463	MTTP, MTP	hsa04975	Fat digestion and absorption	ENOG410YKCW	U:Intracellular trafficking, secretion, and vesicular transport	PF19444.4;PF01347.28	MTP_lip_bd;Vitellogenin_N	MTP large subunit, lipid-binding domain;Lipoprotein amino terminal region	ER
ENSP00000398131.2	GSPT1	Eukaryotic peptide chain release factor GTP-binding subunit ERF3A	2935	pep chromosome:GRCh38:16:11868128:11915956:-1 gene:ENSG00000103342.13 transcript:ENST00000434724.7 gene_biotype:protein_coding transcript_biotype:protein_coding gene_symbol:GSPT1 description:G1 to S phase transition 1 [Source:HGNC Symbol;Acc:HGNC:4621]	2.1578	1.1096	0.04667	up	yes	173.918	80.5991	118.47	71.5429	56.3933	97.7363	91.5531	47.8995	198.485	316.939	249.042	115.578	87.5744	75.892	BP:regulation of primary metabolic process;BP:regulation of metabolic process;BP:regulation of cellular component organization;BP:regulation of protein complex disassembly;BP:regulation of biological process;BP:posttranscriptional regulation of gene expression;BP:regulation of protein metabolic process;BP:biological regulation;BP:regulation of gene expression;BP:regulation of translational termin…	GO:0080090;GO:0019222;GO:0051128;GO:0043244;GO:0050789;GO:0010608;GO:0051246;GO:0065007;GO:0010468;GO:0006449;GO:0060255;GO:0009889;GO:0050794;GO:0008150;GO:0010556;GO:0006417GO:0022626;GO:0043229;GO:0043228;GO:0043226;GO:0018444;GO:0110165;GO:0032991;GO:0005840;GO:0043232;GO:0005575GO:0035639;GO:1901363;GO:0003674;GO:0005488;GO:0003676;GO:0000166;GO:1901265;GO:0043168;GO:0019001;GO:0032561;GO:00…	K03267	ERF3, GSPT	hsa03015	mRNA surveillance pathway	COG5256	S:Function unknown	PF00009.33;PF22594.2;PF03143.23;PF03144.31;PF07145.20	GTP_EFTU;GTP-eEF1A_C;GTP_EFTU_D3;GTP_EFTU_D2;PAM2	Elongation factor Tu GTP binding domain;GTP-eEF1A C-terminal domain-like;Elongation factor Tu C-terminal domain;Elongation factor Tu domain 2;Ataxin-2 C-terminal region	cytoplasmic
ENSP00000432472.1	BRK1	Protein BRICK1	55845	pep chromosome:GRCh38:3:10115675:10127190:1 gene:ENSG00000254999.4 transcript:ENST00000530758.2 gene_biotype:protein_coding transcript_biotype:protein_coding gene_symbol:BRK1 description:BRICK1 subunit of SCAR/WAVE actin nucleating complex [Source:HGNC Symbol;Acc:HGNC:23057]	2.2159	1.1479	0.01612	up	yes	173.227	78.1755	72.8943	60.6779	76.847701959222	34.3351	93.2179	131.08	139.665	210.159	256.561	74.8234	242.304	115.853	BP:regulation of actin polymerization or depolymerization;BP:regulation of cell projection assembly;BP:signal transduction;BP:regulation of cell projection organization;BP:cellular component organization or biogenesis;BP:positive regulation of cell projection organization;BP:positive regulation of cytoskeleton organization;BP:regulation of cytoskeleton organization;BP:positive regulation of biolo…	GO:0008064;GO:0060491;GO:0007165;GO:0031344;GO:0071840;GO:0031346;GO:0051495;GO:0051493;GO:0048518;GO:0042127;GO:0048870;GO:0010638;GO:0032535;GO:0120034;GO:0120035;GO:0050789;GO:0016601;GO:0016043;GO:0090066;GO:0065007;GO:0065008;GO:0051130;GO:0050794;GO:0008150;GO:0032956;GO:0043254;GO:0110053;GO:0051127;GO:0051125;GO:0033043;GO:0048146;GO:0048145;GO:0048144;GO:0051128;GO:0009790;GO:0009792;GO:…	K05752	C3ORF10, HSPC300	hsa05132;hsa05130;hsa04810	Salmonella infection;Pathogenic Escherichia coli infection;Regulation of actin cytoskeleton	ENOG4111UHX	S:Function unknown	------	------	------	cytoplasmic
ENSP00000329165.6	KRT36	Keratin, type I cuticular Ha6	8689	pep chromosome:GRCh38:17:41486136:41489910:-1 gene:ENSG00000126337.14 transcript:ENST00000328119.11 gene_biotype:protein_coding transcript_biotype:protein_coding gene_symbol:KRT36 description:keratin 36 [Source:HGNC Symbol;Acc:HGNC:6454]	2485.37	11.2792	0.01811	up	yes	248.537	0.1	0.1	0.1	0.1	0.1	0.1	0.1	20.867	229.08542870033	232.15185465483	294.16926539984	635.202	79.7439	BP:regulation of epidermis development;BP:cellular component organization or biogenesis;BP:cellular developmental process;BP:fibril organization;BP:cellular component organization;BP:regulation of biological process;BP:regulation of epithelial cell differentiation;BP:epithelial cell differentiation;BP:biological regulation;BP:developmental process;BP:cell differentiation;BP:regulation of developm…	GO:0045682;GO:0071840;GO:0048869;GO:0097435;GO:0016043;GO:0050789;GO:0030856;GO:0030855;GO:0065007;GO:0032502;GO:0030154;GO:0050793;GO:0009987;GO:0050794;GO:0045595;GO:0008150;GO:0051239;GO:0007010;GO:0006996;GO:0045604;GO:0045104;GO:0045103;GO:2000026;GO:0045109;GO:0045616GO:0099512;GO:0099513;GO:0045095;GO:0043229;GO:0043228;GO:0043227;GO:0043226;GO:0005856;GO:0005575;GO:0045111;GO:0070062;GO:0…	K07604	KRT1	hsa05150;hsa04915	Staphylococcus aureus infection;Estrogen signaling pathway	ENOG410Y9IV	O:Posttranslational modification, protein turnover, chaperones	PF00038.26	Filament	Intermediate filament protein	mitochondrial
ENSP00000380104.2	HBE1	Hemoglobin subunit epsilon	3046	pep chromosome:GRCh38:11:5268345:5269945:-1 gene:ENSG00000213931.7 transcript:ENST00000396895.3 gene_biotype:protein_coding transcript_biotype:protein_coding gene_symbol:HBE1 description:hemoglobin subunit epsilon 1 [Source:HGNC Symbol;Acc:HGNC:4830]	0.1228	-3.0256	0.0001076	down	yes	26.8981	219.017	199.409	259.55449558572	243.62357931802	226.507	252.86032769985	132.148	148.435	0.1	0.1	12.5535	0.1	0.1	BP:hydrogen peroxide catabolic process;BP:cellular process;BP:reactive oxygen species metabolic process;BP:biological_process;BP:metabolic process;BP:catabolic process;BP:hydrogen peroxide metabolic processCC:blood microparticle;CC:hemoglobin complex;CC:cellular anatomical entity;CC:macromolecular complex;CC:cellular_component;CC:haptoglobin-hemoglobin complexMF:oxygen transporter activity;MF:mol…	GO:0042744;GO:0009987;GO:0072593;GO:0008150;GO:0008152;GO:0009056;GO:0042743GO:0072562;GO:0005833;GO:0110165;GO:0032991;GO:0005575;GO:0031838GO:0005344;GO:0003674;GO:0005488;GO:0043167;GO:0016491;GO:0043169;GO:0016684;GO:0046872;GO:0016209;GO:0020037;GO:0031721;GO:0031720;GO:0036094;GO:0003824;GO:0019825;GO:0046906;GO:0043177;GO:0097159;GO:0030492;GO:0005515;GO:0140104;GO:0004601	K13825	HBE	------	------	COG1018	C:Energy production and conversion	PF00042.28	Globin	Globin	cytoplasmic
ENSP00000335084.5	PPP1CC	Serine/threonine-protein phosphatase PP1-gamma catalytic subunit	5501	pep chromosome:GRCh38:12:110719680:110742891:-1 gene:ENSG00000186298.12 transcript:ENST00000335007.10 gene_biotype:protein_coding transcript_biotype:protein_coding gene_symbol:PPP1CC description:protein phosphatase 1 catalytic subunit gamma [Source:HGNC Symbol;Acc:HGNC:9283]	2.0268	1.0192	0.02807	up	yes	164.249	81.0368	106.745	82.9568	46.7909	81.7495	71.3066	96.6721	134.356	267.70385944167	186.822	57.3987	223.396	115.81807313536	BP:circadian regulation of gene expression;BP:regulation of metabolic process;BP:protein dephosphorylation;BP:regulation of intracellular transport;BP:photoperiodism;BP:membrane organization;BP:cellular component organization or biogenesis;BP:cellular developmental process;BP:blastocyst development;BP:rhythmic process;BP:positive regulation of cell development;BP:mitotic nuclear envelope reassemb…	GO:0032922;GO:0019222;GO:0006470;GO:0032386;GO:0009648;GO:0061024;GO:0071840;GO:0048869;GO:0001824;GO:0048511;GO:0010720;GO:0007084;GO:0048518;GO:0006112;GO:0042127;GO:0060255;GO:0060251;GO:0060252;GO:0031468;GO:0042752;GO:0007283;GO:0019538;GO:0022607;GO:0050789;GO:0014015;GO:0014013;GO:0016043;GO:0065007;GO:0007623;GO:0050767;GO:0050793;GO:0009889;GO:0050794;GO:0043412;GO:0036211;GO:0008150;GO:…	K06269	PPP1C	hsa04611;hsa04022;hsa04024;hsa04720;hsa04510;hsa04728;hsa05415;hsa04921;hsa04218;hsa05168;hsa04270;hsa05205;hsa04114;hsa04910;hsa03015;hsa04390;hsa04931;hsa04810;hsa05031;hsa05034;hsa04750;hsa04261	Platelet activation;cGMP-PKG signaling pathway;cAMP signaling pathway;Long-term potentiation;Focal adhesion;Dopaminergic synapse;Diabetic cardiomyopathy;Oxytocin signaling pathway;Cellular senescence;Herpes simplex virus 1 infection;Vascular smooth muscle contraction;Proteoglycans in cancer;Oocyte meiosis;Insulin signaling pathway;mRNA surveillance pathway;Hippo signaling pathway;Insulin resistan…	ENOG410XPVF;COG0639	S:Function unknown;	PF00149.33;PF16891.10	Metallophos;STPPase_N	Calcineurin-like phosphoesterase;Serine-threonine protein phosphatase N-terminal domain	cytoplasmic
ENSP00000299259.6	COPS2	COP9 signalosome complex subunit 2	9318	pep chromosome:GRCh38:15:49127350:49155661:-1 gene:ENSG00000166200.15 transcript:ENST00000299259.10 gene_biotype:protein_coding transcript_biotype:protein_coding gene_symbol:COPS2 description:COP9 signalosome subunit 2 [Source:HGNC Symbol;Acc:HGNC:30747]	2.1208	1.0846	0.0422	up	yes	166.163	78.3507	123.189	59.1057	63.707495596197	120.696	34.4093	68.9966	269.907	194.063	125.553	61.3214	95.6002	250.532	BP:cell differentiation;BP:protein modification by small protein removal;BP:cellular developmental process;BP:protein modification by small protein conjugation or removal;BP:skeletal muscle cell differentiation;BP:developmental process;BP:cell proliferation;BP:protein deneddylation;BP:post-translational protein modification;BP:cellular process;BP:macromolecule modification;BP:protein modification…	GO:0030154;GO:0070646;GO:0048869;GO:0070647;GO:0035914;GO:0032502;GO:0008283;GO:0000338;GO:0043687;GO:0009987;GO:0043412;GO:0036211;GO:0008150;GO:0008152;GO:0044238;GO:0019538;GO:0001833;GO:0001834;GO:0043170GO:0008180;GO:0005737;GO:0110165;GO:0032991;GO:0005575GO:0003674;GO:0003714;GO:0003712;GO:0140110;GO:0060090;GO:0030674	K12176	COPS2, CSN2, TRIP15	------	------	------	------	PF01399.33	PCI	PCI domain	cytoplasmic
ENSP00000276390.2	ATP6V1B2	V-type proton ATPase subunit B, brain isoform	526	pep chromosome:GRCh38:8:20197381:20221696:1 gene:ENSG00000147416.12 transcript:ENST00000276390.7 gene_biotype:protein_coding transcript_biotype:protein_coding gene_symbol:ATP6V1B2 description:ATPase H+ transporting V1 subunit B2 [Source:HGNC Symbol;Acc:HGNC:854]	2.2182	1.1494	0.009542	up	yes	160.862	72.5193	142.59	38.7085	48.1752	91.7375	84.3606	29.5441	154.061	165.792	245.875	106.626	186.717	106.099	BP:regulation of metabolic process;BP:small molecule metabolic process;BP:ribonucleoside triphosphate metabolic process;BP:cellular homeostasis;BP:purine ribonucleoside triphosphate metabolic process;BP:ATP metabolic process;BP:purine nucleotide metabolic process;BP:synaptic vesicle lumen acidification;BP:organophosphate metabolic process;BP:carbohydrate derivative metabolic process;BP:regulation…	GO:0019222;GO:0044281;GO:0009199;GO:0019725;GO:0009205;GO:0046034;GO:0006163;GO:0097401;GO:0019637;GO:1901135;GO:0009894;GO:0009141;GO:0009144;GO:0048878;GO:0050789;GO:0006885;GO:0065007;GO:0098662;GO:0098660;GO:0065008;GO:0006812;GO:0006811;GO:0006810;GO:0050794;GO:0008150;GO:0008152;GO:0051234;GO:0070050;GO:0006753;GO:1902600;GO:0050801;GO:0051649;GO:0051453;GO:0051452;GO:0009259;GO:0006139;GO:…	K02147	ATPeV1B, ATP6B	hsa05120;hsa04966;hsa00190;hsa05323;hsa01100;hsa04721;hsa04145;hsa05110;hsa05165;hsa04150	Epithelial cell signaling in Helicobacter pylori infection;Collecting duct acid secretion;Oxidative phosphorylation;Rheumatoid arthritis;Metabolic pathways;Synaptic vesicle cycle;Phagosome;Vibrio cholerae infection;Human papillomavirus infection;mTOR signaling pathway	COG1156	C:Energy production and conversion	PF00006.31;PF22919.1;PF02874.29	ATP-synt_ab;ATP-synt_VA_C;ATP-synt_ab_N	ATP synthase alpha/beta family, nucleotide-binding domain;C-terminal domain of V and A type ATP synthase;ATP synthase alpha/beta family, beta-barrel domain	mitochondrial
ENSP00000436773.2	BLTP2	Bridge-like lipid transfer protein family member 2	9703	pep chromosome:GRCh38:17:28614446:28645158:-1 gene:ENSG00000007202.16 transcript:ENST00000528896.7 gene_biotype:protein_coding transcript_biotype:protein_coding gene_symbol:BLTP2 description:bridge-like lipid transfer protein family member 2 [Source:HGNC Symbol;Acc:HGNC:28960]	3.388	1.7604	0.01276	up	yes	174.416	51.48	81.072	0.1	0.1	227.408	0.1	0.1	137.45596974575	137.04869040179	176.672	239.204	186.25	169.866	CC:membrane;CC:organelle membrane;CC:mitochondrial membrane;CC:cellular_component;CC:plasma membrane;CC:organelle membrane contact site;CC:endoplasmic reticulum membrane;CC:cellular anatomical entity;CC:endoplasmic reticulum-plasma membrane contact siteMF:phosphatidylinositol binding;MF:phospholipid binding;MF:lipid binding;MF:molecular_function;MF:binding	GO:0016020;GO:0031090;GO:0031966;GO:0005575;GO:0005886;GO:0044232;GO:0005789;GO:0110165;GO:0140268GO:0035091;GO:0005543;GO:0008289;GO:0003674;GO:0005488	------	------	------	------	ENOG410XSYR	S:Function unknown	PF10344.16	Hobbit	Hobbit/FMP27/BTLP2 family	ER
ENSP00000318066.3	ENPP4	Bis(5'-adenosyl)-triphosphatase ENPP4	22875	pep chromosome:GRCh38:6:46129989:46146688:1 gene:ENSG00000001561.7 transcript:ENST00000321037.5 gene_biotype:protein_coding transcript_biotype:protein_coding gene_symbol:ENPP4 description:ectonucleotide pyrophosphatase/phosphodiesterase 4 [Source:HGNC Symbol;Acc:HGNC:3359]	2.2696	1.1824	5.716E-7	up	yes	154.879	68.2399	63.537526379432	60.432650131586	48.894098767817	62.037966802112	80.739772558525	93.7973	169.36891655802	146.43909337656	158.517	162.15570050889	148.44912331636	144.343	BP:purine nucleoside metabolic process;BP:hemostasis;BP:metabolic process;BP:regulation of biological process;BP:ribonucleoside catabolic process;BP:blood coagulation;BP:regulation of response to stimulus;BP:positive regulation of coagulation;BP:nucleoside catabolic process;BP:small molecule catabolic process;BP:positive regulation of wound healing;BP:positive regulation of response to wounding;B…	GO:0042278;GO:0007599;GO:0008152;GO:0050789;GO:0042454;GO:0007596;GO:0048583;GO:0050820;GO:0009164;GO:0044282;GO:0090303;GO:1903036;GO:0072521;GO:0072523;GO:0048584;GO:0046128;GO:1901657;GO:0046130;GO:0051240;GO:0032101;GO:1900046;GO:0065007;GO:0006152;GO:0065008;GO:1900048;GO:0009119;GO:0032501;GO:0050878;GO:0006139;GO:0009987;GO:0050817;GO:0008150;GO:0009116;GO:1903034;GO:0034655;GO:0034656;GO:…	K18424	ENPP4	hsa01100;hsa00230	Metabolic pathways;Purine metabolism	COG1524	S:Function unknown	PF01663.27;PF00884.28	Phosphodiest;Sulfatase	Type I phosphodiesterase / nucleotide pyrophosphatase;Sulfatase	Golgi apparatus
ENSP00000479986.2	PSMD1	26S proteasome non-ATPase regulatory subunit 1	-	pep chromosome:GRCh38:2:231056849:231172802:1 gene:ENSG00000173692.14 transcript:ENST00000619128.5 gene_biotype:protein_coding transcript_biotype:protein_coding gene_symbol:PSMD1 description:proteasome 26S subunit, non-ATPase 1 [Source:HGNC Symbol;Acc:HGNC:9554]	0.4935	-1.0189	0.03295	down	yes	71.591	145.068	160.874	142.25167282133	90.496212956664	101.50772745324	141.73361925786	233.544	34.1686	138.941	132.997	15.1299	56.7242	51.585779672533	BP:regulation of catabolic process;BP:regulation of primary metabolic process;BP:modification-dependent macromolecule catabolic process;BP:regulation of biological process;BP:regulation of metabolic process;BP:proteasome-mediated ubiquitin-dependent protein catabolic process;BP:regulation of protein metabolic process;BP:biological regulation;BP:proteolysis;BP:primary metabolic process;BP:regulati…	GO:0009894;GO:0080090;GO:0043632;GO:0050789;GO:0019222;GO:0043161;GO:0051246;GO:0065007;GO:0006508;GO:0044238;GO:0060255;GO:0009987;GO:0019941;GO:0050794;GO:0008150;GO:0030163;GO:0008152;GO:0009056;GO:0009057;GO:0051603;GO:0019538;GO:0010498;GO:0042176;GO:0043170;GO:0006511GO:0022624;GO:0031974;GO:0035578;GO:0043228;GO:0060205;GO:0043227;GO:0008540;GO:0005838;GO:0000502;GO:0005634;GO:0016020;GO:0…	K03032	PSMD1, RPN2	hsa03050;hsa05020;hsa05022;hsa05014;hsa05016;hsa05017;hsa05010;hsa05012;hsa05169	Proteasome;Prion disease;Pathways of neurodegeneration - multiple diseases;Amyotrophic lateral sclerosis;Huntington disease;Spinocerebellar ataxia;Alzheimer disease;Parkinson disease;Epstein-Barr virus infection	COG5116	O:Posttranslational modification, protein turnover, chaperones	PF21505.3;PF18004.6;PF01851.28;PF13646.12	RPN2_N;RPN2_C;PC_rep;HEAT_2	26S proteasome subunit RPN2, N-terminal domain;26S proteasome regulatory subunit RPN2 C-terminal domain;Proteasome/cyclosome repeat;HEAT repeats	cytoplasmic
ENSP00000394579.3	IFI35	Interferon-induced 35 kDa protein	3430	pep chromosome:GRCh38:17:43006784:43014456:1 gene:ENSG00000068079.8 transcript:ENST00000415816.7 gene_biotype:protein_coding transcript_biotype:protein_coding gene_symbol:IFI35 description:interferon induced protein 35 [Source:HGNC Symbol;Acc:HGNC:5399]	2.4969	1.3201	0.0392	up	yes	153.339	61.4115	70.7952	85.0139	89.301027014877	16.9235	67.091267653436	39.344	122.445	139.364	333.791	83.3095	134.76728258374	106.35555253606	BP:negative regulation of response to stimulus;BP:positive regulation of response to stimulus;BP:regulation of response to stimulus;BP:positive regulation of defense response;BP:regulation of defense response;BP:positive regulation of inflammatory response;BP:response to external biotic stimulus;BP:regulation of signal transduction;BP:positive regulation of signal transduction;BP:cell activation …	GO:0048585;GO:0048584;GO:0048583;GO:0031349;GO:0031347;GO:0050729;GO:0043207;GO:0009966;GO:0009967;GO:0002263;GO:0050727;GO:0044419;GO:0048518;GO:0065007;GO:0042127;GO:0051707;GO:0009607;GO:0009605;GO:0002274;GO:0002376;GO:0002831;GO:0002833;GO:0045321;GO:0050789;GO:0002281;GO:0002684;GO:0002366;GO:0002682;GO:0050794;GO:0006952;GO:0034145;GO:0001775;GO:0008150;GO:0006955;GO:1902532;GO:1902533;GO:…	------	------	------	------	ENOG4111RNW	S:Function unknown	PF07292.18;PF23085.1;PF23222.1;PF07334.18	NID;RRM_PARP14_3;RRM_PARP14_1;IFP_35_N	Nmi/IFP 35 domain;PARP14, third RRM domain;PAR14-like, first RRM domain;Interferon-induced 35 kDa protein	cytoplasmic
ENSP00000346340.2	COPS8	COP9 signalosome complex subunit 8	10920	pep chromosome:GRCh38:2:237085889:237100474:1 gene:ENSG00000198612.11 transcript:ENST00000354371.7 gene_biotype:protein_coding transcript_biotype:protein_coding gene_symbol:COPS8 description:COP9 signalosome subunit 8 [Source:HGNC Symbol;Acc:HGNC:24335]	10.6187	3.4085	0.0006225	up	yes	193.839	18.2546	109.028	0.1	0.1	0.1	0.1	0.1	218.393	129.507	305.599	120.45240109739	249.339	139.74578462244	BP:regulation of post-translational protein modification;BP:cellular component assembly;BP:regulation of phosphate metabolic process;BP:regulation of primary metabolic process;BP:regulation of metabolic process;BP:positive regulation of kinase activity;BP:macromolecular complex subunit organization;BP:phosphorylation;BP:protein deneddylation;BP:activation of protein kinase activity;BP:protein mod…	GO:1901873;GO:0022607;GO:0019220;GO:0080090;GO:0019222;GO:0033674;GO:0043933;GO:0016310;GO:0000338;GO:0032147;GO:0070646;GO:1903320;GO:0050789;GO:0043085;GO:0009893;GO:0065003;GO:0051347;GO:0045116;GO:0007250;GO:0010562;GO:0043549;GO:0070647;GO:0051247;GO:0016043;GO:0032446;GO:0051246;GO:0065007;GO:0071840;GO:0044093;GO:0031399;GO:0048518;GO:0048519;GO:0065009;GO:0042127;GO:0008285;GO:0006468;GO:…	K12181	COPS8, CSN8	------	------	ENOG410XW9N	S:Function unknown	PF10075.15	CSN8_PSD8_EIF3K	CSN8/PSMD8/EIF3K family	cytoplasmic
ENSP00000365439.3	HNRNPK	Heterogeneous nuclear ribonucleoprotein K	3190	pep chromosome:GRCh38:9:83968083:83980215:-1 gene:ENSG00000165119.23 transcript:ENST00000376263.8 gene_biotype:protein_coding transcript_biotype:protein_coding gene_symbol:HNRNPK description:heterogeneous nuclear ribonucleoprotein K [Source:HGNC Symbol;Acc:HGNC:5044]	2.5359	1.3425	0.02884	up	yes	148.813	58.682	64.7361	56.3734	33.1803	46.0297	71.6508	80.1214	185.359	275.1	183.454	64.154	136.965	47.8435	BP:regulation of intrinsic apoptotic signaling pathway in response to DNA damage by p53 class mediator;BP:regulation of primary metabolic process;BP:regulation of metabolic process;BP:regulation of apoptotic signaling pathway;BP:regulation of mRNA processing;BP:negative regulation of mRNA processing;BP:regulation of response to stimulus;BP:signal transduction;BP:positive regulation of receptor-me…	GO:1902165;GO:0080090;GO:0019222;GO:2001233;GO:0050684;GO:0050686;GO:0048583;GO:0007165;GO:0048260;GO:1905599;GO:0010605;GO:0009966;GO:0044093;GO:0051049;GO:0048518;GO:1901796;GO:1902229;GO:0051050;GO:0060255;GO:2001141;GO:0000398;GO:0009892;GO:0009893;GO:0009890;GO:0009891;GO:0051254;GO:0010629;GO:0042981;GO:0050789;GO:1902680;GO:0006357;GO:0065007;GO:0065009;GO:0051130;GO:0009889;GO:0050794;GO:…	K12886	HNRNPK	hsa05206;hsa03040;hsa05203	MicroRNAs in cancer;Spliceosome;Viral carcinogenesis	ENOG4111GSB	K:Transcription	PF00013.35;PF08067.16;PF07650.23;PF13083.13;PF22675.2	KH_1;ROKNT;KH_2;KH_KhpA-B;KH-I_KHDC4-BBP	KH domain;ROKNT;KH domain;KhpA/KhpB, KH domain;KHDC4/BBP-like, KH-domain type I	nuclear
ENSP00000268835.2	PRPSAP2	Phosphoribosyl pyrophosphate synthase-associated protein 2	5636	pep chromosome:GRCh38:17:18858131:18931287:1 gene:ENSG00000141127.15 transcript:ENST00000268835.7 gene_biotype:protein_coding transcript_biotype:protein_coding gene_symbol:PRPSAP2 description:phosphoribosyl pyrophosphate synthetase associated protein 2 [Source:HGNC Symbol;Acc:HGNC:9467]	2073.45	11.0178	3.188E-7	up	yes	207.345	0.1	0.1	0.1	0.1	0.1	0.1	0.1	199.82501991939	228.96	259.57	158.16187284375	239.388	158.16484849856	BP:metabolic process;BP:nucleobase-containing compound metabolic process;BP:nucleotide biosynthetic process;BP:purine-containing compound metabolic process;BP:purine nucleotide metabolic process;BP:purine-containing compound biosynthetic process;BP:organophosphate metabolic process;BP:5-phosphoribose 1-diphosphate biosynthetic process;BP:nucleoside phosphate biosynthetic process;BP:cellular proce…	GO:0008152;GO:0006139;GO:0009165;GO:0072521;GO:0006163;GO:0072522;GO:0019637;GO:0006015;GO:1901293;GO:0009987;GO:0006793;GO:0009058;GO:0008150;GO:0034654;GO:0090407;GO:0055086;GO:0044238;GO:1901135;GO:0006164;GO:0046390;GO:0046391;GO:0019693;GO:1901137;GO:0006796;GO:0009117;GO:0006753;GO:0044281GO:0005737;GO:0002189;GO:1902494;GO:0061695;GO:1990234;GO:0032991;GO:0005575;GO:0110165GO:0035639;GO:00…	------	------	------	------	COG0462	F:Nucleotide transport and metabolism	PF14572.12;PF13793.12;PF00156.33	Pribosyl_synth;Pribosyltran_N;Pribosyltran	Phosphoribosyl synthetase-associated domain;N-terminal domain of ribose phosphate pyrophosphokinase;Phosphoribosyl transferase domain	cytoplasmic
ENSP00000317399.6	EEF1D	Elongation factor 1-delta	1936	pep chromosome:GRCh38:8:143579697:143597388:-1 gene:ENSG00000104529.19 transcript:ENST00000317198.10 gene_biotype:protein_coding transcript_biotype:protein_coding gene_symbol:EEF1D description:eukaryotic translation elongation factor 1 delta [Source:HGNC Symbol;Acc:HGNC:3211]	2.5934	1.3748	0.003621	up	yes	148.74	57.3533	88.0345	48.8347	90.0231	23.2259	55.523633795342	38.4779	163.173	205.456	186.624	64.9754	165.804	106.40762543655	BP:regulation of primary metabolic process;BP:regulation of metabolic process;BP:cellular response to heat;BP:cellular response to stimulus;BP:positive regulation of macromolecule metabolic process;BP:positive regulation of biological process;BP:regulation of macromolecule metabolic process;BP:regulation of RNA biosynthetic process;BP:cellular response to stress;BP:positive regulation of metaboli…	GO:0080090;GO:0019222;GO:0034605;GO:0051716;GO:0010604;GO:0048518;GO:0060255;GO:2001141;GO:0033554;GO:0009893;GO:0009891;GO:0065007;GO:0071214;GO:0009889;GO:0050794;GO:0006950;GO:0008150;GO:0008152;GO:0009266;GO:0050896;GO:0006355;GO:0010557;GO:0010556;GO:0009314;GO:0071479;GO:0071478;GO:0010212;GO:0002182;GO:0045893;GO:0009408;GO:0104004;GO:0051252;GO:0051254;GO:0043170;GO:1902680;GO:0045944;GO:…	K15410	EEF1D	------	------	COG2092	U:Intracellular trafficking, secretion, and vesicular transport	PF00736.24;PF10587.14	EF1_GNE;EF-1_beta_acid	EF-1 guanine nucleotide exchange domain;Eukaryotic elongation factor 1 beta central acidic region	nuclear
ENSP00000217244.3	CSNK2A1	Casein kinase II subunit alpha	1457	pep chromosome:GRCh38:20:472498:543790:-1 gene:ENSG00000101266.19 transcript:ENST00000217244.9 gene_biotype:protein_coding transcript_biotype:protein_coding gene_symbol:CSNK2A1 description:casein kinase 2 alpha 1 [Source:HGNC Symbol;Acc:HGNC:2457]	2.2939	1.1978	0.04249	up	yes	142.951	62.3177	73.8687	66.564994336772	45.383096948884	44.2932	60.656295310412	83.139819733249	114.21256975119	125.105	310.471	104.80605581758	81.2148	121.89503192734	BP:phosphorylation;BP:regulation of biological process;BP:biological regulation;BP:cellular process;BP:regulation of cellular process;BP:biological_process;BP:metabolic process;BP:regulation of cell cycle;BP:phosphate-containing compound metabolic process;BP:phosphorus metabolic processCC:transferase complex;CC:intracellular organelle;CC:membrane-bounded organelle;CC:protein kinase complex;CC:nuc…	GO:0016310;GO:0050789;GO:0065007;GO:0009987;GO:0050794;GO:0008150;GO:0008152;GO:0051726;GO:0006796;GO:0006793GO:1990234;GO:0043229;GO:0043227;GO:1902911;GO:0005634;GO:0043226;GO:0110165;GO:1902494;GO:0061695;GO:1902554;GO:0005956;GO:0032991;GO:0043231;GO:0005829;GO:0005575GO:0000166;GO:0035639;GO:0019208;GO:1901363;GO:0003674;GO:0005488;GO:0098772;GO:1901265;GO:0043168;GO:0004674;GO:0016740;GO:00…	K03097	CSNK2A	hsa03008;hsa04310;hsa05235;hsa04520;hsa05020;hsa04137;hsa05022;hsa04064;hsa05010;hsa05162	Ribosome biogenesis in eukaryotes;Wnt signaling pathway;PD-L1 expression and PD-1 checkpoint pathway in cancer;Adherens junction;Prion disease;Mitophagy - animal;Pathways of neurodegeneration - multiple diseases;NF-kappa B signaling pathway;Alzheimer disease;Measles	ENOG410XNPP	T:Signal transduction mechanisms	PF00069.31;PF07714.23;PF01636.29	Pkinase;PK_Tyr_Ser-Thr;APH	Protein kinase domain;Protein tyrosine and serine/threonine kinase;Phosphotransferase enzyme family	cytoplasmic
ENSP00000351314.4	PSMB10	Proteasome subunit beta type-10	5699	pep chromosome:GRCh38:16:67934506:67936850:-1 gene:ENSG00000205220.12 transcript:ENST00000358514.9 gene_biotype:protein_coding transcript_biotype:protein_coding gene_symbol:PSMB10 description:proteasome 20S subunit beta 10 [Source:HGNC Symbol;Acc:HGNC:9538]	2020.68	10.9806	0.0002519	up	yes	202.068	0.1	0.1	0.1	0.1	0.1	0.1	0.1	146.568	215.061	375.387	142.94032561691	184.93009253154	147.52046692733	BP:T cell activation;BP:leukocyte activation;BP:lymphocyte proliferation;BP:anatomical structure morphogenesis;BP:modification-dependent macromolecule catabolic process;BP:immune system process;BP:cell morphogenesis;BP:proteasome-mediated ubiquitin-dependent protein catabolic process;BP:T cell proliferation;BP:leukocyte proliferation;BP:lymphocyte activation;BP:proteolysis;BP:developmental proces…	GO:0042110;GO:0045321;GO:0046651;GO:0009653;GO:0043632;GO:0002376;GO:0000902;GO:0043161;GO:0042098;GO:0070661;GO:0046649;GO:0006508;GO:0032502;GO:0032501;GO:0044238;GO:0019941;GO:0009987;GO:0008150;GO:0030163;GO:0008152;GO:0006955;GO:0006959;GO:0009056;GO:0009057;GO:0051603;GO:0008283;GO:0032943;GO:0019538;GO:0010498;GO:0001775;GO:0043170;GO:0006511;GO:0050896GO:0019774;GO:0043229;GO:0005654;GO:0…	K02733	PSMB10, MECL1	hsa03050	Proteasome	COG0638	S:Function unknown	PF00227.31;PF12465.13	Proteasome;Pr_beta_C	Proteasome subunit;Proteasome beta subunits C terminal	cytoplasmic
ENSP00000265986.6	IDE	Insulin-degrading enzyme	3416	pep chromosome:GRCh38:10:92451684:92574093:-1 gene:ENSG00000119912.18 transcript:ENST00000265986.11 gene_biotype:protein_coding transcript_biotype:protein_coding gene_symbol:IDE description:insulin degrading enzyme [Source:HGNC Symbol;Acc:HGNC:5381]	4.7232	2.2398	0.0075	up	yes	158.403	33.5374	0.1	139.234	0.1	0.1	61.5907	0.1	185.559	282.782	148.292	112.142	146.446	75.193711737508	BP:regulation of primary metabolic process;BP:regulation of metabolic process;BP:cell surface receptor signaling pathway;BP:enzyme linked receptor protein signaling pathway;BP:transmembrane receptor protein tyrosine kinase signaling pathway;BP:hormone metabolic process;BP:hormone catabolic process;BP:positive regulation of molecular function;BP:cellular homeostasis;BP:regulation of macromolecule …	GO:0080090;GO:0019222;GO:0007166;GO:0007167;GO:0007169;GO:0042445;GO:0042447;GO:0044093;GO:0019725;GO:0060255;GO:0030163;GO:0019538;GO:0002376;GO:0007165;GO:0009896;GO:0009894;GO:0009893;GO:0048002;GO:0150094;GO:1903715;GO:0032092;GO:0065007;GO:0097242;GO:0065009;GO:0065008;GO:0019882;GO:0019883;GO:0019885;GO:0050794;GO:0008150;GO:0008152;GO:0002483;GO:0010604;GO:0051603;GO:0045732;GO:0043393;GO:…	K01408	IDE, ide	hsa03266;hsa05010	Virion - Herpesvirus;Alzheimer disease	COG1025	E:Amino acid transport and metabolism	PF16187.10;PF05193.26;PF00675.25;PF22456.1	Peptidase_M16_M;Peptidase_M16_C;Peptidase_M16;PqqF-like_C_4	Middle or third domain of peptidase_M16;Peptidase M16 inactive domain;Insulinase;PQQ synthase PqqF-like, C-terminal lobe domain 4	cytoplasmic
ENSP00000318297.5	RUVBL1	RuvB-like 1	8607	pep chromosome:GRCh38:3:128080810:128123812:-1 gene:ENSG00000175792.12 transcript:ENST00000322623.10 gene_biotype:protein_coding transcript_biotype:protein_coding gene_symbol:RUVBL1 description:RuvB like AAA ATPase 1 [Source:HGNC Symbol;Acc:HGNC:10474]	2.682	1.4233	0.01142	up	yes	138.837	51.7665	28.1763	6.2424	108.726	24.1833	81.218886710962	62.0525	92.6293	202.674	108.492	152.545	204.954	71.730459734719	BP:regulation of primary metabolic process;BP:regulation of metabolic process;BP:positive regulation of response to stimulus;BP:regulation of response to stimulus;BP:positive regulation of telomere maintenance in response to DNA damage;BP:regulation of Wnt signaling pathway;BP:cellular component organization or biogenesis;BP:cellular response to stimulus;BP:positive regulation of macromolecule me…	GO:0080090;GO:0019222;GO:0048584;GO:0048583;GO:1904507;GO:0030111;GO:0071840;GO:0051716;GO:0010604;GO:0009966;GO:0009967;GO:0048518;GO:0045995;GO:1902680;GO:0051054;GO:0006282;GO:0051052;GO:0006281;GO:0060255;GO:1904505;GO:2001141;GO:0045911;GO:0010638;GO:0006275;GO:0033554;GO:0060828;GO:0022607;GO:0009893;GO:0009891;GO:0090263;GO:0000018;GO:0030177;GO:0042981;GO:0050789;GO:0060382;GO:0016043;GO:…	K04499	RUVBL1, RVB1, INO80H	hsa03082;hsa04310	ATP-dependent chromatin remodeling;Wnt signaling pathway	COG1224	A:RNA processing and modification	PF06068.19;PF17856.7;PF00004.35;PF05496.18;PF13401.12	TIP49;TIP49_C;AAA;RuvB_N;AAA_22	TIP49 P-loop domain;TIP49 AAA-lid domain;ATPase family associated with various cellular activities;Holliday junction DNA helicase RuvB P-loop domain;AAA domain	cytoplasmic
ENSP00000309092.6	GMPPB	Mannose-1-phosphate guanylyltransferase catalytic subunit beta	29925	pep chromosome:GRCh38:3:49719924:49723951:-1 gene:ENSG00000173540.14 transcript:ENST00000308375.10 gene_biotype:protein_coding transcript_biotype:protein_coding gene_symbol:GMPPB description:GDP-mannose pyrophosphorylase B [Source:HGNC Symbol;Acc:HGNC:22932]	2.449	1.2922	0.009256	up	yes	133.511	54.5176	43.4876	54.9769	89.271006186337	50.2754	14.3264	74.7683	122.31	230.01	158.363	93.3309	116.171	80.8828	BP:GDP-mannose metabolic process;BP:GDP-mannose biosynthetic process;BP:small molecule metabolic process;BP:nucleobase-containing compound metabolic process;BP:protein glycosylation;BP:nucleotide-sugar biosynthetic process;BP:nucleotide-sugar metabolic process;BP:cellular process;BP:glycosylation;BP:biosynthetic process;BP:protein modification process;BP:biological_process;BP:metabolic process;BP…	GO:0019673;GO:0009298;GO:0044281;GO:0006139;GO:0006486;GO:0009226;GO:0009225;GO:0009987;GO:0070085;GO:0009058;GO:0036211;GO:0008150;GO:0008152;GO:0034654;GO:0090407;GO:0055086;GO:0044238;GO:1901137;GO:1901135;GO:0043412;GO:0043170;GO:0019538;GO:0006796;GO:0043413;GO:1901293;GO:0006793;GO:0019637;GO:0006753GO:0005737;GO:0110165;GO:0005575GO:0035639;GO:0032553;GO:0003674;GO:0043167;GO:1901363;GO:19…	K00966	GMPP	hsa01250;hsa00520;hsa01100;hsa00051;hsa01240	Biosynthesis of nucleotide sugars;Amino sugar and nucleotide sugar metabolism;Metabolic pathways;Fructose and mannose metabolism;Biosynthesis of cofactors	COG1208	S:Function unknown	PF25087.1;PF00483.29;PF00132.30;PF12804.13;PF25084.1	GMPPB_C;NTP_transferase;Hexapep;NTP_transf_3;LbH_EIF2B	GMPPB C-terminal domain;Nucleotidyl transferase;Bacterial transferase hexapeptide;MobA-like NTP transferase domain;EIF2B subunit epsilon LbH domain	cytoplasmic
ENSP00000296543.4	NAA15	N-alpha-acetyltransferase 15, NatA auxiliary subunit	80155	pep chromosome:GRCh38:4:139301505:139391384:1 gene:ENSG00000164134.14 transcript:ENST00000296543.10 gene_biotype:protein_coding transcript_biotype:protein_coding gene_symbol:NAA15 description:N-alpha-acetyltransferase 15, NatA auxiliary subunit [Source:HGNC Symbol;Acc:HGNC:30782]	2.1431	1.0997	6.734E-5	up	yes	127.299	59.3992	80.878894724759	57.391822502135	33.7941	74.656211348525	33.4067	76.2676	138.632	120.775	130.556	136.42848404532	102.452	134.95100440892	BP:regulation of RNA metabolic process;BP:positive regulation of macromolecule biosynthetic process;BP:metabolic process;BP:regulation of metabolic process;BP:positive regulation of biosynthetic process;BP:protein acetylation;BP:cell differentiation;BP:N-terminal protein amino acid acetylation;BP:protein stabilization;BP:regulation of biological process;BP:N-terminal protein amino acid modificati…	GO:0051252;GO:0010557;GO:0008152;GO:0019222;GO:0009891;GO:0006473;GO:0030154;GO:0006474;GO:0050821;GO:0050789;GO:0031365;GO:0001525;GO:0080090;GO:0043543;GO:0010604;GO:0048869;GO:0042981;GO:0043067;GO:0019219;GO:0043066;GO:0065007;GO:0048518;GO:0048519;GO:0065008;GO:0043069;GO:0010468;GO:0032502;GO:1902680;GO:0045935;GO:0060255;GO:0009889;GO:0009987;GO:0050794;GO:0043412;GO:0036211;GO:0008150;GO:…	K20792	NAA15_16	------	------	ENOG410XR7D	S:Function unknown	PF12569.14;PF07719.23;PF14559.12;PF12895.13;PF13181.12	NatA_aux_su;TPR_2;TPR_19;ANAPC3;TPR_8	N-terminal acetyltransferase A, auxiliary subunit;Tetratricopeptide repeat;Tetratricopeptide repeat;Anaphase-promoting complex, cyclosome, subunit 3;Tetratricopeptide repeat	cytoplasmic
ENSP00000495067.1	CHMP4A	Charged multivesicular body protein 4A	-	pep scaffold:GRCh38:HG1_PATCH:510602:514467:-1 gene:ENSG00000285302.5 transcript:ENST00000643482.1 gene_biotype:protein_coding transcript_biotype:protein_coding gene_symbol:CHMP4A description:charged multivesicular body protein 4A [Source:HGNC Symbol;Acc:HGNC:20274]	8.2219	3.0395	0.0008894	up	yes	164.778	20.0412	119.747	0.1	0.1	0.1	0.1	0.1	163.82896578788	150.194	277.507	121.31589593365	156.77388043455	119.04428027378	BP:protein localization;BP:vesicle fusion;BP:membrane budding;BP:membrane fusion;BP:membrane organization;BP:plasma membrane organization;BP:establishment of organelle localization;BP:cellular component organization or biogenesis;BP:regulation of mitotic spindle assembly;BP:regulation of spindle assembly;BP:cellular macromolecule localization;BP:regulation of cytoskeleton organization;BP:interspe…	GO:0008104;GO:0006906;GO:0006900;GO:0061025;GO:0061024;GO:0007009;GO:0051656;GO:0071840;GO:1901673;GO:0090169;GO:0070727;GO:0051493;GO:0044419;GO:0007080;GO:1902774;GO:0003008;GO:0097576;GO:0051258;GO:0006605;GO:0045184;GO:0061952;GO:0061919;GO:0072657;GO:0051668;GO:1902410;GO:0051701;GO:0050794;GO:0016197;GO:0016192;GO:0090174;GO:0019538;GO:0016050;GO:0070507;GO:0051469;GO:0006612;GO:0006997;GO:…	K12194	CHMP4A_B, SNF7, VPS32A_B	hsa03272;hsa03250;hsa04144;hsa04217	Virion - Hepatitis viruses;Viral life cycle - HIV-1;Endocytosis;Necroptosis	ENOG410XSVB;ENOG410YE9I	S:Function unknown;U:Intracellular trafficking, secretion, and vesicular transport	PF03357.26	Snf7	Snf7	cytoplasmic
ENSP00000242783.7	PKN1	Serine/threonine-protein kinase N1	5585	pep chromosome:GRCh38:19:14433306:14471859:1 gene:ENSG00000123143.13 transcript:ENST00000242783.11 gene_biotype:protein_coding transcript_biotype:protein_coding gene_symbol:PKN1 description:protein kinase N1 [Source:HGNC Symbol;Acc:HGNC:9405]	15.6632	3.9693	0.0001177	up	yes	164.598	10.5086	62.5516	0.1	0.1	0.1	0.1	0.1	146.72888656969	111.66991852342	197.39272457978	205.199	234.457	92.1398	BP:regulation of phosphate metabolic process;BP:regulation of primary metabolic process;BP:regulation of metabolic process;BP:renal system process;BP:signal transduction;BP:regulation of production of molecular mediator of immune response;BP:cellular component organization or biogenesis;BP:negative regulation of macromolecule metabolic process;BP:lymphocyte homeostasis;BP:animal organ development…	GO:0019220;GO:0080090;GO:0019222;GO:0003014;GO:0007165;GO:0002700;GO:0071840;GO:0010605;GO:0002260;GO:0048513;GO:0002682;GO:0042127;GO:0033143;GO:0060255;GO:0048583;GO:0002822;GO:0070227;GO:0002819;GO:2001141;GO:0003008;GO:0042325;GO:0042326;GO:0048872;GO:0048871;GO:0048870;GO:0019538;GO:0002376;GO:0009892;GO:0022603;GO:0032944;GO:0032945;GO:0035556;GO:0050789;GO:0016043;GO:0065007;GO:0002683;GO:…	K06071	PKN1	hsa05132;hsa04621;hsa05135;hsa04151	Salmonella infection;NOD-like receptor signaling pathway;Yersinia infection;PI3K-Akt signaling pathway	ENOG410XNPH	S:Function unknown	PF00069.31;PF02185.21;PF07714.23;PF00433.29;PF14531.12	Pkinase;HR1;PK_Tyr_Ser-Thr;Pkinase_C;Kinase-like	Protein kinase domain;Hr1 repeat;Protein tyrosine and serine/threonine kinase;Protein kinase C terminal domain;Kinase-like	cytoplasmic
ENSP00000379203.3	ATP6V1C1	V-type proton ATPase subunit C 1	528	pep chromosome:GRCh38:8:103021063:103073051:1 gene:ENSG00000155097.12 transcript:ENST00000395862.7 gene_biotype:protein_coding transcript_biotype:protein_coding gene_symbol:ATP6V1C1 description:ATPase H+ transporting V1 subunit C1 [Source:HGNC Symbol;Acc:HGNC:856]	6.8648	2.7792	0.01533	up	yes	150.368	21.9042	130.925	0.1	0.1	0.1	0.1	0.1	180.27893055879	317.203	43.5489	96.0169	140.50906887402	124.65038134209	BP:hydrogen ion transmembrane transport;BP:establishment of localization in cell;BP:inorganic ion transmembrane transport;BP:homeostatic process;BP:inorganic cation transmembrane transport;BP:cation transport;BP:ion transport;BP:cellular homeostasis;BP:transport;BP:biological_process;BP:establishment of localization;BP:localization;BP:transmembrane transport;BP:ion transmembrane transport;BP:neur…	GO:1902600;GO:0051649;GO:0098660;GO:0042592;GO:0098662;GO:0006812;GO:0006811;GO:0019725;GO:0006810;GO:0008150;GO:0051234;GO:0051179;GO:0055085;GO:0034220;GO:0070050;GO:0097401;GO:0009987;GO:0098655GO:0012506;GO:0005765;GO:1902495;GO:0030665;GO:0005575;GO:0031090;GO:0030662;GO:0016020;GO:0005774;GO:0033180;GO:0110165;GO:0099501;GO:0098588;GO:1990351;GO:0030658;GO:0030659;GO:0005886;GO:0032991;GO:0…	K02148	ATPeV1C, ATP6C	hsa05120;hsa04966;hsa00190;hsa05323;hsa01100;hsa04721;hsa04145;hsa05110;hsa05165;hsa04150	Epithelial cell signaling in Helicobacter pylori infection;Collecting duct acid secretion;Oxidative phosphorylation;Rheumatoid arthritis;Metabolic pathways;Synaptic vesicle cycle;Phagosome;Vibrio cholerae infection;Human papillomavirus infection;mTOR signaling pathway	COG5127	C:Energy production and conversion	PF03223.20	V-ATPase_C	V-ATPase subunit C	cytoplasmic
ENSP00000261461.2	PPP2R5A	Serine/threonine-protein phosphatase 2A 56 kDa regulatory subunit alpha isoform	5525	pep chromosome:GRCh38:1:212285410:212361853:1 gene:ENSG00000066027.12 transcript:ENST00000261461.7 gene_biotype:protein_coding transcript_biotype:protein_coding gene_symbol:PPP2R5A description:protein phosphatase 2 regulatory subunit B'alpha [Source:HGNC Symbol;Acc:HGNC:9309]	0.0005911	-10.7243	0.000686	down	yes	0.1	169.171	188.616	95.363830555713	205.059	75.7306	310.47229799598	139.78330461978	0.1	0.1	0.1	0.1	0.1	0.1	BP:negative regulation of transferase activity;BP:regulation of phosphate metabolic process;BP:regulation of primary metabolic process;BP:regulation of metabolic process;BP:protein dephosphorylation;BP:signal transduction;BP:negative regulation of lipid metabolic process;BP:negative regulation of molecular function;BP:negative regulation of biological process;BP:regulation of phosphorylation;BP:n…	GO:0051348;GO:0019220;GO:0080090;GO:0019222;GO:0006470;GO:0007165;GO:0045833;GO:0044092;GO:0048519;GO:0042325;GO:0042326;GO:0019216;GO:0019538;GO:0033673;GO:0009892;GO:0050789;GO:0043549;GO:0065007;GO:0065009;GO:1903828;GO:0090219;GO:0050790;GO:0051338;GO:0050794;GO:0043412;GO:0036211;GO:0008150;GO:0008152;GO:0043550;GO:0016311;GO:0043086;GO:0032880;GO:0010563;GO:0035307;GO:0009987;GO:1904376;GO:…	K11584	PPP2R5	hsa04071;hsa04110;hsa04114;hsa04660;hsa03015;hsa04728;hsa05165;hsa04152;hsa04261;hsa04151	Sphingolipid signaling pathway;Cell cycle;Oocyte meiosis;T cell receptor signaling pathway;mRNA surveillance pathway;Dopaminergic synapse;Human papillomavirus infection;AMPK signaling pathway;Adrenergic signaling in cardiomyocytes;PI3K-Akt signaling pathway	ENOG410XQJW	T:Signal transduction mechanisms	PF01603.26	B56	Protein phosphatase 2A regulatory B subunit	cytoplasmic
ENSP00000361965.4	ADA	Adenosine deaminase	100	pep chromosome:GRCh38:20:44619522:44651699:-1 gene:ENSG00000196839.14 transcript:ENST00000372874.9 gene_biotype:protein_coding transcript_biotype:protein_coding gene_symbol:ADA description:adenosine deaminase [Source:HGNC Symbol;Acc:HGNC:186]	0.4951	-1.0142	0.01932	down	yes	55.8952	112.903	63.4991	141.146	121.17143639046	158.223	81.8594	111.51819761181	67.739432342206	89.686467150918	38.343	96.8501	4.0145	38.7379	BP:organophosphate catabolic process;BP:regulation of secretion;BP:negative regulation of secretion;BP:regulation of transport;BP:regulation of calcium-mediated signaling;BP:nucleotide catabolic process;BP:purine ribonucleoside monophosphate metabolic process;BP:nucleoside catabolic process;BP:nucleotide biosynthetic process;BP:deoxyribonucleoside monophosphate metabolic process;BP:small molecule…	GO:0046434;GO:0051046;GO:0051048;GO:0051049;GO:0050848;GO:0009166;GO:0009167;GO:0009164;GO:0009165;GO:0009162;GO:0044281;GO:0044282;GO:0009161;GO:0009168;GO:0009169;GO:0002824;GO:0002822;GO:0002821;GO:0045823;GO:0009163;GO:0048565;GO:0048566;GO:0048568;GO:0044283;GO:0050671;GO:0046651;GO:0035556;GO:0050789;GO:0030890;GO:0002686;GO:0002684;GO:0002685;GO:0002682;GO:0002683;GO:0009154;GO:0033077;GO:…	K01488	add, ADA	hsa05340;hsa01100;hsa01232;hsa00230	Primary immunodeficiency;Metabolic pathways;Nucleotide metabolism;Purine metabolism	COG1816	U:Intracellular trafficking, secretion, and vesicular transport	PF00962.28	A_deaminase	Adenosine deaminase	cytoplasmic
ENSP00000307078.4	KIF5B	Kinesin-1 heavy chain	3799	pep chromosome:GRCh38:10:32009015:32056425:-1 gene:ENSG00000170759.11 transcript:ENST00000302418.5 gene_biotype:protein_coding transcript_biotype:protein_coding gene_symbol:KIF5B description:kinesin family member 5B [Source:HGNC Symbol;Acc:HGNC:6324]	0.463	-1.1109	0.001116	down	yes	53.3041	115.125	155.578	92.0611	103.13028364096	147.502	87.1092	105.36913534356	41.7209	46.4544	54.5903	83.465757637333	36.6637	56.929426016287	BP:dense core granule transport;BP:protein localization;BP:regulation of transport;BP:vesicle cytoskeletal trafficking;BP:dense core granule cytoskeletal transport;BP:axo-dendritic transport;BP:establishment of mitochondrion localization;BP:establishment of organelle localization;BP:establishment of vesicle localization;BP:cellular component organization or biogenesis;BP:positive regulation of sy…	GO:1901950;GO:0008104;GO:0051049;GO:0099518;GO:0099519;GO:0008088;GO:0051654;GO:0051656;GO:0051650;GO:0071840;GO:0032230;GO:0043207;GO:0070727;GO:0044419;GO:0001909;GO:0099177;GO:0048518;GO:0097479;GO:0033036;GO:0098937;GO:0099111;GO:0051050;GO:0045184;GO:0010970;GO:0097485;GO:0051707;GO:1902414;GO:0031503;GO:0034643;GO:0009607;GO:0009605;GO:0032228;GO:0002376;GO:0045087;GO:0042391;GO:0032418;GO:…	K10396	KIF5	hsa05132;hsa05223;hsa04144;hsa05022;hsa05014;hsa04728;hsa05016;hsa04814;hsa05010;hsa05012;hsa05020	Salmonella infection;Non-small cell lung cancer;Endocytosis;Pathways of neurodegeneration - multiple diseases;Amyotrophic lateral sclerosis;Dopaminergic synapse;Huntington disease;Motor proteins;Alzheimer disease;Parkinson disease;Prion disease	COG5059	Z:Cytoskeleton	PF00225.29;PF16796.11	Kinesin;Microtub_bd	Kinesin motor domain;Microtubule binding	cytoplasmic
ENSP00000377914.4	CIAPIN1	Anamorsin	57019	pep chromosome:GRCh38:16:57428187:57447385:-1 gene:ENSG00000005194.15 transcript:ENST00000394391.9 gene_biotype:protein_coding transcript_biotype:protein_coding gene_symbol:CIAPIN1 description:cytokine induced apoptosis inhibitor 1 [Source:HGNC Symbol;Acc:HGNC:28050]	2.6115	1.3849	0.02692	up	yes	121.471	46.5132	65.205843517372	56.749788743671	57.748576628432	7.39107	23.9677	68.016	197.468	104.911	212.178	62.7497	67.7355	83.783078698599	BP:cellular component assembly;BP:anatomical structure development;BP:cell development;BP:cell death;BP:cellular component organization or biogenesis;BP:cellular component organization;BP:regulation of apoptotic process;BP:regulation of biological process;BP:regulation of programmed cell death;BP:negative regulation of apoptotic process;BP:biological regulation;BP:negative regulation of biologica…	GO:0022607;GO:0048856;GO:0048468;GO:0008219;GO:0071840;GO:0016043;GO:0042981;GO:0050789;GO:0043067;GO:0043066;GO:0065007;GO:0048519;GO:0043069;GO:0032502;GO:0006915;GO:0009987;GO:0016226;GO:0012501;GO:0031163;GO:0008150;GO:0050794;GO:0048869;GO:0030097;GO:0048523GO:0031970;GO:0031974;GO:0043229;GO:0043228;GO:0043227;GO:0043226;GO:0005737;GO:0005730;GO:0005634;GO:0005739;GO:0005654;GO:0110165;GO:0…	K22746	CIAPIN1, DRE2	------	------	COG5636	S:Function unknown	PF20922.3;PF05093.18	Anamorsin_N;CIAPIN1	Anamorsin, N-terminal;Cytokine-induced anti-apoptosis inhibitor 1, Fe-S biogenesis	cytoplasmic
ENSP00000210444.5	NANS	N-acetylneuraminate-9-phosphate synthase	54187	pep chromosome:GRCh38:9:98056732:98083077:1 gene:ENSG00000095380.11 transcript:ENST00000210444.6 gene_biotype:protein_coding transcript_biotype:protein_coding gene_symbol:NANS description:N-acetylneuraminate synthase [Source:HGNC Symbol;Acc:HGNC:19237]	1669.97	10.7056	0.0005977	up	yes	166.997	0.1	0.1	0.1	0.1	0.1	0.1	0.1	310.178	220.41861634771	148.81300623604	105.66895636641	101.106	115.79550863659	BP:small molecule metabolic process;BP:nucleobase-containing compound metabolic process;BP:CMP-N-acetylneuraminate metabolic process;BP:CMP-N-acetylneuraminate biosynthetic process;BP:nucleotide-sugar metabolic process;BP:nucleotide-sugar biosynthetic process;BP:glycosylation;BP:biosynthetic process;BP:biological_process;BP:metabolic process;BP:nucleobase-containing compound biosynthetic process;…	GO:0044281;GO:0006139;GO:0046381;GO:0006055;GO:0009225;GO:0009226;GO:0070085;GO:0009058;GO:0008150;GO:0008152;GO:0034654;GO:0005975;GO:0090407;GO:0055086;GO:0044238;GO:1901137;GO:1901135;GO:0016051;GO:0006796;GO:1901293;GO:0006793;GO:0019637;GO:0009987;GO:0006753GO:0043227;GO:0043226;GO:0005737;GO:0070062;GO:0110165;GO:1903561;GO:0031982;GO:0043230;GO:0005575;GO:0065010;GO:0005829GO:0003674;GO:00…	K05304	NANS, SAS	hsa01100;hsa01250;hsa00520	Metabolic pathways;Biosynthesis of nucleotide sugars;Amino sugar and nucleotide sugar metabolism	COG2089	M:Cell wall/membrane/envelope biogenesis	PF03102.20;PF08666.17	NeuB;SAF	NeuB family;SAF domain	cytoplasmic
ENSP00000389168.2	PPP1R12A	Protein phosphatase 1 regulatory subunit 12A	4659	pep chromosome:GRCh38:12:79773568:79935097:-1 gene:ENSG00000058272.19 transcript:ENST00000450142.7 gene_biotype:protein_coding transcript_biotype:protein_coding gene_symbol:PPP1R12A description:protein phosphatase 1 regulatory subunit 12A [Source:HGNC Symbol;Acc:HGNC:7618]	7.8722	2.9768	0.002454	up	yes	148.037	18.8052	112.331	0.1	0.1	0.1	0.1	0.1	111.685	254.306	83.3661	121.21831224561	196.37773878235	121.27153513582	BP:regulation of primary metabolic process;BP:regulation of metabolic process;BP:protein dephosphorylation;BP:regulation of intracellular transport;BP:signal transduction;BP:cellular component organization or biogenesis;BP:cellular response to stimulus;BP:positive regulation of macromolecule metabolic process;BP:negative regulation of molecular function;BP:positive regulation of biological proces…	GO:0080090;GO:0019222;GO:0006470;GO:0032386;GO:0007165;GO:0071840;GO:0051716;GO:0010604;GO:0044092;GO:0048518;GO:0060255;GO:2001141;GO:0019538;GO:0009893;GO:0009891;GO:0016043;GO:0035507;GO:0065007;GO:0065009;GO:0050790;GO:0009889;GO:0050794;GO:0043412;GO:0036211;GO:0008150;GO:0008152;GO:0050896;GO:0006355;GO:0010557;GO:0010556;GO:0046822;GO:0016311;GO:0030155;GO:0009410;GO:0070887;GO:0043086;GO:…	K06270	PPP1R12A, MYPT1	hsa04611;hsa04022;hsa04024;hsa05205;hsa04510;hsa04810;hsa04921;hsa04270	Platelet activation;cGMP-PKG signaling pathway;cAMP signaling pathway;Proteoglycans in cancer;Focal adhesion;Regulation of actin cytoskeleton;Oxytocin signaling pathway;Vascular smooth muscle contraction	COG0666	J:Translation, ribosomal structure and biogenesis	PF00023.36;PF12796.13;PF15898.10;PF13637.12;PF13857.12;PF13606.12	Ank;Ank_2;PRKG1_interact;Ank_4;Ank_5;Ank_3	Ankyrin repeat;Ankyrin repeats;cGMP-dependent protein kinase interacting domain;Ankyrin repeats;Ankyrin repeats;Ankyrin repeat	cytoplasmic
ENSP00000516890.1	TOLLIP	Toll-interacting protein	54472	pep scaffold:GRCh38:HG152_PATCH:8637:43898:-1 gene:ENSG00000291426.1 transcript:ENST00000707519.1 gene_biotype:protein_coding transcript_biotype:protein_coding gene_symbol:TOLLIP description:toll interacting protein [Source:HGNC Symbol;Acc:HGNC:16476]	10.127	3.3401	0.002704	up	yes	147.585	14.5735	86.941	0.1	0.1	0.1	0.1	0.1	112.581	133.193	294.545	122.089	137.563	85.540782943366	BP:protein localization;BP:regulation of metabolic process;BP:signal transduction;BP:cell surface receptor signaling pathway;BP:cytokine-mediated signaling pathway;BP:positive regulation of macromolecule metabolic process;BP:response to external biotic stimulus;BP:cellular macromolecule localization;BP:cellular developmental process;BP:interspecies interaction between organisms;BP:regulation of p…	GO:0008104;GO:0019222;GO:0007165;GO:0007166;GO:0019221;GO:0010604;GO:0043207;GO:0070727;GO:0048869;GO:0044419;GO:0033233;GO:0033036;GO:0033235;GO:0060255;GO:0061919;GO:0051707;GO:0009607;GO:0009605;GO:0019538;GO:0002376;GO:0030855;GO:1901873;GO:0009893;GO:1901875;GO:0045321;GO:0050789;GO:0065007;GO:0045087;GO:0050794;GO:0006952;GO:0001775;GO:0008150;GO:0008152;GO:0006955;GO:0051603;GO:0050896;GO:…	K05402	TOLLIP	hsa04620	Toll-like receptor signaling pathway	ENOG410XQPY	S:Function unknown	PF00168.36;PF02845.22	C2;CUE	C2 domain;CUE domain	cytoplasmic
ENSP00000371018.5	SIRPB1	Signal-regulatory protein beta-1	10326	pep chromosome:GRCh38:20:1561385:1620009:-1 gene:ENSG00000101307.16 transcript:ENST00000381605.9 gene_biotype:protein_coding transcript_biotype:protein_coding gene_symbol:SIRPB1 description:signal regulatory protein beta 1 [Source:HGNC Symbol;Acc:HGNC:15928]	7.9198	2.9855	0.002364	up	yes	138.553	17.4945	0.1	21.5202	0.1	83.0467	0.1	0.1	126.07255569335	145.38749823534	136.237	77.055142428938	259.941	86.622223046165	BP:cellular response to stimulus;BP:regulation of multicellular organismal process;BP:regulation of cell activation;BP:regulation of transport;BP:positive regulation of cell activation;BP:regulation of T cell activation;BP:regulation of cellular component organization;BP:regulation of cell-cell adhesion;BP:signal transduction;BP:cell surface receptor signaling pathway;BP:regulation of biological …	GO:0051716;GO:0051239;GO:0050865;GO:0051049;GO:0050867;GO:0050863;GO:0051128;GO:0022407;GO:0007165;GO:0007166;GO:0050789;GO:0022409;GO:0050766;GO:0050764;GO:0051249;GO:0045785;GO:0051240;GO:1903039;GO:0002684;GO:0065007;GO:0048518;GO:0002682;GO:1903037;GO:0051130;GO:0051050;GO:0009987;GO:0050870;GO:0060627;GO:0008150;GO:0030155;GO:0032879;GO:0030100;GO:0050794;GO:0051251;GO:0050896;GO:0002694;GO:…	K06551	SIRPA_B1_G, CD172	hsa04148;hsa04380	Efferocytosis;Osteoclast differentiation	ENOG410YKK2	S:Function unknown	PF07654.21;PF13927.12;PF08205.18;PF07686.23;PF13895.12;PF00047.31;PF07679.22	C1-set;Ig_3;C2-set_2;V-set;Ig_2;ig;I-set	Immunoglobulin C1-set domain;Immunoglobulin domain;CD80-like C2-set immunoglobulin domain;Immunoglobulin V-set domain;Immunoglobulin domain;Immunoglobulin domain;Immunoglobulin I-set domain	plasma membrane
ENSP00000353786.7	VPS29	Vacuolar protein sorting-associated protein 29	51699	pep chromosome:GRCh38:12:110491523:110502099:-1 gene:ENSG00000111237.19 transcript:ENST00000360579.11 gene_biotype:protein_coding transcript_biotype:protein_coding gene_symbol:VPS29 description:VPS29 retromer complex component [Source:HGNC Symbol;Acc:HGNC:14340]	5.1351	2.3604	0.02097	up	yes	125.422	24.4244	146.046	0.1	0.1	0.1	0.1	0.1	190.343	149.672	196.772	86.749807433007	18.0606	110.937	BP:protein localization;BP:cellular macromolecule localization;BP:intracellular protein transport;BP:nitrogen compound transport;BP:macromolecule localization;BP:transport;BP:cellular process;BP:establishment of protein localization;BP:biological_process;BP:retrograde transport, endosome to Golgi;BP:establishment of localization in cell;BP:localization within membrane;BP:establishment of localiza…	GO:0008104;GO:0070727;GO:0006886;GO:0071705;GO:0033036;GO:0006810;GO:0009987;GO:0045184;GO:0008150;GO:0042147;GO:0051649;GO:0051668;GO:0051234;GO:0051179;GO:0051641;GO:0016197;GO:0046907;GO:0098876;GO:0032456;GO:0015031;GO:0016482;GO:0016192GO:0012506;GO:0043229;GO:0043227;GO:0043226;GO:0010008;GO:0030904;GO:0031982;GO:0031410;GO:0005770;GO:0110165;GO:0098588;GO:0030659;GO:0097708;GO:0016020;GO:0…	K18467	VPS29	hsa04144	Endocytosis	------	------	PF12850.12;PF00149.33	Metallophos_2;Metallophos	Calcineurin-like phosphoesterase superfamily domain;Calcineurin-like phosphoesterase	cytoplasmic
ENSP00000256496.3	ARL8B	ADP-ribosylation factor-like protein 8B	55207	pep chromosome:GRCh38:3:5122292:5180911:1 gene:ENSG00000134108.14 transcript:ENST00000256496.8 gene_biotype:protein_coding transcript_biotype:protein_coding gene_symbol:ARL8B description:ADP ribosylation factor like GTPase 8B [Source:HGNC Symbol;Acc:HGNC:25564]	14.2408	3.832	0.0003508	up	yes	138.452	9.7222	57.8331	0.1	0.1	0.1	0.1	0.1	152.939	163.554	224.553	66.682642991488	118.78919073544	104.19560879562	BP:protein localization;BP:vesicle fusion;BP:membrane fusion;BP:membrane organization;BP:plasma membrane organization;BP:axo-dendritic transport;BP:autophagosome-lysosome fusion;BP:anterograde axonal transport;BP:response to external biotic stimulus;BP:cellular macromolecule localization;BP:interspecies interaction between organisms;BP:late endosome to lysosome transport;BP:leukocyte mediated cyt…	GO:0008104;GO:0006906;GO:0061025;GO:0061024;GO:0007009;GO:0008088;GO:0061909;GO:0008089;GO:0043207;GO:0070727;GO:0044419;GO:1902774;GO:0001909;GO:0001906;GO:0033036;GO:0016197;GO:0099111;GO:0045184;GO:0010970;GO:0051701;GO:0051707;GO:0002505;GO:0002504;GO:0009607;GO:0016192;GO:0090174;GO:0016050;GO:0002376;GO:0015918;GO:0032418;GO:0006887;GO:0016043;GO:0045055;GO:0071840;GO:0019882;GO:0140352;GO:…	K07955	ARL8	hsa05132	Salmonella infection	ENOG410XNUK	S:Function unknown	PF00025.27;PF00071.28;PF08477.19;PF04670.18;PF00503.26;PF09439.16;PF01926.29	Arf;Ras;Roc;Gtr1_RagA;G-alpha;SRPRB;MMR_HSR1	ADP-ribosylation factor family;Ras family;Ras of Complex, Roc, domain of DAPkinase;Gtr1/RagA G protein conserved region;G-protein alpha subunit;Signal recognition particle receptor beta subunit;50S ribosome-binding GTPase	cytoplasmic
ENSP00000305260.4	GNB2	Guanine nucleotide-binding protein G(I)/G(S)/G(T) subunit beta-2	2783	pep chromosome:GRCh38:7:100673740:100679169:1 gene:ENSG00000172354.10 transcript:ENST00000303210.9 gene_biotype:protein_coding transcript_biotype:protein_coding gene_symbol:GNB2 description:G protein subunit beta 2 [Source:HGNC Symbol;Acc:HGNC:4398]	5.3115	2.4091	0.01943	up	yes	124.383	23.4176	140.006	0.1	0.1	0.1	0.1	0.1	149.47575719801	243.617	88.5568	95.778428309128	45.042	123.82717834627	BP:regulation of transport;BP:cellular process;BP:regulation of potassium ion transport;BP:regulation of biological process;BP:regulation of ion transmembrane transport;BP:regulation of ion transport;BP:regulation of localization;BP:biological_process;BP:biological regulation;BP:regulation of transmembrane transport;BP:regulation of metal ion transport;BP:regulation of potassium ion transmembrane…	GO:0051049;GO:0009987;GO:0043266;GO:0050789;GO:0034765;GO:0043269;GO:0032879;GO:0008150;GO:0065007;GO:0034762;GO:0010959;GO:1901379;GO:0050794;GO:0007186;GO:1904062;GO:0007165GO:0098796;GO:0043227;GO:0043226;GO:0030055;GO:0005737;GO:0098797;GO:0070062;GO:0005765;GO:0005834;GO:0005615;GO:0016020;GO:0005774;GO:0043209;GO:0048471;GO:0110165;GO:0070161;GO:0005925;GO:1902494;GO:0098588;GO:0044297;GO:0…	K04537	GNB2	hsa04713;hsa04727;hsa04371;hsa04728;hsa05200;hsa05170;hsa05032;hsa04723;hsa04014;hsa04725;hsa04724;hsa05034;hsa04726;hsa04926;hsa04151;hsa05167;hsa04062;hsa05163	Circadian entrainment;GABAergic synapse;Apelin signaling pathway;Dopaminergic synapse;Pathways in cancer;Human immunodeficiency virus 1 infection;Morphine addiction;Retrograde endocannabinoid signaling;Ras signaling pathway;Cholinergic synapse;Glutamatergic synapse;Alcoholism;Serotonergic synapse;Relaxin signaling pathway;PI3K-Akt signaling pathway;Kaposi sarcoma-associated herpesvirus infection;…	ENOG410XQUX	S:Function unknown	PF00400.38;PF24814.1;PF24807.1;PF24105.1;PF24817.1;PF25047.1;PF23414.1;PF24805.1;PF23393.2;PF24796.1;PF12894.13;PF23409.1;PF24782.1;PF20426.4;PF24017.1;PF24780.1;PF23798.1;PF23389.1;PF23775.1;PF23609.1;PF23761.1;PF24797.1;PF17005.11	WD40;WD40_Prp19;WD40_CDC20-Fz;Beta-prop_CAF1B_HIR1;WD40_WDHD1_1st;Beta-prop_TEP1_2nd;Beta-prop_EML_2;EIF3I;Beta-prop_WDR90_POC16_2nd;WDR55;ANAPC4_WD40;Beta-prop_EML;WD40_MABP1-WDR62_2nd;NBCH_WD40;Beta-prop_SCAP;WD40_MABP1-WDR62_1st;Beta-prop_SPT8;Beta-prop_WDR19_1st;Beta-prop_RIG_2nd;Beta-prop_EIPR1;Beta-prop_DCAF4;Beta-prop_WDR35_TULP_N;WD40_like	WD domain, G-beta repeat;Prp19 WD40 domain;CDC20/Fizzy WD40 domain;CAF1B/HIR1 beta-propeller domain;WDHD1 first WD40 domain;TEP-1 second beta-propeller;Echinoderm microtubule-associated protein second beta-propeller;EIF3I;WDR90/POC16, second beta-propeller;WDR55;Anaphase-promoting complex subunit 4 WD40 domain;Echinoderm microtubule-associated protein first beta-propeller;MABP1/WDR62 second WD40 …	cytoplasmic
ENSP00000307971.4	RFNG	Beta-1,3-N-acetylglucosaminyltransferase radical fringe	5986	pep chromosome:GRCh38:17:82047902:82051811:-1 gene:ENSG00000169733.12 transcript:ENST00000310496.9 gene_biotype:protein_coding transcript_biotype:protein_coding gene_symbol:RFNG description:RFNG O-fucosylpeptide 3-beta-N-acetylglucosaminyltransferase [Source:HGNC Symbol;Acc:HGNC:9974]	0.3176	-1.6547	0.01652	down	yes	34.6387	109.069	88.734169256231	66.0871	128.684	116.55295979858	108.48656236639	145.868	0.1	0.1	0.1	0.1	74.2717	133.16	BP:cell differentiation;BP:regulation of response to stimulus;BP:positive regulation of signaling;BP:regulation of signaling;BP:positive regulation of cell communication;BP:anatomical structure morphogenesis;BP:regulation of biological process;BP:pattern specification process;BP:regulation of cell communication;BP:regulation of signal transduction;BP:cellular developmental process;BP:positive reg…	GO:0030154;GO:0048583;GO:0023056;GO:0023051;GO:0010647;GO:0009653;GO:0050789;GO:0007389;GO:0010646;GO:0009966;GO:0048869;GO:0048584;GO:0045747;GO:0065007;GO:0048518;GO:0032502;GO:0009887;GO:0032501;GO:0009987;GO:0050794;GO:0008150;GO:0008593;GO:0007399;GO:0048856;GO:0009967;GO:0048731;GO:0048522GO:0031090;GO:0016020;GO:0110165;GO:0098588;GO:0000139;GO:0005575;GO:0005576GO:0003674;GO:0005488;GO:00…	K05948	FNG	hsa05165;hsa04330;hsa00514	Human papillomavirus infection;Notch signaling pathway;Other types of O-glycan biosynthesis	ENOG410XS8Y	O:Posttranslational modification, protein turnover, chaperones	PF02434.22	Fringe	Fringe-like	ER
ENSP00000261263.3	RAB21	Ras-related protein Rab-21	23011	pep chromosome:GRCh38:12:71754863:71800286:1 gene:ENSG00000080371.6 transcript:ENST00000261263.5 gene_biotype:protein_coding transcript_biotype:protein_coding gene_symbol:RAB21 description:RAB21, member RAS oncogene family [Source:HGNC Symbol;Acc:HGNC:18263]	3.5772	1.8388	0.0308	up	yes	111.883	31.2763	133.741	0.1	0.1	0.1	53.5173	0.1	112.861	124.718	188.941	104.55818530416	13.7261	126.49370727997	BP:protein localization;BP:positive regulation of intracellular transport;BP:regulation of secretion;BP:regulation of transport;BP:regulation of intracellular transport;BP:signal transduction;BP:positive regulation of receptor-mediated endocytosis;BP:regulation of extent of cell growth;BP:regulation of cell projection organization;BP:cellular macromolecule localization;BP:positive regulation of c…	GO:0008104;GO:0032388;GO:0051046;GO:0051049;GO:0032386;GO:0007165;GO:0048260;GO:0061387;GO:0031344;GO:0070727;GO:0010720;GO:0048518;GO:0033036;GO:0099111;GO:0051050;GO:0045184;GO:0010970;GO:0010975;GO:0030516;GO:0022604;GO:0022603;GO:0050821;GO:0035556;GO:0050789;GO:0006886;GO:0008088;GO:0008089;GO:0065007;GO:0065008;GO:2000643;GO:2000641;GO:0051130;GO:0050793;GO:0006810;GO:0050794;GO:0008150;GO:…	K07890	RAB21	------	------	ENOG410XQT5	S:Function unknown	PF00071.28;PF08477.19;PF00025.27;PF00009.33	Ras;Roc;Arf;GTP_EFTU	Ras family;Ras of Complex, Roc, domain of DAPkinase;ADP-ribosylation factor family;Elongation factor Tu GTP binding domain	cytoplasmic
ENSP00000222481.4	CPA2	Carboxypeptidase A2	1358	pep chromosome:GRCh38:7:130266863:130289798:1 gene:ENSG00000158516.12 transcript:ENST00000222481.9 gene_biotype:protein_coding transcript_biotype:protein_coding gene_symbol:CPA2 description:carboxypeptidase A2 [Source:HGNC Symbol;Acc:HGNC:2297]	0.2612	-1.9368	0.04792	down	yes	27.9262	106.925	87.8187	79.485565347426	78.855718062175	56.6946	196.05260518282	142.64062774724	0.1	0.1	0.1	167.057	0.1	0.1	BP:proteolysis;BP:cellular process;BP:biological_process;BP:protein catabolic process;BP:metabolic process;BP:catabolic process;BP:macromolecule catabolic process;BP:primary metabolic process;BP:protein metabolic process;BP:protein catabolic process in the vacuole;BP:macromolecule metabolic processCC:intracellular organelle;CC:membrane-bounded organelle;CC:organelle;CC:extracellular space;CC:vacu…	GO:0006508;GO:0009987;GO:0008150;GO:0030163;GO:0008152;GO:0009056;GO:0009057;GO:0044238;GO:0019538;GO:0007039;GO:0043170GO:0043229;GO:0043227;GO:0043226;GO:0005615;GO:0005773;GO:0110165;GO:0043231;GO:0005575;GO:0005576GO:0008238;GO:0003674;GO:0008270;GO:0008233;GO:0008237;GO:0043169;GO:0046914;GO:0008235;GO:0004181;GO:0004180;GO:0043167;GO:0046872;GO:0016787;GO:0140096;GO:0036094;GO:0003824;GO:00…	K01298	CPA2	hsa04972;hsa04974	Pancreatic secretion;Protein digestion and absorption	COG2866	S:Function unknown	PF00246.29;PF02244.21	Peptidase_M14;Propep_M14	Zinc carboxypeptidase;Carboxypeptidase activation peptide	extracellular
ENSP00000273258.3	ARL6IP5	PRA1 family protein 3	10550	pep chromosome:GRCh38:3:69084937:69106092:1 gene:ENSG00000144746.7 transcript:ENST00000273258.4 gene_biotype:protein_coding transcript_biotype:protein_coding gene_symbol:ARL6IP5 description:ADP ribosylation factor like GTPase 6 interacting protein 5 [Source:HGNC Symbol;Acc:HGNC:16937]	1344.84	10.3932	0.0009081	up	yes	134.484	0.1	0.1	0.1	0.1	0.1	0.1	0.1	145.65004236819	248.92006698924	35.6941	104.68882327663	160.30949785494	111.64217112677	BP:protein localization;BP:regulation of transport;BP:positive regulation of response to stimulus;BP:regulation of response to stimulus;BP:behavior;BP:signal transduction;BP:regulation of transmembrane transport;BP:negative regulation of transmembrane transport;BP:nitrogen compound transport;BP:cellular response to stimulus;BP:cellular macromolecule localization;BP:regulation of signal transducti…	GO:0008104;GO:0051049;GO:0048584;GO:0048583;GO:0007610;GO:0007165;GO:0034762;GO:0034763;GO:0071705;GO:0051716;GO:0070727;GO:0009966;GO:0009967;GO:0006979;GO:0045837;GO:0048518;GO:0048519;GO:0033036;GO:0051956;GO:0051955;GO:0051051;GO:0015849;GO:1903789;GO:0015711;GO:0045184;GO:0006835;GO:0072657;GO:0051668;GO:0072659;GO:0003008;GO:0006575;GO:0033554;GO:0042391;GO:0080134;GO:0035556;GO:0042981;GO:…	K20393	ARL6IP5, PRAF3	------	------	ENOG4111MUC	U:Intracellular trafficking, secretion, and vesicular transport	PF03208.24	PRA1	PRA1 family protein	Golgi apparatus
ENSP00000278927.5	ESAM	Endothelial cell-selective adhesion molecule	90952	pep chromosome:GRCh38:11:124753126:124762290:-1 gene:ENSG00000149564.12 transcript:ENST00000278927.10 gene_biotype:protein_coding transcript_biotype:protein_coding gene_symbol:ESAM description:endothelial cell adhesion molecule [Source:HGNC Symbol;Acc:HGNC:17474]	1341.89	10.39	0.01808	up	yes	134.189	0.1	0.1	0.1	0.1	0.1	0.1	0.1	68.5586	167.05829786532	146.574	29.561	49.3696	344.011	BP:maintenance of permeability of blood-brain barrier;BP:protein localization;BP:anatomical structure homeostasis;BP:regulation of fibril organization;BP:cell junction organization;BP:regulation of cellular component organization;BP:homeostatic process;BP:cellular component assembly;BP:regulation of anatomical structure size;BP:regulation of biological process;BP:cellular component organization o…	GO:0035633;GO:0008104;GO:0060249;GO:1902903;GO:0034330;GO:0051128;GO:0042592;GO:0022607;GO:0090066;GO:0050789;GO:0071840;GO:0030832;GO:0030833;GO:0070727;GO:0051493;GO:0016043;GO:0034329;GO:0033043;GO:0065007;GO:0032271;GO:0120193;GO:0120192;GO:0032970;GO:0033036;GO:0032501;GO:0032956;GO:0098609;GO:0009987;GO:0050794;GO:0008150;GO:0045216;GO:0007155;GO:0001894;GO:0098742;GO:0051179;GO:0043254;GO:…	K06787	ESAM	hsa04514;hsa04670	Cell adhesion molecules;Leukocyte transendothelial migration	ENOG4111DT8	U:Intracellular trafficking, secretion, and vesicular transport	PF07686.23;PF13927.12;PF07679.22;PF13895.12;PF00047.31	V-set;Ig_3;I-set;Ig_2;ig	Immunoglobulin V-set domain;Immunoglobulin domain;Immunoglobulin I-set domain;Immunoglobulin domain;Immunoglobulin domain	extracellular
ENSP00000283027.5	NUBP1	Cytosolic Fe-S cluster assembly factor NUBP1	4682	pep chromosome:GRCh38:16:10743842:10769351:1 gene:ENSG00000103274.11 transcript:ENST00000283027.10 gene_biotype:protein_coding transcript_biotype:protein_coding gene_symbol:NUBP1 description:NUBP iron-sulfur cluster assembly factor 1, cytosolic [Source:HGNC Symbol;Acc:HGNC:8041]	7.1832	2.8446	0.01414	up	yes	114.008	15.8715	94.729	0.1	0.1	0.1	0.1	0.1	79.444338468311	111.23924888048	256.235	66.585064767946	90.149868788476	80.392667208576	BP:protein localization;BP:inorganic ion homeostasis;BP:cellular component organization or biogenesis;BP:negative regulation of cell cycle;BP:cellular macromolecule localization;BP:regulation of cytoskeleton organization;BP:negative regulation of biological process;BP:macromolecule localization;BP:cellular homeostasis;BP:chemical homeostasis;BP:cellular component assembly;BP:negative regulation o…	GO:0008104;GO:0098771;GO:0071840;GO:0045786;GO:0070727;GO:0051493;GO:0048519;GO:0033036;GO:0019725;GO:0048878;GO:0022607;GO:0010639;GO:0061842;GO:0050789;GO:0016043;GO:0065007;GO:0050794;GO:0031163;GO:0008150;GO:0051494;GO:0033043;GO:0050801;GO:0051129;GO:0051128;GO:0032886;GO:1990778;GO:0010564;GO:0006879;GO:0009987;GO:0006873;GO:0046606;GO:0046605;GO:0030003;GO:0055080;GO:0055082;GO:0072697;GO:…	------	------	------	------	COG0489	D:Cell cycle control, cell division, chromosome partitioning	PF10609.15;PF01656.29;PF13614.12;PF02374.21	ParA;CbiA;AAA_31;ArsA_ATPase	NUBPL iron-transfer P-loop NTPase;CobQ/CobB/MinD/ParA nucleotide binding domain;AAA domain;Anion-transporting ATPase	cytoplasmic
ENSP00000378787.2	SPN	Leukosialin	6693	pep chromosome:GRCh38:16:29662979:29665527:1 gene:ENSG00000197471.12 transcript:ENST00000395389.2 gene_biotype:protein_coding transcript_biotype:protein_coding gene_symbol:SPN description:sialophorin [Source:HGNC Symbol;Acc:HGNC:11249]	1286.42	10.3291	3.267E-5	up	yes	128.642	0.1	0.1	0.1	0.1	0.1	0.1	0.1	146.45419936049	153.87039106583	51.7094	132.061	108.771	178.98374972162	BP:negative regulation of T cell proliferation;BP:regulation of phosphate metabolic process;BP:regulation of defense response to virus;BP:regulation of metabolic process;BP:negative regulation of response to stimulus;BP:negative regulation of acute inflammatory response to antigenic stimulus;BP:regulation of response to stimulus;BP:negative regulation of lymphocyte mediated immunity;BP:regulation…	GO:0042130;GO:0019220;GO:0050688;GO:0019222;GO:0048585;GO:0002865;GO:0048583;GO:0002707;GO:0002706;GO:0007162;GO:0002704;GO:0002703;GO:0007165;GO:0007166;GO:0045165;GO:0031347;GO:0080090;GO:0050728;GO:0043207;GO:0002687;GO:0048869;GO:0001807;GO:0044419;GO:2000403;GO:0048518;GO:0065007;GO:0031295;GO:0031294;GO:0042127;GO:0006935;GO:0060255;GO:0002822;GO:0002823;GO:0042129;GO:0046649;GO:0002673;GO:…	K06477	SPN, CD43	hsa04514	Cell adhesion molecules	ENOG410YXQE	S:Function unknown	------	------	------	plasma membrane
ENSP00000275607.9	SUMF2	Inactive C-alpha-formylglycine-generating enzyme 2	25870	pep chromosome:GRCh38:7:56064224:56080669:1 gene:ENSG00000129103.19 transcript:ENST00000275607.13 gene_biotype:protein_coding transcript_biotype:protein_coding gene_symbol:SUMF2 description:sulfatase modifying factor 2 [Source:HGNC Symbol;Acc:HGNC:20415]	5.6887	2.5081	0.003847	up	yes	109.012	19.1628	0.1	0.1	0.1	0.1	114.477	0.1	149.736	124.019	42.8111	103.93439475613	116.18804671488	117.38443832566	CC:intracellular membrane-bounded organelle;CC:endoplasmic reticulum;CC:organelle lumen;CC:membrane-enclosed lumen;CC:cellular_component;CC:intracellular organelle lumen;CC:intracellular organelle;CC:endoplasmic reticulum lumen;CC:membrane-bounded organelle;CC:organelle;CC:cellular anatomical entityMF:cation binding;MF:ion binding;MF:identical protein binding;MF:small molecule binding;MF:protein …	GO:0043231;GO:0005783;GO:0043233;GO:0031974;GO:0005575;GO:0070013;GO:0043229;GO:0005788;GO:0043227;GO:0043226;GO:0110165GO:0043169;GO:0043167;GO:0042802;GO:0036094;GO:0005515;GO:0003674;GO:0046872;GO:0005488	------	------	------	------	COG1262	S:Function unknown	PF03781.22	FGE-sulfatase	Sulfatase-modifying factor enzyme 1	cytoplasmic
ENSP00000363878.2	-	CUL2	-	pep chromosome:GRCh38:10:35008551:35071339:-1 gene:ENSG00000108094.17 transcript:ENST00000374746.6 gene_biotype:protein_coding transcript_biotype:protein_coding gene_symbol:CUL2 description:cullin 2 [Source:HGNC Symbol;Acc:HGNC:2552]	4.5847	2.1968	0.04189	up	yes	101.876	22.221	132.826	0.1	0.1	0.1	0.1	0.1	55.5275	140.605	208.268	73.067023569313	99.061423097503	34.7254	BP:primary metabolic process;BP:metabolic process;BP:G1/S transition of mitotic cell cycle;BP:intrinsic apoptotic signaling pathway;BP:cell cycle phase transition;BP:intracellular signal transduction;BP:modification-dependent macromolecule catabolic process;BP:macromolecule metabolic process;BP:mitotic cell cycle phase transition;BP:proteasome-mediated ubiquitin-dependent protein catabolic proces…	GO:0044238;GO:0008152;GO:0000082;GO:0097193;GO:0044770;GO:0035556;GO:0043632;GO:0043170;GO:0044772;GO:0043161;GO:0070647;GO:0050789;GO:0032446;GO:0065007;GO:0006508;GO:0007165;GO:0097190;GO:0043687;GO:0009987;GO:0019941;GO:0031146;GO:0050794;GO:0043412;GO:0036211;GO:0008150;GO:1903047;GO:0044843;GO:0009056;GO:0009057;GO:0051603;GO:0019538;GO:0010498;GO:0016567;GO:0006511;GO:0022402;GO:0030163GO:0…	K03870	CUL2	hsa04066;hsa05211;hsa05200;hsa04120	HIF-1 signaling pathway;Renal cell carcinoma;Pathways in cancer;Ubiquitin mediated proteolysis	COG5647	I:Lipid transport and metabolism	PF00888.28;PF10557.15	Cullin;Cullin_Nedd8	Cullin family;Cullin protein neddylation domain	nuclear
ENSP00000215904.6	PDXP	Chronophin	57026	pep chromosome:GRCh38:22:37658723:37666932:1 gene:ENSG00000241360.2 transcript:ENST00000215904.7 gene_biotype:protein_coding transcript_biotype:protein_coding gene_symbol:PDXP description:pyridoxal phosphatase [Source:HGNC Symbol;Acc:HGNC:30259]	4.5591	2.1887	0.004219	up	yes	99.4067	21.804	25.6084	0.1	104.816	0.1	0.1	0.1	99.7857	135.317	113.685	59.065572313959	68.315097966446	120.27172474093	BP:organophosphate catabolic process;BP:protein dephosphorylation;BP:regulation of actin polymerization or depolymerization;BP:small molecule catabolic process;BP:cellular component organization or biogenesis;BP:cellular response to stimulus;BP:positive regulation of cytoskeleton organization;BP:regulation of cytoskeleton organization;BP:positive regulation of biological process;BP:regulation of …	GO:0046434;GO:0006470;GO:0008064;GO:0044282;GO:0071840;GO:0051716;GO:0051495;GO:0051493;GO:0048518;GO:0007088;GO:0006767;GO:1901881;GO:0019538;GO:0010638;GO:0051783;GO:0019637;GO:0032535;GO:0044281;GO:0022607;GO:1901879;GO:0031247;GO:0050789;GO:0007346;GO:0016043;GO:0090066;GO:0065007;GO:0043243;GO:0042822;GO:0042820;GO:0065008;GO:0051130;GO:0050794;GO:0043412;GO:0036211;GO:0008150;GO:0008152;GO:…	K07758	PDXP	hsa00750;hsa01100;hsa01240	Vitamin B6 metabolism;Metabolic pathways;Biosynthesis of cofactors	COG0647	G:Carbohydrate transport and metabolism	PF13344.12;PF13242.12;PF00702.32;PF13419.12	Hydrolase_6;Hydrolase_like;Hydrolase;HAD_2	Haloacid dehalogenase-like hydrolase;HAD-hyrolase-like;haloacid dehalogenase-like hydrolase;Haloacid dehalogenase-like hydrolase	cytoplasmic
ENSP00000338082.4	HBG2	Hemoglobin subunit gamma-2	3048	pep chromosome:GRCh38:11:5253188:5254781:-1 gene:ENSG00000196565.15 transcript:ENST00000336906.6 gene_biotype:protein_coding transcript_biotype:protein_coding gene_symbol:HBG2 description:hemoglobin subunit gamma 2 [Source:HGNC Symbol;Acc:HGNC:4832]	1208.78	10.2393	0.001693	up	yes	120.878	0.1	0.1	0.1	0.1	0.1	0.1	0.1	115.61708913511	118.854	191.34490577872	15.5222	202.194	81.736871067267	BP:one-carbon compound transport;BP:hydrogen peroxide catabolic process;BP:carbon dioxide transport;BP:transport;BP:reactive oxygen species metabolic process;BP:biological_process;BP:metabolic process;BP:establishment of localization;BP:catabolic process;BP:localization;BP:gas transport;BP:oxygen transport;BP:hydrogen peroxide metabolic process;BP:cellular processCC:blood microparticle;CC:hemoglo…	GO:0019755;GO:0042744;GO:0015670;GO:0006810;GO:0072593;GO:0008150;GO:0008152;GO:0051234;GO:0009056;GO:0051179;GO:0015669;GO:0015671;GO:0042743;GO:0009987GO:0072562;GO:0005833;GO:0110165;GO:0032991;GO:0005829;GO:0005575;GO:0031838GO:0005344;GO:0003674;GO:0005488;GO:0043167;GO:0016491;GO:0043169;GO:0016684;GO:0046872;GO:0016209;GO:0020037;GO:0031721;GO:0031720;GO:0036094;GO:0003824;GO:0030492;GO:00…	K13824	HBG	------	------	COG1018	C:Energy production and conversion	PF00042.28	Globin	Globin	cytoplasmic
ENSP00000378719.1	KTN1	Kinectin	3895	pep chromosome:GRCh38:14:55580324:55680718:1 gene:ENSG00000126777.18 transcript:ENST00000395308.5 gene_biotype:protein_coding transcript_biotype:protein_coding gene_symbol:KTN1 description:kinectin 1 [Source:HGNC Symbol;Acc:HGNC:6467]	1141.84	10.1571	1.363E-10	up	yes	114.184	0.1	0.1	0.1	0.1	0.1	0.1	0.1	117.28405167591	115.496	107.547	133.18230937045	105.61263507869	105.98424160516	BP:protein localization;BP:establishment of localization;BP:cellular macromolecule localization;BP:nitrogen compound transport;BP:macromolecule localization;BP:transport;BP:cellular process;BP:establishment of protein localization;BP:biological_process;BP:localization;BP:cellular localization;BP:microtubule-based process;BP:microtubule-based movement;BP:protein transportCC:endoplasmic reticulum;C…	GO:0008104;GO:0051234;GO:0070727;GO:0071705;GO:0033036;GO:0006810;GO:0009987;GO:0045184;GO:0008150;GO:0051179;GO:0051641;GO:0007017;GO:0007018;GO:0015031GO:0005783;GO:0031974;GO:0005789;GO:0043229;GO:0043227;GO:0043226;GO:0031090;GO:0016020;GO:0110165;GO:0005788;GO:0005886;GO:0043231;GO:0043233;GO:0005575;GO:0070013GO:0019894;GO:0003674;GO:0005488;GO:0003676;GO:0050839;GO:0008092;GO:0097159;GO:00…	K17975	KTN1	------	------	ENOG410YAE3	U:Intracellular trafficking, secretion, and vesicular transport	PF05104.17	Rib_recp_KP_reg	Ribosome receptor lysine/proline rich region	ER
ENSP00000258796.7	TTYH3	Protein tweety homolog 3	80727	pep chromosome:GRCh38:7:2631986:2664802:1 gene:ENSG00000136295.16 transcript:ENST00000258796.12 gene_biotype:protein_coding transcript_biotype:protein_coding gene_symbol:TTYH3 description:tweety family member 3 [Source:HGNC Symbol;Acc:HGNC:22222]	10.5631	3.401	6.155E-6	up	yes	104.28	9.8721	21.9155	36.9174	0.1	0.1	0.1	0.1	119.227	131.737	72.0766	97.629743223304	90.5892	114.418	BP:anion transport;BP:chloride transport;BP:ion transport;BP:establishment of localization;BP:localization;BP:cellular process;BP:transport;BP:ion transmembrane transport;BP:biological_process;BP:inorganic anion transport;BP:transmembrane transportCC:plasma membrane;CC:chloride channel complex;CC:membrane-bounded organelle;CC:organelle;CC:cellular_component;CC:extracellular exosome;CC:membrane;CC…	GO:0006820;GO:0006821;GO:0006811;GO:0051234;GO:0051179;GO:0009987;GO:0006810;GO:0034220;GO:0008150;GO:0015698;GO:0055085GO:0005886;GO:0034707;GO:0043227;GO:0043226;GO:0005575;GO:0070062;GO:0016020;GO:0110165;GO:1902495;GO:1990351;GO:0032991;GO:1903561;GO:0031982;GO:0043230;GO:0098796;GO:0034702;GO:0065010GO:0005229;GO:0005225;GO:0003674;GO:0005488;GO:0043167;GO:0015318;GO:0008509;GO:0015276;GO:00…	K22641	TTYH	------	------	ENOG410ZNTN	U:Intracellular trafficking, secretion, and vesicular transport	PF04906.18	Tweety	Tweety	extracellular
ENSP00000325285.5	MTMR4	Phosphatidylinositol-3,5-bisphosphate 3-phosphatase MTMR4	9110	pep chromosome:GRCh38:17:58489537:58517905:-1 gene:ENSG00000108389.10 transcript:ENST00000323456.9 gene_biotype:protein_coding transcript_biotype:protein_coding gene_symbol:MTMR4 description:myotubularin related protein 4 [Source:HGNC Symbol;Acc:HGNC:7452]	4.8673	2.2831	0.01542	up	yes	93.0298	19.1132	0.1	114.179	0.1	0.1	0.1	0.1	90.85	134.94439182304	118.795	26.5029	65.380722664829	121.70558445708	BP:regulation of phosphate metabolic process;BP:regulation of primary metabolic process;BP:regulation of metabolic process;BP:protein dephosphorylation;BP:negative regulation of response to stimulus;BP:regulation of response to stimulus;BP:negative regulation of signal transduction;BP:regulation of signal transduction;BP:phosphatidylinositol biosynthetic process;BP:regulation of macromolecule met…	GO:0019220;GO:0080090;GO:0019222;GO:0006470;GO:0048585;GO:0048583;GO:0009968;GO:0009966;GO:0006661;GO:0060255;GO:0046488;GO:0046486;GO:0030512;GO:0019538;GO:0019637;GO:0009894;GO:0060304;GO:0050789;GO:0090101;GO:0065007;GO:0046856;GO:0006629;GO:0017015;GO:0050794;GO:0043412;GO:0036211;GO:0008150;GO:0008152;GO:1903725;GO:0035303;GO:0090407;GO:0051174;GO:0008654;GO:0016311;GO:0023057;GO:0010648;GO:…	K18082	MTMR3_4, ZFYVE10_11	hsa04140;hsa01100;hsa04070;hsa00562	Autophagy - animal;Metabolic pathways;Phosphatidylinositol signaling system;Inositol phosphate metabolism	ENOG410XPYG	S:Function unknown	PF06602.19;PF01363.27	Myotub-related;FYVE	Myotubularin-like phosphatase domain;FYVE zinc finger	cytoplasmic
ENSP00000320176.3	HCLS1	Hematopoietic lineage cell-specific protein	3059	pep chromosome:GRCh38:3:121631399:121660903:-1 gene:ENSG00000180353.11 transcript:ENST00000314583.8 gene_biotype:protein_coding transcript_biotype:protein_coding gene_symbol:HCLS1 description:hematopoietic cell-specific Lyn substrate 1 [Source:HGNC Symbol;Acc:HGNC:4844]	1102.13	10.1061	0.001456	up	yes	110.213	0.1	0.1	0.1	0.1	0.1	0.1	0.1	107.832	212.847	141.663	85.7284	30.1802	83.025345342485	BP:regulation of intracellular protein transport;BP:nuclear transport;BP:regulation of phosphate metabolic process;BP:regulation of primary metabolic process;BP:regulation of metabolic process;BP:regulation of transport;BP:regulation of intracellular transport;BP:positive regulation of response to stimulus;BP:response to peptide;BP:regulation of actin polymerization or depolymerization;BP:signal …	GO:0033157;GO:0051169;GO:0019220;GO:0080090;GO:0019222;GO:0051049;GO:0032386;GO:0048584;GO:1901652;GO:0008064;GO:0007165;GO:0007166;GO:0051897;GO:0051896;GO:0071840;GO:0019221;GO:0010605;GO:0009966;GO:0009967;GO:0051493;GO:0042531;GO:0030852;GO:0043066;GO:0030854;GO:0045639;GO:0048518;GO:0048519;GO:0042127;GO:0042306;GO:0051050;GO:0060255;GO:0048583;GO:1903708;GO:2001141;GO:1903706;GO:0042325;GO:…	K06106	CTTN, EMS1	hsa04530;hsa05205;hsa05131;hsa05130;hsa05100	Tight junction;Proteoglycans in cancer;Shigellosis;Pathogenic Escherichia coli infection;Bacterial invasion of epithelial cells	ENOG410XTAK	Z:Cytoskeleton	PF02218.20;PF00018.34;PF14604.12;PF07653.23	HS1_rep;SH3_1;SH3_9;SH3_2	Repeat in HS1/Cortactin;SH3 domain;Variant SH3 domain;Variant SH3 domain	nuclear
ENSP00000382697.1	ROCK1	Rho-associated protein kinase 1	6093	pep chromosome:GRCh38:18:20946906:21111813:-1 gene:ENSG00000067900.9 transcript:ENST00000399799.3 gene_biotype:protein_coding transcript_biotype:protein_coding gene_symbol:ROCK1 description:Rho associated coiled-coil containing protein kinase 1 [Source:HGNC Symbol;Acc:HGNC:10251]	10.4642	3.3874	0.001066	up	yes	100.649	9.6184	57.2104	0.1	0.1	0.1	0.1	0.1	125.47	167.879	112.244	65.9717	81.3752	50.9556	BP:protein localization;BP:regulation of phosphate metabolic process;BP:regulation of primary metabolic process;BP:regulation of metabolic process;BP:positive regulation of cell junction assembly;BP:regulation of transport;BP:ameboidal-type cell migration;BP:positive regulation of response to stimulus;BP:regulation of response to stimulus;BP:regulation of tube diameter;BP:Rho protein signal trans…	GO:0008104;GO:0019220;GO:0080090;GO:0019222;GO:1901890;GO:0051049;GO:0001667;GO:0048584;GO:0048583;GO:0035296;GO:0007266;GO:0003013;GO:0043524;GO:0007165;GO:0051893;GO:0090066;GO:0071840;GO:0072659;GO:0010605;GO:0010604;GO:0045785;GO:0009966;GO:0009967;GO:0051493;GO:0070848;GO:0045664;GO:0043066;GO:0030856;GO:1990778;GO:0032060;GO:0048518;GO:0048519;GO:0110061;GO:1905203;GO:1901550;GO:1905205;GO:…	K04514	ROCK1	hsa04350;hsa04071;hsa05131;hsa05130;hsa04611;hsa05135;hsa04022;hsa05206;hsa05200;hsa04024;hsa04530;hsa05205;hsa04520;hsa04510;hsa04270;hsa04360;hsa04670;hsa04810;hsa04062;hsa04921;hsa05163	TGF-beta signaling pathway;Sphingolipid signaling pathway;Shigellosis;Pathogenic Escherichia coli infection;Platelet activation;Yersinia infection;cGMP-PKG signaling pathway;MicroRNAs in cancer;Pathways in cancer;cAMP signaling pathway;Tight junction;Proteoglycans in cancer;Adherens junction;Focal adhesion;Vascular smooth muscle contraction;Axon guidance;Leukocyte transendothelial migration;Regul…	ENOG410XR1Q	T:Signal transduction mechanisms	PF00069.31;PF07714.23;PF08912.16;PF00169.35	Pkinase;PK_Tyr_Ser-Thr;Rho_Binding;PH	Protein kinase domain;Protein tyrosine and serine/threonine kinase;Rho Binding;PH domain	cytoplasmic
ENSP00000320002.6	BDNF	Neurotrophic factor BDNF precursor form	627	pep chromosome:GRCh38:11:27654893:27722058:-1 gene:ENSG00000176697.20 transcript:ENST00000314915.6 gene_biotype:protein_coding transcript_biotype:protein_coding gene_symbol:BDNF description:brain derived neurotrophic factor [Source:HGNC Symbol;Acc:HGNC:1033]	7.3014	2.8682	0.0001775	up	yes	96.9585	13.2795	0.1	0.1	0.1	0.1	0.1	79.1767	92.2352	95.9419	100.151	82.236695222456	87.220160749522	123.96669752079	BP:negative regulation of apoptotic signaling pathway;BP:regulation of phosphate metabolic process;BP:regulation of primary metabolic process;BP:regulation of metabolic process;BP:regulation of apoptotic signaling pathway;BP:positive regulation of cell junction assembly;BP:negative regulation of response to stimulus;BP:positive regulation of response to stimulus;BP:regulation of response to stimu…	GO:2001234;GO:0019220;GO:0080090;GO:0019222;GO:2001233;GO:1901890;GO:0048585;GO:0048584;GO:0048583;GO:0007613;GO:0007611;GO:0043523;GO:0043524;GO:0007165;GO:0007166;GO:0007167;GO:0007169;GO:0061387;GO:0031344;GO:0071840;GO:0031346;GO:0097485;GO:0009968;GO:0009966;GO:0009967;GO:0048672;GO:0045664;GO:0010720;GO:0099177;GO:0048518;GO:0048519;GO:0120039;GO:0038179;GO:1901888;GO:0060255;GO:0050807;GO:…	K04355	BDNF	hsa04014;hsa04010;hsa04024;hsa05030;hsa04722;hsa05034;hsa05022;hsa05016;hsa04151	Ras signaling pathway;MAPK signaling pathway;cAMP signaling pathway;Cocaine addiction;Neurotrophin signaling pathway;Alcoholism;Pathways of neurodegeneration - multiple diseases;Huntington disease;PI3K-Akt signaling pathway	ENOG410XRPH	A:RNA processing and modification	PF00243.23	NGF	Nerve growth factor family	ER
ENSP00000364815.3	VARS1	Valine--tRNA ligase	7407	pep chromosome:GRCh38:6:31777518:31795752:-1 gene:ENSG00000204394.13 transcript:ENST00000375663.8 gene_biotype:protein_coding transcript_biotype:protein_coding gene_symbol:VARS1 description:valyl-tRNA synthetase 1 [Source:HGNC Symbol;Acc:HGNC:12651]	1075.01	10.0701	0.001895	up	yes	107.501	0.1	0.1	0.1	0.1	0.1	0.1	0.1	77.702	230.937	99.9855	73.539885162696	57.6197	105.22116759739	BP:valyl-tRNA aminoacylation;BP:nucleic acid metabolic process;BP:nucleobase-containing compound metabolic process;BP:cellular amino acid metabolic process;BP:cellular process;BP:biological_process;BP:metabolic process;BP:RNA metabolic process;BP:primary metabolic process;BP:macromolecule metabolic process;BP:tRNA metabolic process;BP:amino acid activation;BP:tRNA aminoacylation;BP:tRNA aminoacyl…	GO:0006438;GO:0090304;GO:0006139;GO:0006520;GO:0009987;GO:0008150;GO:0008152;GO:0016070;GO:0044238;GO:0043170;GO:0006399;GO:0043038;GO:0043039;GO:0006418GO:0110165;GO:0005829;GO:0005575GO:0035639;GO:0003674;GO:0005488;GO:0002161;GO:0004832;GO:0043167;GO:1901363;GO:1901265;GO:0043168;GO:0004812;GO:0000166;GO:0017076;GO:0016787;GO:0140098;GO:0052689;GO:0036094;GO:0003824;GO:0016788;GO:0016874;GO:00…	K01873	VARS, valS	hsa00970	Aminoacyl-tRNA biosynthesis	COG0525	J:Translation, ribosomal structure and biogenesis	PF00133.28;PF08264.19;PF00043.30;PF09334.17;PF13603.12	tRNA-synt_1;Anticodon_1;GST_C;tRNA-synt_1g;tRNA-synt_1_2	tRNA synthetases class I;Anticodon-binding domain of tRNA ligase;Glutathione S-transferase, C-terminal domain;tRNA synthetases class I;Leucyl-tRNA synthetase, editing domain	cytoplasmic
ENSP00000251968.3	TSG101	Tumor susceptibility gene 101 protein	7251	pep chromosome:GRCh38:11:18480311:18526942:-1 gene:ENSG00000074319.13 transcript:ENST00000251968.4 gene_biotype:protein_coding transcript_biotype:protein_coding gene_symbol:TSG101 description:tumor susceptibility 101 [Source:HGNC Symbol;Acc:HGNC:15971]	6.1839	2.6285	0.01126	up	yes	91.7021	14.8291	48.1649	0.1	0.1	0.1	40.4099	0.1	121.69370349063	66.5016	178.14	18.1395	57.9148	107.82220908649	BP:protein localization;BP:regulation of phosphate metabolic process;BP:regulation of primary metabolic process;BP:regulation of metabolic process;BP:positive regulation of secretion;BP:regulation of transport;BP:negative regulation of response to stimulus;BP:positive regulation of viral budding via host ESCRT complex;BP:regulation of response to stimulus;BP:regulation of viral budding via host E…	GO:0008104;GO:0019220;GO:0080090;GO:0019222;GO:0051047;GO:0051049;GO:0048585;GO:1903774;GO:0048583;GO:1903772;GO:0061024;GO:0010556;GO:0051656;GO:0030100;GO:0051650;GO:0071840;GO:0051348;GO:0010605;GO:0009968;GO:0070727;GO:0009966;GO:0048869;GO:0006469;GO:1903541;GO:0033043;GO:0045324;GO:0030855;GO:0048518;GO:0048519;GO:0033036;GO:0043328;GO:0042127;GO:0042325;GO:0030154;GO:0030216;GO:0051050;GO:…	K12183	TSG101, STP22, VPS23	hsa03272;hsa03250;hsa04144	Virion - Hepatitis viruses;Viral life cycle - HIV-1;Endocytosis	ENOG410XT2Q	U:Intracellular trafficking, secretion, and vesicular transport	PF05743.18;PF09454.15	UEV;Vps23_core	UEV domain;Vps23 core domain	cytoplasmic
ENSP00000260402.3	PLCB2	1-phosphatidylinositol 4,5-bisphosphate phosphodiesterase beta-2	5330	pep chromosome:GRCh38:15:40287909:40307935:-1 gene:ENSG00000137841.12 transcript:ENST00000260402.8 gene_biotype:protein_coding transcript_biotype:protein_coding gene_symbol:PLCB2 description:phospholipase C beta 2 [Source:HGNC Symbol;Acc:HGNC:9055]	3.7363	1.9016	0.04318	up	yes	83.3552	22.3097	0.1	0.1	133.358	0.1	0.1	0.1	29.9527	84.9714	138.162	93.5967	80.0743	73.374159313035	BP:detection of chemical stimulus;BP:regulation of sequestering of calcium ion;BP:negative regulation of sequestering of calcium ion;BP:signal transduction;BP:detection of chemical stimulus involved in sensory perception of bitter taste;BP:release of sequestered calcium ion into cytosol;BP:negative regulation of biological process;BP:sensory perception of chemical stimulus;BP:sensory perception;B…	GO:0009593;GO:0051282;GO:0051283;GO:0007165;GO:0001580;GO:0051209;GO:0048519;GO:0007606;GO:0007600;GO:0046488;GO:0046486;GO:0007200;GO:0007202;GO:0070588;GO:0019637;GO:0035556;GO:0050789;GO:0016042;GO:0065007;GO:0098662;GO:0006812;GO:0007186;GO:0097553;GO:0006629;GO:0006811;GO:0006810;GO:0006816;GO:0050794;GO:0008150;GO:0008152;GO:0051234;GO:0048015;GO:0051606;GO:0050896;GO:0098660;GO:0003008;GO:…	K05858	PLCB	hsa05131;hsa04611;hsa04613;hsa04022;hsa04020;hsa04928;hsa04720;hsa04723;hsa04725;hsa04724;hsa04929;hsa04726;hsa04927;hsa04728;hsa04925;hsa04924;hsa04062;hsa04922;hsa04921;hsa05417;hsa00562;hsa04961;hsa04713;hsa05415;hsa05142;hsa05143;hsa05146;hsa05022;hsa04310;hsa05163;hsa04540;hsa04371;hsa04621;hsa05200;hsa04071;hsa04070;hsa04015;hsa04072;hsa04750;hsa04915;hsa04934;hsa04935;hsa04918;hsa04919;hsa…	Shigellosis;Platelet activation;Neutrophil extracellular trap formation;cGMP-PKG signaling pathway;Calcium signaling pathway;Parathyroid hormone synthesis, secretion and action;Long-term potentiation;Retrograde endocannabinoid signaling;Cholinergic synapse;Glutamatergic synapse;GnRH secretion;Serotonergic synapse;Cortisol synthesis and secretion;Dopaminergic synapse;Aldosterone synthesis and secr…	ENOG410XPSW	U:Intracellular trafficking, secretion, and vesicular transport	PF08703.15;PF00388.25;PF17787.7;PF00387.25;PF22631.2;PF09279.17;PF00168.36	PLC-beta_C;PI-PLC-X;PH_14;PI-PLC-Y;PLCB1-4-like_EFh;EF-hand_like;C2	PLC-beta C terminal;Phosphatidylinositol-specific phospholipase C, X domain;PH domain;Phosphatidylinositol-specific phospholipase C, Y domain;Phosphoinositide phospholipase C beta1-4-like EF-hand domain;Phosphoinositide-specific phospholipase C, efhand-like;C2 domain	cytoplasmic
ENSP00000434228.1	MYO18A	Unconventional myosin-XVIIIa	399687	pep chromosome:GRCh38:17:29073519:29180364:-1 gene:ENSG00000196535.20 transcript:ENST00000531253.5 gene_biotype:protein_coding transcript_biotype:protein_coding gene_symbol:MYO18A description:myosin XVIIIA [Source:HGNC Symbol;Acc:HGNC:31104]	1048.71	10.0344	4.507E-5	up	yes	104.871	0.1	0.1	0.1	0.1	0.1	0.1	0.1	101.16535535158	38.0364	151.628	104.81874476951	110.258	123.318	BP:regulation of secretion;BP:positive regulation of secretion;BP:regulation of transport;BP:membrane budding;BP:membrane organization;BP:cellular component organization or biogenesis;BP:asymmetric Golgi ribbon formation;BP:Golgi ribbon formation;BP:positive regulation of biological process;BP:negative regulation of biological process;BP:positive regulation of transport;BP:cell migration;BP:cell …	GO:0051046;GO:0051047;GO:0051049;GO:0006900;GO:0061024;GO:0071840;GO:0090164;GO:0090161;GO:0048518;GO:0048519;GO:0051050;GO:0016477;GO:0048870;GO:0016050;GO:0043030;GO:0051222;GO:0051223;GO:0042981;GO:0050708;GO:0016043;GO:0002684;GO:0065007;GO:0051130;GO:0070201;GO:0050794;GO:0008150;GO:0008152;GO:0050714;GO:0002694;GO:0002697;GO:0002699;GO:0051239;GO:0051128;GO:1903530;GO:1903532;GO:1904951;GO:…	K10362	MYO18	hsa04814	Motor proteins	COG5022	Z:Cytoskeleton	PF00063.27;PF01576.24;PF24556.1;PF17820.7;PF00595.29	Myosin_head;Myosin_tail_1;SH3_Myosin-XVIIIa;PDZ_6;PDZ	Myosin head;Myosin tail;Unconventional myosin-XVIIIa SH3 domain;PDZ domain;PDZ domain	cytoplasmic
ENSP00000216190.8	EIF3D	Eukaryotic translation initiation factor 3 subunit D	8664	pep chromosome:GRCh38:22:36510855:36529166:-1 gene:ENSG00000100353.18 transcript:ENST00000216190.13 gene_biotype:protein_coding transcript_biotype:protein_coding gene_symbol:EIF3D description:eukaryotic translation initiation factor 3 subunit D [Source:HGNC Symbol;Acc:HGNC:3278]	6.8609	2.7784	0.003385	up	yes	90.0862	13.1303	0.1	0.1	78.2815	0.1	0.1	0.1	47.2404	120.44	148.46	74.997859036305	85.368776051853	64.0103	BP:cellular component assembly;BP:regulation of primary metabolic process;BP:regulation of metabolic process;BP:positive regulation of biosynthetic process;BP:macromolecular complex subunit organization;BP:regulation of protein metabolic process;BP:positive regulation of gene expression;BP:formation of cytoplasmic translation initiation complex;BP:regulation of biological process;BP:cellular comp…	GO:0022607;GO:0080090;GO:0019222;GO:0009891;GO:0043933;GO:0051246;GO:0010628;GO:0001732;GO:0050789;GO:0071840;GO:0009893;GO:0071826;GO:0075522;GO:0075525;GO:0010604;GO:0051247;GO:0016043;GO:0065003;GO:0022618;GO:0065007;GO:0048522;GO:0048518;GO:0002183;GO:0045727;GO:0010468;GO:0060255;GO:0009987;GO:0009889;GO:0050794;GO:0008150;GO:0008152;GO:0010557;GO:0010556;GO:0016032;GO:0010608;GO:0006417;GO:…	K03251	EIF3D	------	------	ENOG410XP1E	J:Translation, ribosomal structure and biogenesis	PF05091.18	eIF-3_zeta	Eukaryotic translation initiation factor 3 subunit 7	cytoplasmic
ENSP00000267205.2	RHOF	Rho-related GTP-binding protein RhoF	54509	pep chromosome:GRCh38:12:121777754:121793688:-1 gene:ENSG00000139725.8 transcript:ENST00000267205.7 gene_biotype:protein_coding transcript_biotype:protein_coding gene_symbol:RHOF description:ras homolog family member F, filopodia associated [Source:HGNC Symbol;Acc:HGNC:15703]	3.2992	1.7221	0.04311	up	yes	77.982	23.6369	86.9414	0.1	0.1	0.1	0.1	54.48	64.256	140.973	73.0952	95.074667898826	8.57524	85.917853139436	BP:regulation of actin cytoskeleton organization;BP:regulation of response to stimulus;BP:regulation of cellular component organization;BP:signal transduction;BP:regulation of intracellular signal transduction;BP:regulation of signaling;BP:intracellular signal transduction;BP:regulation of cell communication;BP:cellular component organization or biogenesis;BP:regulation of signal transduction;BP:…	GO:0032956;GO:0048583;GO:0051128;GO:0007165;GO:1902531;GO:0023051;GO:0035556;GO:0010646;GO:0071840;GO:0009966;GO:0097435;GO:0051493;GO:0016043;GO:0050789;GO:0033043;GO:0065007;GO:0016477;GO:0051056;GO:0032970;GO:0009987;GO:0050794;GO:0008150;GO:0007264;GO:0007015;GO:0048870GO:0043229;GO:0043228;GO:0043227;GO:0043226;GO:0005856;GO:0030667;GO:1903561;GO:0031090;GO:0016020;GO:0031982;GO:0110165;GO:0…	K07872	RHOF, RIF	------	------	COG1100	G:Carbohydrate transport and metabolism	PF00071.28;PF08477.19;PF00025.27	Ras;Roc;Arf	Ras family;Ras of Complex, Roc, domain of DAPkinase;ADP-ribosylation factor family	cytoplasmic
ENSP00000330074.4	H1-5	Histone H1.5	3009	pep chromosome:GRCh38:6:27866792:27867588:-1 gene:ENSG00000184357.5 transcript:ENST00000331442.5 gene_biotype:protein_coding transcript_biotype:protein_coding gene_symbol:H1-5 description:H1.5 linker histone, cluster member [Source:HGNC Symbol;Acc:HGNC:4719]	30.9207	4.9505	0.007531	up	yes	98.0063	3.1696	0.1	0.1	0.1	0.1	0.1	18.5178	52.6789	236.508	57.272407236327	74.962913026148	76.576489929864	90.039260099451	BP:protein localization;BP:regulation of primary metabolic process;BP:regulation of metabolic process;BP:cellular component organization or biogenesis;BP:macromolecular complex assembly;BP:muscle organ development;BP:negative regulation of macromolecule metabolic process;BP:cellular macromolecule localization;BP:animal organ development;BP:negative regulation of biological process;BP:macromolecul…	GO:0008104;GO:0080090;GO:0019222;GO:0071840;GO:0065003;GO:0007517;GO:0010605;GO:0070727;GO:0048513;GO:0048519;GO:0033036;GO:0051053;GO:0051052;GO:0060255;GO:2001141;GO:0030261;GO:0045910;GO:0000018;GO:0006334;GO:0022607;GO:0009892;GO:0009890;GO:0050821;GO:0050789;GO:0016043;GO:0065007;GO:0065004;GO:0065008;GO:0009889;GO:0050794;GO:0008150;GO:0051234;GO:0031647;GO:0070199;GO:0006355;GO:0010556;GO:…	K11275	H1_5	------	------	ENOG4112541	S:Function unknown	PF00538.25	Linker_histone	linker histone H1 and H5 family	nuclear
ENSP00000264904.7	USO1	General vesicular transport factor p115	8615	pep chromosome:GRCh38:4:75724598:75814286:1 gene:ENSG00000138768.15 transcript:ENST00000264904.8 gene_biotype:protein_coding transcript_biotype:protein_coding gene_symbol:USO1 description:USO1 vesicle transport factor [Source:HGNC Symbol;Acc:HGNC:30904]	59.1954	5.8874	0.0001964	up	yes	97.4178	1.6457	9.37399	0.1	0.1	0.1	0.1	0.1	48.8879	105.569	169.59	88.504788134101	100.218	71.737656541475	BP:protein localization;BP:small GTPase mediated signal transduction;BP:regulation of biological process;BP:regulation of response to stimulus;BP:vesicle organization;BP:membrane fusion;BP:membrane organization;BP:multicellular organismal process;BP:signal transduction;BP:intracellular signal transduction;BP:cellular component organization or biogenesis;BP:organelle membrane fusion;BP:secretory g…	GO:0008104;GO:0007264;GO:0050789;GO:0048583;GO:0016050;GO:0061025;GO:0061024;GO:0032501;GO:0007165;GO:0035556;GO:0071840;GO:0090174;GO:0032252;GO:0006888;GO:0070727;GO:0140056;GO:0006886;GO:0045056;GO:0016043;GO:0071705;GO:0065007;GO:0006906;GO:0033036;GO:0009987;GO:0048280;GO:0048193;GO:0006810;GO:0048211;GO:0050794;GO:0045184;GO:0048278;GO:0008150;GO:0051648;GO:0051649;GO:0051234;GO:0051179;GO:…	------	------	------	------	ENOG410XRCG	U:Intracellular trafficking, secretion, and vesicular transport	PF04869.20;PF18770.7;PF04871.18	Uso1_p115_head;Arm_vescicular;Uso1_p115_C	Uso1 / p115 like vesicle tethering protein, head region;Armadillo tether-repeat of vescicular transport factor;Uso1 / p115 like vesicle tethering protein, C terminal region	cytoplasmic
ENSP00000203786.8	ARHGAP4	Rho GTPase-activating protein 4	393	pep chromosome:GRCh38:X:153907378:153926264:-1 gene:ENSG00000089820.17 transcript:ENST00000350060.10 gene_biotype:protein_coding transcript_biotype:protein_coding gene_symbol:ARHGAP4 description:Rho GTPase activating protein 4 [Source:HGNC Symbol;Acc:HGNC:674]	8.3663	3.0646	0.001353	up	yes	85.1577	10.1786	60.5714	0.1	0.1	0.1	0.1	0.1	65.149067388321	125.318	124.873	43.962734802698	64.956485955953	86.6877	BP:regulation of response to stimulus;BP:signal transduction;BP:regulation of extent of cell growth;BP:negative regulation of cell projection organization;BP:regulation of cell projection organization;BP:cellular component organization or biogenesis;BP:regulation of signal transduction;BP:negative regulation of cell development;BP:negative regulation of biological process;BP:regulation of small G…	GO:0048583;GO:0007165;GO:0061387;GO:0031345;GO:0031344;GO:0071840;GO:0009966;GO:0010721;GO:0048519;GO:0051056;GO:0010977;GO:0010975;GO:0030517;GO:0030516;GO:0022603;GO:0035556;GO:0120035;GO:0050789;GO:0016043;GO:0065007;GO:0048640;GO:0050793;GO:0050794;GO:0008150;GO:0051239;GO:1902531;GO:0051961;GO:0051960;GO:2000145;GO:2000146;GO:0048638;GO:0030308;GO:0051129;GO:0051128;GO:0060284;GO:0023051;GO:…	K20122	ARHGAP4	------	------	ENOG410YF76	Z:Cytoskeleton	PF00620.32;PF14604.12;PF00018.34;PF07653.23;PF00611.28	RhoGAP;SH3_9;SH3_1;SH3_2;FCH	RhoGAP domain;Variant SH3 domain;SH3 domain;Variant SH3 domain;Fes/CIP4, and EFC/F-BAR homology domain	cytoplasmic
ENSP00000344055.4	AP3D1	AP-3 complex subunit delta-1	8943	pep chromosome:GRCh38:19:2100988:2151557:-1 gene:ENSG00000065000.20 transcript:ENST00000345016.9 gene_biotype:protein_coding transcript_biotype:protein_coding gene_symbol:AP3D1 description:adaptor related protein complex 3 subunit delta 1 [Source:HGNC Symbol;Acc:HGNC:568]	950.325	9.8923	0.0001342	up	yes	95.0325	0.1	0.1	0.1	0.1	0.1	0.1	0.1	96.368220806676	112.969	51.808	76.5209	161.559	70.969647544428	BP:synaptic vesicle transport along microtubule;BP:synaptic vesicle cytoskeletal transport;BP:protein localization;BP:regulation of primary metabolic process;BP:regulation of metabolic process;BP:positive regulation of alpha-beta T cell differentiation;BP:regulation of alpha-beta T cell differentiation;BP:melanosome organization;BP:regulation of alpha-beta T cell activation;BP:vesicle coating;BP:…	GO:0099517;GO:0099514;GO:0008104;GO:0080090;GO:0019222;GO:0046638;GO:0046637;GO:0032438;GO:0046634;GO:0006901;GO:0006900;GO:0099518;GO:0061024;GO:0060155;GO:0016043;GO:0006829;GO:0051650;GO:0071840;GO:0016182;GO:0016183;GO:0010604;GO:0070727;GO:0010720;GO:0048518;GO:0065007;GO:0097479;GO:0033036;GO:0046635;GO:0099111;GO:0060255;GO:0006623;GO:0006605;GO:0045184;GO:1903708;GO:0010970;GO:0072657;GO:…	K12396	AP3D	hsa04142	Lysosome	ENOG410XQFB	U:Intracellular trafficking, secretion, and vesicular transport	PF01602.26;PF06375.16;PF12717.13;PF22928.2;PF13646.12	Adaptin_N;AP3D1;Cnd1;INTS1_R4;HEAT_2	Adaptin N terminal region;AP-3 complex subunit delta-1;non-SMC mitotic condensation complex subunit 1;Integrator complex subunit 1, R4 domain;HEAT repeats	nuclear
ENSP00000264934.5	MTMR12	Myotubularin-related protein 12	54545	pep chromosome:GRCh38:5:32229608:32312969:-1 gene:ENSG00000150712.11 transcript:ENST00000264934.5 gene_biotype:protein_coding transcript_biotype:protein_coding gene_symbol:MTMR12 description:myotubularin related protein 12 [Source:HGNC Symbol;Acc:HGNC:18191]	950.099	9.8919	0.0007126	up	yes	95.0099	0.1	0.1	0.1	0.1	0.1	0.1	0.1	98.292729217216	74.2323	187.532	46.9126	81.153	81.936500470363	BP:dephosphorylation;BP:glycerophospholipid metabolic process;BP:phosphatidylinositol dephosphorylation;BP:phospholipid dephosphorylation;BP:phospholipid metabolic process;BP:lipid metabolic process;BP:primary metabolic process;BP:cellular process;BP:phosphatidylinositol metabolic process;BP:metabolic process;BP:glycerolipid metabolic process;BP:lipid modification;BP:phosphate-containing compound…	GO:0016311;GO:0006650;GO:0046856;GO:0046839;GO:0006644;GO:0006629;GO:0044238;GO:0009987;GO:0046488;GO:0008152;GO:0046486;GO:0030258;GO:0006796;GO:0006793;GO:0019637;GO:0008150GO:0005783;GO:0030017;GO:0043229;GO:0043227;GO:0043226;GO:0005737;GO:0016020;GO:0110165;GO:0043231;GO:0005829;GO:0005575;GO:0016529GO:0016791;GO:0042578;GO:0003674;GO:0016787;GO:0016788;GO:0003824;GO:0052866;GO:0052744;GO:00…	K18085	MTMR10_11_12	------	------	ENOG410XPTU	O:Posttranslational modification, protein turnover, chaperones	PF12578.13;PF06602.19	3-PAP;Myotub-related	Myotubularin-associated protein;Myotubularin-like phosphatase domain	cytoplasmic
ENSP00000262679.8	NRDC	Nardilysin	4898	pep chromosome:GRCh38:1:51789210:51878727:-1 gene:ENSG00000078618.23 transcript:ENST00000352171.12 gene_biotype:protein_coding transcript_biotype:protein_coding gene_symbol:NRDC description:nardilysin convertase [Source:HGNC Symbol;Acc:HGNC:7995]	6.59	2.7203	0.0003269	up	yes	81.9988	12.4429	0.1	74.1575	0.1	0.1	0.1	0.1	85.4143	92.021190016677	68.7218	78.530309236437	73.4507	93.854565721572	BP:regulation of membrane protein ectodomain proteolysis;BP:positive regulation of membrane protein ectodomain proteolysis;BP:regulation of primary metabolic process;BP:regulation of metabolic process;BP:regulation of cell projection organization;BP:positive regulation of cell projection organization;BP:hormone metabolic process;BP:hormone catabolic process;BP:positive regulation of macromolecule…	GO:0051043;GO:0051044;GO:0080090;GO:0019222;GO:0031344;GO:0031346;GO:0042445;GO:0042447;GO:0010604;GO:0010720;GO:0048518;GO:0048519;GO:0060255;GO:0030162;GO:0010975;GO:0120161;GO:0019538;GO:0120163;GO:0009896;GO:0009894;GO:0009892;GO:0009893;GO:0022603;GO:0120035;GO:0065007;GO:0065009;GO:0065008;GO:0051130;GO:0050793;GO:0050790;GO:0050794;GO:0008150;GO:0051239;GO:0051336;GO:0051603;GO:0031644;GO:…	K01411	NRD1	------	------	COG1025	O:Posttranslational modification, protein turnover, chaperones	PF16187.10;PF05193.26;PF00675.25;PF22456.1	Peptidase_M16_M;Peptidase_M16_C;Peptidase_M16;PqqF-like_C_4	Middle or third domain of peptidase_M16;Peptidase M16 inactive domain;Insulinase;PQQ synthase PqqF-like, C-terminal lobe domain 4	mitochondrial
ENSP00000428424.1	LYN	Tyrosine-protein kinase Lyn	4067	pep chromosome:GRCh38:8:55879835:56014168:1 gene:ENSG00000254087.8 transcript:ENST00000520220.6 gene_biotype:protein_coding transcript_biotype:protein_coding gene_symbol:LYN description:LYN proto-oncogene, Src family tyrosine kinase [Source:HGNC Symbol;Acc:HGNC:6735]	7.7429	2.9529	0.004081	up	yes	82.8337	10.698	0.1	0.1	0.1	0.1	63.6881	0.1	46.8617	155.579	90.8057	84.751096496907	47.9559	71.049143998869	BP:regulation of secretion;BP:regulation of transport;BP:eosinophil differentiation;BP:regulation of leukocyte mediated immunity;BP:cellular response to stimulus;BP:response to external biotic stimulus;BP:granulocyte differentiation;BP:positive regulation of response to stimulus;BP:cell development;BP:regulation of phosphorylation;BP:positive regulation of phosphorylation;BP:negative regulation o…	GO:0051046;GO:0051049;GO:0030222;GO:0002703;GO:0051716;GO:0043207;GO:0030851;GO:0048584;GO:0048468;GO:0042325;GO:0042327;GO:0042326;GO:0009607;GO:0009605;GO:0009892;GO:0009893;GO:0031175;GO:0120036;GO:0035556;GO:0120035;GO:0050789;GO:0006887;GO:0002684;GO:0002685;GO:0002682;GO:0002683;GO:1903305;GO:0002688;GO:1903131;GO:0038159;GO:0043410;GO:0002521;GO:0010556;GO:0009967;GO:0034142;GO:0030889;GO:…	K05854	LYN	hsa05120;hsa04611;hsa05203;hsa04662;hsa04664;hsa05169;hsa04666;hsa04064;hsa05167;hsa04062;hsa04730;hsa05417	Epithelial cell signaling in Helicobacter pylori infection;Platelet activation;Viral carcinogenesis;B cell receptor signaling pathway;Fc epsilon RI signaling pathway;Epstein-Barr virus infection;Fc gamma R-mediated phagocytosis;NF-kappa B signaling pathway;Kaposi sarcoma-associated herpesvirus infection;Chemokine signaling pathway;Long-term depression;Lipid and atherosclerosis	COG0515	A:RNA processing and modification	PF07714.23;PF00069.31;PF00017.30;PF00018.34;PF07653.23;PF14604.12	PK_Tyr_Ser-Thr;Pkinase;SH2;SH3_1;SH3_2;SH3_9	Protein tyrosine and serine/threonine kinase;Protein kinase domain;SH2 domain;SH3 domain;Variant SH3 domain;Variant SH3 domain	cytoplasmic
ENSP00000377440.3	RAB5C	Ras-related protein Rab-5C	5878	pep chromosome:GRCh38:17:42124978:42155044:-1 gene:ENSG00000108774.15 transcript:ENST00000393860.7 gene_biotype:protein_coding transcript_biotype:protein_coding gene_symbol:RAB5C description:RAB5C, member RAS oncogene family [Source:HGNC Symbol;Acc:HGNC:9785]	7.7362	2.9516	0.0004946	up	yes	81.2396	10.5012	19.5232	0.1	0.1	43.0839	0.1	0.1	63.7979	86.666101078928	67.873059586602	56.230171129494	137.164	75.706515488986	BP:protein localization;BP:plasma membrane to endosome transport;BP:cellular localization;BP:establishment of localization;BP:cellular macromolecule localization;BP:intracellular protein transport;BP:nitrogen compound transport;BP:macromolecule localization;BP:transport;BP:cellular process;BP:establishment of protein localization;BP:biological_process;BP:establishment of localization in cell;BP:l…	GO:0008104;GO:0048227;GO:0051641;GO:0051234;GO:0070727;GO:0006886;GO:0071705;GO:0033036;GO:0006810;GO:0009987;GO:0045184;GO:0008150;GO:0051649;GO:0051179;GO:0006897;GO:0046907;GO:0015031;GO:0098657;GO:0016192GO:0005886;GO:0048770;GO:0043232;GO:0031901;GO:0030658;GO:0043229;GO:0043228;GO:0030667;GO:0043227;GO:0043226;GO:0010008;GO:0016020;GO:0012505;GO:0070062;GO:0031410;GO:0005811;GO:0005774;GO:0…	K07889	RAB5C	hsa04962;hsa05132;hsa04014;hsa04145;hsa04144;hsa04137;hsa05152;hsa04148;hsa05146	Vasopressin-regulated water reabsorption;Salmonella infection;Ras signaling pathway;Phagosome;Endocytosis;Mitophagy - animal;Tuberculosis;Efferocytosis;Amoebiasis	ENOG410YCCP	S:Function unknown	PF00071.28;PF08477.19;PF00025.27	Ras;Roc;Arf	Ras family;Ras of Complex, Roc, domain of DAPkinase;ADP-ribosylation factor family	cytoplasmic
ENSP00000296370.3	S100P	Protein S100-P	6286	pep chromosome:GRCh38:4:6693878:6697170:1 gene:ENSG00000163993.7 transcript:ENST00000296370.4 gene_biotype:protein_coding transcript_biotype:protein_coding gene_symbol:S100P description:S100 calcium binding protein P [Source:HGNC Symbol;Acc:HGNC:10504]	2.9746	1.5727	0.02149	up	yes	68.5529	23.046	0.1	54.0329	0.1	0.1	0.1	83.843	69.8068	101.981	58.626789709486	54.392262429838	54.633110438753	71.878036444345	BP:regulation of cell proliferation;BP:positive regulation of response to stimulus;BP:regulation of response to stimulus;BP:positive regulation of signaling;BP:regulation of biological process;BP:regulation of signaling;BP:positive regulation of cell communication;BP:regulation of cell communication;BP:endothelial cell migration;BP:regulation of intracellular signal transduction;BP:regulation of …	GO:0042127;GO:0048584;GO:0048583;GO:0023056;GO:0050789;GO:0023051;GO:0010647;GO:0010646;GO:0043542;GO:1902531;GO:0009966;GO:0009967;GO:0065007;GO:0048518;GO:0043123;GO:0008284;GO:0009987;GO:0050794;GO:0008150;GO:1902533;GO:0010033;GO:0016477;GO:0048870;GO:0043122;GO:0048522GO:0016020;GO:0005783;GO:0098590;GO:0031974;GO:0043227;GO:0043226;GO:0031983;GO:0070062;GO:0005634;GO:0060205;GO:0005654;GO:0…	K23771	S100P	------	------	ENOG410YX5D	S:Function unknown	PF01023.25;PF13499.12	S_100;EF-hand_7	S-100/ICaBP type calcium binding domain;EF-hand domain pair	cytoplasmic
ENSP00000263864.5	VAMP8	Vesicle-associated membrane protein 8	8673	pep chromosome:GRCh38:2:85577586:85582031:1 gene:ENSG00000118640.11 transcript:ENST00000263864.10 gene_biotype:protein_coding transcript_biotype:protein_coding gene_symbol:VAMP8 description:vesicle associated membrane protein 8 [Source:HGNC Symbol;Acc:HGNC:12647]	900.12	9.814	5.985E-5	up	yes	90.012	0.1	0.1	0.1	0.1	0.1	0.1	0.1	64.4822	98.8986	34.7629	116.42252984837	108.75672655336	116.74874613473	BP:protein localization;BP:regulation of secretion;BP:positive regulation of secretion;BP:negative regulation of secretion;BP:regulation of transport;BP:vesicle fusion;BP:regulation of response to stimulus;BP:membrane fusion;BP:membrane organization;BP:regulation of leukocyte mediated immunity;BP:positive regulation of mast cell degranulation;BP:cellular component organization or biogenesis;BP:po…	GO:0008104;GO:0051046;GO:0051047;GO:0051048;GO:0051049;GO:0006906;GO:0048583;GO:0061025;GO:0061024;GO:0002703;GO:0043306;GO:0071840;GO:0032103;GO:0065003;GO:0050729;GO:0043207;GO:0070727;GO:0009615;GO:0050727;GO:0044419;GO:0048518;GO:0048519;GO:0033036;GO:0048584;GO:0051051;GO:0051050;GO:0045184;GO:0009607;GO:0051701;GO:0051707;GO:0031349;GO:1903305;GO:0009605;GO:0090174;GO:0016050;GO:0060627;GO:…	K08512	VAMP8	hsa04140;hsa04130;hsa04611	Autophagy - animal;SNARE interactions in vesicular transport;Platelet activation	COG5143	U:Intracellular trafficking, secretion, and vesicular transport	PF00957.27	Synaptobrevin	Synaptobrevin	cytoplasmic
ENSP00000215071.4	PSMD8	26S proteasome non-ATPase regulatory subunit 8	5714	pep chromosome:GRCh38:19:38374571:38383824:1 gene:ENSG00000099341.13 transcript:ENST00000215071.9 gene_biotype:protein_coding transcript_biotype:protein_coding gene_symbol:PSMD8 description:proteasome 26S subunit, non-ATPase 8 [Source:HGNC Symbol;Acc:HGNC:9566]	895.06	9.8058	7.024E-7	up	yes	89.506	0.1	0.1	0.1	0.1	0.1	0.1	0.1	81.408680131152	114.684	113.11810057785	78.673763099944	84.293550931094	64.857881648102	BP:modification-dependent macromolecule catabolic process;BP:proteasome-mediated ubiquitin-dependent protein catabolic process;BP:proteolysis;BP:primary metabolic process;BP:cellular process;BP:modification-dependent protein catabolic process;BP:biological_process;BP:protein catabolic process;BP:metabolic process;BP:catabolic process;BP:macromolecule catabolic process;BP:proteolysis involved in c…	GO:0043632;GO:0043161;GO:0006508;GO:0044238;GO:0009987;GO:0019941;GO:0008150;GO:0030163;GO:0008152;GO:0009056;GO:0009057;GO:0051603;GO:0019538;GO:0010498;GO:0043170;GO:0006511GO:0043229;GO:0043227;GO:0043226;GO:0008541;GO:0005634;GO:0110165;GO:0032991;GO:0043231;GO:0005829;GO:0005575	K03031	PSMD8, RPN12	hsa03050;hsa05020;hsa05022;hsa05014;hsa05016;hsa05017;hsa05010;hsa05012;hsa05169	Proteasome;Prion disease;Pathways of neurodegeneration - multiple diseases;Amyotrophic lateral sclerosis;Huntington disease;Spinocerebellar ataxia;Alzheimer disease;Parkinson disease;Epstein-Barr virus infection	ENOG410XXP2	O:Posttranslational modification, protein turnover, chaperones	PF10075.15	CSN8_PSD8_EIF3K	CSN8/PSMD8/EIF3K family	mitochondrial
ENSP00000381917.3	EIF3CL	Eukaryotic translation initiation factor 3 subunit C-like protein	728689	pep chromosome:GRCh38:16:28379579:28403841:-1 gene:ENSG00000205609.13 transcript:ENST00000398944.7 gene_biotype:protein_coding transcript_biotype:protein_coding gene_symbol:EIF3CL description:eukaryotic translation initiation factor 3 subunit C like [Source:HGNC Symbol;Acc:HGNC:26347]	12.1134	3.5985	0.0002926	up	yes	82.6873	6.8261	40.4566	0.1	0.1	0.1	0.1	0.1	92.056748620212	46.1514	134.64627288219	72.433950598632	85.0258	65.809808371135	BP:cellular component assembly;BP:positive regulation of RNA binding;BP:positive regulation of metabolic process;BP:regulation of metabolic process;BP:positive regulation of biosynthetic process;BP:macromolecular complex subunit organization;BP:positive regulation of gene expression;BP:formation of cytoplasmic translation initiation complex;BP:regulation of biological process;BP:cellular componen…	GO:0022607;GO:1905216;GO:0009893;GO:0019222;GO:0009891;GO:0043933;GO:0010628;GO:0001732;GO:0050789;GO:0071840;GO:0080090;GO:0071826;GO:0010604;GO:0010608;GO:0051246;GO:0051247;GO:0016043;GO:0065003;GO:0022618;GO:0065007;GO:0044093;GO:0048518;GO:0065009;GO:0045727;GO:0010468;GO:0060255;GO:0009987;GO:0009889;GO:0050794;GO:0008150;GO:0008152;GO:1902415;GO:1902416;GO:0051099;GO:0051098;GO:0010557;GO:…	K03252	EIF3C	------	------	ENOG410XRU3	J:Translation, ribosomal structure and biogenesis	PF05470.18;PF01399.33	eIF-3c_N;PCI	Eukaryotic translation initiation factor 3 subunit 8 N-terminus;PCI domain	cytoplasmic
ENSP00000272930.4	UBE2F	NEDD8-conjugating enzyme UBE2F	140739	pep chromosome:GRCh38:2:237967014:238042782:1 gene:ENSG00000184182.19 transcript:ENST00000272930.9 gene_biotype:protein_coding transcript_biotype:protein_coding gene_symbol:UBE2F description:ubiquitin conjugating enzyme E2 F (putative) [Source:HGNC Symbol;Acc:HGNC:12480]	842.659	9.7188	4.508E-5	up	yes	84.2659	0.1	0.1	0.1	0.1	0.1	0.1	0.1	49.1276	133.782	80.5273	76.987	102.35969453436	62.812335684238	BP:protein neddylation;BP:protein modification by small protein conjugation or removal;BP:protein modification by small protein conjugation;BP:post-translational protein modification;BP:cellular process;BP:macromolecule modification;BP:protein modification process;BP:biological_process;BP:metabolic process;BP:primary metabolic process;BP:protein metabolic process;BP:macromolecule metabolic proces…	GO:0045116;GO:0070647;GO:0032446;GO:0043687;GO:0009987;GO:0043412;GO:0036211;GO:0008150;GO:0008152;GO:0044238;GO:0019538;GO:0043170GO:0043229;GO:0043227;GO:0043226;GO:0005634;GO:0110165;GO:0043231;GO:0005829;GO:0005575GO:0061650;GO:0035639;GO:0061663;GO:0032553;GO:0003674;GO:0005488;GO:0000166;GO:1901265;GO:0019787;GO:0043167;GO:0019788;GO:0016740;GO:0016746;GO:0032559;GO:0043168;GO:0140096;GO:00…	K10687	UBE2F	hsa04120	Ubiquitin mediated proteolysis	ENOG410XS81	O:Posttranslational modification, protein turnover, chaperones	PF00179.31	UQ_con	Ubiquitin-conjugating enzyme	cytoplasmic
ENSP00000321584.4	IMPDH2	Inosine-5'-monophosphate dehydrogenase 2	3615	pep chromosome:GRCh38:3:49024325:49029398:-1 gene:ENSG00000178035.13 transcript:ENST00000326739.9 gene_biotype:protein_coding transcript_biotype:protein_coding gene_symbol:IMPDH2 description:inosine monophosphate dehydrogenase 2 [Source:HGNC Symbol;Acc:HGNC:6053]	842.077	9.7178	0.001255	up	yes	84.2077	0.1	0.1	0.1	0.1	0.1	0.1	0.1	37.084	84.7415	172.325	58.614625994436	76.288754223419	76.1929	BP:purine ribonucleoside monophosphate metabolic process;BP:nucleotide biosynthetic process;BP:small molecule metabolic process;BP:ribonucleoside monophosphate metabolic process;BP:purine ribonucleoside monophosphate biosynthetic process;BP:rhythmic process;BP:ribonucleoside triphosphate metabolic process;BP:purine ribonucleoside triphosphate biosynthetic process;BP:purine ribonucleoside triphosp…	GO:0009167;GO:0009165;GO:0044281;GO:0009161;GO:0009168;GO:0048511;GO:0009199;GO:0009206;GO:0009205;GO:0046039;GO:0009201;GO:0046037;GO:0046649;GO:0006163;GO:0006164;GO:0019637;GO:0009141;GO:0009142;GO:0009144;GO:0009145;GO:0032943;GO:0046651;GO:0002376;GO:0071353;GO:0009127;GO:0007623;GO:0034097;GO:0006139;GO:0009156;GO:0009152;GO:0009150;GO:0009260;GO:0001775;GO:0008150;GO:0008152;GO:0034654;GO:…	K00088	IMPDH, guaB	hsa00983;hsa00230;hsa01232;hsa01100	Drug metabolism - other enzymes;Purine metabolism;Nucleotide metabolism;Metabolic pathways	COG0517;COG0516	S:Function unknown;F:Nucleotide transport and metabolism	PF00478.31;PF00571.33;PF03060.21;PF01070.24;PF00977.27	IMPDH;CBS;NMO;FMN_dh;His_biosynth	IMP dehydrogenase / GMP reductase domain;CBS domain;Nitronate monooxygenase;FMN-dependent dehydrogenase;Histidine biosynthesis protein	cytoplasmic
ENSP00000396616.2	EPB42	Protein 4.2	2038	pep chromosome:GRCh38:15:43197227:43221018:-1 gene:ENSG00000166947.15 transcript:ENST00000441366.7 gene_biotype:protein_coding transcript_biotype:protein_coding gene_symbol:EPB42 description:erythrocyte membrane protein band 4.2 [Source:HGNC Symbol;Acc:HGNC:3381]	12.8945	3.6887	0.0009871	up	yes	77.696	6.0255	0.1	0.1	0.1	35.6528	0.1	0.1	35.9319	29.9444	94.1533	94.9915	112.45824976475	98.696879222374	BP:regulation of cell morphogenesis;BP:hemoglobin metabolic process;BP:regulation of anatomical structure morphogenesis;BP:ion homeostasis;BP:cell maturation;BP:macromolecule metabolic process;BP:inorganic ion homeostasis;BP:anatomical structure morphogenesis;BP:developmental maturation;BP:regulation of biological process;BP:protein metabolic process;BP:cell morphogenesis;BP:cellular developmenta…	GO:0022604;GO:0020027;GO:0022603;GO:0050801;GO:0048469;GO:0043170;GO:0098771;GO:0009653;GO:0021700;GO:0050789;GO:0019538;GO:0000902;GO:0048869;GO:0048513;GO:0065007;GO:0048536;GO:0048534;GO:0065008;GO:0032502;GO:0032501;GO:0044238;GO:0050793;GO:0009987;GO:0008360;GO:0008150;GO:0008152;GO:0055080;GO:0071695;GO:0042592;GO:0048871;GO:0048856;GO:0048878;GO:0060586;GO:0043249GO:0043226;GO:0043229;GO:0…	K25094	EPB42	------	------	ENOG410YC7E	S:Function unknown	PF00927.28;PF00868.26;PF01841.26	Transglut_C;Transglut_N;Transglut_core	Transglutaminase family, C-terminal ig like domain;Transglutaminase family;Transglutaminase-like superfamily	cytoplasmic
ENSP00000408288.3	PPP1R3E	Protein phosphatase 1 regulatory subunit 3E	90673	pep chromosome:GRCh38:14:23295652:23302859:-1 gene:ENSG00000235194.9 transcript:ENST00000452015.9 gene_biotype:protein_coding transcript_biotype:protein_coding gene_symbol:PPP1R3E description:protein phosphatase 1 regulatory subunit 3E [Source:HGNC Symbol;Acc:HGNC:14943]	11.8346	3.5649	7.274E-5	up	yes	76.3961	6.4553	0.1	0.1	0.1	0.1	38.232	0.1	76.3451	74.513	115.76488076611	51.1239	74.843742780693	65.786180276716	BP:regulation of primary metabolic process;BP:regulation of metabolic process;BP:positive regulation of biosynthetic process;BP:positive regulation of glucose metabolic process;BP:generation of precursor metabolites and energy;BP:positive regulation of carbohydrate metabolic process;BP:regulation of polysaccharide biosynthetic process;BP:regulation of glucan biosynthetic process;BP:positive regul…	GO:0080090;GO:0019222;GO:0009891;GO:0010907;GO:0006091;GO:0045913;GO:0032885;GO:0010962;GO:0009893;GO:0043255;GO:0010604;GO:0043467;GO:0050789;GO:0006112;GO:0032881;GO:0048518;GO:0065007;GO:0062012;GO:0060255;GO:0009889;GO:0009987;GO:0050794;GO:0008150;GO:0008152;GO:0045725;GO:0062013;GO:0070873;GO:0070875;GO:0044042;GO:0044238;GO:0005975;GO:0015980;GO:0005977;GO:0005976;GO:0005979;GO:0010906;GO:…	K07189	PPP1R3	hsa04910;hsa04931	Insulin signaling pathway;Insulin resistance	ENOG4111FT1	T:Signal transduction mechanisms	PF03370.18	CBM_21	Carbohydrate/starch-binding module	cytoplasmic
ENSP00000302768.3	PAIP1	Polyadenylate-binding protein-interacting protein 1	10605	pep chromosome:GRCh38:5:43526267:43557077:-1 gene:ENSG00000172239.14 transcript:ENST00000306846.8 gene_biotype:protein_coding transcript_biotype:protein_coding gene_symbol:PAIP1 description:poly(A) binding protein interacting protein 1 [Source:HGNC Symbol;Acc:HGNC:16945]	807.327	9.657	0.0003154	up	yes	80.7327	0.1	0.1	0.1	0.1	0.1	0.1	0.1	42.2874	116.94451594831	114.449	101.612	31.792	77.311404772904	BP:regulation of catabolic process;BP:negative regulation of catabolic process;BP:negative regulation of metabolic process;BP:regulation of primary metabolic process;BP:regulation of metabolic process;BP:positive regulation of biosynthetic process;BP:viral translation;BP:negative regulation of mRNA catabolic process;BP:metabolic process;BP:positive regulation of gene expression;BP:CRD-mediated mR…	GO:0009894;GO:0009895;GO:0009892;GO:0080090;GO:0019222;GO:0009891;GO:0019081;GO:1902373;GO:0008152;GO:0010628;GO:0070934;GO:0050789;GO:0009893;GO:0044794;GO:0010605;GO:0010604;GO:0043489;GO:0043488;GO:0043487;GO:0010608;GO:0051246;GO:0051247;GO:0051851;GO:0044419;GO:0019219;GO:1900152;GO:1900151;GO:0048518;GO:0065007;GO:2000767;GO:0065008;GO:0010468;GO:0009987;GO:0045934;GO:0060255;GO:0006446;GO:…	K14322	PAIP1	------	------	ENOG41109D3	S:Function unknown	PF02854.25	MIF4G	MIF4G domain	cytoplasmic
ENSP00000339479.5	NT5C2	Cytosolic purine 5'-nucleotidase	22978	pep chromosome:GRCh38:10:103088018:103193306:-1 gene:ENSG00000076685.19 transcript:ENST00000343289.9 gene_biotype:protein_coding transcript_biotype:protein_coding gene_symbol:NT5C2 description:5'-nucleotidase, cytosolic II [Source:HGNC Symbol;Acc:HGNC:8022]	799.211	9.6424	4.662E-7	up	yes	79.9211	0.1	0.1	0.1	0.1	0.1	0.1	0.1	87.445806340592	48.0761	82.2296	75.200144287753	95.6222	90.952846970036	BP:negative regulation of defense response to virus by host;BP:organophosphate catabolic process;BP:negative regulation of defense response to virus;BP:regulation of response to stimulus;BP:nucleotide catabolic process;BP:negative regulation of defense response;BP:deoxyribonucleoside monophosphate metabolic process;BP:small molecule metabolic process;BP:ribonucleoside monophosphate metabolic proc…	GO:0050689;GO:0046434;GO:0050687;GO:0048583;GO:0009166;GO:0031348;GO:0009162;GO:0044281;GO:0009161;GO:0032102;GO:0070936;GO:0031347;GO:0050688;GO:0070647;GO:0032446;GO:0048519;GO:0048585;GO:0000255;GO:0046037;GO:0009170;GO:0046128;GO:0009167;GO:0019538;GO:0006163;GO:0016567;GO:0019637;GO:0002832;GO:0006195;GO:0050789;GO:0006204;GO:0000209;GO:0065007;GO:0009169;GO:0009158;GO:0009154;GO:0009150;GO:…	K01081	E3.1.3.5	hsa00760;hsa01100;hsa01232;hsa00240;hsa00230	Nicotinate and nicotinamide metabolism;Metabolic pathways;Nucleotide metabolism;Pyrimidine metabolism;Purine metabolism	ENOG410XQAV	S:Function unknown	PF05761.20	5_nucleotid	5' nucleotidase family	cytoplasmic
ENSP00000323889.4	TRIM25	E3 ubiquitin/ISG15 ligase TRIM25	7706	pep chromosome:GRCh38:17:56887909:56914049:-1 gene:ENSG00000121060.19 transcript:ENST00000316881.9 gene_biotype:protein_coding transcript_biotype:protein_coding gene_symbol:TRIM25 description:tripartite motif containing 25 [Source:HGNC Symbol;Acc:HGNC:12932]	12.7603	3.6736	7.423E-5	up	yes	73.4341	5.7549	34.0291	0.1	0.1	0.1	0.1	0.1	65.858638342709	75.2206	113.383	51.728884485566	58.6401	75.773789245563	BP:regulation of primary metabolic process;BP:regulation of metabolic process;BP:positive regulation of response to stimulus;BP:regulation of response to stimulus;BP:positive regulation of defense response;BP:signal transduction;BP:protein K48-linked ubiquitination;BP:regulation of defense response;BP:cellular response to stimulus;BP:response to external biotic stimulus;BP:regulation of signal tr…	GO:0080090;GO:0019222;GO:0048584;GO:0048583;GO:0031349;GO:0007165;GO:0070936;GO:0031347;GO:0051716;GO:0043207;GO:0009966;GO:0009615;GO:0044419;GO:0032446;GO:0044093;GO:0048518;GO:0048519;GO:0044790;GO:0043122;GO:0043123;GO:0060255;GO:0050776;GO:0030163;GO:2001141;GO:0051701;GO:0051707;GO:0009607;GO:0009605;GO:0019538;GO:0031667;GO:0002376;GO:0016567;GO:0033554;GO:0010647;GO:0023051;GO:0002831;GO:…	K10652	TRIM25, EFP	hsa05164;hsa04064;hsa04622	Influenza A;NF-kappa B signaling pathway;RIG-I-like receptor signaling pathway	ENOG410XQS1	O:Posttranslational modification, protein turnover, chaperones	PF00622.36;PF13765.14;PF13445.12;PF15227.12;PF00097.31;PF13923.12;PF13639.12;PF13920.12;PF14634.12	SPRY;PRY;zf-RING_UBOX;zf-C3HC4_4;zf-C3HC4;zf-C3HC4_2;zf-RING_2;zf-C3HC4_3;zf-RING_5	SPRY domain;SPRY-associated domain;RING-type zinc-finger;zinc finger of C3HC4-type, RING;Zinc finger, C3HC4 type;Zinc finger, C3HC4 type;Ring finger domain;Zinc finger, C3HC4 type;zinc-RING finger domain	cytoplasmic
ENSP00000316649.3	OSBPL2	Oxysterol-binding protein-related protein 2	9885	pep chromosome:GRCh38:20:62238521:62296183:1 gene:ENSG00000130703.17 transcript:ENST00000313733.9 gene_biotype:protein_coding transcript_biotype:protein_coding gene_symbol:OSBPL2 description:oxysterol binding protein like 2 [Source:HGNC Symbol;Acc:HGNC:15761]	5.4395	2.4435	0.01513	up	yes	66.8425	12.2884	0.1	73.2305	0.1	0.1	0.1	0.1	17.2844	36.3217	81.4625	71.112899974726	81.994787501138	112.87865878102	BP:protein homotetramerization;BP:membrane organization;BP:plasma membrane organization;BP:small molecule metabolic process;BP:small molecule biosynthetic process;BP:cellular component organization or biogenesis;BP:macromolecular complex assembly;BP:monocarboxylic acid metabolic process;BP:oxoacid metabolic process;BP:organic acid biosynthetic process;BP:cellular component assembly;BP:sterol tran…	GO:0051289;GO:0061024;GO:0007009;GO:0044281;GO:0044283;GO:0071840;GO:0065003;GO:0032787;GO:0043436;GO:0016053;GO:0022607;GO:0015918;GO:0015850;GO:0015914;GO:0016043;GO:0006629;GO:0006810;GO:0008150;GO:0008152;GO:0051234;GO:0046907;GO:0046394;GO:0032365;GO:0006694;GO:0006699;GO:1901617;GO:1901615;GO:0006869;GO:0030301;GO:0051641;GO:0009987;GO:0008206;GO:0008202;GO:0051259;GO:0006082;GO:0072330;GO:…	K20174	OSBPL1_2, ORP1_2	------	------	ENOG410XP9E	S:Function unknown	PF01237.23	Oxysterol_BP	Oxysterol-binding protein	cytoplasmic
ENSP00000290246.6	ELMO2	Engulfment and cell motility protein 2	63916	pep chromosome:GRCh38:20:46366050:46406615:-1 gene:ENSG00000062598.18 transcript:ENST00000290246.11 gene_biotype:protein_coding transcript_biotype:protein_coding gene_symbol:ELMO2 description:engulfment and cell motility 2 [Source:HGNC Symbol;Acc:HGNC:17233]	4.8597	2.2809	0.02313	up	yes	65.1312	13.4023	79.9137	0.1	0.1	0.1	0.1	0.1	112.31774472252	45.9765	98.0676	23.8202	43.1078	67.497604991039	BP:phagocytosis;BP:cell chemotaxis;BP:cell death;BP:cellular component organization or biogenesis;BP:fibril organization;BP:cellular component organization;BP:cell migration;BP:transport;BP:chemotaxis;BP:cellular process;BP:programmed cell death;BP:biological_process;BP:establishment of localization;BP:localization;BP:locomotion;BP:actin filament organization;BP:endocytosis;BP:vesicle-mediated tr…	GO:0006909;GO:0060326;GO:0008219;GO:0071840;GO:0097435;GO:0016043;GO:0016477;GO:0006810;GO:0006935;GO:0009987;GO:0012501;GO:0008150;GO:0051234;GO:0051179;GO:0040011;GO:0007015;GO:0006897;GO:0016192;GO:0048870;GO:0042330;GO:0098657;GO:0006915GO:0016020;GO:0110165;GO:0005829;GO:0005575GO:0017124;GO:0019899;GO:0003674;GO:0005488;GO:0019900;GO:0030971;GO:1990782;GO:0019901;GO:0019904;GO:0005515;GO:00…	K18985	ELMO2, CED12A	hsa05132;hsa05131;hsa05100;hsa05135	Salmonella infection;Shigellosis;Bacterial invasion of epithelial cells;Yersinia infection	ENOG410XPKN	S:Function unknown	PF11841.14;PF04727.18;PF16457.11	ELMO_ARM;ELMO_CED12;PH_12	ELMO, armadillo-like helical domain;ELMO/CED-12 family;Pleckstrin homology domain	cytoplasmic
ENSP00000264313.5	SLAIN2	SLAIN motif-containing protein 2	57606	pep chromosome:GRCh38:4:48341529:48426201:1 gene:ENSG00000109171.15 transcript:ENST00000264313.11 gene_biotype:protein_coding transcript_biotype:protein_coding gene_symbol:SLAIN2 description:SLAIN motif family member 2 [Source:HGNC Symbol;Acc:HGNC:29282]	7.9076	2.9832	0.00012	up	yes	69.6194	8.8041	52.3247	0.1	0.1	0.1	0.1	0.1	63.372971098326	68.3748	55.8241	89.591671581632	63.016167011284	77.537035159538	BP:regulation of microtubule polymerization or depolymerization;BP:positive regulation of microtubule polymerization or depolymerization;BP:regulation of microtubule polymerization;BP:positive regulation of microtubule polymerization;BP:regulation of organelle organization;BP:regulation of fibril organization;BP:regulation of cellular component organization;BP:microtubule cytoskeleton organizatio…	GO:0031110;GO:0031112;GO:0031113;GO:0031116;GO:0033043;GO:1902903;GO:0051128;GO:0000226;GO:0032886;GO:0071840;GO:0007020;GO:0051495;GO:0051493;GO:0097435;GO:0016043;GO:0050789;GO:0065007;GO:0032271;GO:0032273;GO:0048518;GO:0051130;GO:0009987;GO:0031334;GO:0050794;GO:0008150;GO:0043254;GO:0031122;GO:0006996;GO:0007017;GO:0007010;GO:0044089;GO:1902905;GO:0010638;GO:0044087;GO:0070507;GO:0048522GO:0…	K16580	SLAIN1_2	------	------	ENOG410XPVV	S:Function unknown	PF15301.11	SLAIN	SLAIN motif-containing family	cytoplasmic
ENSP00000254695.8	RAP1GAP2	Rap1 GTPase-activating protein 2	23108	pep chromosome:GRCh38:17:2796438:3037741:1 gene:ENSG00000132359.17 transcript:ENST00000254695.13 gene_biotype:protein_coding transcript_biotype:protein_coding gene_symbol:RAP1GAP2 description:RAP1 GTPase activating protein 2 [Source:HGNC Symbol;Acc:HGNC:29176]	6.1109	2.6114	0.001648	up	yes	66.2963	10.8489	64.5934	0.1	0.1	0.1	0.1	0.1	42.1269	75.842626378625	80.449710756306	44.7561	74.064268699319	80.538067831923	BP:regulation of response to stimulus;BP:regulation of signaling;BP:regulation of cell communication;BP:regulation of biological process;BP:cellular component organization or biogenesis;BP:immune system process;BP:regulation of signal transduction;BP:cellular component organization;BP:biological regulation;BP:regulation of biological quality;BP:regulation of small GTPase mediated signal transduct…	GO:0048583;GO:0023051;GO:0010646;GO:0050789;GO:0071840;GO:0002376;GO:0009966;GO:0016043;GO:0065007;GO:0065008;GO:0051056;GO:0009987;GO:0050794;GO:0008361;GO:0008150;GO:0006955;GO:1902531;GO:0090066;GO:0002250;GO:0050896;GO:0032535GO:0005886;GO:0005737;GO:0031090;GO:0005813;GO:0016020;GO:0005815;GO:0048471;GO:0110165;GO:0031965;GO:0005829;GO:0005575GO:0003674;GO:0008047;GO:0098772;GO:0030234;GO:00…	K17708	RAP1GAP2	------	------	ENOG410XTIX	S:Function unknown	PF02145.21;PF21022.2	Rap_GAP;Rap-GAP_dimer	Rap/ran-GAP;Rap/Ran-GAP protein dimerization domain	cytoplasmic
ENSP00000265070.6	GOLPH3	Golgi phosphoprotein 3	64083	pep chromosome:GRCh38:5:32124716:32174319:-1 gene:ENSG00000113384.14 transcript:ENST00000265070.7 gene_biotype:protein_coding transcript_biotype:protein_coding gene_symbol:GOLPH3 description:golgi phosphoprotein 3 [Source:HGNC Symbol;Acc:HGNC:15452]	5.1614	2.3678	0.002647	up	yes	64.425	12.482	74.3918	0.1	0.1	0.1	0.1	0.1	56.985679975573	69.6292	52.067	57.221303553092	72.663819067792	77.9833	BP:protein localization;BP:regulation of secretion;BP:positive regulation of secretion;BP:regulation of transport;BP:positive regulation of response to stimulus;BP:regulation of response to stimulus;BP:membrane budding;BP:membrane organization;BP:maintenance of location in cell;BP:cellular component organization or biogenesis;BP:cellular macromolecule localization;BP:asymmetric Golgi ribbon forma…	GO:0008104;GO:0051046;GO:0051047;GO:0051049;GO:0048584;GO:0048583;GO:0006900;GO:0061024;GO:0051651;GO:0071840;GO:0070727;GO:0090164;GO:0009967;GO:0090161;GO:0048518;GO:0048519;GO:0033036;GO:0051050;GO:0045184;GO:0045185;GO:0072657;GO:0051668;GO:0071692;GO:0072659;GO:0016192;GO:0019538;GO:0048870;GO:0016050;GO:0022607;GO:0023051;GO:0070201;GO:0120036;GO:0051222;GO:0051223;GO:0042981;GO:0050789;GO:…	K15620	GOLPH3, GPP34	------	------	ENOG410XRT6	U:Intracellular trafficking, secretion, and vesicular transport	PF05719.16	GPP34	Golgi phosphoprotein 3	mitochondrial
ENSP00000296411.6	METAP1	Methionine aminopeptidase 1	23173	pep chromosome:GRCh38:4:98995721:99062809:1 gene:ENSG00000164024.12 transcript:ENST00000296411.11 gene_biotype:protein_coding transcript_biotype:protein_coding gene_symbol:METAP1 description:methionyl aminopeptidase 1 [Source:HGNC Symbol;Acc:HGNC:15789]	749.826	9.5504	0.003396	up	yes	74.9826	0.1	0.1	0.1	0.1	0.1	0.1	0.1	64.5739	62.3137	169.528	41.164588616861	40.4567	71.858599339179	BP:regulation of primary metabolic process;BP:regulation of metabolic process;BP:homotypic cell-cell adhesion;BP:N-terminal protein amino acid modification;BP:regulation of biological process;BP:posttranscriptional regulation of gene expression;BP:regulation of protein metabolic process;BP:peptidyl-amino acid modification;BP:cell-cell adhesion;BP:biological regulation;BP:proteolysis;BP:regulation…	GO:0080090;GO:0019222;GO:0034109;GO:0031365;GO:0050789;GO:0010608;GO:0051246;GO:0018193;GO:0098609;GO:0065007;GO:0006508;GO:0010468;GO:0060255;GO:0009889;GO:0009987;GO:0050794;GO:0043412;GO:0036211;GO:0008150;GO:0008152;GO:0007155;GO:0044238;GO:0051604;GO:0019538;GO:0018206;GO:0043170;GO:0010556;GO:0006417;GO:0070527GO:0005737;GO:0110165;GO:0005829;GO:0005575GO:0004177;GO:0004239;GO:0008238;GO:00…	K01265	map	------	------	COG0024	J:Translation, ribosomal structure and biogenesis	PF00557.29;PF15801.11	Peptidase_M24;zf-C6H2	Metallopeptidase family M24;zf-MYND-like zinc finger, mRNA-binding	cytoplasmic
ENSP00000246489.7	KLC1	Kinesin light chain 1	3831	pep chromosome:GRCh38:14:103629241:103693743:1 gene:ENSG00000126214.22 transcript:ENST00000246489.11 gene_biotype:protein_coding transcript_biotype:protein_coding gene_symbol:KLC1 description:kinesin light chain 1 [Source:HGNC Symbol;Acc:HGNC:6387]	748.963	9.5488	0.002285	up	yes	74.8963	0.1	0.1	0.1	0.1	0.1	0.1	0.1	31.5887	35.6886	155.368	68.475437963399	89.4874	68.769636303521	BP:biological_process;BP:cellular process;BP:microtubule-based movement;BP:microtubule-based processCC:cytoplasm;CC:supramolecular complex;CC:macromolecular complex;CC:polymeric cytoskeletal fiber;CC:supramolecular fiber;CC:cellular_component;CC:supramolecular polymer;CC:kinesin complex;CC:microtubule;CC:microtubule associated complex;CC:cellular anatomical entityMF:kinesin binding;MF:cytoskeleta…	GO:0008150;GO:0009987;GO:0007018;GO:0007017GO:0005737;GO:0099080;GO:0032991;GO:0099513;GO:0099512;GO:0005575;GO:0099081;GO:0005871;GO:0005874;GO:0005875;GO:0110165GO:0019894;GO:0008092;GO:0003674;GO:0005488;GO:0005515	K10407	KLC	hsa05132;hsa05020;hsa05022;hsa05014;hsa05016;hsa04814;hsa05010;hsa05012	Salmonella infection;Prion disease;Pathways of neurodegeneration - multiple diseases;Amyotrophic lateral sclerosis;Huntington disease;Motor proteins;Alzheimer disease;Parkinson disease	COG0457	J:Translation, ribosomal structure and biogenesis	PF13424.12;PF13374.12;PF24885.1;PF00515.34;PF13176.12;PF07719.23;PF13432.12;PF17874.7;PF13181.12;PF14559.12;PF12895.13	TPR_12;TPR_10;TPR_NPHP3;TPR_1;TPR_7;TPR_2;TPR_16;TPR_MalT;TPR_8;TPR_19;ANAPC3	Tetratricopeptide repeat;Tetratricopeptide repeat;Nephrocystin-3 TPR domain;Tetratricopeptide repeat;Tetratricopeptide repeat;Tetratricopeptide repeat;Tetratricopeptide repeat;MalT-like TPR region;Tetratricopeptide repeat;Tetratricopeptide repeat;Anaphase-promoting complex, cyclosome, subunit 3	cytoplasmic
ENSP00000295588.4	POGLUT1	Protein O-glucosyltransferase 1	56983	pep chromosome:GRCh38:3:119468963:119494708:1 gene:ENSG00000163389.12 transcript:ENST00000295588.9 gene_biotype:protein_coding transcript_biotype:protein_coding gene_symbol:POGLUT1 description:protein O-glucosyltransferase 1 [Source:HGNC Symbol;Acc:HGNC:22954]	4.3505	2.1212	0.00505	up	yes	60.5514	13.9182	54.0407	0.1	0.1	29.0686	0.1	0.1	23.5787	44.8051	81.3297	65.822303390559	67.962917283345	79.8096	BP:embryonic morphogenesis;BP:regulation of anatomical structure morphogenesis;BP:mesoderm development;BP:positive regulation of response to stimulus;BP:regulation of response to stimulus;BP:positive regulation of signaling;BP:peptidyl-serine modification;BP:multicellular organismal process;BP:regulation of signaling;BP:positive regulation of cell communication;BP:anatomical structure morphogenes…	GO:0048598;GO:0022603;GO:0007498;GO:0048584;GO:0048583;GO:0023056;GO:0018209;GO:0032501;GO:0023051;GO:0010647;GO:0009653;GO:0003002;GO:0007389;GO:0010646;GO:0006486;GO:0009966;GO:0009967;GO:0007369;GO:0018193;GO:0050789;GO:0045747;GO:0018242;GO:0065007;GO:0048518;GO:0048731;GO:0045995;GO:0048318;GO:0032502;GO:0035282;GO:0010470;GO:0050793;GO:0009987;GO:0070085;GO:0009888;GO:0048339;GO:0043412;GO:…	K13667	POGLUT1, RUMI, KTELC1	hsa00514	Other types of O-glycan biosynthesis	ENOG410XT5U	S:Function unknown	PF05686.18	Glyco_transf_90	Glycosyl transferase family 90	ER
ENSP00000269886.2	SH3GL1	Endophilin-A2	6455	pep chromosome:GRCh38:19:4360370:4400547:-1 gene:ENSG00000141985.9 transcript:ENST00000269886.7 gene_biotype:protein_coding transcript_biotype:protein_coding gene_symbol:SH3GL1 description:SH3 domain containing GRB2 like 1, endophilin A2 [Source:HGNC Symbol;Acc:HGNC:10830]	4.7739	2.2552	0.02837	up	yes	61.352	12.8515	76.6093	0.1	0.1	0.1	0.1	0.1	78.913490402597	41.9239	5.58263	72.606726034535	63.426067030286	105.659	BP:developmental process;BP:macromolecular complex subunit organization;BP:cellular component organization or biogenesis;BP:clathrin coat disassembly;BP:macromolecular complex disassembly;BP:protein depolymerization;BP:cellular component organization;BP:regulation of biological process;BP:biological regulation;BP:vesicle uncoating;BP:central nervous system development;BP:cellular process;BP:regul…	GO:0032502;GO:0043933;GO:0071840;GO:0072318;GO:0032984;GO:0051261;GO:0016043;GO:0050789;GO:0065007;GO:0072319;GO:0007417;GO:0009987;GO:0050794;GO:0022411;GO:0048731;GO:0016191;GO:0048856;GO:0008150;GO:0007165GO:0016020;GO:0043229;GO:0043228;GO:0045202;GO:0043226;GO:0005737;GO:0002102;GO:0031090;GO:0031901;GO:0010008;GO:0098588;GO:0110165;GO:0070161;GO:0030054;GO:0030659;GO:0012506;GO:0042995;GO:0…	K11247	SH3GL	hsa04144	Endocytosis	ENOG410XNYB	U:Intracellular trafficking, secretion, and vesicular transport	PF03114.23;PF00018.34;PF07653.23;PF14604.12;PF10455.14	BAR;SH3_1;SH3_2;SH3_9;BAR_2	BAR domain;SH3 domain;Variant SH3 domain;Variant SH3 domain;Bin/amphiphysin/Rvs domain for vesicular trafficking	cytoplasmic
ENSP00000319910.5	EIF3M	Eukaryotic translation initiation factor 3 subunit M	-	pep chromosome:GRCh38:11:32583839:32596010:1 gene:ENSG00000149100.13 transcript:ENST00000323213.9 gene_biotype:protein_coding transcript_biotype:protein_coding gene_symbol:EIF3M description:eukaryotic translation initiation factor 3 subunit M [Source:HGNC Symbol;Acc:HGNC:24460]	0.0539	-4.2136	5.846E-5	down	yes	3.7841	70.2081	44.7122	58.316431203508	56.160134526377	73.293097456687	109.14599043362	79.621039278377	0.1	0.1	0.1	0.1	22.2047	0.1	BP:cellular process;BP:biological_process;BP:metabolic process;BP:cytoplasmic translational initiation;BP:translational initiationCC:macromolecular complex;CC:eukaryotic translation initiation factor 3 complex, eIF3m;CC:cellular_component;CC:eukaryotic translation initiation factor 3 complexMF:molecular_function;MF:translation factor activity, RNA binding;MF:protein binding;MF:translation regulat…	GO:0009987;GO:0008150;GO:0008152;GO:0002183;GO:0006413GO:0032991;GO:0071541;GO:0005575;GO:0005852GO:0003674;GO:0008135;GO:0005515;GO:0045182;GO:0097159;GO:0090079;GO:0005488;GO:0031369;GO:0003676;GO:0003743	K15030	EIF3M	------	------	ENOG410XNP7	J:Translation, ribosomal structure and biogenesis	------	------	------	cytoplasmic
ENSP00000335055.5	WASF3	Actin-binding protein WASF3	10810	pep chromosome:GRCh38:13:26557683:26688948:1 gene:ENSG00000132970.14 transcript:ENST00000335327.6 gene_biotype:protein_coding transcript_biotype:protein_coding gene_symbol:WASF3 description:WASP family member 3 [Source:HGNC Symbol;Acc:HGNC:12734]	735.548	9.5227	4.789E-6	up	yes	73.5548	0.1	0.1	0.1	0.1	0.1	0.1	0.1	56.398	97.194658080102	99.298	62.503629289657	52.911785085539	73.022825351859	BP:cell development;BP:cellular component organization or biogenesis;BP:cellular developmental process;BP:positive regulation of cytoskeleton organization;BP:regulation of cytoskeleton organization;BP:positive regulation of biological process;BP:regulation of cell shape;BP:actin filament polymerization;BP:positive regulation of organelle organization;BP:regulation of cell morphogenesis;BP:cellula…	GO:0048468;GO:0071840;GO:0048869;GO:0051495;GO:0051493;GO:0048518;GO:0008360;GO:0030041;GO:0010638;GO:0022604;GO:0022607;GO:0021782;GO:0022603;GO:0120036;GO:0050789;GO:0120031;GO:0016043;GO:0065003;GO:0065007;GO:0065008;GO:0051130;GO:0050793;GO:0050794;GO:0008154;GO:0008150;GO:0051239;GO:0032956;GO:0031644;GO:0031646;GO:0031641;GO:0031643;GO:0051960;GO:0110053;GO:0097435;GO:0051127;GO:0051125;GO:…	K06083	WASF3	hsa05132;hsa04520;hsa05130;hsa05231;hsa04666	Salmonella infection;Adherens junction;Pathogenic Escherichia coli infection;Choline metabolism in cancer;Fc gamma R-mediated phagocytosis	ENOG410XRBQ	S:Function unknown	PF02205.27	WH2	WH2 motif	cytoplasmic
ENSP00000262215.3	ARFGEF1	Brefeldin A-inhibited guanine nucleotide-exchange protein 1	10565	pep chromosome:GRCh38:8:67197658:67343781:-1 gene:ENSG00000066777.9 transcript:ENST00000262215.8 gene_biotype:protein_coding transcript_biotype:protein_coding gene_symbol:ARFGEF1 description:ADP ribosylation factor guanine nucleotide exchange factor 1 [Source:HGNC Symbol;Acc:HGNC:15772]	13.3989	3.744	0.001741	up	yes	67.6871	5.0517	0.1	0.1	0.1	29.8105	0.1	0.1	16.7166	53.6886	63.7476	89.358457372685	64.4354	118.17567873301	BP:protein localization;BP:positive regulation of response to stimulus;BP:regulation of response to stimulus;BP:regulation of actin polymerization or depolymerization;BP:cellular component organization or biogenesis;BP:cellular macromolecule localization;BP:regulation of signal transduction;BP:negative regulation of cytoskeleton organization;BP:endomembrane system organization;BP:negative regulat…	GO:0008104;GO:0048584;GO:0048583;GO:0008064;GO:0071840;GO:0070727;GO:0009966;GO:0051494;GO:0010256;GO:0044092;GO:0048518;GO:0048519;GO:0033036;GO:0051056;GO:0045184;GO:0065009;GO:0016192;GO:0019538;GO:0010639;GO:0031333;GO:0032535;GO:0032940;GO:0050789;GO:0051346;GO:0006887;GO:0016043;GO:0090066;GO:0065007;GO:0032012;GO:0065008;GO:0050790;GO:0140352;GO:0006810;GO:0034260;GO:0050794;GO:0043412;GO:…	K18442	ARFGEF, BIG	hsa04144	Endocytosis	COG5307	S:Function unknown	PF01369.25;PF20252.3;PF12783.13;PF16213.11;PF09324.15	Sec7;BIG2_C;Sec7-like_HUS;DCB;Sec7-like_HDS	Sec7 domain;BIG2 C-terminal domain;Mon2/Sec7/BIG1-like, HUS domain;Mon2/Sec7/BIG1-like, dimerisation and cyclophilin-binding domain;Mon2/Sec7/BIG1-like, HDS	cytoplasmic
ENSP00000412831.2	CIRBP	Cold-inducible RNA-binding protein	1153	pep chromosome:GRCh38:19:1269332:1273172:1 gene:ENSG00000099622.14 transcript:ENST00000413636.6 gene_biotype:protein_coding transcript_biotype:protein_coding gene_symbol:CIRBP description:cold inducible RNA binding protein [Source:HGNC Symbol;Acc:HGNC:1982]	725.182	9.5022	5.254E-10	up	yes	72.5182	0.1	0.1	0.1	0.1	0.1	0.1	0.1	79.394505970026	66.114157725901	77.988552928085	61.118525787757	71.238691637291	79.254698447623	BP:regulation of primary metabolic process;BP:regulation of metabolic process;BP:positive regulation of mRNA processing;BP:regulation of mRNA processing;BP:cellular component organization or biogenesis;BP:negative regulation of macromolecule metabolic process;BP:positive regulation of macromolecule metabolic process;BP:posttranscriptional regulation of gene expression;BP:positive regulation of bi…	GO:0080090;GO:0019222;GO:0050685;GO:0050684;GO:0071840;GO:0010605;GO:0010604;GO:0010608;GO:0048518;GO:0048519;GO:0060255;GO:0061013;GO:0045727;GO:0009894;GO:0022607;GO:0009892;GO:0009893;GO:0009891;GO:0034063;GO:0050789;GO:0016043;GO:0065007;GO:0065008;GO:0009889;GO:0050794;GO:0006950;GO:0008150;GO:0048255;GO:0009266;GO:0009895;GO:0050896;GO:0010557;GO:0010556;GO:1903311;GO:1903313;GO:1903312;GO:…	K13195	CIRBP	------	------	COG0724	S:Function unknown	PF00076.28	RRM_1	RNA recognition motif	cytoplasmic
ENSP00000461416.1	-	Carbohydrate kinase FGGY N-terminal domain-containing protein	23729	pep chromosome:GRCh38:17:3585149:3636249:-1 gene:ENSG00000262304.2 transcript:ENST00000572919.1 gene_biotype:protein_coding transcript_biotype:nonsense_mediated_decay description:novel readthrough SHPK-TRPV1 protein	0.1039	-3.2667	0.002204	down	yes	6.8196	65.6595	64.620504817657	39.9818	27.4064	101.185	57.394818152463	103.368	0.1	0.1	0.1	0.1	40.4177	0.1	BP:regulation of response to stimulus;BP:small molecule metabolic process;BP:regulation of defense response;BP:cellular response to stimulus;BP:response to external biotic stimulus;BP:regulation of inflammatory response;BP:glycerol metabolic process;BP:biological regulation;BP:response to biotic stimulus;BP:response to external stimulus;BP:purine nucleotide metabolic process;BP:organophosphate me…	GO:0048583;GO:0044281;GO:0031347;GO:0051716;GO:0043207;GO:0050727;GO:0006071;GO:0065007;GO:0009607;GO:0009605;GO:0006163;GO:0019637;GO:0043030;GO:0046496;GO:0032496;GO:0050789;GO:0071353;GO:0002682;GO:0071219;GO:0071216;GO:0034097;GO:0050794;GO:0008150;GO:0051239;GO:0071345;GO:0080134;GO:0002694;GO:0006753;GO:1901615;GO:0006739;GO:0008152;GO:0032101;GO:0016310;GO:0070887;GO:0006139;GO:0006740;GO:…	K11214	SHPK	hsa00030;hsa01100	Pentose phosphate pathway;Metabolic pathways	COG0554	U:Intracellular trafficking, secretion, and vesicular transport	PF00370.27	FGGY_N	FGGY family of carbohydrate kinases, N-terminal domain	cytoplasmic
ENSP00000371061.2	RIMOC1	RAB7A-interacting MON1-CCZ1 complex subunit 1	285636	pep chromosome:GRCh38:5:41904344:41921636:1 gene:ENSG00000205765.10 transcript:ENST00000381647.7 gene_biotype:protein_coding transcript_biotype:protein_coding gene_symbol:RIMOC1 description:RAB7A interacting MON1-CCZ1 complex subunit 1 [Source:HGNC Symbol;Acc:HGNC:27750]	16.3782	4.0337	2.378E-7	up	yes	67.0786	4.0956	24.0737	0.1	0.1	0.1	0.1	0.1	60.790978841725	73.5387	77.8735	60.800733162687	59.080498847455	70.387368513997	BP:mitophagy;BP:macromitophagy;BP:cellular process;BP:macroautophagy;BP:process utilizing autophagic mechanism;BP:metabolic process;BP:biological_process;BP:catabolic process;BP:autophagyCC:cellular_component;CC:cytosol;CC:nucleoplasm;CC:cellular anatomical entity	GO:0000422;GO:0000423;GO:0009987;GO:0016236;GO:0061919;GO:0008152;GO:0008150;GO:0009056;GO:0006914GO:0005575;GO:0005829;GO:0005654;GO:0110165	------	------	------	------	ENOG4111Z9V	S:Function unknown	PF17716.6	RIMC1	RAB7A-interacting MON1-CCZ1 complex subunit 1	cytoplasmic
ENSP00000017003.2	XYLT2	Xylosyltransferase 2	64132	pep chromosome:GRCh38:17:50346126:50361185:1 gene:ENSG00000015532.10 transcript:ENST00000017003.7 gene_biotype:protein_coding transcript_biotype:protein_coding gene_symbol:XYLT2 description:xylosyltransferase 2 [Source:HGNC Symbol;Acc:HGNC:15517]	706.538	9.4646	0.0009549	up	yes	70.6538	0.1	0.1	0.1	0.1	0.1	0.1	0.1	109.371	27.1706	114.555	31.167	62.794	78.865818134059	BP:chondroitin sulfate biosynthetic process;BP:chondroitin sulfate metabolic process;BP:glycosaminoglycan metabolic process;BP:heparin metabolic process;BP:mucopolysaccharide metabolic process;BP:glycoprotein metabolic process;BP:glycoprotein biosynthetic process;BP:heparan sulfate proteoglycan biosynthetic process;BP:heparin biosynthetic process;BP:cellular process;BP:proteoglycan biosynthetic p…	GO:0030206;GO:0030204;GO:0030203;GO:0030202;GO:1903510;GO:0009100;GO:0009101;GO:0015012;GO:0030210;GO:0009987;GO:0030166;GO:0009058;GO:0009059;GO:0008150;GO:0008152;GO:0044238;GO:0044272;GO:1901137;GO:1901135;GO:0050654;GO:0043170;GO:0019538;GO:0006029;GO:0006790;GO:0006022;GO:0006023;GO:0050650;GO:0006024GO:0000139;GO:0005615;GO:0005576;GO:0110165;GO:0098588;GO:0016020;GO:0031090;GO:0005575GO:00…	K00771	XYLT	hsa00534;hsa01100;hsa00532	Glycosaminoglycan biosynthesis - heparan sulfate / heparin;Metabolic pathways;Glycosaminoglycan biosynthesis - chondroitin sulfate / dermatan sulfate	ENOG410XQ7M	S:Function unknown	PF12529.13;PF02485.27	Xylo_C;Branch	Xylosyltransferase C terminal;Core-2/I-Branching enzyme	ER
ENSP00000262306.7	ELOB	Elongin-B	6923	pep chromosome:GRCh38:16:2771414:2777277:-1 gene:ENSG00000103363.16 transcript:ENST00000262306.11 gene_biotype:protein_coding transcript_biotype:protein_coding gene_symbol:ELOB description:elongin B [Source:HGNC Symbol;Acc:HGNC:11619]	705.057	9.4616	1.924E-5	up	yes	70.5057	0.1	0.1	0.1	0.1	0.1	0.1	0.1	57.103004284474	51.9172	89.7794	95.813194469733	42.0173	86.404131698345	BP:positive regulation of proteasomal ubiquitin-dependent protein catabolic process;BP:regulation of primary metabolic process;BP:regulation of metabolic process;BP:cellular component organization or biogenesis;BP:macromolecular complex assembly;BP:negative regulation of macromolecule metabolic process;BP:regulation of proteasomal ubiquitin-dependent protein catabolic process;BP:posttranscription…	GO:0032436;GO:0080090;GO:0019222;GO:0071840;GO:0065003;GO:0010605;GO:0032434;GO:0010608;GO:0070647;GO:0032446;GO:0048518;GO:0048519;GO:0060255;GO:0006354;GO:0060147;GO:0030162;GO:0060149;GO:0019538;GO:0016567;GO:0016441;GO:0009896;GO:0009894;GO:0022607;GO:0009892;GO:0009893;GO:0009890;GO:0009891;GO:0010629;GO:0010628;GO:0050789;GO:1900369;GO:1900368;GO:0016043;GO:0065007;GO:0006367;GO:1901800;GO:…	K03873	ELOB, TCEB2	hsa04066;hsa05211;hsa05200;hsa04120;hsa05170	HIF-1 signaling pathway;Renal cell carcinoma;Pathways in cancer;Ubiquitin mediated proteolysis;Human immunodeficiency virus 1 infection	ENOG4111UGJ	K:Transcription	PF00240.29	ubiquitin	Ubiquitin family	cytoplasmic
ENSP00000489530.1	ECH1	Delta(3,5)-Delta(2,4)-dienoyl-CoA isomerase, mitochondrial	1891	pep scaffold:GRCh38:HG26_PATCH:225094:241466:-1 gene:ENSG00000282853.2 transcript:ENST00000634245.2 gene_biotype:protein_coding transcript_biotype:protein_coding gene_symbol:ECH1 description:enoyl-CoA hydratase 1 [Source:HGNC Symbol;Acc:HGNC:3149]	0.001438	-9.4417	2.711E-6	down	yes	0.1	69.5635	96.707162345144	51.4841	81.678597189298	56.216768226579	75.8471	55.447	0.1	0.1	0.1	0.1	0.1	0.1	BP:lipid oxidation;BP:fatty acid metabolic process;BP:fatty acid beta-oxidation;BP:cellular catabolic process;BP:fatty acid catabolic process;BP:small molecule metabolic process;BP:small molecule catabolic process;BP:lipid modification;BP:lipid catabolic process;BP:lipid metabolic process;BP:cellular process;BP:monocarboxylic acid metabolic process;BP:biological_process;BP:carboxylic acid metabol…	GO:0034440;GO:0006631;GO:0006635;GO:0044248;GO:0009062;GO:0044281;GO:0044282;GO:0030258;GO:0016042;GO:0006629;GO:0009987;GO:0032787;GO:0008150;GO:0019752;GO:0008152;GO:0072329;GO:0043436;GO:0019395;GO:0009056;GO:0044238;GO:0006082;GO:0046395;GO:0016054GO:0005782;GO:0031974;GO:0043229;GO:0043227;GO:0043226;GO:0070062;GO:0016020;GO:0005777;GO:0005739;GO:0031907;GO:0110165;GO:0005759;GO:1903561;GO:0…	K12663	ECH1	hsa04146	Peroxisome	ENOG410XTHX	I:Lipid transport and metabolism	PF00378.25;PF16113.10	ECH_1;ECH_2	Enoyl-CoA hydratase/isomerase;Enoyl-CoA hydratase/isomerase	peroxisomal
ENSP00000301810.7	ACAA1	3-ketoacyl-CoA thiolase, peroxisomal	30	pep chromosome:GRCh38:3:38122710:38137242:-1 gene:ENSG00000060971.19 transcript:ENST00000301810.11 gene_biotype:protein_coding transcript_biotype:protein_coding gene_symbol:ACAA1 description:acetyl-CoA acyltransferase 1 [Source:HGNC Symbol;Acc:HGNC:82]	681.853	9.4133	1.825E-7	up	yes	68.1853	0.1	0.1	0.1	0.1	0.1	0.1	0.1	59.7698	65.277553300757	75.2049	47.6798	83.5244	77.655675876632	BP:lipid oxidation;BP:fatty acid metabolic process;BP:benzene-containing compound metabolic process;BP:fatty acid beta-oxidation;BP:very long-chain fatty acid metabolic process;BP:carboxylic acid metabolic process;BP:cellular catabolic process;BP:oxoacid metabolic process;BP:small molecule metabolic process;BP:small molecule catabolic process;BP:xenobiotic catabolic process;BP:alpha-linolenic aci…	GO:0034440;GO:0006631;GO:0042537;GO:0006635;GO:0000038;GO:0019752;GO:0044248;GO:0043436;GO:0044281;GO:0044282;GO:0042178;GO:0036109;GO:0030258;GO:0016042;GO:0033540;GO:0006629;GO:0009987;GO:0032787;GO:0008150;GO:0008152;GO:0072329;GO:0001676;GO:0019395;GO:0008206;GO:0009056;GO:0008202;GO:0044238;GO:0006805;GO:0006082;GO:0009062;GO:0016054;GO:0046395;GO:0010124;GO:0033559;GO:1901615GO:0005782;GO:0…	K07513	ACAA1	hsa00592;hsa03320;hsa01100;hsa00071;hsa00280;hsa04146;hsa01212;hsa01040	alpha-Linolenic acid metabolism;PPAR signaling pathway;Metabolic pathways;Fatty acid degradation;Valine, leucine and isoleucine degradation;Peroxisome;Fatty acid metabolism;Biosynthesis of unsaturated fatty acids	COG0183	S:Function unknown	PF00108.29;PF02803.24	Thiolase_N;Thiolase_C	Thiolase, N-terminal domain;Thiolase, C-terminal domain	mitochondrial
ENSP00000392873.2	PRRC1	Protein PRRC1	133619	pep chromosome:GRCh38:5:127517651:127552151:1 gene:ENSG00000164244.22 transcript:ENST00000442138.6 gene_biotype:protein_coding transcript_biotype:protein_coding gene_symbol:PRRC1 description:proline rich coiled-coil 1 [Source:HGNC Symbol;Acc:HGNC:28164]	7.582	2.9226	0.01845	up	yes	60.1789	7.9371	0.1	0.1	0.1	0.1	0.1	47.1226	26.2422	5.70829	42.6308	94.479831384994	82.7784	109.234	CC:cytoplasm;CC:Golgi apparatus;CC:intracellular membrane-bounded organelle;CC:cellular_component;CC:intracellular organelle;CC:membrane-bounded organelle;CC:organelle;CC:cellular anatomical entityMF:protein kinase A binding;MF:molecular_function;MF:protein kinase A regulatory subunit binding;MF:protein binding;MF:binding	GO:0005737;GO:0005794;GO:0043231;GO:0005575;GO:0043229;GO:0043227;GO:0043226;GO:0110165GO:0051018;GO:0003674;GO:0034237;GO:0005515;GO:0005488	------	------	------	------	ENOG410ZN4R	S:Function unknown	PF01931.24	NTPase_I-T	Protein of unknown function DUF84	cytoplasmic
ENSP00000181796.2	FAM107B	Protein FAM107B	83641	pep chromosome:GRCh38:10:14518557:14774897:-1 gene:ENSG00000065809.14 transcript:ENST00000181796.7 gene_biotype:protein_coding transcript_biotype:protein_coding gene_symbol:FAM107B description:family with sequence similarity 107 member B [Source:HGNC Symbol;Acc:HGNC:23726]	4.4392	2.1503	0.03078	up	yes	53.7423	12.1062	0.1	0.1	72.1373	0.1	0.1	0.1	54.407313554538	74.704431620744	29.2206	10.9796	75.586625790012	77.5554	------	------	------	------	------	------	ENOG4111QFW	S:Function unknown	PF06625.16	DUF1151	Protein of unknown function	cytoplasmic
ENSP00000360683.3	PTPN1	Tyrosine-protein phosphatase non-receptor type 1	5770	pep chromosome:GRCh38:20:50510383:50585241:1 gene:ENSG00000196396.10 transcript:ENST00000371621.5 gene_biotype:protein_coding transcript_biotype:protein_coding gene_symbol:PTPN1 description:protein tyrosine phosphatase non-receptor type 1 [Source:HGNC Symbol;Acc:HGNC:9642]	12.3804	3.63	1.602E-6	up	yes	59.6329	4.8167	0.1	0.1	0.1	28.4003	0.1	0.1	51.2047	69.6684	57.0991	55.740029146481	58.1326	65.9524	BP:negative regulation of apoptotic signaling pathway;BP:regulation of intracellular protein transport;BP:negative regulation of transferase activity;BP:regulation of phosphate metabolic process;BP:regulation of metabolic process;BP:regulation of apoptotic signaling pathway;BP:regulation of transport;BP:regulation of intracellular transport;BP:positive regulation of response to stimulus;BP:regula…	GO:2001234;GO:0033157;GO:0051348;GO:0019220;GO:0019222;GO:2001233;GO:0051049;GO:0032386;GO:0048584;GO:0048583;GO:0060759;GO:0007166;GO:0007167;GO:0007169;GO:1903573;GO:0071840;GO:0080090;GO:0051716;GO:0006986;GO:0010605;GO:0010604;GO:0009968;GO:0009966;GO:0009967;GO:0044093;GO:0006470;GO:0048518;GO:0048519;GO:0048585;GO:0060255;GO:0045859;GO:0034620;GO:0043406;GO:2000644;GO:0042325;GO:0023056;GO:…	K05696	PTPN1, PTP1B	hsa04910;hsa04520;hsa04931;hsa05208	Insulin signaling pathway;Adherens junction;Insulin resistance;Chemical carcinogenesis - reactive oxygen species	COG5599	C:Energy production and conversion	PF00102.32	Y_phosphatase	Protein-tyrosine phosphatase	cytoplasmic
ENSP00000349862.1	APAF1	Apoptotic protease-activating factor 1	317	pep chromosome:GRCh38:12:98645300:98735426:1 gene:ENSG00000120868.15 transcript:ENST00000357310.5 gene_biotype:protein_coding transcript_biotype:protein_coding gene_symbol:APAF1 description:apoptotic peptidase activating factor 1 [Source:HGNC Symbol;Acc:HGNC:576]	626.876	9.292	0.0005605	up	yes	62.6876	0.1	0.1	0.1	0.1	0.1	0.1	0.1	48.9375	23.3178	36.1749	85.404800546346	100.56	81.730262594453	BP:positive regulation of apoptotic signaling pathway;BP:regulation of primary metabolic process;BP:regulation of metabolic process;BP:regulation of apoptotic signaling pathway;BP:positive regulation of response to stimulus;BP:regulation of response to stimulus;BP:signal transduction;BP:cellular response to stimulus;BP:response to DNA damage checkpoint signaling;BP:regulation of signal transducti…	GO:2001235;GO:0080090;GO:0019222;GO:2001233;GO:0048584;GO:0048583;GO:0007165;GO:0051716;GO:0072423;GO:0009966;GO:0009967;GO:0001822;GO:0048513;GO:0048518;GO:0051052;GO:0060255;GO:0009607;GO:0072414;GO:0031667;GO:0071559;GO:0033554;GO:0009894;GO:0072402;GO:0035556;GO:0042981;GO:0050789;GO:0001666;GO:0065007;GO:0071216;GO:0001843;GO:0009719;GO:0050794;GO:0060606;GO:0012501;GO:0006950;GO:0008150;GO:…	K02084	APAF1	hsa04215;hsa05012;hsa05134;hsa05169;hsa05160;hsa05022;hsa01524;hsa05200;hsa04115;hsa05014;hsa05168;hsa05222;hsa05152;hsa05164;hsa04210;hsa05016;hsa05417;hsa05010;hsa05161;hsa05162;hsa05020	Apoptosis - multiple species;Parkinson disease;Legionellosis;Epstein-Barr virus infection;Hepatitis C;Pathways of neurodegeneration - multiple diseases;Platinum drug resistance;Pathways in cancer;p53 signaling pathway;Amyotrophic lateral sclerosis;Herpes simplex virus 1 infection;Small cell lung cancer;Tuberculosis;Influenza A;Apoptosis;Huntington disease;Lipid and atherosclerosis;Alzheimer disea…	ENOG410XP3K;COG2319	S:Function unknown;	PF00400.38;PF24814.1;PF00931.28;PF24817.1;PF17908.6;PF24807.1;PF23414.1;PF24805.1;PF25047.1;PF24796.1;PF24782.1;PF21296.3;PF24105.1;PF23393.2;PF12894.13;PF23409.1;PF23869.1;PF23381.1;PF00619.27;PF23342.1;PF20426.4;PF23775.1;PF23609.1;PF23411.1;PF23389.1;PF24780.1;PF23756.1;PF24017.1;PF23383.1;PF24797.1;PF23752.1;PF16739.11;PF23419.1	WD40;WD40_Prp19;NB-ARC;WD40_WDHD1_1st;APAF1_C;WD40_CDC20-Fz;Beta-prop_EML_2;EIF3I;Beta-prop_TEP1_2nd;WDR55;WD40_MABP1-WDR62_2nd;APAF-1-like_WHD;Beta-prop_CAF1B_HIR1;Beta-prop_WDR90_POC16_2nd;ANAPC4_WD40;Beta-prop_EML;Beta-prop_WDR75_1st;Beta-prop_IFT122_1st;CARD;WDR90_beta-prop_4th;NBCH_WD40;Beta-prop_RIG_2nd;Beta-prop_EIPR1;Beta-prop_Vps41;Beta-prop_WDR19_1st;WD40_MABP1-WDR62_1st;Beta-prop_HPS5;…	WD domain, G-beta repeat;Prp19 WD40 domain;NB-ARC domain;WDHD1 first WD40 domain;APAF-1 helical domain;CDC20/Fizzy WD40 domain;Echinoderm microtubule-associated protein second beta-propeller;EIF3I;TEP-1 second beta-propeller;WDR55;MABP1/WDR62 second WD40 domain;Apoptotic protease-activating factor 1-like, winged-helix domain;CAF1B/HIR1 beta-propeller domain;WDR90/POC16, second beta-propeller;Anap…	cytoplasmic
ENSP00000253794.1	VPS25	Vacuolar protein-sorting-associated protein 25	84313	pep chromosome:GRCh38:17:42773449:42779599:1 gene:ENSG00000131475.7 transcript:ENST00000253794.7 gene_biotype:protein_coding transcript_biotype:protein_coding gene_symbol:VPS25 description:vacuolar protein sorting 25 homolog [Source:HGNC Symbol;Acc:HGNC:28122]	623.388	9.284	8.172E-11	up	yes	62.3388	0.1	0.1	0.1	0.1	0.1	0.1	0.1	63.341484032113	62.3576	56.525	60.447846927197	59.018725356286	72.342408852807	BP:late endosome to vacuole transport via multivesicular body sorting pathway;BP:protein localization;BP:establishment of protein localization to vacuole;BP:protein localization to vacuole;BP:cellular macromolecule localization;BP:intracellular protein transport;BP:nitrogen compound transport;BP:multivesicular body sorting pathway;BP:endosome transport via multivesicular body sorting pathway;BP:m…	GO:0032511;GO:0008104;GO:0072666;GO:0072665;GO:0070727;GO:0006886;GO:0071705;GO:0071985;GO:0032509;GO:0033036;GO:0043328;GO:0006810;GO:0072594;GO:0009987;GO:0045184;GO:0033365;GO:0008150;GO:0007034;GO:0051649;GO:0051234;GO:0051179;GO:0051641;GO:0016197;GO:0046907;GO:0015031;GO:0045324;GO:0016192GO:0043229;GO:0043227;GO:0043226;GO:0036452;GO:0032991;GO:0043231;GO:0000814;GO:0005829;GO:0005575;GO:0…	K12189	VPS25, EAP20	hsa04144	Endocytosis	ENOG4111F6Y	U:Intracellular trafficking, secretion, and vesicular transport	PF05871.18	ESCRT-II	ESCRT-II complex subunit	nuclear
ENSP00000085079.6	EPN1	Epsin-1	29924	pep chromosome:GRCh38:19:55675245:55695766:1 gene:ENSG00000063245.15 transcript:ENST00000085079.11 gene_biotype:protein_coding transcript_biotype:protein_coding gene_symbol:EPN1 description:epsin 1 [Source:HGNC Symbol;Acc:HGNC:21604]	12.1792	3.6063	1.758E-5	up	yes	56.7635	4.6607	27.4643	0.1	0.1	0.1	0.1	0.1	52.347826076362	33.946	61.256941247921	62.195407304058	61.448335734774	69.3863	BP:negative regulation of blood vessel morphogenesis;BP:cell surface receptor signaling pathway;BP:regulation of anatomical structure morphogenesis;BP:embryonic organ development;BP:signal transduction;BP:embryo development;BP:regulation of vasculature development;BP:embryo development ending in birth or egg hatching;BP:regulation of sprouting angiogenesis;BP:negative regulation of sprouting angi…	GO:2000181;GO:0007166;GO:0022603;GO:0048568;GO:0007165;GO:0009790;GO:1901342;GO:0009792;GO:1903670;GO:1903671;GO:0007275;GO:0001701;GO:0051241;GO:0045765;GO:0050789;GO:0048513;GO:0065007;GO:0006810;GO:0048519;GO:0043009;GO:0032502;GO:0032501;GO:0050793;GO:0009987;GO:0050794;GO:0022414;GO:0007219;GO:0008150;GO:0051239;GO:0051234;GO:0051179;GO:0051093;GO:0044703;GO:0006897;GO:0016192;GO:0044706;GO:…	K12471	EPN	hsa04144	Endocytosis	ENOG410XSM0	U:Intracellular trafficking, secretion, and vesicular transport	PF01417.26	ENTH	ENTH domain	cytoplasmic
ENSP00000347184.5	HTT	Huntingtin	3064	pep chromosome:GRCh38:4:3074681:3243957:1 gene:ENSG00000197386.14 transcript:ENST00000355072.11 gene_biotype:protein_coding transcript_biotype:protein_coding gene_symbol:HTT description:huntingtin [Source:HGNC Symbol;Acc:HGNC:4851]	607.315	9.2463	0.0006184	up	yes	60.7315	0.1	0.1	0.1	0.1	0.1	0.1	0.1	52.590038301489	71.9264	78.4908	6.15249	61.370910316447	93.858317498145	BP:negative regulation of apoptotic signaling pathway;BP:regulation of extrinsic apoptotic signaling pathway;BP:negative regulation of extrinsic apoptotic signaling pathway;BP:regulation of phosphate metabolic process;BP:regulation of metabolic process;BP:regulation of apoptotic signaling pathway;BP:regulation of transport;BP:negative regulation of response to stimulus;BP:regulation of lipophagy;…	GO:2001234;GO:2001236;GO:2001237;GO:0019220;GO:0019222;GO:2001233;GO:0051049;GO:0048585;GO:1904502;GO:0048583;GO:1904504;GO:0007610;GO:0007611;GO:0060491;GO:0034764;GO:0034765;GO:0051656;GO:0051650;GO:0051282;GO:0080090;GO:0009968;GO:0009966;GO:0009967;GO:0071840;GO:0044093;GO:0048518;GO:0048519;GO:0016192;GO:0099111;GO:1902017;GO:0060255;GO:0007612;GO:0045859;GO:0031587;GO:0031585;GO:1905289;GO:…	K04533	HD	hsa05016;hsa05022	Huntington disease;Pathways of neurodegeneration - multiple diseases	ENOG410XSEC	U:Intracellular trafficking, secretion, and vesicular transport	PF20927.3;PF12372.14;PF20925.3;PF20926.3;PF02985.28	Htt_C-HEAT;Htt_N-HEAT;Htt_bridge;Htt_N-HEAT_1;HEAT	Huntingtin, C-terminal HEAT;Huntingtin, N-terminal HEAT;Huntingtin, bridge;Huntingtin, N-terminal HEAT 1;HEAT repeat	cytoplasmic
ENSP00000356263.3	ARMT1	Damage-control phosphatase ARMT1	79624	pep chromosome:GRCh38:6:151452466:151470101:1 gene:ENSG00000146476.11 transcript:ENST00000367294.4 gene_biotype:protein_coding transcript_biotype:protein_coding gene_symbol:ARMT1 description:acidic residue methyltransferase 1 [Source:HGNC Symbol;Acc:HGNC:17872]	0.1443	-2.7929	0.0005772	down	yes	7.4686	51.7643	47.708617859177	24.9095	50.194461872295	46.9844	75.511192130833	65.277669220511	33.1562	0.1	0.1	0.1	11.2554	0.1	BP:cellular response to stimulus;BP:methylation;BP:cellular response to stress;BP:cellular process;BP:cellular response to DNA damage stimulus;BP:response to stress;BP:biological_process;BP:metabolic process;BP:response to stimulusCC:intracellular organelle;CC:membrane-bounded organelle;CC:organelle;CC:nucleus;CC:cellular anatomical entity;CC:intracellular membrane-bounded organelle;CC:cellular_c…	GO:0051716;GO:0032259;GO:0033554;GO:0009987;GO:0006974;GO:0006950;GO:0008150;GO:0008152;GO:0050896GO:0043229;GO:0043227;GO:0043226;GO:0005634;GO:0110165;GO:0043231;GO:0005575GO:0016791;GO:0019899;GO:0042578;GO:0008276;GO:0003674;GO:0005488;GO:0051998;GO:0008168;GO:0043169;GO:0043167;GO:0016740;GO:0016741;GO:0097023;GO:0103026;GO:0016787;GO:0008757;GO:0140096;GO:0016788;GO:0003824;GO:0008171;GO:00…	K23114	ARMT1	------	------	ENOG410XPAF	S:Function unknown	PF01937.24	ARMT1-like_dom	Damage-control phosphatase ARMT1-like domain	cytoplasmic
ENSP00000353284.4	DDX3Y	ATP-dependent RNA helicase DDX3Y	8653	pep chromosome:GRCh38:Y:12904108:12918539:1 gene:ENSG00000067048.17 transcript:ENST00000360160.8 gene_biotype:protein_coding transcript_biotype:protein_coding gene_symbol:DDX3Y description:DEAD-box helicase 3 Y-linked [Source:HGNC Symbol;Acc:HGNC:2699]	588.573	9.2011	0.0001418	up	yes	58.8573	0.1	0.1	0.1	0.1	0.1	0.1	0.1	76.026730302212	58.0774	65.706241719255	73.943	68.193210952753	11.1975	BP:regulation of metabolic process;BP:cell differentiation;BP:negative regulation of gene expression;BP:negative regulation of metabolic process;BP:gamete generation;BP:negative regulation of biosynthetic process;BP:cellular developmental process;BP:regulation of biological process;BP:biological regulation;BP:negative regulation of biological process;BP:regulation of gene expression;BP:developmen…	GO:0019222;GO:0030154;GO:0010629;GO:0009892;GO:0007276;GO:0009890;GO:0048869;GO:0050789;GO:0065007;GO:0048519;GO:0010468;GO:0032502;GO:0048609;GO:0060255;GO:0009987;GO:0009889;GO:0050794;GO:0008150;GO:0010605;GO:0022414;GO:0010556;GO:0010558;GO:0048523GO:0035770;GO:0043228;GO:0036464;GO:0043227;GO:0043226;GO:0005575;GO:0043186;GO:0005634;GO:0016020;GO:0005654;GO:0110165;GO:0043231;GO:0043232;GO:0…	K17642	DDX3Y	------	------	ENOG410XNTI	L:Replication, recombination and repair	PF00270.35;PF00271.37	DEAD;Helicase_C	DEAD/DEAH box helicase;Helicase conserved C-terminal domain	cytoplasmic
ENSP00000509266.1	MTM1	Myotubularin	4534	pep chromosome:GRCh38:X:150568417:150673130:1 gene:ENSG00000171100.16 transcript:ENST00000685944.1 gene_biotype:protein_coding transcript_biotype:protein_coding gene_symbol:MTM1 description:myotubularin 1 [Source:HGNC Symbol;Acc:HGNC:7448]	21.5503	4.4296	0.00459	up	yes	55.7723	2.588	15.0277	0.1	0.1	0.1	0.1	0.1	14.7842	87.8449	89.0023	39.764934542676	18.9088	84.328455702844	BP:autophagosome assembly;BP:protein localization;BP:regulation of primary metabolic process;BP:regulation of metabolic process;BP:negative regulation of proteasomal ubiquitin-dependent protein catabolic process;BP:protein dephosphorylation;BP:negative regulation of response to stimulus;BP:regulation of response to stimulus;BP:negative regulation of protein kinase B signaling;BP:signal transducti…	GO:0000045;GO:0008104;GO:0080090;GO:0019222;GO:0032435;GO:0006470;GO:0048585;GO:0048583;GO:0051898;GO:0007165;GO:0051896;GO:0007005;GO:0010605;GO:0032434;GO:0009968;GO:0070727;GO:0009966;GO:1905037;GO:0048631;GO:1901799;GO:0048518;GO:0048519;GO:0033036;GO:0046856;GO:0019725;GO:0016202;GO:0022607;GO:0060255;GO:0045184;GO:0030162;GO:0030163;GO:0046486;GO:0016192;GO:0023057;GO:0019538;GO:0010639;GO:…	K01108	MTM1	hsa00562;hsa01100;hsa04070	Inositol phosphate metabolism;Metabolic pathways;Phosphatidylinositol signaling system	ENOG410XPTU	S:Function unknown	PF06602.19;PF02893.26	Myotub-related;GRAM	Myotubularin-like phosphatase domain;GRAM domain	cytoplasmic
ENSP00000256858.5	RELCH	RAB11-binding protein RELCH	57614	pep chromosome:GRCh38:18:62187258:62307112:1 gene:ENSG00000134444.15 transcript:ENST00000256858.10 gene_biotype:protein_coding transcript_biotype:protein_coding gene_symbol:RELCH description:RAB11 binding and LisH domain, coiled-coil and HEAT repeat containing [Source:HGNC Symbol;Acc:HGNC:29289]	571.632	9.1589	0.003417	up	yes	57.1632	0.1	0.1	0.1	0.1	0.1	0.1	0.1	56.653087992913	17.515	49.6042	116.536	23.9548	78.716528764906	BP:sterol transport;BP:lipid transport;BP:cholesterol transport;BP:organic hydroxy compound transport;BP:cellular process;BP:transport;BP:biological_process;BP:establishment of localization in cell;BP:establishment of localization;BP:localization;BP:cellular localization;BP:intracellular transport;BP:intracellular sterol transport;BP:intracellular cholesterol transport;BP:intracellular lipid tran…	GO:0015918;GO:0006869;GO:0030301;GO:0015850;GO:0009987;GO:0006810;GO:0008150;GO:0051649;GO:0051234;GO:0051179;GO:0051641;GO:0046907;GO:0032366;GO:0032367;GO:0032365GO:0005802;GO:0055037;GO:0043229;GO:0043227;GO:0043226;GO:0031984;GO:0031982;GO:0031410;GO:0110165;GO:0097708;GO:0043231;GO:0005575;GO:0098791;GO:0005768	K26154	RELCH	------	------	ENOG410Y5MU;ENOG410XQVI	S:Function unknown;	PF02985.28;PF13646.12	HEAT;HEAT_2	HEAT repeat;HEAT repeats	cytoplasmic
ENSP00000312059.7	AGFG1	Arf-GAP domain and FG repeat-containing protein 1	3267	pep chromosome:GRCh38:2:227472156:227561217:1 gene:ENSG00000173744.18 transcript:ENST00000310078.13 gene_biotype:protein_coding transcript_biotype:protein_coding gene_symbol:AGFG1 description:ArfGAP with FG repeats 1 [Source:HGNC Symbol;Acc:HGNC:5175]	563.57	9.1385	7.707E-5	up	yes	56.357	0.1	0.1	0.1	0.1	0.1	0.1	0.1	27.5581	53.4694	83.127093272877	40.0211	55.541325685881	78.425214406583	BP:nucleobase-containing compound transport;BP:nuclear transport;BP:cellular component assembly;BP:establishment of localization;BP:mRNA export from nucleus;BP:establishment of localization in cell;BP:cellular component assembly involved in morphogenesis;BP:nuclear export;BP:mRNA transport;BP:cellular component organization or biogenesis;BP:reproductive process;BP:organelle assembly;BP:establishm…	GO:0015931;GO:0051169;GO:0022607;GO:0051234;GO:0006406;GO:0051649;GO:0010927;GO:0051168;GO:0051028;GO:0071840;GO:0022414;GO:0070925;GO:0051236;GO:0097435;GO:0051641;GO:0016043;GO:0071705;GO:0006405;GO:0032502;GO:0006810;GO:0048609;GO:0009987;GO:0006913;GO:0008150;GO:0022412;GO:0007289;GO:0001675;GO:0051179;GO:0006996;GO:0006997;GO:0050658;GO:0007010;GO:0045109;GO:0046907;GO:0003006;GO:0045104;GO:…	K15044	AGFG1	------	------	COG5347;ENOG4111FWA	U:Intracellular trafficking, secretion, and vesicular transport;	PF01412.23	ArfGap	Putative GTPase activating protein for Arf	cytoplasmic
ENSP00000263904.4	STAM2	Signal transducing adapter molecule 2	10254	pep chromosome:GRCh38:2:152116801:152175763:-1 gene:ENSG00000115145.10 transcript:ENST00000263904.5 gene_biotype:protein_coding transcript_biotype:protein_coding gene_symbol:STAM2 description:signal transducing adaptor molecule 2 [Source:HGNC Symbol;Acc:HGNC:11358]	535.884	9.0658	1.231E-6	up	yes	53.5884	0.1	0.1	0.1	0.1	0.1	0.1	0.1	44.723	42.9488	58.640005777002	46.110725956123	52.344779829057	76.762908195619	BP:late endosome to vacuole transport via multivesicular body sorting pathway;BP:cellular component assembly;BP:metabolic process;BP:macroautophagy;BP:establishment of protein localization to vacuole;BP:protein localization to vacuole;BP:protein localization;BP:membrane organization;BP:nitrogen compound transport;BP:cellular localization;BP:cellular component organization or biogenesis;BP:membran…	GO:0032511;GO:0022607;GO:0008152;GO:0016236;GO:0072666;GO:0072665;GO:0008104;GO:0061024;GO:0071705;GO:0051641;GO:0071840;GO:0090148;GO:0051234;GO:0070727;GO:0006886;GO:0016043;GO:0050789;GO:0045324;GO:0065007;GO:0006810;GO:0072594;GO:0032509;GO:0033036;GO:0006914;GO:0007032;GO:0071985;GO:0036258;GO:0036257;GO:0009987;GO:0050794;GO:0045184;GO:0008150;GO:0051649;GO:0070925;GO:0009056;GO:0051179;GO:…	K04705	STAM	hsa04144;hsa04630	Endocytosis;JAK-STAT signaling pathway	ENOG410XTSY	U:Intracellular trafficking, secretion, and vesicular transport	PF00790.25;PF00018.34;PF14604.12;PF07653.23	VHS;SH3_1;SH3_9;SH3_2	VHS domain;SH3 domain;Variant SH3 domain;Variant SH3 domain	cytoplasmic
ENSP00000313391.6	DAB2	Disabled homolog 2	1601	pep chromosome:GRCh38:5:39371677:39424980:-1 gene:ENSG00000153071.15 transcript:ENST00000320816.11 gene_biotype:protein_coding transcript_biotype:protein_coding gene_symbol:DAB2 description:DAB adaptor protein 2 [Source:HGNC Symbol;Acc:HGNC:2662]	10.2362	3.3556	0.001177	up	yes	48.6608	4.7538	0.1	28.0228	0.1	0.1	0.1	0.1	7.20663	53.4253	57.6065	50.772028494919	55.312529905952	67.641734394118	BP:regulation of MAPK cascade;BP:protein localization;BP:positive regulation of proteasomal ubiquitin-dependent protein catabolic process;BP:regulation of primary metabolic process;BP:regulation of metabolic process;BP:positive regulation of secretion;BP:regulation of transport;BP:negative regulation of response to stimulus;BP:positive regulation of response to stimulus;BP:regulation of response …	GO:0043408;GO:0008104;GO:0032436;GO:0080090;GO:0019222;GO:0051047;GO:0051049;GO:0048585;GO:0048584;GO:0048583;GO:0050680;GO:0090092;GO:0030111;GO:0045893;GO:0007165;GO:0007166;GO:0007167;GO:2000831;GO:0032388;GO:0048260;GO:2000058;GO:0031345;GO:0031344;GO:0033036;GO:0010605;GO:0032434;GO:0009968;GO:0045785;GO:0009966;GO:0048869;GO:0070849;GO:0070848;GO:0016192;GO:0043066;GO:0045834;GO:0032370;GO:…	K12475	DAB2	hsa04144	Endocytosis	ENOG410XZ1H	U:Intracellular trafficking, secretion, and vesicular transport	PF21792.3;PF00640.29	DAB2_SBM;PID	Disabled homolog 2-like, sulfatide-binding motifs;Phosphotyrosine interaction domain	cytoplasmic
ENSP00000054666.6	VAMP3	Vesicle-associated membrane protein 3	9341	pep chromosome:GRCh38:1:7771296:7781432:1 gene:ENSG00000049245.13 transcript:ENST00000054666.11 gene_biotype:protein_coding transcript_biotype:protein_coding gene_symbol:VAMP3 description:vesicle associated membrane protein 3 [Source:HGNC Symbol;Acc:HGNC:12644]	528.593	9.046	4.558E-6	up	yes	52.8593	0.1	0.1	0.1	0.1	0.1	0.1	0.1	63.248357564979	41.8971	30.7575	58.643570236811	52.341	70.268476955065	BP:protein localization;BP:regulation of secretion;BP:substrate adhesion-dependent cell spreading;BP:negative regulation of secretion;BP:vesicle docking involved in exocytosis;BP:vesicle fusion;BP:membrane fusion;BP:membrane organization;BP:cellular component organization or biogenesis;BP:cellular macromolecule localization;BP:regulation of transport;BP:positive regulation of biological process;B…	GO:0008104;GO:0051046;GO:0034446;GO:0051048;GO:0006904;GO:0006906;GO:0061025;GO:0061024;GO:0071840;GO:0070727;GO:0051049;GO:0048518;GO:0048519;GO:0033036;GO:0031589;GO:0051051;GO:0060255;GO:0045184;GO:0048278;GO:0072657;GO:0051668;GO:0072659;GO:0016197;GO:0016192;GO:0090174;GO:0016050;GO:0001919;GO:0022607;GO:0009893;GO:0006887;GO:0016043;GO:0045055;GO:0065003;GO:0065007;GO:0034097;GO:0140352;GO:…	K13505	VAMP3	hsa04130;hsa04145	SNARE interactions in vesicular transport;Phagosome	COG5143	O:Posttranslational modification, protein turnover, chaperones	PF00957.27	Synaptobrevin	Synaptobrevin	plasma membrane
ENSP00000343701.6	KPNA1	Importin subunit alpha-5	3836	pep chromosome:GRCh38:3:122421902:122514939:-1 gene:ENSG00000114030.13 transcript:ENST00000344337.11 gene_biotype:protein_coding transcript_biotype:protein_coding gene_symbol:KPNA1 description:karyopherin subunit alpha 1 [Source:HGNC Symbol;Acc:HGNC:6394]	522.438	9.0291	0.002654	up	yes	52.2438	0.1	0.1	0.1	0.1	0.1	0.1	0.1	20.5796	9.98983	47.572874917576	75.380413276084	67.738913638781	92.201042568147	BP:protein localization to nucleus;BP:nuclear transport;BP:protein localization;BP:regulation of primary metabolic process;BP:regulation of metabolic process;BP:regulation of response to stimulus;BP:multicellular organismal process;BP:regulation of signaling;BP:regulation of apoptotic process;BP:regulation of biological process;BP:regulation of DNA metabolic process;BP:establishment of localizati…	GO:0034504;GO:0051169;GO:0008104;GO:0080090;GO:0019222;GO:0048583;GO:0032501;GO:0023051;GO:0042981;GO:0050789;GO:0051052;GO:0051234;GO:0070727;GO:0009966;GO:0006886;GO:0098926;GO:0071705;GO:0060255;GO:0043067;GO:0065007;GO:0006810;GO:0099527;GO:0033036;GO:0014719;GO:0014901;GO:0019219;GO:0072594;GO:0060828;GO:0009987;GO:0006606;GO:0006913;GO:0030111;GO:0006607;GO:0045184;GO:0033365;GO:0001775;GO:…	K23940	KPNA1	hsa05164;hsa05132;hsa05207;hsa03013	Influenza A;Salmonella infection;Chemical carcinogenesis - receptor activation;Nucleocytoplasmic transport	COG5064	U:Intracellular trafficking, secretion, and vesicular transport	PF00514.29;PF01749.26;PF16186.11;PF24768.1;PF13513.12;PF13646.12;PF02985.28	Arm;IBB;Arm_3;ARM_ARMC5;HEAT_EZ;HEAT_2;HEAT	Armadillo/beta-catenin-like repeat;Importin beta binding domain;Atypical Arm repeat;ARMC5;HEAT-like repeat;HEAT repeats;HEAT repeat	cytoplasmic
ENSP00000263262.9	BAX	Apoptosis regulator BAX	581	pep chromosome:GRCh38:19:48954875:48961798:1 gene:ENSG00000087088.21 transcript:ENST00000345358.12 gene_biotype:protein_coding transcript_biotype:protein_coding gene_symbol:BAX description:BCL2 associated X, apoptosis regulator [Source:HGNC Symbol;Acc:HGNC:959]	14.7405	3.8817	0.003286	up	yes	47.7372	3.2385	0.1	18.931	0.1	0.1	0.1	0.1	52.2465	79.806260262499	23.2251	37.8624	15.0822	78.200576873357	BP:regulation of signaling;BP:apoptotic signaling pathway;BP:extrinsic apoptotic signaling pathway;BP:extrinsic apoptotic signaling pathway in absence of ligand;BP:intrinsic apoptotic signaling pathway;BP:signal transduction;BP:cell surface receptor signaling pathway;BP:intracellular signal transduction;BP:cell death;BP:regulation of apoptotic process;BP:regulation of biological process;BP:cellul…	GO:0023051;GO:0097190;GO:0097191;GO:0097192;GO:0097193;GO:0007165;GO:0007166;GO:0035556;GO:0008219;GO:0042981;GO:0050789;GO:0071840;GO:0051716;GO:0010646;GO:0016043;GO:0043065;GO:0043067;GO:0065007;GO:0007005;GO:0048518;GO:0048284;GO:0043068;GO:0006996;GO:0006915;GO:0038034;GO:0006919;GO:0009987;GO:2001233;GO:0048583;GO:0050794;GO:0006974;GO:0012501;GO:0006950;GO:0008150;GO:0008635;GO:0008637;GO:…	K02159	BAX	hsa05132;hsa05131;hsa05130;hsa05212;hsa05213;hsa05210;hsa05162;hsa05216;hsa05217;hsa05214;hsa04141;hsa04722;hsa05417;hsa01521;hsa01522;hsa01524;hsa05168;hsa05020;hsa05022;hsa04211;hsa04210;hsa05166;hsa05167;hsa04215;hsa05161;hsa04217;hsa05163;hsa05200;hsa05203;hsa04115;hsa04071;hsa05164;hsa05225;hsa05224;hsa05223;hsa05222;hsa05220;hsa05202;hsa04932;hsa04933;hsa05226;hsa05160;hsa05218;hsa05165;hsa…	Salmonella infection;Shigellosis;Pathogenic Escherichia coli infection;Pancreatic cancer;Endometrial cancer;Colorectal cancer;Measles;Thyroid cancer;Basal cell carcinoma;Glioma;Protein processing in endoplasmic reticulum;Neurotrophin signaling pathway;Lipid and atherosclerosis;EGFR tyrosine kinase inhibitor resistance;Endocrine resistance;Platinum drug resistance;Herpes simplex virus 1 infection;…	ENOG4112738	U:Intracellular trafficking, secretion, and vesicular transport	PF00452.24	Bcl-2	Apoptosis regulator proteins, Bcl-2 family	cytoplasmic
ENSP00000364119.2	EIF2S2	Eukaryotic translation initiation factor 2 subunit 2	8894	pep chromosome:GRCh38:20:34088309:34112243:-1 gene:ENSG00000125977.7 transcript:ENST00000374980.3 gene_biotype:protein_coding transcript_biotype:protein_coding gene_symbol:EIF2S2 description:eukaryotic translation initiation factor 2 subunit beta [Source:HGNC Symbol;Acc:HGNC:3266]	5.9305	2.5682	0.01494	up	yes	40.5452	6.8367	0.1	0.1	0.1	0.1	40.5201	0.1	45.587285424951	17.2005	9.85518	53.894143954376	46.693217543466	70.041121188624	BP:cellular component assembly;BP:metabolic process;BP:macromolecular complex subunit organization;BP:male gonad development;BP:embryo development;BP:embryo development ending in birth or egg hatching;BP:male germ cell proliferation;BP:multicellular organism development;BP:ribonucleoprotein complex subunit organization;BP:in utero embryonic development;BP:gonad development;BP:cellular component o…	GO:0022607;GO:0008152;GO:0043933;GO:0008584;GO:0009790;GO:0009792;GO:0002176;GO:0007275;GO:0071826;GO:0001701;GO:0008406;GO:0016043;GO:0065003;GO:0048513;GO:0071840;GO:0043009;GO:0032502;GO:0032501;GO:0048608;GO:0008283;GO:0003006;GO:0008150;GO:0036093;GO:0001732;GO:0001731;GO:0002183;GO:0022414;GO:0048856;GO:0022618;GO:0009987;GO:0006413GO:0045202;GO:0030054;GO:0005737;GO:0005850;GO:0110165;GO:0…	K03238	EIF2S2	------	------	COG1601	J:Translation, ribosomal structure and biogenesis	PF01873.23	eIF-5_eIF-2B	Domain found in IF2B/IF5	cytoplasmic
ENSP00000467779.2	NSF	Vesicle-fusing ATPase	-	pep chromosome:GRCh38:17:46590694:46757450:1 gene:ENSG00000073969.19 transcript:ENST00000465370.2 gene_biotype:protein_coding transcript_biotype:protein_coding gene_symbol:NSF description:N-ethylmaleimide sensitive factor, vesicle fusing ATPase [Source:HGNC Symbol;Acc:HGNC:8016]	460.231	8.8462	8.969E-5	up	yes	46.0231	0.1	0.1	0.1	0.1	0.1	0.1	0.1	45.134400585988	47.509132722709	38.5817	65.389292861866	16.4718	63.052513393276	------	------	K06027	NSF, SEC18	hsa04721;hsa04962;hsa04727	Synaptic vesicle cycle;Vasopressin-regulated water reabsorption;GABAergic synapse	COG0464	O:Posttranslational modification, protein turnover, chaperones	PF00004.35;PF21964.2;PF02359.24;PF17862.7;PF02933.23;PF13401.12;PF00910.28;PF05496.18;PF13191.12;PF13173.12;PF07728.20;PF13238.12	AAA;NSF_ATPase_lid;CDC48_N;AAA_lid_3;CDC48_2;AAA_22;RNA_helicase;RuvB_N;AAA_16;AAA_14;AAA_5;AAA_18	ATPase family associated with various cellular activities;NSF, AAA+ ATPase lid domain;Cell division protein 48;AAA+ lid domain;Cell division protein 48;AAA domain;RNA helicase;Holliday junction DNA helicase RuvB P-loop domain;AAA ATPase domain;AAA domain;AAA domain;AAA domain	cytoplasmic
ENSP00000323512.8	PIK3R1	Phosphatidylinositol 3-kinase regulatory subunit alpha	5295	pep chromosome:GRCh38:5:68288052:68301480:1 gene:ENSG00000145675.16 transcript:ENST00000320694.13 gene_biotype:protein_coding transcript_biotype:protein_coding gene_symbol:PIK3R1 description:phosphoinositide-3-kinase regulatory subunit 1 [Source:HGNC Symbol;Acc:HGNC:8979]	438.617	8.7768	0.0006324	up	yes	43.8617	0.1	0.1	0.1	0.1	0.1	0.1	0.1	40.8341	27.3444	57.607330842323	54.632449959213	11.3486	71.403052184407	BP:primary metabolic process;BP:cytokine-mediated signaling pathway;BP:signal transduction;BP:cell surface receptor signaling pathway;BP:enzyme linked receptor protein signaling pathway;BP:transmembrane receptor protein tyrosine kinase signaling pathway;BP:response to peptide hormone;BP:cellular response to stimulus;BP:cellular developmental process;BP:cellular response to environmental stimulus;…	GO:0044238;GO:0019221;GO:0007165;GO:0007166;GO:0007167;GO:0007169;GO:0043434;GO:0051716;GO:0048869;GO:0104004;GO:0016310;GO:0006661;GO:0046649;GO:0046488;GO:0046486;GO:0002376;GO:0019637;GO:0045321;GO:0050789;GO:0065007;GO:0046854;GO:0071214;GO:0009719;GO:0006629;GO:1903131;GO:0050794;GO:0001775;GO:0008150;GO:0008152;GO:0090407;GO:0002521;GO:0008654;GO:0050896;GO:1901699;GO:1901701;GO:0071482;GO:…	K02649	PIK3R1_2_3	hsa04670;hsa04929;hsa04926;hsa04923;hsa01521;hsa01522;hsa01524;hsa05168;hsa05169;hsa05164;hsa05165;hsa05166;hsa05167;hsa05160;hsa05161;hsa05162;hsa05163;hsa04910;hsa04014;hsa04012;hsa04914;hsa04915;hsa04919;hsa04152;hsa04150;hsa04151;hsa05230;hsa05171;hsa05170;hsa04550;hsa04650;hsa04024;hsa05418;hsa04140;hsa04380;hsa05415;hsa05417;hsa05142;hsa05146;hsa04625;hsa04620;hsa04360;hsa04071;hsa04973;hsa…	Leukocyte transendothelial migration;GnRH secretion;Relaxin signaling pathway;Regulation of lipolysis in adipocytes;EGFR tyrosine kinase inhibitor resistance;Endocrine resistance;Platinum drug resistance;Herpes simplex virus 1 infection;Epstein-Barr virus infection;Influenza A;Human papillomavirus infection;Human T-cell leukemia virus 1 infection;Kaposi sarcoma-associated herpesvirus infection;He…	ENOG410XP6R	T:Signal transduction mechanisms	PF16454.10;PF00017.30;PF21990.2	PI3K_P85_iSH2;SH2;SH2_1	Phosphatidylinositol 3-kinase regulatory subunit P85 inter-SH2 domain;SH2 domain;SH2 domain	cytoplasmic
ENSP00000320059.10	MMS19	MMS19 nucleotide excision repair protein homolog	64210	pep chromosome:GRCh38:10:97458326:97498384:-1 gene:ENSG00000155229.21 transcript:ENST00000327238.14 gene_biotype:protein_coding transcript_biotype:protein_coding gene_symbol:MMS19 description:MMS19 homolog, cytosolic iron-sulfur assembly component [Source:HGNC Symbol;Acc:HGNC:13824]	420.404	8.7156	0.0003233	up	yes	42.0404	0.1	0.1	0.1	0.1	0.1	0.1	0.1	35.8763	9.0916	41.438030081667	54.331882510268	45.950527089118	65.553833166096	BP:cellular component assembly;BP:nucleic acid metabolic process;BP:cellular component organization or biogenesis;BP:nucleobase-containing compound metabolic process;BP:cellular response to stimulus;BP:cellular component organization;BP:cellular response to stress;BP:DNA repair;BP:cellular process;BP:iron-sulfur cluster assembly;BP:cellular response to DNA damage stimulus;BP:response to stress;BP…	GO:0022607;GO:0090304;GO:0071840;GO:0006139;GO:0051716;GO:0016043;GO:0033554;GO:0006281;GO:0009987;GO:0016226;GO:0006974;GO:0006950;GO:0008150;GO:0008152;GO:0007059;GO:0097428;GO:0044238;GO:0051604;GO:0019538;GO:0050896;GO:0031163;GO:0043170;GO:0006259;GO:0022402GO:0043231;GO:0032806;GO:1990234;GO:0090575;GO:0043229;GO:0043228;GO:1990229;GO:0043227;GO:0043226;GO:1902494;GO:0005737;GO:0005819;GO:0…	K15075	MET18, MMS19	------	------	ENOG410XNMZ	S:Function unknown	PF12460.14;PF14500.11	MMS19_C;MMS19_N	RNAPII transcription regulator C-terminal;Dos2-interacting transcription regulator of RNA-Pol-II	extracellular
ENSP00000497160.1	EIF2B5	Translation initiation factor eIF2B subunit epsilon	8893	pep chromosome:GRCh38:3:184135358:184145311:1 gene:ENSG00000145191.15 transcript:ENST00000648915.2 gene_biotype:protein_coding transcript_biotype:protein_coding gene_symbol:EIF2B5 description:eukaryotic translation initiation factor 2B subunit epsilon [Source:HGNC Symbol;Acc:HGNC:3261]	389.979	8.6073	0.002409	up	yes	38.9979	0.1	0.1	0.1	0.1	0.1	0.1	0.1	9.19118	20.5617	52.1792	56.7661	26.0699	69.219516180976	BP:regulation of primary metabolic process;BP:regulation of metabolic process;BP:positive regulation of response to stimulus;BP:cell development;BP:signal transduction;BP:cell surface receptor signaling pathway;BP:cellular response to stimulus;BP:positive regulation of macromolecule metabolic process;BP:cellular developmental process;BP:positive regulation of biological process;BP:regulation of i…	GO:0080090;GO:0019222;GO:0048584;GO:0048468;GO:0007165;GO:0007166;GO:0051716;GO:0010604;GO:0048869;GO:0048518;GO:0002682;GO:0060255;GO:0048583;GO:0006446;GO:0008366;GO:0043434;GO:0002429;GO:0034284;GO:0010468;GO:0002376;GO:0033554;GO:0009893;GO:0021782;GO:0009891;GO:0010628;GO:0050789;GO:0042552;GO:0002764;GO:0002768;GO:0002684;GO:0065007;GO:0045727;GO:0009889;GO:0048708;GO:0050794;GO:0006950;GO:…	K03240	EIF2B5	hsa05168	Herpes simplex virus 1 infection	COG1208	D:Cell cycle control, cell division, chromosome partitioning	PF25084.1;PF02020.24;PF00132.30;PF24894.1	LbH_EIF2B;W2;Hexapep;Hexapep_GlmU	EIF2B subunit epsilon LbH domain;eIF4-gamma/eIF5/eIF2-epsilon;Bacterial transferase hexapeptide;GlmU-like, C-terminal hexapeptide	cytoplasmic
ENSP00000370043.5	PRPS2	Ribose-phosphate pyrophosphokinase 2	5634	pep chromosome:GRCh38:X:12791412:12824222:1 gene:ENSG00000101911.13 transcript:ENST00000380668.10 gene_biotype:protein_coding transcript_biotype:protein_coding gene_symbol:PRPS2 description:phosphoribosyl pyrophosphate synthetase 2 [Source:HGNC Symbol;Acc:HGNC:9465]	380.618	8.5722	0.002838	up	yes	38.0618	0.1	0.1	0.1	0.1	0.1	0.1	0.1	8.91976	44.6306	43.4535	58.645209808175	63.322636448247	9.39914	BP:NADP metabolic process;BP:phosphorylation;BP:nicotinamide nucleotide metabolic process;BP:nucleotide biosynthetic process;BP:ribonucleoside monophosphate metabolic process;BP:nucleoside monophosphate metabolic process;BP:purine-containing compound biosynthetic process;BP:pyridine-containing compound metabolic process;BP:generation of precursor metabolites and energy;BP:nucleoside monophosphate…	GO:0006739;GO:0016310;GO:0046496;GO:0009165;GO:0009161;GO:0009123;GO:0072522;GO:0072524;GO:0006091;GO:0009124;GO:0019362;GO:0006015;GO:0006163;GO:0006740;GO:0006139;GO:0009156;GO:0009987;GO:0072521;GO:0009058;GO:0008150;GO:0008152;GO:0034654;GO:0090407;GO:0055086;GO:0044238;GO:0051156;GO:0006164;GO:0046390;GO:0046391;GO:0019693;GO:1901137;GO:0006796;GO:0006098;GO:1901293;GO:0006793;GO:0019637;GO:…	K00948	PRPS, prsA	hsa01230;hsa00030;hsa01100;hsa00230;hsa01200	Biosynthesis of amino acids;Pentose phosphate pathway;Metabolic pathways;Purine metabolism;Carbon metabolism	COG0462	S:Function unknown	PF13793.12;PF14572.12;PF00156.33	Pribosyltran_N;Pribosyl_synth;Pribosyltran	N-terminal domain of ribose phosphate pyrophosphokinase;Phosphoribosyl synthetase-associated domain;Phosphoribosyl transferase domain	cytoplasmic
ENSP00000325074.7	PPP2R2A	Serine/threonine-protein phosphatase 2A 55 kDa regulatory subunit B alpha isoform	100328616	pep chromosome:GRCh38:8:26293216:26370886:1 gene:ENSG00000221914.11 transcript:ENST00000315985.7 gene_biotype:protein_coding transcript_biotype:protein_coding gene_symbol:PPP2R2A description:protein phosphatase 2 regulatory subunit Balpha [Source:HGNC Symbol;Acc:HGNC:9304]	366.78	8.5188	0.009062	up	yes	36.678	0.1	0.1	0.1	0.1	0.1	0.1	0.1	51.531590513349	22.0515	16.0578	1.11416	55.6115	73.7011	BP:dephosphorylation;BP:protein dephosphorylation;BP:response to chemical;BP:response to isoquinoline alkaloid;BP:response to organic cyclic compound;BP:response to nitrogen compound;BP:cellular process;BP:macromolecule modification;BP:protein modification process;BP:biological_process;BP:metabolic process;BP:response to morphine;BP:response to alkaloid;BP:primary metabolic process;BP:protein met…	GO:0016311;GO:0006470;GO:0042221;GO:0014072;GO:0014070;GO:1901698;GO:0009987;GO:0043412;GO:0036211;GO:0008150;GO:0008152;GO:0043278;GO:0043279;GO:0044238;GO:0019538;GO:0043170;GO:0006796;GO:0006793;GO:0050896GO:1903293;GO:0045202;GO:0005654;GO:0030054;GO:0110165;GO:0008287;GO:1902494;GO:0032991;GO:0000159;GO:0005829;GO:0005575;GO:0098978GO:0019208;GO:0003674;GO:0098772;GO:0019888;GO:0030234	K04354	PPP2R2	hsa04660;hsa04152;hsa05142;hsa04728;hsa04530;hsa03015;hsa04071;hsa05165;hsa04390;hsa05160;hsa04261;hsa04151	T cell receptor signaling pathway;AMPK signaling pathway;Chagas disease;Dopaminergic synapse;Tight junction;mRNA surveillance pathway;Sphingolipid signaling pathway;Human papillomavirus infection;Hippo signaling pathway;Hepatitis C;Adrenergic signaling in cardiomyocytes;PI3K-Akt signaling pathway	COG5170	T:Signal transduction mechanisms	PF24814.1;PF24807.1;PF23414.1;PF23409.1	WD40_Prp19;WD40_CDC20-Fz;Beta-prop_EML_2;Beta-prop_EML	Prp19 WD40 domain;CDC20/Fizzy WD40 domain;Echinoderm microtubule-associated protein second beta-propeller;Echinoderm microtubule-associated protein first beta-propeller	cytoplasmic
