# Supplementary material for: Multi-omics analysis of immunometabolic mechanisms linking IL-33 with asthma control in children
Source: Research Square preprint supplement (doi:10.21203/rs.3.rs-8032834/v1), 2025-11-25
Supplement: Supplementary file 3 [file d98a4f950df59d5b6dc11c36.xlsx]

## Sheet: 差异脂质详情表
Lipid	Metab ID	Significant	Regulate	Compound ID	VIP_pred_OPLS-DA	VIP_PLS-DA	FC(High IL-33/Low IL-33)	P_value	FDR	Category	Class	Class name	脂质中文名称	H1	H2	H3	H4	H5	H6	L1	L2	L3	L4	L5	L6
PE(18:3e/20:4)	metab_954	yes	down	-	1.3282	1.4173	0.9698	0.01142	0.1032	GP	PE	phosphatidylethanolamine	磷脂酰乙醇胺	7.9785	7.892	7.8927	7.7471	7.5443	7.9177	8.1307	7.9831	7.9262	8.1855	8.1898	8.0241
GM3(d16:0/18:1)	metab_931	yes	down	-	1.4913	1.5318	0.9595	0.01653	0.1301	SP	GM3	Gangliosides	神经节苷脂	7.1875	7.1651	7.2382	7.0895	7.3459	7.6483	7.4825	7.6885	7.8776	7.504	7.4202	7.5436
PE(18:0/22:6)	metab_998	yes	up	-	1.5456	1.4757	1.0334	0.005189	0.06176	GP	PE	phosphatidylethanolamine	磷脂酰乙醇胺	8.0598	8.4191	7.968	8.206	8.2748	8.2488	7.7732	7.9382	7.9453	8.0353	7.9419	7.9539
CL(18:2/16:0/16:0/20:1)	metab_1089	yes	up	-	1.8082	1.7948	1.046	0.0009654	0.02086	GP	CL	Cardiolipin	心磷脂	8.2125	7.9084	8.1372	8.2933	8.1229	7.9854	7.6326	7.7387	7.6363	7.9715	7.7378	7.8013
PC(16:1/18:2)	metab_1131	yes	up	-	2.4452	2.4233	1.0835	0.00503	0.06176	GP	PC	phosphatidylcholine	磷脂酰胆碱	8.9478	8.6781	8.9089	8.8572	8.7603	9.1208	7.6612	8.6996	8.7419	8.1938	7.8884	7.9854
PS(18:2/22:6)	metab_1159	yes	up	-	1.8681	1.8207	1.0519	0.0008157	0.02077	GP	PS	phosphatidylserine	磷脂酰丝氨酸	7.1674	7.5537	7.1868	7.3496	7.5266	7.3389	6.8723	6.994	6.896	7.0937	6.9953	7.0949
Cer(d16:0/24:0)	metab_1326	yes	down	-	1.3762	1.3468	0.9711	0.0008937	0.02077	SP	Cer	Ceramides	神经酰胺	6.7124	6.5929	6.7187	6.6528	6.5729	6.6458	6.8284	6.7358	6.9165	6.8711	6.9602	6.7729
PE(18:0/20:4)	metab_958	yes	up	-	1.7399	1.7141	1.0456	0.01496	0.1224	GP	PE	phosphatidylethanolamine	磷脂酰乙醇胺	8.9127	9.1162	8.9761	8.8771	9.0302	8.6942	8.7525	8.6208	7.9553	8.6466	8.6311	8.6563
CL(18:2/16:0/18:0/22:1)	metab_988	yes	up	-	1.7212	1.7089	1.0399	0.001756	0.02956	GP	CL	Cardiolipin	心磷脂	8.7446	8.4934	8.7225	8.9377	8.64	8.5945	8.2599	8.3238	8.2165	8.5522	8.3895	8.3926
PE(16:0/18:1)	metab_1033	yes	up	-	2.0791	2.0399	1.0553	3.627E-5	0.004426	GP	PE	phosphatidylethanolamine	磷脂酰乙醇胺	8.0403	7.9964	8.0445	7.9411	7.9775	7.7341	7.4972	7.5652	7.4258	7.6926	7.5341	7.5168
PE(18:1/20:4)	metab_1099	yes	up	-	1.5741	1.5379	1.0385	0.006466	0.06859	GP	PE	phosphatidylethanolamine	磷脂酰乙醇胺	8.0425	8.088	7.9688	7.7744	8.0081	7.7506	7.7873	7.7102	7.3444	7.6981	7.6479	7.6826
PE(18:3e/22:6)	metab_1171	yes	down	-	1.7214	1.7746	0.9429	0.01392	0.1191	GP	PE	phosphatidylethanolamine	磷脂酰乙醇胺	6.9309	6.9835	7.0611	6.4057	6.7389	7.3733	7.2202	7.2844	7.3547	7.4235	7.5146	7.2152
CL(16:0/20:0/18:0/20:0)	metab_1198	yes	down	-	1.0291	1.0317	0.9837	0.02562	0.1583	GP	CL	Cardiolipin	心磷脂	8.8477	8.7627	8.7465	8.8224	9.041	8.9784	9.0342	9.1065	9.0617	8.9688	8.9877	8.9178
PS(18:1/20:2)	metab_1270	yes	up	-	2.3405	2.2972	1.0798	0.000257	0.01454	GP	PS	phosphatidylserine	磷脂酰丝氨酸	7.5227	7.4967	7.6287	7.6664	7.3596	7.2313	6.8676	6.9464	6.6443	7.18	7.0604	6.8849
PC(30:1/20:4)	metab_1284	yes	down	-	1.4734	1.4352	0.9694	0.0007071	0.02077	GP	PC	phosphatidylcholine	磷脂酰胆碱	7.1097	7.1658	7.1884	6.9507	7.1893	6.9916	7.2962	7.2802	7.3223	7.3425	7.4051	7.2926
OAHFA(18:2/20:4)	metab_1309	yes	down	-	1.9534	2.1274	0.8976	0.04608	0.2416	FA	OAHFA	OAcyl-(gamma-hydroxy)FA	（O-酰基）-1-羟基脂肪酸	5.4992	7.0858	5.5997	5.5773	5.62	6.6453	6.9934	6.8388	6.3482	6.5822	6.4144	6.9656
CL(24:2/18:0/18:2/22:5)	metab_1421	yes	up	-	1.7848	1.7251	1.0444	0.0005048	0.02053	GP	CL	Cardiolipin	心磷脂	7.4658	7.6159	7.6227	7.5375	7.6554	7.4439	7.2611	7.1982	7.039	7.4399	7.2348	7.243
CL(22:3/16:0/16:0/20:4)	metab_1037	yes	up	-	1.687	1.6564	1.0382	0.0006494	0.02077	GP	CL	Cardiolipin	心磷脂	8.1356	8.2546	8.1013	8.0317	8.2179	7.8855	7.809	7.7951	7.7045	7.9044	7.7709	7.8496
CL(18:3/16:0/18:2/22:0)	metab_1149	yes	up	-	2.4586	2.2819	1.1203	0.04724	0.2416	GP	CL	Cardiolipin	心磷脂	7.592	7.3233	7.2454	7.1164	7.3569	7.735	5.6211	7.4007	7.2548	7.3856	5.9973	5.944
Hex1Cer(t17:1/20:4)	metab_1172	yes	up	-	1.7517	1.7436	1.0393	1.639E-5	0.003836	SP	Hex1Cer	Simple Glc series	糖基神经酰胺	7.6333	7.8161	7.857	7.7244	7.8444	7.7871	7.4945	7.4312	7.5364	7.4572	7.4609	7.5151
CL(21:1/22:6/18:1/18:2)	metab_1274	yes	down	-	2.6064	2.4826	0.906	0.0008318	0.02077	GP	CL	Cardiolipin	心磷脂	6.7996	6.1529	6.9127	6.266	6.7861	6.3004	7.1448	7.223	7.0817	7.2428	7.4294	7.1615
CL(21:1/18:0/18:2/20:0)	metab_1168	yes	up	-	1.6753	1.647	1.0467	0.005174	0.06176	GP	CL	Cardiolipin	心磷脂	7.4255	7.1955	7.4445	7.6572	7.281	7.3277	6.9338	7.0194	6.8692	7.326	7.1054	7.0985
CL(18:2/18:0/20:4/22:1)	metab_1079	yes	up	-	1.8098	1.7868	1.0416	0.0007293	0.02077	GP	CL	Cardiolipin	心磷脂	8.7377	8.9569	8.7999	8.6979	8.8501	8.5042	8.5273	8.4085	8.248	8.4186	8.4061	8.4418
CL(18:2/20:4/22:3/22:6)	metab_1337	yes	up	-	1.5936	1.5494	1.0452	0.007947	0.08086	GP	CL	Cardiolipin	心磷脂	6.9586	7.0224	6.9792	6.8527	6.7618	6.625	6.7039	6.7028	6.2862	6.6598	6.523	6.5423
CL(18:2/18:0/18:0/20:3)	metab_1411	yes	up	-	2.1632	2.1521	1.1085	0.01204	0.1049	GP	CL	Cardiolipin	心磷脂	6.2331	6.2895	5.8789	5.4176	6.2532	6.0217	5.6739	4.8493	5.6789	5.4631	5.6656	5.2316
CL(20:4/18:1/20:0/20:4)	metab_1220	yes	up	-	1.6643	1.6236	1.0425	0.004499	0.05934	GP	CL	Cardiolipin	心磷脂	7.9225	7.9532	7.8412	7.6438	7.8201	7.6259	7.6412	7.539	7.1649	7.5331	7.4988	7.5199
PE(18:1/18:1)	metab_1195	yes	up	-	2.3011	2.2676	1.0815	0.001545	0.02891	GP	PE	phosphatidylethanolamine	磷脂酰乙醇胺	7.6807	7.6993	7.8553	8.0018	7.4501	7.2791	7.087	7.0046	6.9347	7.3397	7.2905	6.8482
dMePE(16:0e/22:6)	metab_1238	yes	down	-	1.2701	1.2331	0.9723	0.01791	0.1325	GP	dMePE	dimethylphosphatidylethanolamine	二甲基磷脂酰乙醇胺	7.0773	7.3339	7.0624	7.0178	7.1326	6.9256	7.3052	7.1149	7.2988	7.2447	7.43	7.3681
CL(23:0/18:2/20:0/22:6)	metab_1272	yes	down	-	1.4794	1.4748	0.9581	0.01969	0.1353	GP	CL	Cardiolipin	心磷脂	6.7343	7.1893	6.7121	6.8723	6.7599	6.8611	6.979	7.4028	7.368	6.9357	7.1838	7.0609
PC(16:1e/16:1)	metab_1463	yes	down	-	2.1878	2.0365	0.9198	0.02095	0.1402	GP	PC	phosphatidylcholine	磷脂酰胆碱	7.1334	6.131	7.168	6.1333	6.9491	6.2332	7.1945	7.2974	7.0729	7.1228	7.3111	7.2223
CL(18:2/16:0/20:4/24:1)	metab_1040	yes	up	-	1.1713	1.1619	1.0229	0.01961	0.1353	GP	CL	Cardiolipin	心磷脂	8.2871	8.6188	8.3317	8.2216	8.3988	8.2309	8.213	8.059	8.1584	8.0934	8.2006	8.2443
PC(32:1/20:4)	metab_1110	yes	down	-	1.6274	1.5782	0.9645	0.0008512	0.02077	GP	PC	phosphatidylcholine	磷脂酰胆碱	7.3783	7.4696	7.4428	7.2653	7.4894	7.1484	7.5707	7.6782	7.6423	7.6355	7.6953	7.6005
PS(20:2/20:4)	metab_1181	yes	up	-	1.9913	1.9837	1.0579	0.0007154	0.02077	GP	PS	phosphatidylserine	磷脂酰丝氨酸	7.75	8.1196	7.9148	7.7983	8.0053	7.581	7.5726	7.3781	7.292	7.3737	7.4441	7.5275
PC(18:2e/18:2)	metab_1321	yes	up	-	1.2463	1.2508	1.0161	5.585E-5	0.005451	GP	PC	phosphatidylcholine	磷脂酰胆碱	9.8173	9.859	9.9155	9.9406	9.8879	9.8955	9.7449	9.6983	9.7413	9.7027	9.6969	9.7929
GM3(d18:1/16:1)	metab_1340	yes	down	-	1.6805	1.7828	0.9291	0.04216	0.2338	SP	GM3	Gangliosides	神经节苷脂	6.2444	5.8703	5.9464	5.4884	6.3264	6.7582	6.4719	6.8358	6.8082	6.6323	6.3502	6.3317
CL(19:0/16:0/16:0/22:6)	metab_1351	yes	down	-	1.9421	1.9888	0.9322	0.003174	0.04575	GP	CL	Cardiolipin	心磷脂	6.3684	6.4005	6.2543	6.1619	6.4309	6.8357	6.7824	7.1645	6.9348	6.8614	6.9028	6.6052
LdMePE(15:0)	metab_1365	yes	down	-	2.4845	2.4376	0.8791	0.01947	0.1353	GP	LdMePE	lysodimethylphosphatidylethanolamine	溶血二甲基磷脂酰乙醇胺	5.8051	5.1267	5.8481	5.7135	6.9058	6.0367	6.7129	7.1384	6.7949	6.8614	5.9106	6.8877
PE(18:0/20:3)	metab_1084	yes	up	-	1.4424	1.3375	1.03	0.009451	0.09044	GP	PE	phosphatidylethanolamine	磷脂酰乙醇胺	7.9121	7.8437	7.8776	7.6153	7.787	7.931	7.5752	7.7709	7.4714	7.7413	7.4662	7.5727
dMePE(18:1/20:4)	metab_1146	yes	up	-	1.4532	1.4354	1.0356	0.009792	0.09189	GP	dMePE	dimethylphosphatidylethanolamine	二甲基磷脂酰乙醇胺	7.499	7.816	7.5039	7.3979	7.5772	7.5453	7.4222	7.231	7.438	7.1354	7.4075	7.1478
PC(18:0e/22:4)	metab_1160	yes	down	-	2.5977	2.4702	0.8918	0.01906	0.1353	GP	PC	phosphatidylcholine	磷脂酰胆碱	7.8376	6.7822	6.1803	6.7155	7.7973	6.3162	8.0918	7.7805	7.7009	7.7322	7.5834	7.7907
Hex2Cer(d18:1/22:0)	metab_1214	yes	up	-	1.4234	1.3893	1.037	0.01457	0.1224	SP	Hex2Cer	Simple Glc series	糖基神经酰胺	7.1372	7.4801	7.463	7.0504	7.2251	7.0009	7.0411	6.9046	6.9353	6.9824	7.041	6.9017
Cer(t18:0/24:0+O)	metab_1304	yes	down	-	1.6676	1.6476	0.9596	0.0003573	0.01744	SP	Cer	Ceramides	神经酰胺	6.8055	6.8074	6.8414	6.7571	6.6687	6.721	7.0032	7.0261	7.1521	7.0343	7.2124	6.8849
PE(16:1e/22:6)	metab_960	yes	down	-	1.0613	1.0374	0.9827	0.02154	0.142	GP	PE	phosphatidylethanolamine	磷脂酰乙醇胺	8.539	8.6653	8.309	8.4909	8.6172	8.4995	8.6464	8.6554	8.6625	8.635	8.7791	8.6435
CL(23:0/18:0/18:1/20:4)	metab_1090	yes	up	-	1.4797	1.4504	1.0321	0.001084	0.02204	GP	CL	Cardiolipin	心磷脂	7.5488	7.5706	7.5116	7.5159	7.508	7.3351	7.3504	7.2781	7.0919	7.3437	7.2489	7.2798
Hex3Cer(d16:0/26:1)	metab_1256	yes	down	-	1.1944	1.1385	0.9758	0.01767	0.1325	SP	Hex3Cer	Simple Glc series	糖基神经酰胺	7.0068	6.8367	7.0011	6.8304	7.0224	6.9881	7.2136	7.2447	7.1577	6.9109	7.1179	7.0759
CL(23:0/20:3/20:4/18:0)	metab_1317	yes	up	-	1.8517	1.837	1.0664	0.01113	0.1025	GP	CL	Cardiolipin	心磷脂	7.0112	7.4725	7.0701	6.9266	7.1807	6.7485	6.8961	6.179	6.5896	6.6394	6.772	6.6939
PE(18:1e/16:0)	metab_1361	yes	down	-	1.0999	1.0462	0.9813	0.01197	0.1049	GP	PE	phosphatidylethanolamine	磷脂酰乙醇胺	7.414	7.3558	7.4349	7.3353	7.3873	7.3686	7.5944	7.4565	7.3799	7.4812	7.679	7.5531
PC(18:0e/22:6)	metab_944	yes	down	-	1.183	1.1319	0.978	0.01856	0.1352	GP	PC	phosphatidylcholine	磷脂酰胆碱	7.7339	8.011	7.8567	7.6973	7.8081	7.8111	7.9627	7.9419	8.1038	7.8257	8.1019	8.0401
PE(16:0/18:2)	metab_992	yes	up	-	1.6196	1.6138	1.0388	0.003116	0.04575	GP	PE	phosphatidylethanolamine	磷脂酰乙醇胺	8.3498	8.028	8.2711	8.44	8.2718	8.1302	7.8167	7.9201	7.83	8.1591	7.9274	7.9937
Hex1Cer(d18:1/23:0)	metab_1024	yes	down	-	1.0108	0.9396	0.9834	0.03622	0.209	SP	Hex1Cer	Simple Glc series	糖基神经酰胺	7.8866	7.6425	7.9611	7.8858	7.9892	7.7966	8.0051	7.9864	7.9728	8.0279	8.0497	7.9167
PE(18:0/22:5)	metab_1091	yes	up	-	1.6551	1.6008	1.0382	0.000983	0.02086	GP	PE	phosphatidylethanolamine	磷脂酰乙醇胺	7.6161	7.7667	7.7755	7.7068	7.8252	7.6059	7.4537	7.3892	7.2484	7.627	7.4279	7.4458
GM3(d18:1/16:0+O)	metab_1432	yes	down	-	1.9	1.9349	0.9167	0.03234	0.1901	SP	GM3	Gangliosides	神经节苷脂	6.0817	5.1041	5.7977	5.5959	6.0932	6.5159	6.3641	6.6203	6.5965	6.4777	6.1641	6.166
PE(18:0/18:1)	metab_1048	yes	up	-	1.8966	1.8449	1.0455	0.0002682	0.01454	GP	PE	phosphatidylethanolamine	磷脂酰乙醇胺	8.2947	8.2048	8.3308	8.3626	8.1371	8.1317	7.8461	7.8773	7.7792	8.0725	7.9904	7.7458
PE(18:0/22:4)	metab_1113	yes	up	-	1.6222	1.563	1.0427	0.009445	0.09044	GP	PE	phosphatidylethanolamine	磷脂酰乙醇胺	7.7005	7.8388	7.7406	7.4102	7.6516	7.4671	7.4799	7.3532	6.9911	7.4265	7.3769	7.3064
CL(20:5/15:0/16:0/24:1)	metab_1302	yes	down	-	1.0352	1.1043	0.9779	0.0364	0.209	GP	CL	Cardiolipin	心磷脂	7.8744	7.7948	7.8167	7.6716	7.5613	7.9768	7.9717	7.9032	7.8174	8.0504	8.0929	7.918
phSM(d19:1/20:4)	metab_1496	yes	up	-	1.5158	1.5268	1.0334	0.005655	0.06272	SP	phSM	sphingomyelin(phytosphingosine)	鞘磷脂	8.5557	8.3367	8.6449	8.6219	8.7227	8.503	8.4383	8.3403	8.3982	8.2899	8.1885	8.0646
PE(18:1/18:2)	metab_1056	yes	up	-	1.5172	1.5242	1.0418	0.02236	0.1433	GP	PE	phosphatidylethanolamine	磷脂酰乙醇胺	8.3025	7.7522	8.2984	8.3803	8.0529	8.0197	7.7525	7.8245	7.5074	8.0466	7.8716	7.8477
CL(22:6/18:0/20:0/22:5)	metab_1353	yes	up	-	1.7489	1.6736	1.0405	0.001659	0.02891	GP	CL	Cardiolipin	心磷脂	8.0107	8.3852	7.9228	8.1394	8.2099	8.1843	7.6723	7.8333	7.8337	7.9332	7.8354	7.8403
LPE(22:5)	metab_1145	yes	up	-	1.316	1.2917	1.0269	0.003281	0.04575	GP	LPE	lysophosphatidylethanolamine	溶血磷脂酰乙醇胺	7.4928	7.402	7.4847	7.484	7.5576	7.5443	7.3305	7.3687	7.0709	7.3609	7.3388	7.3156
Hex3Cer(d16:0/24:1)	metab_1262	yes	down	-	1.208	1.1467	0.9737	0.0407	0.2309	SP	Hex3Cer	Simple Glc series	糖基神经酰胺	6.9904	6.7568	7.0078	6.8726	7.1441	7.011	7.2804	7.2485	7.2403	6.8947	7.1624	7.0863
PS(18:2/18:2)	metab_1280	yes	up	-	2.2337	2.1623	1.0856	0.004984	0.06176	GP	PS	phosphatidylserine	磷脂酰丝氨酸	7.373	7.0994	7.3366	7.5361	6.9265	7.0365	6.366	6.7335	6.7045	7.0061	6.8917	6.1928
CL(22:6/18:1/20:0/22:6)	metab_1292	yes	up	-	1.1111	1.0707	1.0207	0.01587	0.127	GP	CL	Cardiolipin	心磷脂	7.4777	7.6197	7.3638	7.4497	7.3913	7.3786	7.3037	7.3146	7.1357	7.3667	7.3605	7.2974
CL(18:2/16:0/16:0/24:1)	metab_1395	yes	up	-	1.4558	1.3865	1.051	0.04753	0.2416	GP	CL	Cardiolipin	心磷脂	5.7667	5.9998	5.6687	6.0344	5.4146	5.71	5.5204	5.7792	5.2091	5.612	5.4349	5.3589
PE(18:0e/22:6)	metab_1406	yes	down	-	1.2701	1.2331	0.9723	0.01791	0.1325	GP	PE	phosphatidylethanolamine	磷脂酰乙醇胺	7.0773	7.3339	7.0624	7.0178	7.1326	6.9256	7.3052	7.1149	7.2988	7.2447	7.43	7.3681
CL(12:0/20:0/20:0/14:0)	metab_1407	yes	down	-	2.065	2.1604	0.8781	0.04681	0.2416	GP	CL	Cardiolipin	心磷脂	5.5358	4.5566	4.7323	4.7802	5.584	5.9684	5.8998	6.744	5.9381	6.1596	5.5022	5.2392
PC(16:1e/16:0)	metab_1008	yes	down	-	1.1406	1.0954	0.983	0.003071	0.04575	GP	PC	phosphatidylcholine	磷脂酰胆碱	7.9934	8.0152	8.1161	7.9913	8.0095	7.983	8.1783	8.1782	8.0512	8.1025	8.262	8.1698
PE(16:0/20:4)	metab_1051	yes	up	-	1.4766	1.4544	1.0302	0.001644	0.02891	GP	PE	phosphatidylethanolamine	磷脂酰乙醇胺	8.2486	8.345	8.2033	8.1787	8.347	8.0155	7.9805	7.9748	7.8953	8.0754	7.9477	8.0211
CL(21:0/16:0/20:0/22:6)	metab_1081	yes	down	-	1.2041	1.1705	0.9809	0.005545	0.06272	GP	CL	Cardiolipin	心磷脂	8.4866	8.7374	8.4988	8.5338	8.6509	8.5216	8.6521	8.7491	8.7937	8.6839	8.803	8.7544
CL(18:2/16:0/20:0/20:3)	metab_1243	yes	up	-	2.0163	1.9922	1.0612	0.003066	0.04575	GP	CL	Cardiolipin	心磷脂	8.2189	7.8937	8.2226	8.2869	7.9426	7.916	7.4302	7.6804	7.2583	7.9141	7.711	7.6909
CL(18:1/16:0/18:0/18:0)	metab_1387	yes	up	-	2.2128	2.1686	1.0634	2.358E-5	0.003836	GP	CL	Cardiolipin	心磷脂	7.9386	7.9032	7.9415	7.8252	7.8596	7.6192	7.319	7.42	7.2628	7.5456	7.3818	7.3535
CL(23:0/16:0/18:2/22:0)	metab_1416	yes	down	-	1.5736	1.5062	0.9651	0.001537	0.02891	GP	CL	Cardiolipin	心磷脂	7.0136	7.2095	6.9598	7.0724	7.0563	6.9902	7.2961	7.167	7.3353	7.1788	7.4423	7.4078
PC(32:1/22:5)	metab_1470	yes	down	-	1.51	1.475	0.9685	0.0005486	0.02059	GP	PC	phosphatidylcholine	磷脂酰胆碱	7.1991	7.2165	7.2847	7.0154	7.1209	7.0996	7.3886	7.4019	7.32	7.3371	7.4958	7.3887
CL(23:0/16:0/18:2/22:6)	metab_1144	yes	down	-	1.115	1.098	0.9818	0.007954	0.08086	GP	CL	Cardiolipin	心磷脂	8.1239	8.3015	8.077	8.1014	8.116	8.2257	8.2671	8.2673	8.2981	8.2371	8.4279	8.3575
PE(16:0/22:4)	metab_1229	yes	up	-	1.8283	1.7644	1.0655	0.02665	0.1624	GP	PE	phosphatidylethanolamine	磷脂酰乙醇胺	7.5192	7.3951	7.3253	6.9007	7.1891	7.1252	6.8528	6.849	6.0898	7.0937	6.9672	6.9319
PC(18:1e/18:2)	metab_1043	yes	down	-	1.0267	0.9585	0.9836	0.02874	0.1711	GP	PC	phosphatidylcholine	磷脂酰胆碱	7.9088	7.8986	8.218	7.9875	8.0223	7.9037	8.1306	8.1296	8.092	8.0832	8.1798	8.1208
PE(16:0/22:5)	metab_1136	yes	up	-	1.7954	1.7298	1.041	0.0002206	0.01454	GP	PE	phosphatidylethanolamine	磷脂酰乙醇胺	7.9287	7.9666	7.9408	7.854	8.0728	7.9343	7.6379	7.7356	7.4637	7.7829	7.5588	7.6445
PC(32:1/18:2)	metab_1469	yes	down	-	1.8683	1.8182	0.9541	2.149E-5	0.003836	GP	PC	phosphatidylcholine	磷脂酰胆碱	6.8108	6.6965	6.9306	6.7666	6.8621	6.801	7.1025	7.2519	7.1672	7.0993	7.1665	7.0467
PC(18:1e/20:4)	metab_961	yes	down	-	1.0625	0.943	0.9834	0.04673	0.2416	GP	PC	phosphatidylcholine	磷脂酰胆碱	8.2284	8.2262	8.362	8.2509	8.356	8.0731	8.416	8.2637	8.3308	8.3021	8.5175	8.4955
CL(24:0/16:0/16:0/18:1)	metab_963	yes	up	-	1.1448	1.0975	1.0167	0.006429	0.06859	GP	CL	Cardiolipin	心磷脂	8.7628	8.8751	8.8697	8.6497	8.8426	8.8658	8.732	8.6431	8.7061	8.6783	8.5845	8.6535
Hex1Cer(d18:1/24:0)	metab_978	yes	down	-	1.095	1.0538	0.9823	0.009065	0.09028	SP	Hex1Cer	Simple Glc series	糖基神经酰胺	7.857	7.6658	7.8844	7.8134	7.8917	7.7269	7.9578	7.9298	7.9909	8.0101	7.9525	7.8492
PE(18:0/18:2)	metab_991	yes	up	-	1.5886	1.5694	1.0345	0.003505	0.04751	GP	PE	phosphatidylethanolamine	磷脂酰乙醇胺	8.8205	8.5642	8.7883	9.0166	8.719	8.7469	8.385	8.4477	8.3544	8.6831	8.5139	8.5149
GM3(d16:0/26:1)	metab_1138	yes	down	-	1.3387	1.3694	0.9655	0.02097	0.1402	SP	GM3	Gangliosides	神经节苷脂	7.0576	6.9951	7.1441	6.9446	7.0936	7.4109	7.3164	7.5259	7.5479	7.2482	7.1448	7.39
CL(22:5/20:4/16:0/20:0)	metab_1215	yes	up	-	1.9448	1.8749	1.0482	0.0001015	0.008252	GP	CL	Cardiolipin	心磷脂	7.8047	7.8637	7.8286	7.7251	7.9464	7.7969	7.4678	7.5746	7.2891	7.6216	7.3882	7.4687
CL(22:5/18:0/20:4/22:0)	metab_1234	yes	up	-	1.9151	1.8118	1.0562	0.003243	0.04575	GP	CL	Cardiolipin	心磷脂	7.2194	7.2873	7.1468	6.9412	7.3481	7.331	7.0669	6.9835	6.586	6.9219	6.7537	6.6554
MLCL(14:2/20:4/20:4)	metab_1237	yes	down	-	2.8532	2.7089	0.8823	0.0226	0.1433	GP	MLCL	Monolysocardiolipin	单溶心磷脂	7.8666	6.4851	8.4678	6.5691	8.6302	7.502	8.4881	8.7109	8.5434	8.5386	8.684	8.6286
PI(20:5/20:4)	metab_1325	yes	up	-	1.3415	1.4056	1.0409	0.02244	0.1433	GP	PI	phosphatidylinositol	磷脂酰肌醇	7.0088	7.312	7.1664	7.1084	7.1994	6.6903	6.8077	6.6074	6.828	6.7019	6.9055	6.9656
CL(21:0/20:1/20:0/20:4)	metab_1418	yes	down	-	2.0322	1.9976	0.9395	0.0004868	0.02053	GP	CL	Cardiolipin	心磷脂	6.3904	6.474	6.4682	6.4387	6.3546	6.0997	6.769	6.5968	6.6456	6.8324	6.9609	6.8833
TG(18:0/18:1/18:1)	metab_18	yes	up	C00422	1.5745	1.4775	1.0331	0.002974	0.07306	GL	TG	triglyceride	甘油三酯	9.9848	9.8698	10.0257	10.0883	9.8016	9.9807	9.622	9.3608	9.7991	9.8033	9.5383	9.7132
SM(t18:1/16:0)	metab_15	yes	down	-	1.4396	1.3531	0.9719	0.0002272	0.03368	SP	SM	sphingomyelin	鞘磷脂	8.3174	8.1211	8.1721	8.2132	8.3516	8.2164	8.5197	8.4959	8.5042	8.4212	8.5031	8.378
TG(16:0/16:0/18:1)	metab_11	yes	up	C00422	1.0262	0.9753	1.0155	0.01491	0.143	GL	TG	triglyceride	甘油三酯	10.1451	9.9176	10.1107	10.1873	10.1289	10.0072	9.8288	9.8995	9.892	10.0738	9.9577	9.906
PC(18:3e/22:4)	metab_116	yes	down	-	1.0888	1.0326	0.9795	0.02542	0.1849	GP	PC	phosphatidylcholine	磷脂酰胆碱	9.0164	9.2499	8.9028	8.9638	9.0079	9.0105	9.1413	9.0943	9.3853	9.0778	9.3454	9.2398
PC(18:2e/20:2)	metab_134	yes	down	-	1.2266	1.1318	0.9788	0.01138	0.1401	GP	PC	phosphatidylcholine	磷脂酰胆碱	9.7962	9.6887	9.8109	9.598	9.8631	9.5027	9.9836	9.8519	9.8972	9.8	10.0513	9.935
PC(14:0e/18:2)	metab_198	yes	down	-	1.2185	1.1704	0.9773	0.00274	0.07306	GP	PC	phosphatidylcholine	磷脂酰胆碱	8.1818	8.0203	8.163	8.1475	8.0169	8.1227	8.269	8.383	8.1803	8.25	8.4276	8.2702
TG(18:0/16:0/22:6)	metab_440	yes	up	-	1.5223	1.4076	1.0429	0.02138	0.1824	GL	TG	triglyceride	甘油三酯	8.1676	8.4981	8.3065	8.6813	8.1719	8.8337	8.0532	8.0847	8.3683	8.0434	8.0972	7.9292
SPH(d14:1)	metab_459	yes	up	-	2.0656	2.031	1.0925	0.01186	0.1416	SP	SPH	Sphingosine	鞘氨醇	7.6698	7.7302	7.641	7.6713	7.6521	7.3225	7.1697	6.5178	6.6857	6.4197	7.4975	7.5277
PC(15:0/20:4)	metab_89	yes	up	-	1.2437	1.2625	1.0268	0.01328	0.1429	GP	PC	phosphatidylcholine	磷脂酰胆碱	8.9002	9.0941	8.9311	8.863	9.0681	8.628	8.8136	8.6852	8.5329	8.6955	8.6676	8.69
SM(t18:0/16:0)	metab_179	yes	down	-	1.5057	1.43	0.9687	8.895E-5	0.03368	SP	SM	sphingomyelin	鞘磷脂	7.9309	7.7015	7.8653	7.8403	7.7789	7.853	8.1779	8.0971	8.0946	8.0022	8.0648	8.0513
SM(d18:1/18:3)	metab_186	yes	up	-	1.439	1.3744	1.0371	0.03223	0.2036	SP	SM	sphingomyelin	鞘磷脂	9.7829	9.2494	9.8791	9.932	10.1301	9.7605	9.6344	9.2468	9.2138	9.4193	9.5311	9.5895
DG(16:1e/16:0)	metab_216	yes	up	-	1.4112	1.3462	1.0351	0.01265	0.1429	GL	DG	diglyceride	甘油二酯	8.5181	8.2592	8.5703	8.7963	8.3559	8.5853	8.0026	8.3161	8.1421	8.3398	8.3547	8.1932
SM(d16:1/18:3)	metab_133	yes	down	-	1.5368	1.4654	0.9608	0.01407	0.143	SP	SM	sphingomyelin	鞘磷脂	8.7708	8.3644	8.5418	8.5761	8.965	8.9799	8.9793	9.3204	9.163	8.9683	9.0006	8.898
PE(18:1p/22:6)	metab_204	yes	down	-	1.2134	1.1416	0.9769	0.004251	0.07553	GP	PE	phosphatidylethanolamine	磷脂酰乙醇胺	8.241	8.4568	8.2106	8.2953	8.2759	8.3061	8.3943	8.4514	8.5217	8.408	8.66	8.5269
TG(20:0/18:1/18:1)	metab_316	yes	up	C00422	1.6527	1.5967	1.0506	0.02268	0.1824	GL	TG	triglyceride	甘油三酯	8.7597	8.3522	9.1146	9.0828	8.4007	8.9591	8.1128	8.3715	8.3938	8.4805	8.61	8.1639
SM(d18:1/22:6)	metab_467	yes	down	-	1.2731	1.2199	0.9709	0.01291	0.1429	SP	SM	sphingomyelin	鞘磷脂	8.138	7.9111	7.8363	8.164	8.282	8.1213	8.266	8.3791	8.4507	8.3808	8.2328	8.192
SM(d18:1/24:5)	metab_553	yes	down	-	1.9704	1.839	0.9423	0.0001961	0.03368	SP	SM	sphingomyelin	鞘磷脂	7.2755	7.4117	6.9206	7.2661	7.2418	7.1907	7.7837	7.6105	7.5212	7.6153	7.6815	7.7473
MePC(20:4e/21:0)	metab_61	yes	down	-	1.4204	1.3409	0.9697	0.002583	0.07306	GP	MePC	Methyl phosphatidylcholine	甲基磷脂酰胆碱	8.3111	8.5343	8.2551	8.3035	8.2472	8.1383	8.5114	8.4555	8.59	8.6356	8.677	8.4745
PE(16:0p/22:6)	metab_64	yes	down	-	1.1443	1.0715	0.9797	0.006039	0.09816	GP	PE	phosphatidylethanolamine	磷脂酰乙醇胺	8.5837	8.717	8.5162	8.6079	8.6962	8.4759	8.7002	8.7479	8.8053	8.7404	8.9277	8.7406
PC(16:2e/20:2)	metab_107	yes	down	-	1.0705	0.9861	0.9826	0.03053	0.2036	GP	PC	phosphatidylcholine	磷脂酰胆碱	9.9652	9.9911	9.9641	9.9319	9.9684	9.6105	10.0787	9.9954	10.0155	10.0127	10.2035	10.192
DG(18:2e/18:1)	metab_227	yes	up	-	1.0115	0.9418	1.0213	0.04022	0.2194	GL	DG	diglyceride	甘油二酯	8.1183	8.2418	8.2585	8.0728	7.9921	8.1924	8.1086	7.9401	7.9674	8.1649	7.7708	7.9068
SM(d20:0/24:3)	metab_284	yes	down	-	1.4003	1.3272	0.9683	0.004052	0.07454	SP	SM	sphingomyelin	鞘磷脂	8.1653	8.1928	7.8902	7.8631	8.0392	8.0664	8.3014	8.4426	8.3946	8.2105	8.2833	8.1604
TG(18:3/10:2/18:2)	metab_311	yes	down	-	1.6306	1.5385	0.9627	0.0009743	0.04652	GL	TG	triglyceride	甘油三酯	8.304	8.4971	8.538	8.3269	8.4623	8.3501	8.9034	8.597	8.9264	8.6575	8.7196	8.6282
DG(16:2e/16:0)	metab_506	yes	up	-	2.0087	1.9596	1.0886	0.03118	0.2036	GL	DG	diglyceride	甘油二酯	8.7345	8.162	8.6412	8.4952	7.8103	8.3658	7.7963	8.4142	7.1288	6.9375	8.1613	7.6844
PC(16:1e/22:5)	metab_129	yes	down	-	1.193	1.1163	0.9812	0.003156	0.07306	GP	PC	phosphatidylcholine	磷脂酰胆碱	9.4962	9.5536	9.4713	9.4868	9.5493	9.3563	9.6199	9.5643	9.7076	9.6009	9.8132	9.7042
PC(20:3e/24:2)	metab_221	yes	down	-	2.5132	2.3415	0.8886	0.01953	0.1755	GP	PC	phosphatidylcholine	磷脂酰胆碱	8.19	7.5673	8.3934	6.4692	8.2325	6.6897	8.6147	8.6238	8.4141	8.5027	8.5913	8.504
PC(8:0e/11:3)	metab_276	yes	down	-	1.1133	1.0729	0.9734	0.03763	0.2194	GP	PC	phosphatidylcholine	磷脂酰胆碱	7.8647	7.6531	7.6469	7.6548	7.6986	7.9694	7.8156	8.2519	7.8098	8.0011	7.8687	8.0103
LPC(20:4e)	metab_315	yes	down	-	1.0774	1.0333	0.9739	0.04668	0.2394	GP	LPC	lysophosphatidylcholine	溶血磷脂酰胆碱	7.5218	7.5854	7.246	7.185	7.2911	7.3506	7.593	7.7618	7.3725	7.4385	7.5418	7.655
PE(18:1p/18:1)	metab_442	yes	down	-	1.3435	1.2762	0.9705	0.003435	0.07454	GP	PE	phosphatidylethanolamine	磷脂酰乙醇胺	7.7608	7.4193	7.7521	7.5192	7.6255	7.5867	7.8661	7.8473	7.7332	7.8013	7.9247	7.8787
PE(22:6/21:1)	metab_481	yes	down	-	1.2697	1.2242	0.9662	0.0405	0.2194	GP	PE	phosphatidylethanolamine	磷脂酰乙醇胺	7.4821	7.9329	7.9374	7.9029	7.7936	8.0572	8.0825	8.3875	7.7943	8.2323	8.2276	8.0311
SM(t18:1/18:3)	metab_490	yes	down	-	1.0412	0.9649	0.9788	0.0231	0.1824	SP	SM	sphingomyelin	鞘磷脂	7.7034	7.5455	7.5783	7.6238	7.7805	7.5445	7.8653	7.7464	7.9044	7.6006	7.8933	7.755
TG(16:0/18:1/22:0)	metab_307	yes	up	-	1.8562	1.7933	1.0692	0.0253	0.1849	GL	TG	triglyceride	甘油三酯	8.5016	7.6775	8.7845	8.7827	8.1653	8.5275	7.6035	7.8966	7.9105	8.063	8.2235	7.4797
TG(16:0/18:1/23:0)	metab_390	yes	up	-	1.6337	1.6089	1.0618	0.03865	0.2194	GL	TG	triglyceride	甘油三酯	7.8235	6.9509	8.0101	8.0376	7.5901	7.7828	7.0704	7.2041	7.1962	7.6127	7.4193	7.0052
PC(17:1/20:4)	metab_171	yes	up	-	1.874	1.7274	1.0712	0.04126	0.2194	GP	PC	phosphatidylcholine	磷脂酰胆碱	8.4081	8.4971	8.614	8.8051	8.8113	8.6808	6.9266	8.4991	8.0096	8.3585	8.2976	8.2784
SM(t18:1/24:0)	metab_200	yes	down	-	1.5026	1.4179	0.9669	0.0007278	0.04634	SP	SM	sphingomyelin	鞘磷脂	8.0723	8.1918	7.9729	7.972	8.1346	8.019	8.3691	8.295	8.5339	8.2192	8.2889	8.3073
SM(d18:1/17:1)	metab_202	yes	down	-	1.0964	1.0387	0.9769	0.0223	0.1824	SP	SM	sphingomyelin	鞘磷脂	8.0996	7.9202	7.8901	7.9484	8.2994	8.1067	8.1558	8.3094	8.3273	8.1881	8.2608	8.1637
PC(20:2e/20:2)	metab_245	yes	down	-	1.8018	1.6824	0.9459	0.02219	0.1824	GP	PC	phosphatidylcholine	磷脂酰胆碱	8.8451	9.0263	7.8456	8.904	8.8763	8.6549	9.3667	9.2554	8.9783	9.1539	9.1956	9.1832
CL(20:4/16:1/18:0/24:1)	metab_249	yes	up	-	1.0072	0.9563	1.0201	0.03355	0.2099	GP	CL	Cardiolipin	心磷脂	8.2988	8.386	8.5072	8.6112	8.5899	8.3985	8.3086	8.1369	8.4289	8.1921	8.3533	8.3658
SM(d19:0/24:3)	metab_278	yes	down	-	1.2367	1.1894	0.9706	0.02433	0.1825	SP	SM	sphingomyelin	鞘磷脂	8.1201	8.0373	7.9593	7.8046	8.3418	8.2105	8.2748	8.4572	8.4638	8.1328	8.3203	8.2947
PC(18:0/20:1)	metab_302	yes	down	-	2.7128	2.5828	0.8735	0.01288	0.1429	GP	PC	phosphatidylcholine	磷脂酰胆碱	6.7187	7.2532	7.3704	7.0509	8.4376	8.8118	8.6726	9.3872	8.5228	8.6209	8.5475	8.5038
ChE(18:0)	metab_374	yes	down	-	1.6773	1.5824	0.9456	0.01864	0.1695	ST	ChE	Cholesterol Ester	胆固醇酯	7.3412	7.3845	7.4595	7.4028	7.1907	6.5434	7.695	7.413	7.6578	7.6535	7.7414	7.6511
DG(16:1e/15:0)	metab_441	yes	up	-	1.2788	1.2114	1.0329	0.02156	0.1824	GL	DG	diglyceride	甘油二酯	8.0913	7.7434	7.9891	7.8871	7.9207	8.0279	7.6585	7.6251	7.4411	8.0344	7.6776	7.7008
SM(d18:0/23:0)	metab_485	yes	down	-	1.9842	1.8728	0.9363	0.008875	0.1246	SP	SM	sphingomyelin	鞘磷脂	7.7942	8.4229	7.6892	8.4734	8.6411	8.4787	8.8739	8.8618	8.9613	8.6097	8.8822	8.6773
SM(d14:0/18:4)	metab_515	yes	down	-	2.4382	2.3384	0.8722	0.02387	0.1825	SP	SM	sphingomyelin	鞘磷脂	7.172	6.0919	6.8297	5.3912	5.7541	7.4536	7.4247	7.9039	7.3693	7.3477	7.2088	7.1091
PC(18:2e/22:4)	metab_110	yes	down	-	1.5202	1.4306	0.9691	0.0009622	0.04652	GP	PC	phosphatidylcholine	磷脂酰胆碱	8.9067	9.0503	8.7987	8.8487	8.9741	8.7876	9.0969	9.1373	9.3376	9.0587	9.2846	9.1524
SM(d18:1/22:1)	metab_139	yes	down	-	1.2084	1.1538	0.9809	0.001939	0.06735	SP	SM	sphingomyelin	鞘磷脂	9.857	9.7055	9.7543	9.8458	9.9381	9.8754	9.9998	9.9797	10.1353	9.9756	10.0583	9.9458
SM(d20:1/23:3)	metab_205	yes	down	-	1.7169	1.614	0.9629	0.000573	0.0398	SP	SM	sphingomyelin	鞘磷脂	9.2567	8.9626	9.1191	9.0972	9.3585	9.0878	9.5314	9.5197	9.6558	9.3497	9.5077	9.4277
PC(18:2e/22:3)	metab_399	yes	down	-	2.1361	2.0555	0.9059	0.03409	0.21	GP	PC	phosphatidylcholine	磷脂酰胆碱	6.7957	8.3391	7.6901	6.2595	7.7153	7.5297	8.1393	8.2809	8.2653	8.006	8.3705	7.8655
PC(10:1e/14:4)	metab_436	yes	up	-	1.0916	1.0776	1.024	0.02008	0.1784	GP	PC	phosphatidylcholine	磷脂酰胆碱	7.6863	8.0056	7.8699	7.8843	7.977	7.6551	7.628	7.5715	7.6813	7.5999	7.7642	7.724
DG(16:2e/14:0)	metab_507	yes	up	-	2.9478	2.7605	1.2022	0.01587	0.1497	GL	DG	diglyceride	甘油二酯	7.8989	7.193	7.9698	7.6109	7.001	8.0668	5.6274	6.3544	5.3067	7.7196	5.69	7.345
PC(20:4/22:6)	metab_90	yes	down	-	1.2718	1.203	0.9713	0.01155	0.1401	GP	PC	phosphatidylcholine	磷脂酰胆碱	8.0808	8.1392	7.8989	7.8423	7.8721	8.1528	8.1237	8.3666	8.1619	8.2421	8.3944	8.114
LPC(20:3)	metab_91	yes	down	C04230	1.3683	1.2925	0.9718	0.01447	0.143	GP	LPC	lysophosphatidylcholine	溶血磷脂酰胆碱	9.7261	9.7002	9.3638	9.4774	9.2719	9.7711	9.8175	9.9348	9.6712	9.8267	9.8063	9.9156
SM(d18:1/21:0)	metab_92	yes	down	-	1.3148	1.2551	0.9734	0.01074	0.1379	SP	SM	sphingomyelin	鞘磷脂	9.2314	8.9048	9.1468	9.1319	9.4111	9.3114	9.3728	9.5124	9.5788	9.3479	9.4594	9.375
PC(16:1/20:4)	metab_238	yes	up	-	1.1509	1.1001	1.0202	0.01241	0.1429	GP	PC	phosphatidylcholine	磷脂酰胆碱	9.6821	9.7918	9.8057	9.9687	9.9252	9.6887	9.6105	9.4892	9.7193	9.5039	9.6431	9.7288
TG(4:0/18:2/22:3)	metab_246	yes	down	-	1.0961	1.0246	0.9834	0.003769	0.07454	GL	TG	triglyceride	甘油三酯	9.1834	9.3153	9.2769	9.1261	9.3044	9.1059	9.4226	9.3782	9.3647	9.3019	9.4143	9.3669
PC(15:0/18:3)	metab_370	yes	up	-	1.6107	1.5249	1.0425	0.001857	0.06735	GP	PC	phosphatidylcholine	磷脂酰胆碱	8.3698	8.0244	8.3513	8.201	8.2035	7.9769	7.7791	7.7587	7.7571	7.9789	7.9924	7.8583
TG(18:0/18:1/24:0)	metab_414	yes	up	-	2.2517	2.183	1.1264	0.04049	0.2194	GL	TG	triglyceride	甘油三酯	7.7856	6.973	8.0853	7.9823	7.3775	7.5699	6.5121	5.4234	7.2835	7.4778	7.415	6.5246
AcCa(18:2)	metab_8	yes	down	-	1.1148	1.069	0.9749	0.04384	0.2278	FA	AcCa	Acyl Carnitine	酰基肉碱	8.1231	8.3657	7.7982	8.0161	8.22	8.1024	8.3512	8.3182	8.1602	8.2039	8.3912	8.4538
PC(16:0/22:6)	metab_72	yes	up	-	1.1765	1.1343	1.0195	0.00436	0.07571	GP	PC	phosphatidylcholine	磷脂酰胆碱	9.6255	9.8587	9.7843	9.8351	9.799	9.7014	9.632	9.4464	9.5865	9.5069	9.6215	9.6886
Co(Q10)	metab_137	yes	down	-	1.2924	1.2155	0.9727	0.009227	0.1259	FA	Co	Coenzyme	辅酶	8.3119	8.4939	8.4619	8.3085	8.3831	8.2646	8.7877	8.4338	8.7945	8.5278	8.6003	8.4898
SM(d17:1/18:3)	metab_141	yes	down	-	1.3185	1.2492	0.9716	0.01083	0.1379	SP	SM	sphingomyelin	鞘磷脂	8.6334	8.3362	8.541	8.5295	8.8104	8.7225	8.7843	8.893	8.9885	8.678	8.8953	8.8452
TG(16:0/16:0/22:6)	metab_183	yes	up	-	1.3304	1.2228	1.0312	0.02438	0.1825	GL	TG	triglyceride	甘油三酯	8.667	8.8865	8.6562	8.9875	8.6354	8.9628	8.3638	8.5596	8.8387	8.612	8.4836	8.3426
PC(10:0e/11:3)	metab_394	yes	down	-	1.5938	1.5083	0.9476	0.02254	0.1824	GP	PC	phosphatidylcholine	磷脂酰胆碱	7.2311	7.5911	6.9367	6.8874	7.018	7.5625	7.718	7.8002	7.2912	7.6141	7.5001	7.6872
PE(18:0p/18:2)	metab_73	yes	down	-	1.0998	1.049	0.9825	0.003102	0.07306	GP	PE	phosphatidylethanolamine	磷脂酰乙醇胺	8.7393	8.5629	8.6896	8.6864	8.6903	8.5646	8.8226	8.8262	8.7013	8.8604	8.7726	8.8747
Cer(d16:0/18:2)	metab_426	yes	down	-	1.7299	1.6295	0.9431	0.007357	0.1124	SP	Cer	Ceramides	神经酰胺	6.9131	7.2683	6.774	6.7039	6.6777	7.1262	7.3975	7.5426	7.0666	7.3488	7.1404	7.4718
PE(18:0p/22:6)	metab_123	yes	down	-	1.2784	1.2055	0.9759	0.002919	0.07306	GP	PE	phosphatidylethanolamine	磷脂酰乙醇胺	8.5879	8.8002	8.5494	8.6115	8.7689	8.5387	8.7593	8.892	8.9004	8.778	8.932	8.8723
SM(d20:0/18:1)	metab_62	yes	down	-	1.1966	1.1357	0.9809	0.002868	0.07306	SP	SM	sphingomyelin	鞘磷脂	9.72	9.617	9.6985	9.6509	9.8292	9.783	9.887	9.8983	10.0684	9.8094	9.9016	9.8654
PC(20:2e/24:2)	metab_310	yes	down	-	1.2772	1.1984	0.9741	0.007724	0.1157	GP	PC	phosphatidylcholine	磷脂酰胆碱	8.4159	8.5927	8.6045	8.4348	8.5609	8.3877	8.8971	8.5921	8.8804	8.6335	8.7285	8.6183
CL(22:6/16:1/22:0/22:3)	metab_365	yes	up	-	1.0587	1.0548	1.0217	0.01317	0.1429	GP	CL	Cardiolipin	心磷脂	7.8183	8.0301	8.009	7.8844	8.0292	7.7598	7.8106	7.6729	7.7082	7.6921	7.8065	7.8319
PC(18:2/13:0)	metab_427	yes	up	-	1.2261	1.1739	1.0302	0.02813	0.1954	GP	PC	phosphatidylcholine	磷脂酰胆碱	8.4092	8.0479	8.3083	8.5271	8.3415	8.1009	7.8739	8.0147	7.9313	8.2809	8.0917	8.082
PE(16:2e/21:0)	metab_418	yes	down	-	1.3256	1.2583	0.9783	0.0002645	0.03368	GP	PE	phosphatidylethanolamine	磷脂酰乙醇胺	9.1897	9.1733	9.3054	9.1954	9.229	9.2125	9.3499	9.5321	9.375	9.3727	9.5085	9.392
TG(18:0/16:0/18:1)	metab_16	yes	up	-	1.2693	1.2217	1.027	0.03104	0.2036	GL	TG	triglyceride	甘油三酯	10.0222	9.6252	9.9961	10.17	9.9365	10.0098	9.5	9.7183	9.6286	9.8563	9.9542	9.5295
PG(31:1/18:3)	metab_428	yes	down	-	1.4631	1.4532	0.9605	0.02733	0.1933	GP	PG	phosphatidylglycerol	磷脂酰甘油	8.6617	8.1679	8.2398	8.5362	8.1842	8.7758	8.5355	9.1129	8.6681	8.8409	8.6969	8.7967
PC(16:0e/18:1)	metab_59	yes	down	-	1.0928	1.0204	0.9839	0.004023	0.07454	GP	PC	phosphatidylcholine	磷脂酰胆碱	9.5289	9.6524	9.6198	9.4759	9.6531	9.438	9.7554	9.7177	9.7085	9.6459	9.7662	9.7088
LPC(16:1e)	metab_207	yes	down	-	1.1016	1.0517	0.9771	0.03225	0.2036	GP	LPC	lysophosphatidylcholine	溶血磷脂酰胆碱	8.4827	8.2529	8.2719	8.3716	8.2034	8.3099	8.3885	8.7436	8.2722	8.5087	8.5827	8.5625
PC(16:0/18:1)	metab_81	yes	up	-	1.189	1.1396	1.0201	0.004066	0.07454	GP	PC	phosphatidylcholine	磷脂酰胆碱	9.4243	9.5232	9.59	9.6064	9.6688	9.4949	9.4046	9.2621	9.4466	9.2599	9.345	9.459
PC(20:4/20:4)	metab_138	yes	down	C00157	1.157	1.1041	0.9783	0.01425	0.143	GP	PC	phosphatidylcholine	磷脂酰胆碱	8.926	8.8447	8.8066	8.7517	8.6463	8.9397	9.0334	9.1409	8.8001	9.0836	9.0525	8.9787
TG(16:0/14:0/18:1)	metab_142	yes	up	-	1.2051	1.15	1.0277	0.04928	0.2477	GL	TG	triglyceride	甘油三酯	9.4637	8.9515	9.4957	9.3595	9.4274	9.6051	9.038	9.252	8.8947	9.3432	9.1568	9.1019
PC(18:3e/16:0)	metab_151	yes	down	-	1.0048	0.9975	0.9842	0.02461	0.1825	GP	PC	phosphatidylcholine	磷脂酰胆碱	9.5573	9.4555	9.7185	9.7734	9.6763	9.4547	9.7598	9.7769	9.6769	9.7853	9.793	9.771
DG(16:1e/18:1)	metab_271	yes	up	-	1.0305	0.9873	1.0201	0.02219	0.1824	GL	DG	diglyceride	甘油二酯	8.4709	8.5359	8.6583	8.8127	8.4346	8.4796	8.4749	8.3351	8.3782	8.3494	8.4341	8.4031
SM(d14:0/23:6)	metab_378	yes	down	-	1.04	0.964	0.979	0.02316	0.1824	SP	SM	sphingomyelin	鞘磷脂	7.6969	7.5446	7.5774	7.6229	7.7796	7.5437	7.8644	7.7455	7.9035	7.5997	7.8925	7.747
PE(20:0p/22:6)	metab_448	yes	down	-	1.3228	1.2503	0.9703	0.00328	0.0737	GP	PE	phosphatidylethanolamine	磷脂酰乙醇胺	7.5704	7.7999	7.4547	7.4437	7.5216	7.5253	7.7711	7.7323	7.9108	7.7448	7.8137	7.7301
CerG3GNAc1(d18:1/16:0)	metab_505	yes	down	-	1.7174	1.6328	0.9529	0.0005717	0.0398	SP	CerG3GNAc1	Simple Glc series	糖基神经酰胺	7.1809	7.1049	7.1406	7.1858	7.356	7.4817	7.5527	7.7538	7.6836	7.4913	7.5941	7.5249
TG(25:0/16:0/18:1)	metab_539	yes	up	-	1.7836	1.721	1.0781	0.03902	0.2194	GL	TG	triglyceride	甘油三酯	7.4381	6.7089	7.6633	7.7048	7.1774	7.3715	6.5711	7.0269	6.6953	7.3371	7.0496	6.1939
SM(d20:0/24:4)	metab_222	yes	down	-	1.7291	1.6245	0.9649	0.0001344	0.03368	SP	SM	sphingomyelin	鞘磷脂	9.4886	9.3845	9.3185	9.3268	9.5171	9.2564	9.7162	9.7562	9.8876	9.6222	9.7161	9.6418
MePC(22:6/11:1)	metab_309	yes	up	-	1.3428	1.3438	1.0385	0.03069	0.2036	GP	MePC	Methyl phosphatidylcholine	甲基磷脂酰胆碱	8.0416	8.0615	8.0512	7.9403	8.3516	7.7627	7.734	7.4506	7.8587	7.5193	7.8279	8.0289
GM3(d18:1/16:0)	metab_386	yes	down	-	1.7392	1.6719	0.9439	0.004563	0.07748	SP	GM3	Gangliosides	神经节苷脂	7.0167	6.9251	6.9491	6.9047	7.159	7.4671	7.3503	7.6183	7.8001	7.4236	7.3303	7.4154
TG(18:0/16:0/17:0)	metab_396	yes	up	-	2.5291	2.3719	1.1202	0.004098	0.07454	GL	TG	triglyceride	甘油三酯	8.099	7.2146	7.7452	8.0891	8.1908	7.9556	6.5183	6.7992	7.4222	6.8977	7.6726	6.9036
Hex1Cer(t18:0/16:1)	metab_443	yes	down	-	1.3576	1.263	0.9704	0.0009391	0.04652	SP	Hex1Cer	Simple Glc series	糖基神经酰胺	7.1928	7.1946	7.1788	7.2646	7.2589	6.9946	7.5205	7.4084	7.3548	7.3614	7.3916	7.365
TG(16:0/16:0/16:0)	metab_48	yes	up	-	1.42	1.3494	1.0384	0.04141	0.2194	GL	TG	triglyceride	甘油三酯	9.4103	8.7298	9.2735	9.4978	9.4722	9.1186	8.6427	9.014	8.8272	9.1767	9.0634	8.7224
PC(18:1/22:6)	metab_77	yes	up	-	1.0376	1.0094	1.0208	0.01826	0.1681	GP	PC	phosphatidylcholine	磷脂酰胆碱	8.3319	8.4279	8.3821	8.2554	8.1812	8.1731	8.1563	7.9992	8.044	8.0627	8.2389	8.2352
MePC(20:4e/23:1)	metab_94	yes	down	-	1.2167	1.1407	0.9727	0.02276	0.1824	GP	MePC	Methyl phosphatidylcholine	甲基磷脂酰胆碱	8.1328	8.4538	8.0637	8.0854	7.9511	7.9762	8.3377	8.3288	8.4378	8.2156	8.4748	8.242
PC(18:0e/22:5)	metab_125	yes	down	-	1.0898	1.0175	0.9784	0.0383	0.2194	GP	PC	phosphatidylcholine	磷脂酰胆碱	8.6975	9.0415	8.8005	8.7746	8.7748	8.6026	8.9578	8.8923	8.9285	8.8278	9.0367	9.2153
PC(22:6/13:0)	metab_383	yes	up	-	1.3087	1.2838	1.0303	0.01364	0.143	GP	PC	phosphatidylcholine	磷脂酰胆碱	8.3122	8.5858	8.2032	8.385	8.614	8.2924	7.9229	8.2174	8.1621	8.2133	8.173	8.2234
TG(16:0/18:1/23:1)	metab_579	yes	up	-	1.6663	1.5684	1.0525	0.007985	0.1173	GL	TG	triglyceride	甘油三酯	7.5625	7.6107	7.7446	7.9498	7.4823	7.8292	7.3754	7.2088	7.2902	7.7103	7.2502	7.0454
PC(20:1e/24:2)	metab_802	yes	down	-	1.3625	1.2807	0.9694	0.004746	0.07882	GP	PC	phosphatidylcholine	磷脂酰胆碱	7.7682	7.8915	7.9091	7.7806	7.8127	7.7088	8.2382	7.9241	8.2514	7.9405	8.037	7.9627
SM(t18:1/22:3)	metab_846	yes	down	-	1.0732	1.0091	0.9785	0.02983	0.2036	SP	SM	sphingomyelin	鞘磷脂	8.2097	7.9756	8.1923	8.2106	8.2496	8.0225	8.3833	8.1557	8.3592	8.1645	8.4574	8.4111
DG(16:0/16:0)	metab_676	yes	up	C00165	1.5239	1.4443	1.047	0.01275	0.1429	GL	DG	diglyceride	甘油二酯	7.7592	7.544	7.6248	7.6699	7.4388	7.5514	7.0793	7.0821	7.0017	7.6543	7.4401	7.2823
Cer(t18:1/22:2)	metab_744	yes	up	-	1.1078	1.0672	1.026	0.02387	0.1825	SP	Cer	Ceramides	神经酰胺	7.61	7.7832	7.7122	7.426	7.5945	7.646	7.5396	7.1904	7.4471	7.5067	7.4168	7.517
PC(10:0e/6:0)	metab_787	yes	down	-	1.6109	1.5111	0.9571	0.006951	0.1095	GP	PC	phosphatidylcholine	磷脂酰胆碱	8.115	8.1733	7.712	7.8416	7.7305	8.2072	8.4976	8.3939	8.1716	8.272	8.2149	8.3713
Hex1Cer(d18:1/16:1)	metab_584	yes	down	-	1.3576	1.263	0.9703	0.0009391	0.04652	SP	Hex1Cer	Simple Glc series	糖基神经酰胺	7.191	7.1928	7.177	7.2628	7.2571	6.9928	7.5187	7.4066	7.353	7.3596	7.3898	7.3632
DG(16:2e/12:0)	metab_753	yes	up	-	2.2392	2.0943	1.1493	0.03533	0.2159	GL	DG	diglyceride	甘油二酯	6.0056	5.2186	6.8114	6.6913	6.0794	7.0766	5.8408	6.1581	5.6226	5.2635	4.8943	5.1864
PC(18:3e/22:6)	metab_800	yes	down	-	2.1306	2.0693	0.9111	0.001645	0.06614	GP	PC	phosphatidylcholine	磷脂酰胆碱	6.0541	5.6367	5.5734	5.9778	5.6993	5.8548	6.4412	6.2751	6.0269	6.7809	6.1972	6.4713
PC(16:1e/24:2)	metab_593	yes	up	-	2.2688	2.2022	1.1241	0.03687	0.2194	GP	PC	phosphatidylcholine	磷脂酰胆碱	7.6063	6.4191	8.1996	8.0307	7.5948	8.167	6.7651	6.593	6.6567	7.8648	6.7922	6.2635
PC(11:0/22:4)	metab_679	yes	up	-	1.5318	1.5106	1.0384	0.002131	0.0708	GP	PC	phosphatidylcholine	磷脂酰胆碱	8.2461	8.3135	8.1809	8.1627	8.4059	7.8918	7.9021	7.8779	7.8394	7.9085	7.8815	7.9718
CerG3GNAc1(t18:0/16:0)	metab_748	yes	down	-	1.7174	1.6328	0.9529	0.0005717	0.0398	SP	CerG3GNAc1	Simple Glc series	糖基神经酰胺	7.1809	7.1049	7.1406	7.1858	7.356	7.4817	7.5527	7.7538	7.6836	7.4913	7.5941	7.5249
DG(18:1/18:3)	metab_759	yes	up	-	1.4248	1.3418	1.0372	0.01693	0.1578	GL	DG	diglyceride	甘油二酯	8.651	8.6293	8.6464	8.4737	8.3026	8.55	8.1064	8.0038	8.0308	8.5677	8.3795	8.3266
MePC(12:0e/20:4)	metab_777	yes	down	-	1.0938	1.0243	0.9807	0.008351	0.1204	GP	MePC	Methyl phosphatidylcholine	甲基磷脂酰胆碱	8.4806	8.6389	8.4316	8.4658	8.5849	8.3709	8.5878	8.6497	8.6671	8.6154	8.8036	8.6474
MePC(18:4/20:4)	metab_785	yes	up	-	1.3923	1.4383	1.0373	0.01497	0.143	GP	MePC	Methyl phosphatidylcholine	甲基磷脂酰胆碱	8.1268	8.1182	8.0439	7.749	8.134	7.9248	7.9714	7.7541	7.86	7.5584	7.4694	7.7518
PE(22:5/18:2)	metab_821	yes	down	-	1.7135	1.6367	0.9571	0.0002298	0.03368	GP	PE	phosphatidylethanolamine	磷脂酰乙醇胺	7.7514	7.5194	7.5295	7.7141	7.8296	7.7565	7.9927	8.1113	8.0821	8.0868	7.9752	7.9141
TG(16:0/12:0/19:0)	metab_878	yes	down	-	1.935	1.8443	0.9429	0.0147	0.143	GL	TG	triglyceride	甘油三酯	8.8496	9.7638	9.746	8.9216	9.8945	9.6798	9.9733	10.0748	10.2418	9.963	10.0131	10.0104
PE(26:0/12:4)	metab_575	yes	down	-	1.4365	1.3722	0.9714	0.0004731	0.0398	GP	PE	phosphatidylethanolamine	磷脂酰乙醇胺	8.4365	8.2956	8.3221	8.4676	8.5704	8.4217	8.6511	8.713	8.738	8.7147	8.59	8.5939
DG(18:1/20:4)	metab_675	yes	up	-	1.0874	1.0215	1.0256	0.03115	0.2036	GL	DG	diglyceride	甘油二酯	7.6666	7.9084	7.7185	7.6924	7.5147	7.6191	7.4982	7.272	7.5264	7.6858	7.5316	7.4588
PC(8:1e/12:3)	metab_606	yes	down	-	1.481	1.3909	0.9633	0.003071	0.07306	GP	PC	phosphatidylcholine	磷脂酰胆碱	7.5869	7.6751	7.3789	7.3323	7.3267	7.5681	7.7799	7.883	7.5937	7.7811	7.7174	7.824
StE(0:0)	metab_602	yes	down	-	1.4644	1.435	0.9485	0.04013	0.2194	ST	StE	Stigmasterol Ester	豆甾醇酯	6.5921	7.4441	6.7883	6.4619	6.8542	6.8538	7.2274	7.2328	7.4282	6.9461	7.0337	7.3476
MePC(12:0/22:6)	metab_780	yes	up	-	1.0234	0.986	1.0201	0.04069	0.2194	GP	MePC	Methyl phosphatidylcholine	甲基磷脂酰胆碱	9.0716	9.2013	9.1968	9.3767	9.3212	8.9854	9.0109	8.8314	9.1	8.9153	9.0673	9.1426
PC(8:0e/9:0)	metab_788	yes	down	-	1.1134	1.0742	0.9735	0.03718	0.2194	GP	PC	phosphatidylcholine	磷脂酰胆碱	7.8665	7.648	7.6487	7.6704	7.7005	7.9713	7.8174	8.2537	7.8153	8.0029	7.8712	8.0121
PE(8:1e/14:4)	metab_632	yes	up	-	1.582	1.5558	1.0422	0.001063	0.04778	GP	PE	phosphatidylethanolamine	磷脂酰乙醇胺	7.5495	7.8665	7.7751	7.714	7.8377	7.5148	7.5197	7.3624	7.4054	7.2809	7.4408	7.3778
TG(18:1/18:2/21:0)	metab_911	yes	up	-	2.1523	2.0563	1.1188	0.0258	0.1859	GL	TG	triglyceride	甘油三酯	6.6656	6.5936	7.4968	7.7103	6.1154	7.5262	6.6784	6.1063	6.1425	5.9544	6.4722	6.2821
SM(t18:1/18:2)	metab_639	yes	down	-	1.5974	1.5002	0.9604	0.0004417	0.0398	SP	SM	sphingomyelin	鞘磷脂	7.3793	7.0815	7.2528	7.1791	7.2786	7.3479	7.6618	7.5997	7.5355	7.3955	7.5886	7.5294
Cer(t18:0/25:0)	metab_746	yes	down	-	1.0882	1.0429	0.977	0.02104	0.1824	SP	Cer	Ceramides	神经酰胺	7.917	7.7749	7.9578	7.7303	8.0042	7.9371	8.1428	7.9433	8.2634	8.1068	8.0481	7.9326
PC(12:0e/6:0)	metab_789	yes	down	-	1.415	1.3334	0.9709	0.01038	0.1368	GP	PC	phosphatidylcholine	磷脂酰胆碱	9.7195	9.6898	9.2981	9.502	9.3385	9.746	9.8068	9.9578	9.6761	9.8251	9.8137	9.9329
TG(4:0/15:0/19:1)	metab_865	yes	down	-	1.2312	1.1355	0.9655	0.0338	0.2099	GL	TG	triglyceride	甘油三酯	6.4476	6.8134	6.8356	6.779	6.8773	6.5612	7.2204	6.9152	6.8541	6.7882	7.0998	6.8778
CL(20:4/16:0/20:0/22:0)	metab_629	yes	up	-	1.3	1.2711	1.0262	0.001868	0.06735	GP	CL	Cardiolipin	心磷脂	8.1164	8.3471	8.2874	8.1942	8.3416	8.3121	8.1575	8.0571	8.1374	7.9783	7.9514	8.05
PE(19:0/18:2)	metab_660	yes	up	-	1.7639	1.7312	1.0489	0.001512	0.06417	GP	PE	phosphatidylethanolamine	磷脂酰乙醇胺	8.2987	8.7315	8.5077	8.3949	8.4703	8.1867	8.0869	7.8989	8.1415	7.8752	8.1215	8.1114
MePC(18:4/16:1)	metab_646	yes	up	-	1.2687	1.2164	1.0238	0.002562	0.07306	GP	MePC	Methyl phosphatidylcholine	甲基磷脂酰胆碱	8.8293	8.9739	9.0409	8.9988	9.0808	8.8484	8.7557	8.6658	8.8569	8.6667	8.777	8.8037
TG(18:1/10:1/18:2)	metab_688	yes	up	-	2.6239	2.499	1.1601	0.01423	0.143	GL	TG	triglyceride	甘油三酯	6.8272	7.5853	6.955	7.307	6.4709	8.3751	6.6675	6.7924	6.1395	5.8701	5.5499	6.4925
PE(18:0e/20:4)	metab_707	yes	down	-	1.2809	1.2128	0.9749	0.004021	0.07454	GP	PE	phosphatidylethanolamine	磷脂酰乙醇胺	8.5038	8.7395	8.4618	8.467	8.6689	8.4494	8.6497	8.8169	8.8104	8.7014	8.8336	8.7933
PE(16:2e/17:0)	metab_808	yes	down	-	2.71	2.5066	0.8334	0.04902	0.2477	GP	PE	phosphatidylethanolamine	磷脂酰乙醇胺	5.6182	6.5141	5.4233	6.7412	6.4868	6.2432	8.5376	8.4885	6.561	5.9006	8.5318	6.4104
PE(18:1p/20:5)	metab_705	yes	up	-	1.1929	1.1319	1.0386	0.03931	0.2194	GP	PE	phosphatidylethanolamine	磷脂酰乙醇胺	6.523	6.5163	6.3618	6.3124	6.3299	6.7444	6.067	6.118	6.0531	6.2122	6.494	6.4049
MePC(20:1e/20:4)	metab_720	yes	down	-	1.3604	1.2847	0.9698	0.002663	0.07306	GP	MePC	Methyl phosphatidylcholine	甲基磷脂酰胆碱	7.6881	7.8638	7.6087	7.6717	7.8254	7.6986	7.9526	7.9084	8.1513	7.844	8.043	7.9014
Hex1Cer(t18:0/23:0)	metab_769	yes	down	-	1.107	1.0677	0.9778	0.01135	0.1401	SP	Hex1Cer	Simple Glc series	糖基神经酰胺	7.6501	7.4165	7.6964	7.6506	7.7758	7.5104	7.8371	7.7566	7.7812	7.8332	7.8064	7.7282
TG(22:4/11:3/14:4)	metab_879	yes	down	-	1.2898	1.218	0.9742	0.003836	0.07454	GL	TG	triglyceride	甘油三酯	8.2973	8.5253	8.2513	8.2972	8.4837	8.2495	8.4588	8.5815	8.6305	8.4994	8.6639	8.5962
