# Supplementary material for: Multi-omics analysis of immunometabolic mechanisms linking IL-33 with asthma control in children
Source: Research Square preprint supplement (doi:10.21203/rs.3.rs-8032834/v1), 2025-11-25
Supplement: Supplementary file 4 [file dd487777c09bfa6dcb034ff3.docx]

**Fig.S1**


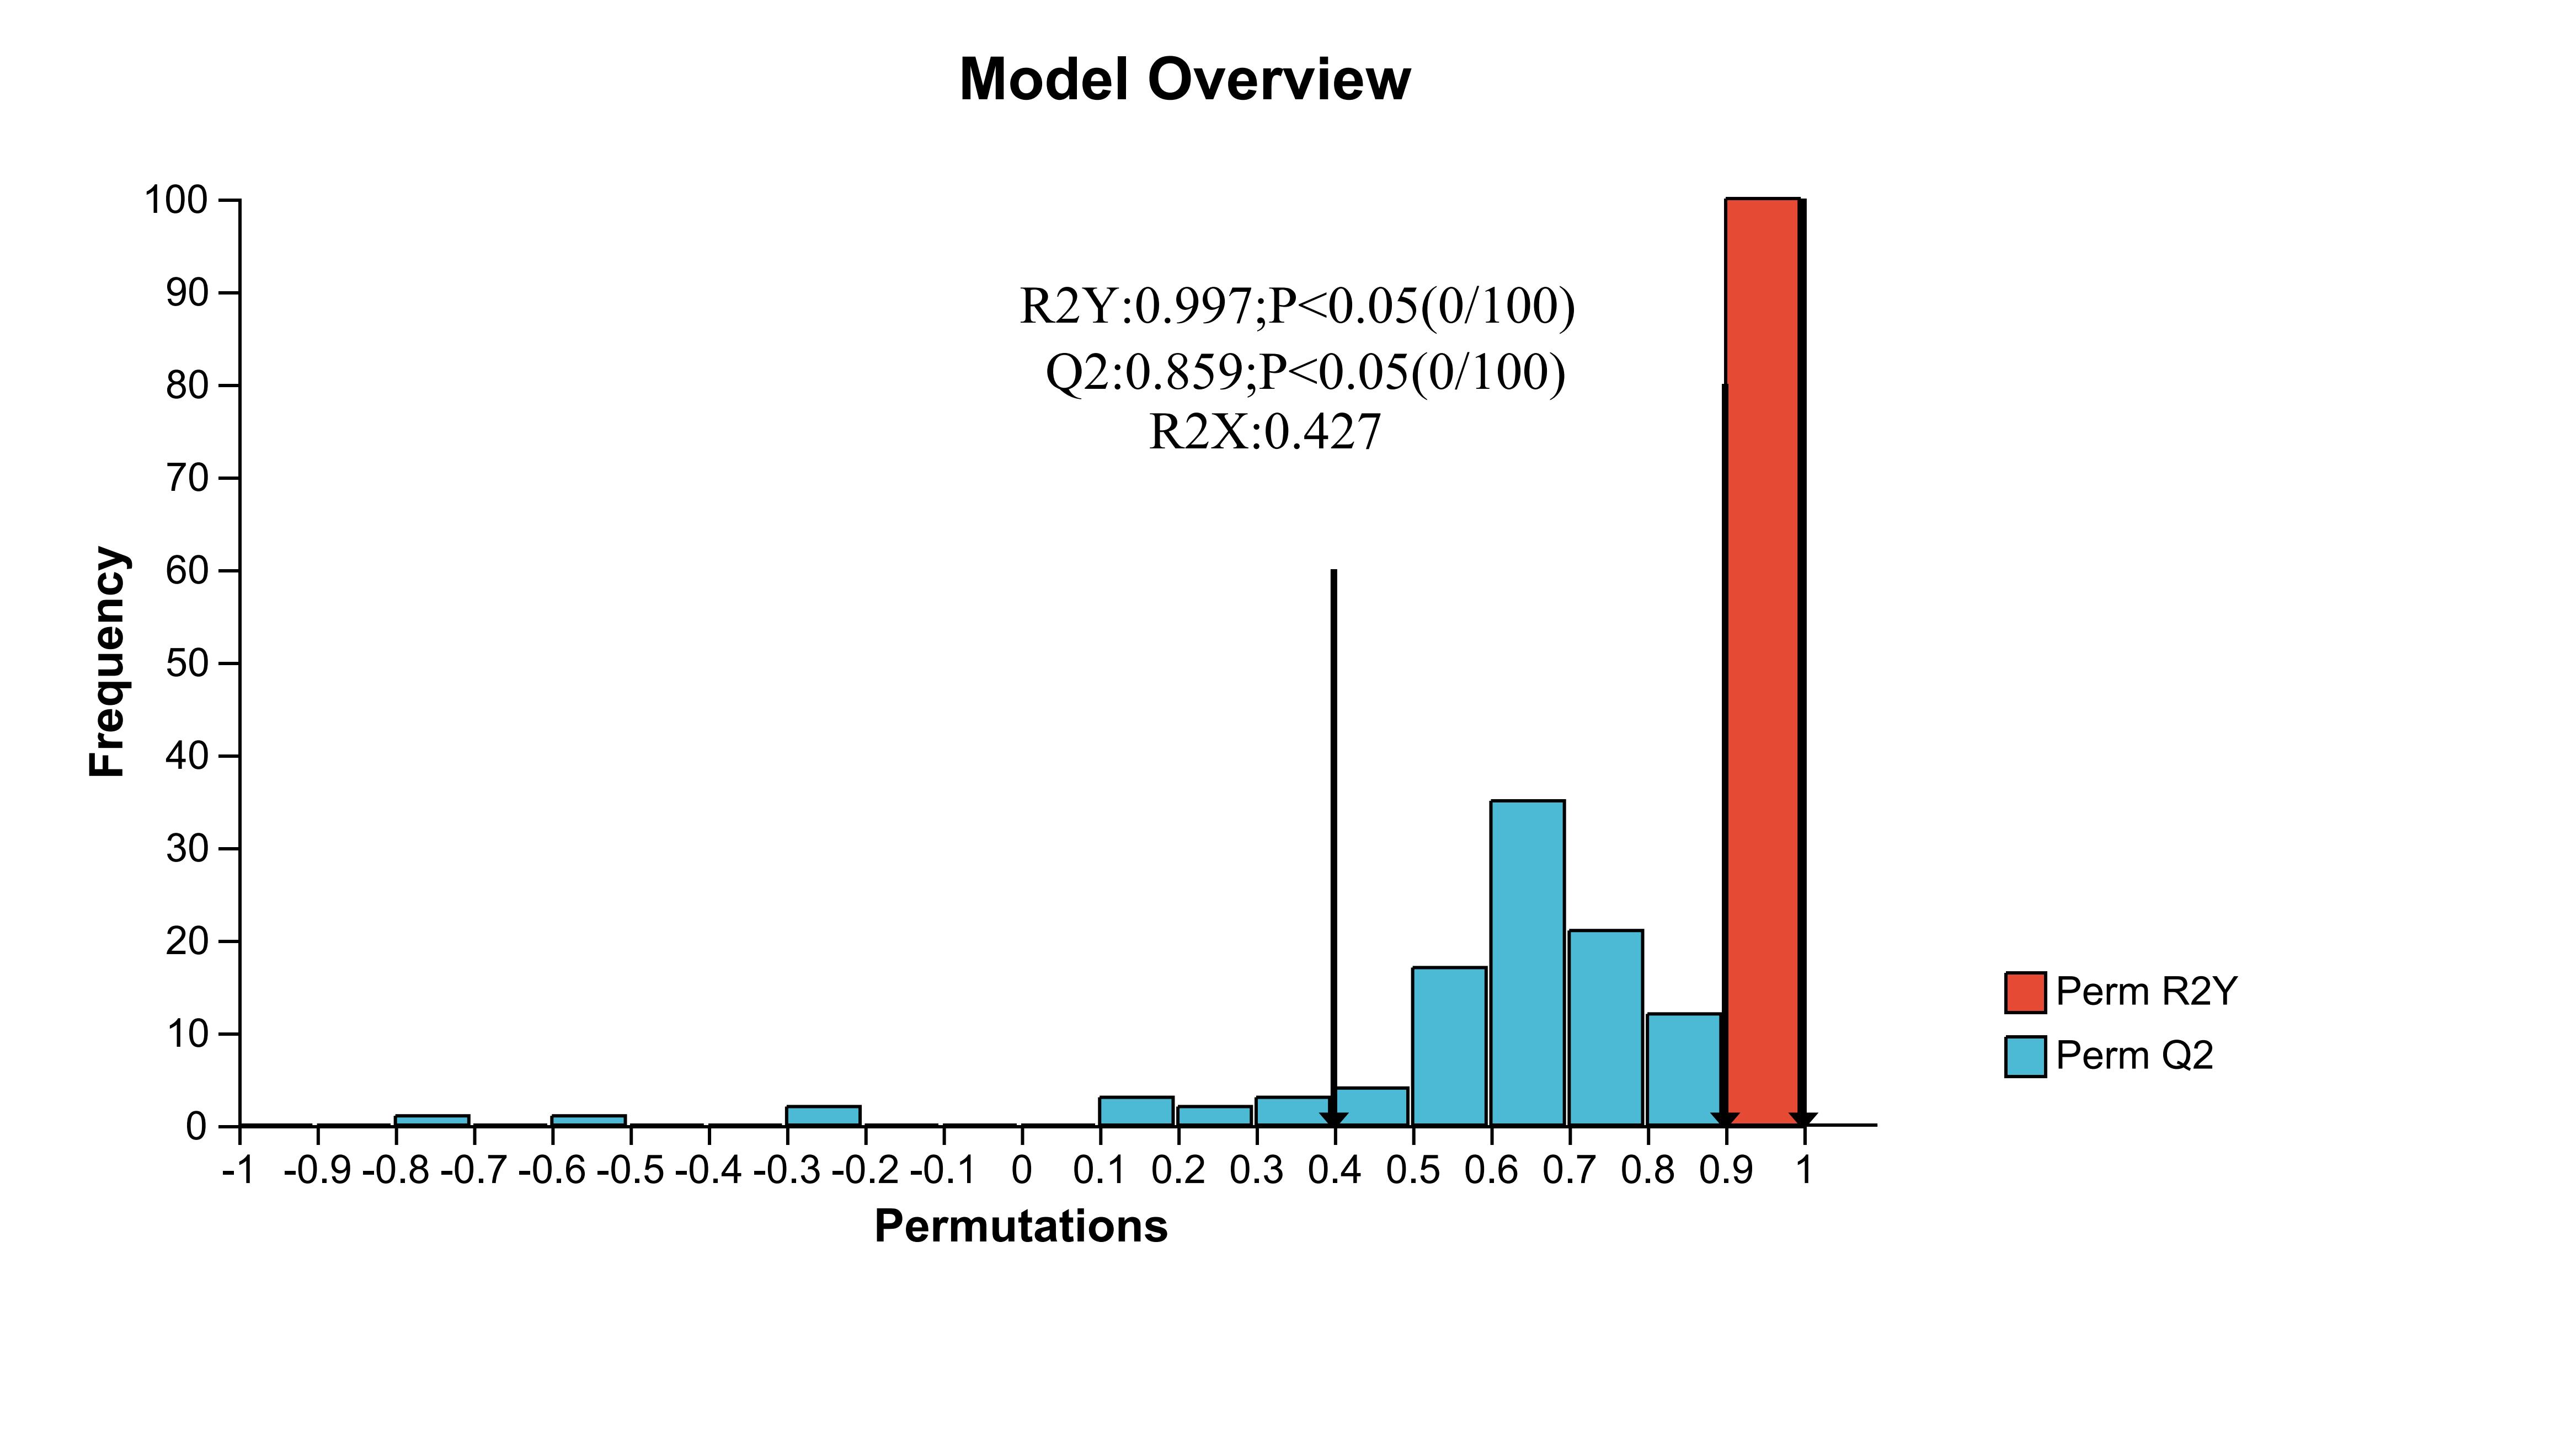


Fig.S2 The x-axis represents the accuracy of the permutation-based random models, and the y-axis represents the number of random models. Red bars indicate the frequency distribution of the Q² values obtained from permutation tests, while blue bars indicate the frequency distribution of the R²Y values. The p-value is calculated as:

p = (number of random models performing better than the original model) / (total number of permutation models).

For example, a Q² p-value of 0.01 indicates that, among 100 permutations, only 1 random model showed better predictive ability than the original model (1/100). Likewise, an R²Y p-value of 0.05 indicates that, among 100 permutations, 5 random models showed better explanatory ability than the original model (5/100). In general, p < 0.05 is taken to indicate that the model has good performance and is unlikely to be obtained by chance.

**Fig.S2**


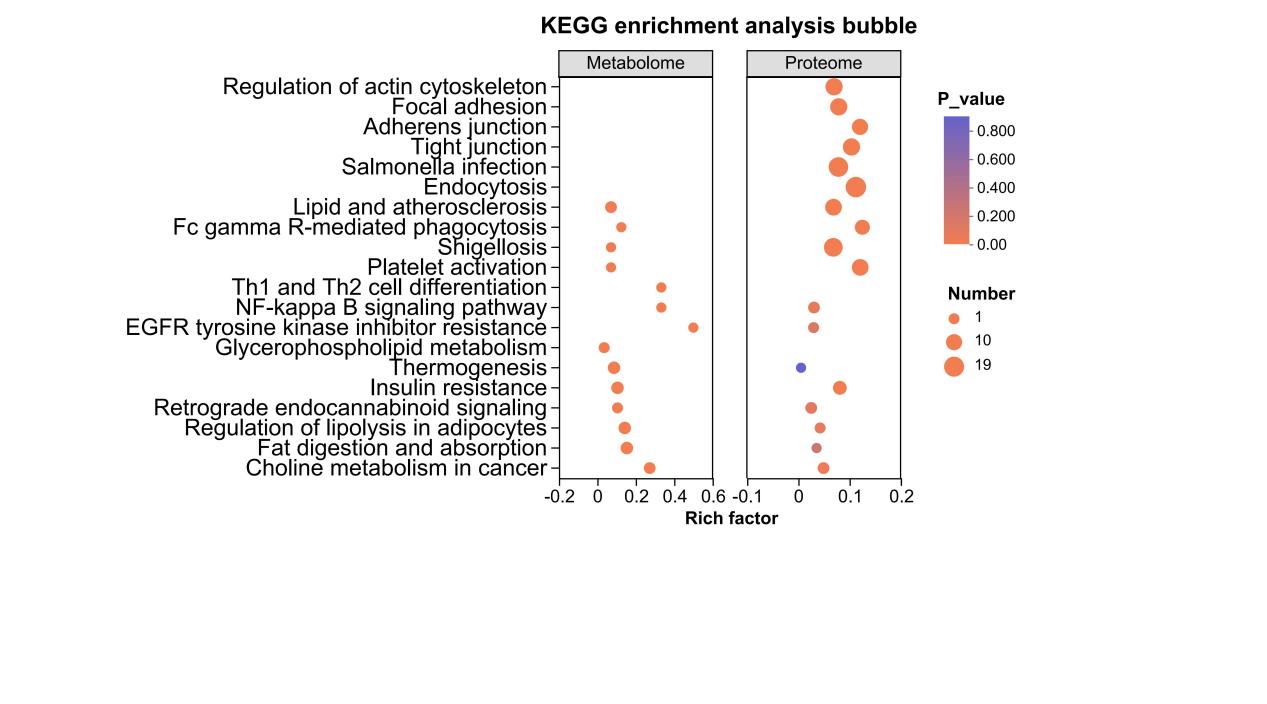


Fig. S2 Integrated KEGG enrichment analysis of lipidomics and proteomics

**Fig. S3**


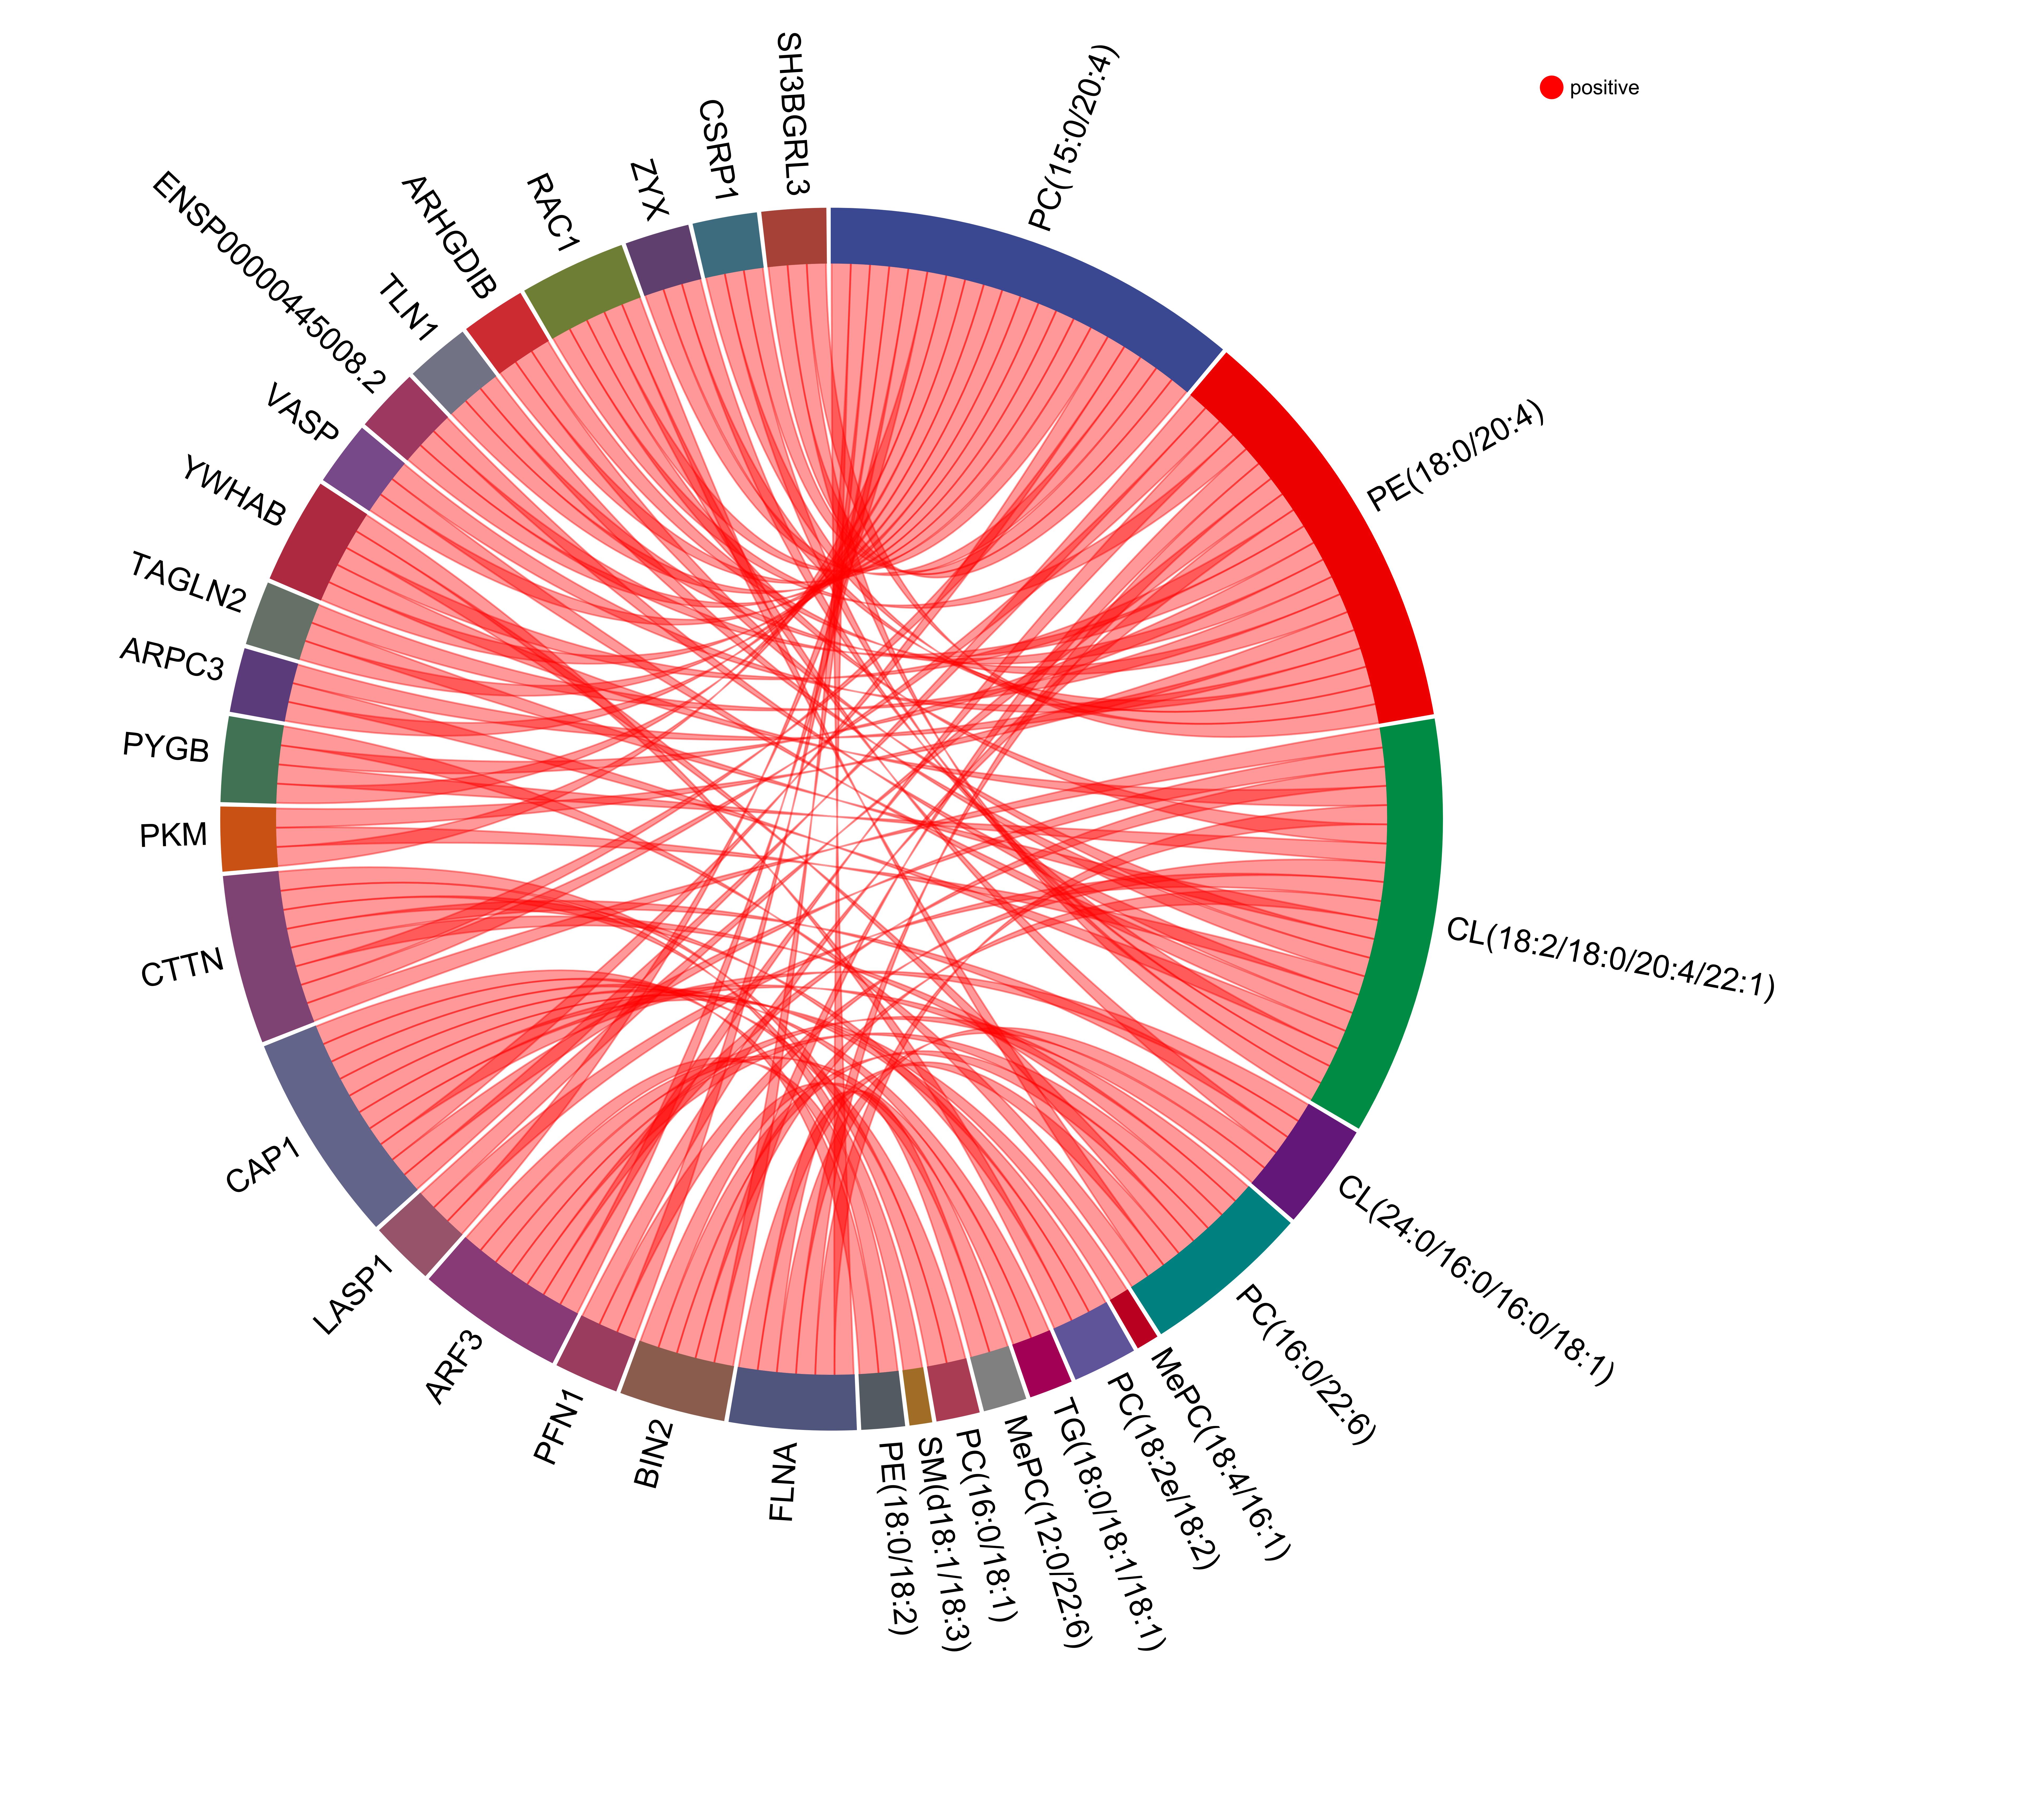


Fig.S3 Correlation Sankey plot for Fig. 4C cross-omics analysis.

Sankey diagram showing pairwise correlations between differential metabolites/lipids (left) and differential proteins (right) identified under the high vs. low IL-33 stratification. Each flow represents a statistically significant metabolite–protein correlation (FDR-controlled). Thicker flows indicate either stronger correlation or multiple metabolites converging on the same protein cluster. The plot highlights that multiple membrane-remodelling lipids (PC/PE/CL) simultaneously connect to actin/adhesion/endocytic proteins (e.g. VASP, TLN1, FLNA, ARPC3, TAGLN2), supporting a convergent IL-33-responsive module linking lipid remodelling to vesicle/cytoskeleton processes.

**Fig. S4**


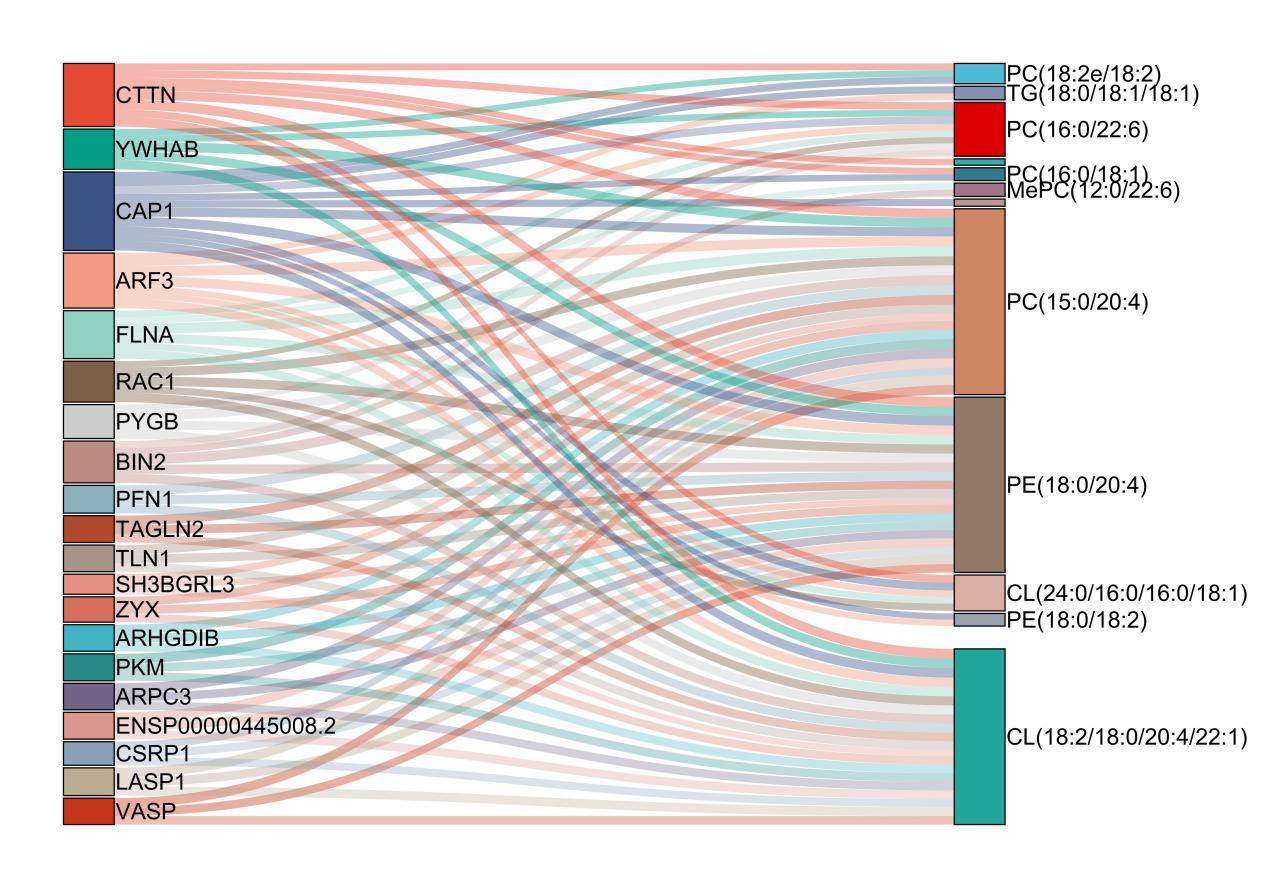


Fig. S4 Protein–metabolite correlation chord diagram for Fig. 4C.
Chord diagram depicting significant correlations between individual lipid/metabolite species (left half of the circle) and cytoskeleton/vesicle-related proteins (right half of the circle). Each chord denotes a metabolite–protein pair with significant correlation; red chords indicate positive correlations, and green chords indicate negative correlations. The figure illustrates a bidirectional pattern within classes: most PC/PE/CL species correlate positively with proteins involved in focal adhesion, actin remodelling and endocytosis (e.g. FLNA, VASP, RAC1, TLN1, ARPC3), whereas selected SM species show opposite associations, consistent with an IL-33-driven shift from SM-rich microdomains toward more flexible PC/PE/CL-enriched membranes.
